# Supplementary material
Source: Research Square preprint supplement (doi:10.21203/rs.3.rs-10072088/v1)
Supplement: Supplementary file 1 [file 16d76757c93e6efe4ebbb8b1.xlsx]

## Sheet: NC_TableS2_GLOBAL_module_delta
Broad_cell_type	Module	Delta_score	Direction
Microglia	Antigen_Presentation	-0.128565	Ctrl higher
Microglia	Homeostatic	1.13137	GWI higher
Microglia	Lipid_DAM	0.441942	GWI higher
Microglia	Pan_Apoptosis_Survival	-0.282843	Ctrl higher
Microglia	Pan_Cell_Stress_UPR	0.282843	GWI higher
Microglia	Pan_Chemokine	1.13137	GWI higher
Microglia	Pan_Complement	0.628539	GWI higher
Microglia	Pan_Cytokine	0.25713	GWI higher
Microglia	Pan_IEG_Activity_Response	-1.13137	Ctrl higher
Microglia	Pan_Inflammatory_Signaling	0.282843	GWI higher
Microglia	Pan_Interferon_Response	6.66134e-17	GWI higher
Microglia	Pan_Lipid_Metabolism	-0.25713	Ctrl higher
Microglia	Pan_Mitochondrial_OxPhos	0.282843	GWI higher
Microglia	Pan_NFkB_Signaling	0.235702	GWI higher
Microglia	Pan_Oxidative_Stress	-0.353553	Ctrl higher
Microglia	Phagocytosis_Lysosome	1.26535	GWI higher
Astrocyte	A1_Neurotoxic	0.424264	GWI higher
Astrocyte	A2_Neuroprotective	-0.707107	Ctrl higher
Astrocyte	Homeostatic_Astrocyte	1.41421	GWI higher
Astrocyte	Neurotransmitter_Clearance	1.41421	GWI higher
Astrocyte	Pan_Apoptosis_Survival	0.565685	GWI higher
Astrocyte	Pan_Cell_Stress_UPR	0.565685	GWI higher
Astrocyte	Pan_Chemokine	-0.282843	Ctrl higher
Astrocyte	Pan_Complement	-0.31427	Ctrl higher
Astrocyte	Pan_Cytokine	0.128565	GWI higher
Astrocyte	Pan_IEG_Activity_Response	-0.848528	Ctrl higher
Astrocyte	Pan_Inflammatory_Signaling	-1.41421	Ctrl higher
Astrocyte	Pan_Interferon_Response	-0.565685	Ctrl higher
Astrocyte	Pan_Lipid_Metabolism	0.385695	GWI higher
Astrocyte	Pan_Mitochondrial_OxPhos	0.282843	GWI higher
Astrocyte	Pan_NFkB_Signaling	-1.41421	Ctrl higher
Astrocyte	Pan_Oxidative_Stress	0.53033	GWI higher
Astrocyte	Reactive_Astrocyte_General	-0.353553	Ctrl higher
Excitatory Neuron	Neurodegeneration	-0.157135	Ctrl higher
Excitatory Neuron	Neuronal_Identity	0.565685	GWI higher
Excitatory Neuron	Pan_Apoptosis_Survival	-2.22045e-17	Ctrl higher
Excitatory Neuron	Pan_Cell_Stress_UPR	-0.565685	Ctrl higher
Excitatory Neuron	Pan_Chemokine	-0.141421	Ctrl higher
Excitatory Neuron	Pan_Complement	-0.157135	Ctrl higher
Excitatory Neuron	Pan_Cytokine	-0.385695	Ctrl higher
Excitatory Neuron	Pan_IEG_Activity_Response	-0.565685	Ctrl higher
Excitatory Neuron	Pan_Inflammatory_Signaling	0.141421	GWI higher
Excitatory Neuron	Pan_Interferon_Response	-0.565685	Ctrl higher
Excitatory Neuron	Pan_Lipid_Metabolism	0.642824	GWI higher
Excitatory Neuron	Pan_Mitochondrial_OxPhos	0.282843	GWI higher
Excitatory Neuron	Pan_NFkB_Signaling	0.117851	GWI higher
Excitatory Neuron	Pan_Oxidative_Stress	0.53033	GWI higher
Excitatory Neuron	Synaptic_Plasticity	-0.543928	Ctrl higher
Inhibitory Neuron	GABA_Synthesis	1.09994	GWI higher
Inhibitory Neuron	Pan_Apoptosis_Survival	0.565685	GWI higher
Inhibitory Neuron	Pan_Cell_Stress_UPR	-5.55112e-17	Ctrl higher
Inhibitory Neuron	Pan_Chemokine	1.13137	GWI higher
Inhibitory Neuron	Pan_Complement	0.157135	GWI higher
Inhibitory Neuron	Pan_Cytokine	0.25713	GWI higher
Inhibitory Neuron	Pan_IEG_Activity_Response	-0.848528	Ctrl higher
Inhibitory Neuron	Pan_Inflammatory_Signaling	-0.141421	Ctrl higher
Inhibitory Neuron	Pan_Interferon_Response	0.848528	GWI higher
Inhibitory Neuron	Pan_Lipid_Metabolism	0.25713	GWI higher
Inhibitory Neuron	Pan_Mitochondrial_OxPhos	0.471405	GWI higher
Inhibitory Neuron	Pan_NFkB_Signaling	-3.70074e-17	Ctrl higher
Inhibitory Neuron	Pan_Oxidative_Stress	0.883883	GWI higher
Inhibitory Neuron	SST_Identity	0.606092	GWI higher
Inhibitory Neuron	VIP_Identity	0.707107	GWI higher
Oligodendrocyte	Lipid_Synthesis	0.353553	GWI higher
Oligodendrocyte	Myelination	0.282843	GWI higher
Oligodendrocyte	Pan_Apoptosis_Survival	0.282843	GWI higher
Oligodendrocyte	Pan_Cell_Stress_UPR	0.282843	GWI higher
Oligodendrocyte	Pan_Chemokine	0	Ctrl higher
Oligodendrocyte	Pan_Complement	-0.157135	Ctrl higher
Oligodendrocyte	Pan_Cytokine	0.385695	GWI higher
Oligodendrocyte	Pan_IEG_Activity_Response	-0.848528	Ctrl higher
Oligodendrocyte	Pan_Inflammatory_Signaling	-0.141421	Ctrl higher
Oligodendrocyte	Pan_Interferon_Response	-1.11022e-17	Ctrl higher
Oligodendrocyte	Pan_Lipid_Metabolism	0.642824	GWI higher
Oligodendrocyte	Pan_Mitochondrial_OxPhos	0.0942809	GWI higher
Oligodendrocyte	Pan_NFkB_Signaling	0.117851	GWI higher
Oligodendrocyte	Pan_Oxidative_Stress	-0.176777	Ctrl higher
OPC	Differentiation	0.157135	GWI higher
OPC	OPC_Identity	0.157135	GWI higher
OPC	Pan_Apoptosis_Survival	-0.565685	Ctrl higher
OPC	Pan_Cell_Stress_UPR	-0.141421	Ctrl higher
OPC	Pan_Chemokine	0.282843	GWI higher
OPC	Pan_Complement	0.785674	GWI higher
OPC	Pan_Cytokine	0.642824	GWI higher
OPC	Pan_IEG_Activity_Response	0.707107	GWI higher
OPC	Pan_Inflammatory_Signaling	-0.141421	Ctrl higher
OPC	Pan_Interferon_Response	0.707107	GWI higher
OPC	Pan_Lipid_Metabolism	-3.02788e-17	Ctrl higher
OPC	Pan_Mitochondrial_OxPhos	0.282843	GWI higher
OPC	Pan_NFkB_Signaling	-9.25186e-18	Ctrl higher
OPC	Pan_Oxidative_Stress	0.0883883	GWI higher
OPC	Proliferation	0	Ctrl higher
OPC	Stress_Quiescence	-0.157135	Ctrl higher
Endothelial	BBB_Tight_Junction	0.785674	GWI higher
Endothelial	Inflammation_Activation	-0.883883	Ctrl higher
Endothelial	Pan_Apoptosis_Survival	0.565685	GWI higher
Endothelial	Pan_Cell_Stress_UPR	0.282843	GWI higher
Endothelial	Pan_Chemokine	0.141421	GWI higher
Endothelial	Pan_Complement	0.628539	GWI higher
Endothelial	Pan_Cytokine	-0.25713	Ctrl higher
Endothelial	Pan_IEG_Activity_Response	-0.141421	Ctrl higher
Endothelial	Pan_Inflammatory_Signaling	0.141421	GWI higher
Endothelial	Pan_Interferon_Response	0.707107	GWI higher
Endothelial	Pan_Lipid_Metabolism	0.128565	GWI higher
Endothelial	Pan_Mitochondrial_OxPhos	-0.0942809	Ctrl higher
Endothelial	Pan_NFkB_Signaling	2.77556e-17	GWI higher
Endothelial	Pan_Oxidative_Stress	0.707107	GWI higher
Endothelial	Transport_Efflux	-0.471405	Ctrl higher
Pericyte	Contractile_Function	0.202031	GWI higher
Pericyte	ECM_Basement_Membrane	1.23358e-17	GWI higher
Pericyte	Pan_Apoptosis_Survival	-0.848528	Ctrl higher
Pericyte	Pan_Cell_Stress_UPR	-0.565685	Ctrl higher
Pericyte	Pan_Chemokine	-0.282843	Ctrl higher
Pericyte	Pan_Complement	0.785674	GWI higher
Pericyte	Pan_Cytokine	-0.25713	Ctrl higher
Pericyte	Pan_IEG_Activity_Response	-0.707107	Ctrl higher
Pericyte	Pan_Inflammatory_Signaling	0.282843	GWI higher
Pericyte	Pan_Interferon_Response	0.141421	GWI higher
Pericyte	Pan_Lipid_Metabolism	0.128565	GWI higher
Pericyte	Pan_Mitochondrial_OxPhos	-0.188562	Ctrl higher
Pericyte	Pan_NFkB_Signaling	0.589256	GWI higher
Pericyte	Pan_Oxidative_Stress	0.441942	GWI higher
Pericyte	Pericyte_Identity	1.09994	GWI higher
