# Supplementary material
Source: Research Square preprint supplement (doi:10.21203/rs.3.rs-10072088/v1)
Supplement: Supplementary file 2 [file 1a7f2c9919ff9393c5f95d5d.xlsx]

## Sheet: CBD-Down_Up_DEG_GO BP
CBD effects: Microglia GWI_LPS_UpDEG-GO:BP based on P < 0.05, |log₂FC| > 0.5							CBD effects: Microglia GWI_LPS_DownDEG-GO:BP based on Padj < 0.05, |log₂FC| > 0.5
ID	Description	FoldEnrichment	pvalue	p.adjust	geneID		ID	Description	FoldEnrichment	pvalue	p.adjust	geneID
GO:0007059	chromosome segregation	3.30217	8.95471e-22	4.04037e-18	Ncaph/Ccne2/Ccne1/Klhdc8b/Kntc1/Spdl1/Cdk1/Ndc80/Cenpm/Tpx2/Esco2/Mad2l1/Brca2/Cit/Cdc6/Aurkb/Lzts2/Bcl7a/Fancd2/Pmf1/Cenpk/Top2a/Cdca2/Zwilch/Nuf2/Kif15/Mybl2/Uhrf1/Dlgap5/Brip1/Bub1b/Stil/Ect2/Brca1/Spc24/Syce2/Rmi2/Bub1/Cdca8/Cenph/Oip5/Nsl1/Smc2/Tacc3/Diaph3/Cenpf/Cenpn/Tubb5/Kash5/Birc5/Dsn1/Sgo1/Ncapg2/Kif22/Chek2/Mki67/Nek2/Prc1/Racgap1/Iho1/Trip13/Spc25/Ncapd2/Ncapg/Nusap1/Ska1/Ska3/Rad18…		GO:0042254	ribosome biogenesis	4.82968	1.40851e-08	2.23698e-05	Ppan/Aatf/Grwd1/Wdr12/Ddx21/Ltv1/Wdr75/Mrto4/Mphosph10/Utp4/Nsun5/Rrp9/Nle1/Rpp40/Nop56/Rrs1/Noc2l/Nop2/Sdad1
GO:0098813	nuclear chromosome segregation	3.64911	7.22639e-20	1.63027e-16	Ncaph/Ccne2/Ccne1/Klhdc8b/Kntc1/Spdl1/Cdk1/Ndc80/Tpx2/Mad2l1/Brca2/Cit/Cdc6/Aurkb/Bcl7a/Fancd2/Pmf1/Cenpk/Top2a/Zwilch/Nuf2/Kif15/Mybl2/Uhrf1/Brip1/Bub1b/Ect2/Spc24/Syce2/Rmi2/Bub1/Cdca8/Nsl1/Smc2/Tacc3/Cenpf/Kash5/Birc5/Dsn1/Sgo1/Ncapg2/Kif22/Chek2/Nek2/Prc1/Racgap1/Iho1/Trip13/Spc25/Ncapd2/Ncapg/Nusap1/Ska1/Ska3/Aurka/Cenpi/Mlh3/Kif4/Gen1/Ccnb1/Psrc1/Kif18b/Kif23		GO:0006399	tRNA metabolic process	6.24668	1.73141e-08	2.23698e-05	Trmt61a/Yars1/Polr3d/Ears2/Mars1/Wdr4/Farsb/Tars1/Zcchc7/Alkbh1/Trmt10c/Rpp40/Dus3l/Rtcb/Mettl1
GO:0000280	nuclear division	3.04628	1.24248e-17	1.86869e-14	Ncaph/Ccne2/Ccne1/Klhdc8b/Kntc1/Cav2/Spdl1/Cdk1/Rad51/Ndc80/Rad51ap1/Tpx2/Mad2l1/Brca2/Ywhah/Cit/Aurkb/Fancd2/Cenpk/Top2a/Cdca2/Zwilch/Nuf2/Kif15/Mybl2/Uhrf1/Rad54l/Brip1/Bub1b/Spc24/Cul7/Syce2/Bub1/Cdca8/Nsl1/Smc2/Chek1/Kash5/Birc5/Sgo1/Fignl1/Cdkn1c/Ncapg2/Kif22/Chek2/Mki67/Rad54b/Nek2/Prc1/Racgap1/Iho1/Trip13/Spc25/Ncapd2/Ncapg/Nusap1/Ska1/Ska3/Aurka/Cenpi/Rspo1/Brme1/Mlh3/Kif4/Gen1/Eme1/Ccnb1…		GO:0022613	ribonucleoprotein complex biogenesis	3.54261	9.06423e-07	0.000656162	Ppan/Aatf/Grwd1/Wdr12/Ddx21/Ltv1/Wdr75/Mrto4/Mphosph10/Utp4/Nsun5/Rrp9/Nle1/Rpp40/Nop56/Rrs1/Noc2l/Nopchap1/Nop2/Sdad1
GO:0048285	organelle fission	2.67211	9.90033e-15	1.11676e-11	Ncaph/Ccne2/Ccne1/Klhdc8b/Kntc1/Cav2/Spdl1/Cdk1/Rad51/Ndc80/Rad51ap1/Tpx2/Mad2l1/Brca2/Ywhah/Cit/Aurkb/Fancd2/Cenpk/Top2a/Cdca2/Zwilch/Nuf2/Kif15/Mybl2/Uhrf1/Rad54l/Brip1/Bub1b/Spc24/Cul7/Syce2/Bub1/Cdca8/Nsl1/Smc2/Chek1/Kash5/Birc5/Sgo1/Fignl1/Cdkn1c/Ncapg2/Kif22/Chek2/Mki67/Rad54b/Nek2/Prc1/Racgap1/Iho1/Trip13/Spc25/Ncapd2/Mapt/Ncapg/Nusap1/Ska1/Ska3/Aurka/Cenpi/Rspo1/Brme1/Mlh3/Kif4/Gen1/Eme1/…		GO:0016064	immunoglobulin mediated immune response	7.31698	1.06958e-06	0.000656162	Bcl3/Myd88/Il4ra/Fcgr4/Fcgr2b/Bcl6/Csf2rb/Csf2rb2/Batf/Fcgr3
GO:0000819	sister chromatid segregation	3.54538	1.32473e-14	1.19544e-11	Ncaph/Kntc1/Spdl1/Cdk1/Ndc80/Tpx2/Mad2l1/Cit/Cdc6/Aurkb/Bcl7a/Cenpk/Top2a/Zwilch/Nuf2/Kif15/Mybl2/Uhrf1/Bub1b/Spc24/Rmi2/Bub1/Cdca8/Nsl1/Smc2/Tacc3/Birc5/Ncapg2/Kif22/Chek2/Nek2/Prc1/Racgap1/Trip13/Spc25/Ncapd2/Ncapg/Nusap1/Ska1/Ska3/Cenpi/Kif4/Gen1/Ccnb1/Psrc1/Kif18b/Kif23		GO:0019724	B cell mediated immunity	7.18272	1.26966e-06	0.000656162	Bcl3/Myd88/Il4ra/Fcgr4/Fcgr2b/Bcl6/Csf2rb/Csf2rb2/Batf/Fcgr3
GO:0000070	mitotic sister chromatid segregation	3.78426	3.23262e-14	2.43093e-11	Ncaph/Kntc1/Spdl1/Cdk1/Ndc80/Tpx2/Mad2l1/Cit/Aurkb/Cenpk/Zwilch/Nuf2/Kif15/Mybl2/Uhrf1/Bub1b/Spc24/Bub1/Cdca8/Nsl1/Smc2/Birc5/Ncapg2/Kif22/Chek2/Nek2/Prc1/Racgap1/Trip13/Spc25/Ncapd2/Ncapg/Nusap1/Ska1/Ska3/Cenpi/Kif4/Gen1/Ccnb1/Psrc1/Kif18b/Kif23		GO:0042273	ribosomal large subunit biogenesis	9.6359	1.62947e-06	0.000701759	Ppan/Wdr12/Mrto4/Nle1/Rrs1/Noc2l/Nop2/Sdad1
GO:0140014	mitotic nuclear division	3.24365	4.27418e-14	2.75501e-11	Ncaph/Klhdc8b/Kntc1/Cav2/Spdl1/Cdk1/Ndc80/Tpx2/Mad2l1/Ywhah/Cit/Aurkb/Cenpk/Cdca2/Zwilch/Nuf2/Kif15/Mybl2/Uhrf1/Bub1b/Spc24/Cul7/Bub1/Cdca8/Nsl1/Smc2/Chek1/Birc5/Cdkn1c/Ncapg2/Kif22/Chek2/Mki67/Nek2/Prc1/Racgap1/Trip13/Spc25/Ncapd2/Ncapg/Nusap1/Ska1/Ska3/Aurka/Cenpi/Kif4/Gen1/Ccnb1/Psrc1/Kif18b/Kif23		GO:0016072	rRNA metabolic process	4.40194	3.70837e-06	0.00136892	Ppan/Wdr12/Ddx21/Mars1/Wdr75/Mrto4/Mphosph10/Utp4/Nsun5/Myc/Rrp9/Rpp40/Rrs1/Nop2
GO:0051276	chromosome organization	2.38796	3.06819e-12	1.73046e-09	Ncaph/Ccne2/Ccne1/Kntc1/Spdl1/Cdk1/Rad51/Ndc80/Tpx2/Esco2/Mad2l1/Brca2/Cit/Cdc6/Aurkb/Bcl7a/Fancd2/Cenpk/Top2a/Zwilch/Dscc1/Pcna/Nuf2/Kif15/Mybl2/Uhrf1/Dlgap5/Rad54l/Brip1/Bub1b/Spc24/Syce2/Rmi2/Bub1/Cdca8/Cenph/Oip5/Nsl1/Smc2/Tacc3/Src/Cenpn/Kash5/Birc5/Sgo1/Mis18bp1/Ncapg2/Kif22/Chek2/Nek2/Prc1/Racgap1/Prkcq/Iho1/Trip13/Spc25/Ncapd2/Lrrc34/Ncapg/Nusap1/Ska1/Ska3/Cenpi/Mlh3/Pml/Kif4/Gen1/Ccnb1/P…		GO:0002460	adaptive immune response based on somatic recombination of immune receptors built from immunoglobulin superfamily domains	4.04957	4.59787e-06	0.00136931	Bcl3/Myd88/Il4ra/Arid5a/Fcgr4/Gadd45g/Fcgr2b/Rab27a/Bcl6/Csf2rb/C3ar1/Rftn1/Csf2rb2/Batf/Fcgr3
GO:0051983	regulation of chromosome segregation	4.05456	1.13886e-11	5.70947e-09	Ncaph/Kntc1/Spdl1/Cdk1/Ndc80/Mad2l1/Cit/Cdc6/Aurkb/Bcl7a/Zwilch/Nuf2/Bub1b/Spc24/Rmi2/Bub1/Cdca8/Smc2/Tacc3/Birc5/Ncapg2/Iho1/Trip13/Spc25/Ncapd2/Ncapg/Ska1/Ska3/Rad18/Gen1/Ccnb1		GO:0001819	positive regulation of cytokine production	3.30565	4.76926e-06	0.00136931	C5ar1/Bcl3/Cd244a/Myd88/Il4ra/Arid5a/Runx1/Polr3d/Ddx21/Fcgr2b/Gpr65/Slc7a5/P2ry2/Arrdc4/C3ar1/Rftn1/Batf/Cebpb/Fcgr3
GO:1905818	regulation of chromosome separation	5.2538	1.70295e-11	7.68371e-09	Ncaph/Kntc1/Spdl1/Ndc80/Mad2l1/Aurkb/Zwilch/Nuf2/Bub1b/Spc24/Bub1/Cdca8/Smc2/Birc5/Ncapg2/Trip13/Spc25/Ncapd2/Ncapg/Ska1/Ska3/Gen1/Ccnb1		GO:0002449	lymphocyte mediated immunity	4.26492	5.34874e-06	0.00138212	Bcl3/Myd88/Il4ra/Arid5a/Fcgr4/Fcgr2b/Rab27a/Il18rap/Bcl6/Csf2rb/Rftn1/Csf2rb2/Batf/Fcgr3
GO:0051304	chromosome separation	4.80541	5.20963e-11	2.13689e-08	Ncaph/Kntc1/Spdl1/Ndc80/Mad2l1/Aurkb/Top2a/Zwilch/Nuf2/Bub1b/Spc24/Bub1/Cdca8/Smc2/Birc5/Ncapg2/Trip13/Spc25/Ncapd2/Ncapg/Ska1/Ska3/Gen1/Ccnb1		GO:0042274	ribosomal small subunit biogenesis	6.64741	8.30628e-06	0.00184758	Aatf/Ltv1/Wdr75/Mphosph10/Utp4/Rrp9/Rpp40/Nop56/Rrs1
GO:0007094	mitotic spindle assembly checkpoint signaling	6.21124	1.15239e-10	3.714e-08	Kntc1/Spdl1/Ndc80/Mad2l1/Aurkb/Zwilch/Nuf2/Bub1b/Spc24/Bub1/Cdca8/Birc5/Trip13/Spc25/Ska1/Ska3/Gen1/Ccnb1		GO:0002443	leukocyte mediated immunity	3.63092	8.78645e-06	0.00184758	Bcl3/Myd88/Il4ra/Arid5a/Fcgr4/Ddx21/Fcgr2b/Rab27a/Il18rap/Bcl6/Csf2rb/Rftn1/Csf2rb2/Batf/Hmox1/Fcgr3
GO:0071173	spindle assembly checkpoint signaling	6.21124	1.15239e-10	3.714e-08	Kntc1/Spdl1/Ndc80/Mad2l1/Aurkb/Zwilch/Nuf2/Bub1b/Spc24/Bub1/Cdca8/Birc5/Trip13/Spc25/Ska1/Ska3/Gen1/Ccnb1		GO:0002250	adaptive immune response	3.43917	9.29509e-06	0.00184758	Bcl3/Cd244a/Myd88/Il4ra/Arid5a/Fcgr4/Gadd45g/Fcgr2b/Rab27a/Il18rap/Bcl6/Csf2rb/C3ar1/Rftn1/Csf2rb2/Batf/Fcgr3
GO:0071174	mitotic spindle checkpoint signaling	6.21124	1.15239e-10	3.714e-08	Kntc1/Spdl1/Ndc80/Mad2l1/Aurkb/Zwilch/Nuf2/Bub1b/Spc24/Bub1/Cdca8/Birc5/Trip13/Spc25/Ska1/Ska3/Gen1/Ccnb1		GO:0009451	RNA modification	5.47494	1.46585e-05	0.00270553	Trmt61a/Pus7l/Wdr4/Apobec3/Nsun5/Alkbh1/Trmt10c/Dus3l/Nop2/Mettl1
GO:0031577	spindle checkpoint signaling	6.08184	1.73871e-10	5.23004e-08	Kntc1/Spdl1/Ndc80/Mad2l1/Aurkb/Zwilch/Nuf2/Bub1b/Spc24/Bub1/Cdca8/Birc5/Trip13/Spc25/Ska1/Ska3/Gen1/Ccnb1		GO:0006364	rRNA processing	4.4316	1.75453e-05	0.00302246	Ppan/Wdr12/Ddx21/Wdr75/Mrto4/Mphosph10/Utp4/Nsun5/Rrp9/Rpp40/Rrs1/Nop2
GO:0033046	negative regulation of sister chromatid segregation	5.95772	2.59162e-10	6.15441e-08	Kntc1/Spdl1/Ndc80/Mad2l1/Aurkb/Zwilch/Nuf2/Bub1b/Spc24/Bub1/Cdca8/Birc5/Trip13/Spc25/Ska1/Ska3/Gen1/Ccnb1		GO:0002274	myeloid leukocyte activation	4.04957	4.2709e-05	0.00689751	C5ar1/Cd244a/Myd88/Il4ra/Fcgr4/Rbpj/Sbno2/Il18rap/Cd300lf/Batf/Hmox1/Fcgr3
GO:0033048	negative regulation of mitotic sister chromatid segregation	5.95772	2.59162e-10	6.15441e-08	Kntc1/Spdl1/Ndc80/Mad2l1/Aurkb/Zwilch/Nuf2/Bub1b/Spc24/Bub1/Cdca8/Birc5/Trip13/Spc25/Ska1/Ska3/Gen1/Ccnb1		GO:0045064	T-helper 2 cell differentiation	16.4825	8.56918e-05	0.0130252	Bcl3/Il4ra/Bcl6/Batf
GO:0045841	negative regulation of mitotic metaphase/anaphase transition	5.95772	2.59162e-10	6.15441e-08	Kntc1/Spdl1/Ndc80/Mad2l1/Aurkb/Zwilch/Nuf2/Bub1b/Spc24/Bub1/Cdca8/Birc5/Trip13/Spc25/Ska1/Ska3/Gen1/Ccnb1		GO:0046631	alpha-beta T cell activation	4.39841	9.52372e-05	0.0136718	Bcl3/Cd244a/Il4ra/Runx1/Gadd45g/Gpr65/Myc/Bcl6/Batf/Cebpb
GO:2000816	negative regulation of mitotic sister chromatid separation	5.95772	2.59162e-10	6.15441e-08	Kntc1/Spdl1/Ndc80/Mad2l1/Aurkb/Zwilch/Nuf2/Bub1b/Spc24/Bub1/Cdca8/Birc5/Trip13/Spc25/Ska1/Ska3/Gen1/Ccnb1		GO:0042832	defense response to protozoan	10.0374	0.000129771	0.0176488	Bcl3/Myd88/Il4ra/Gbp7/Batf
GO:0006261	DNA-templated DNA replication	3.50665	3.12818e-10	7.05717e-08	Tk1/Ccne2/Prim2/Rfc3/Ccne1/Lig1/Cdk1/Rad51/Cdc45/Brca2/Cdc6/Pcna/Exo1/Mms22l/Brca1/Prim1/Mcm10/E2f8/Mcm7/Zranb3/Gmnn/Pola1/Ticrr/Orc1/Mcm5/Atad5/Mcm3/E2f7/Gen1/Eme1/Pole2/Cenps		GO:0001562	response to protozoan	9.54776	0.000165465	0.0203601	Bcl3/Myd88/Il4ra/Gbp7/Batf
GO:0007093	mitotic cell cycle checkpoint signaling	3.65825	3.78314e-10	7.17897e-08	Kntc1/Spdl1/Cdk1/Ndc80/Mad2l1/Cdc6/Aurkb/Fancd2/Zwilch/Nuf2/Dtl/Bub1b/Brca1/Spc24/Bub1/Cdca8/Chek1/Birc5/D7Ertd443e/Chek2/Ticrr/Trip13/Orc1/Spc25/Clspn/Ska1/Ska3/Gen1/Eme1/Ccnb1		GO:0006418	tRNA aminoacylation for protein translation	9.54776	0.000165465	0.0203601	Yars1/Ears2/Mars1/Farsb/Tars1
GO:0008608	attachment of spindle microtubules to kinetochore	5.83857	3.8186e-10	7.17897e-08	Cdk1/Ndc80/Aurkb/Pmf1/Nuf2/Ect2/Spc24/Cdca8/Nsl1/Birc5/Dsn1/Sgo1/Nek2/Racgap1/Spc25/Ska1/Ska3/Ccnb1		GO:0002366	leukocyte activation involved in immune response	3.47963	0.000180959	0.0208512	Bcl3/Cd244a/Myd88/Il4ra/Fcgr4/Gadd45g/Sbno2/Rab27a/Gpr65/Bcl6/Batf/Hmox1
GO:1902100	negative regulation of metaphase/anaphase transition of cell cycle	5.83857	3.8186e-10	7.17897e-08	Kntc1/Spdl1/Ndc80/Mad2l1/Aurkb/Zwilch/Nuf2/Bub1b/Spc24/Bub1/Cdca8/Birc5/Trip13/Spc25/Ska1/Ska3/Gen1/Ccnb1		GO:0032740	positive regulation of interleukin-17 production	13.6159	0.000188117	0.0208512	Myd88/Arid5a/Slc7a5/Rftn1
GO:1905819	negative regulation of chromosome separation	5.83857	3.8186e-10	7.17897e-08	Kntc1/Spdl1/Ndc80/Mad2l1/Aurkb/Zwilch/Nuf2/Bub1b/Spc24/Bub1/Cdca8/Birc5/Trip13/Spc25/Ska1/Ska3/Gen1/Ccnb1		GO:0002263	cell activation involved in immune response	3.42883	0.000207364	0.0208512	Bcl3/Cd244a/Myd88/Il4ra/Fcgr4/Gadd45g/Sbno2/Rab27a/Gpr65/Bcl6/Batf/Hmox1
GO:0033047	regulation of mitotic sister chromatid segregation	5.50262	4.02697e-10	7.26787e-08	Kntc1/Spdl1/Cdk1/Ndc80/Mad2l1/Aurkb/Zwilch/Nuf2/Bub1b/Spc24/Bub1/Cdca8/Birc5/Trip13/Spc25/Ska1/Ska3/Gen1/Ccnb1		GO:0001510	RNA methylation	7.01119	0.000208077	0.0208512	Trmt61a/Wdr4/Nsun5/Trmt10c/Nop2/Mettl1
GO:0006270	DNA replication initiation	7.56852	5.91895e-10	9.57571e-08	Ccne2/Prim2/Ccne1/Cdc45/Cdc6/Prim1/Mcm10/Mcm7/Gmnn/Pola1/Ticrr/Orc1/Mcm5/Mcm3		GO:0035710	CD4-positive, alpha-beta T cell activation	4.9709	0.000209803	0.0208512	Bcl3/Il4ra/Runx1/Gadd45g/Gpr65/Bcl6/Batf/Cebpb
GO:0051984	positive regulation of chromosome segregation	7.56852	5.91895e-10	9.57571e-08	Ncaph/Cdk1/Cdc6/Aurkb/Cdca8/Smc2/Birc5/Ncapg2/Ncapd2/Ncapg/Ska1/Ska3/Rad18/Ccnb1		GO:0008033	tRNA processing	4.93176	0.000221509	0.0211993	Trmt61a/Wdr4/Alkbh1/Trmt10c/Rpp40/Dus3l/Rtcb/Mettl1
GO:0006260	DNA replication	2.7659	5.94237e-10	9.57571e-08	Tk1/Ccne2/Prim2/Rfc3/Ccne1/Lig1/Cdk1/Rad51/Cdc45/Esco2/Brca2/Cdc6/Chaf1b/Dscc1/Pcna/Pclaf/Exo1/Dtl/Ccna2/Mms22l/Brca1/Rmi2/Prim1/Adra2a/Mcm10/Chaf1a/E2f8/Mcm7/Zranb3/Gmnn/Pola1/Ticrr/Mcm8/Orc1/Rpa3/Mcm5/Atad5/Mcm3/Gins2/E2f7/Gen1/Eme1/Pole2/Cenps		GO:0043039	tRNA aminoacylation	8.89678	0.000232499	0.0214563	Yars1/Ears2/Mars1/Farsb/Tars1
GO:0051985	negative regulation of chromosome segregation	5.61401	8.02642e-10	1.2488e-07	Kntc1/Spdl1/Ndc80/Mad2l1/Aurkb/Zwilch/Nuf2/Bub1b/Spc24/Bub1/Cdca8/Birc5/Trip13/Spc25/Ska1/Ska3/Gen1/Ccnb1		GO:0043038	amino acid activation	8.69907	0.000258885	0.0219506	Yars1/Ears2/Mars1/Farsb/Tars1
GO:1903046	meiotic cell cycle process	3.17117	8.43816e-10	1.2691e-07	Ncaph/Ccne2/Ccne1/Pkmyt1/Rad51/Ndc80/Rad51ap1/Brca2/Fancd2/Top2a/Nuf2/Rad54l/Brip1/Syce2/Smc2/Kash5/Birc5/Mcm7/Sgo1/Fignl1/Rad54b/Iho1/Trip13/Ncapd2/Ska1/Ednra/Mcm5/Ska3/Mcm3/Aurka/Rspo1/Brme1/Mlh3/Eme1/Cenps		GO:1902622	regulation of neutrophil migration	8.69907	0.000258885	0.0219506	C5ar1/Myd88/C3ar1/Ripor2/C5ar2
GO:0007346	regulation of mitotic cell cycle	2.24068	1.07996e-09	1.5663e-07	Ak1/Ccne2/Ccne1/Pkmyt1/Kntc1/Cav2/Spdl1/Cdk1/Rad51b/Ndc80/E2f1/Mad2l1/Brca2/Ywhah/Cdc6/Aurkb/Bcl7a/Fancd2/Cdkn2c/Cdca2/Zwilch/Ttc28/Nuf2/Dtl/Dlgap5/Bub1b/Aif1/Stil/Brca1/Spc24/Cul7/Rbl1/Bub1/Cdca8/Rrm2/Ezh2/Chek1/Cenpf/Birc5/D7Ertd443e/Cdkn1c/Gmnn/Chek2/Mki67/Ctdspl/Prkcq/Ticrr/Trip13/Orc1/Rpa3/Spc25/Clspn/Nusap1/Ska1/Atad5/Ska3/Aurka/E2f7/Pml/Foxm1/Gen1/Eme1/Ccnb1		GO:0002444	myeloid leukocyte mediated immunity	5.53577	0.000271834	0.0219506	Myd88/Il4ra/Fcgr4/Ddx21/Fcgr2b/Hmox1/Fcgr3
GO:0045839	negative regulation of mitotic nuclear division	5.22283	1.11085e-09	1.5663e-07	Kntc1/Spdl1/Ndc80/Mad2l1/Aurkb/Zwilch/Nuf2/Bub1b/Spc24/Bub1/Cdca8/Chek1/Birc5/Trip13/Spc25/Ska1/Ska3/Gen1/Ccnb1		GO:1990266	neutrophil migration	5.53577	0.000271834	0.0219506	C5ar1/Myd88/Gpr35/C3ar1/Ripor2/Fcgr3/C5ar2
GO:0051784	negative regulation of nuclear division	4.97011	2.85422e-09	3.9025e-07	Kntc1/Spdl1/Ndc80/Mad2l1/Aurkb/Zwilch/Nuf2/Bub1b/Spc24/Bub1/Cdca8/Chek1/Birc5/Trip13/Spc25/Ska1/Ska3/Gen1/Ccnb1		GO:0043367	CD4-positive, alpha-beta T cell differentiation	5.48042	0.000289197	0.022645	Bcl3/Il4ra/Runx1/Gadd45g/Gpr65/Bcl6/Batf
GO:0033045	regulation of sister chromatid segregation	3.97182	3.80015e-09	5.04302e-07	Kntc1/Spdl1/Cdk1/Ndc80/Mad2l1/Cit/Cdc6/Aurkb/Bcl7a/Zwilch/Nuf2/Bub1b/Spc24/Rmi2/Bub1/Cdca8/Tacc3/Birc5/Trip13/Spc25/Ska1/Ska3/Gen1/Ccnb1		GO:0002430	complement receptor mediated signaling pathway	19.5729	0.000413723	0.0306191	C5ar1/C3ar1/C5ar2
GO:0007088	regulation of mitotic nuclear division	3.78931	5.12377e-09	6.60527e-07	Kntc1/Cav2/Spdl1/Ndc80/Mad2l1/Ywhah/Aurkb/Cdca2/Zwilch/Nuf2/Bub1b/Spc24/Cul7/Bub1/Cdca8/Chek1/Birc5/Mki67/Trip13/Spc25/Nusap1/Ska1/Ska3/Gen1/Ccnb1		GO:0030593	neutrophil chemotaxis	6.18092	0.000414732	0.0306191	C5ar1/Gpr35/C3ar1/Ripor2/Fcgr3/C5ar2
GO:0044786	cell cycle DNA replication	6.08184	5.85893e-09	7.25986e-07	Tk1/Lig1/Cdk1/Rad51/Cdc45/Brca2/Pcna/E2f8/Mcm7/Gmnn/Pola1/Mcm5/Atad5/Mcm3/E2f7		GO:0008630	intrinsic apoptotic signaling pathway in response to DNA damage	5.07446	0.000462624	0.0316142	Bcl3/Aen/Nupr1/Mcl1/Myc/Ddit4/Hmox1
GO:0010965	regulation of mitotic sister chromatid separation	5.03325	5.95334e-09	7.25986e-07	Kntc1/Spdl1/Ndc80/Mad2l1/Aurkb/Zwilch/Nuf2/Bub1b/Spc24/Bub1/Cdca8/Birc5/Trip13/Spc25/Ska1/Ska3/Gen1/Ccnb1		GO:0002293	alpha-beta T cell differentiation involved in immune response	6.02244	0.000477149	0.0316142	Bcl3/Il4ra/Gadd45g/Gpr65/Bcl6/Batf
GO:0044772	mitotic cell cycle phase transition	2.24379	6.59694e-09	7.833e-07	Ccni/Ak1/Ccne2/Tcf19/Ccne1/Pkmyt1/Kntc1/Spdl1/Cdk1/Rad51b/Ccng2/Ndc80/E2f1/Mad2l1/Cit/Cdc6/Aurkb/Bcl7a/Cdkn2c/Zwilch/Nuf2/Dtl/Ccna2/Bub1b/Aif1/Stil/Brca1/Spc24/Rbl1/Bub1/Cdca8/Rrm2/Ezh2/Fbxl7/Tacc3/Chek1/Cenpf/Birc5/Nes/D7Ertd443e/Cdkn1c/Myb/Chek2/Ctdspl/Prkcq/Ticrr/Trip13/Orc1/Spc25/Clspn/Ska1/Atad5/Ska3/E2f7/Foxm1/Gen1/Ccnb1		GO:0002294	CD4-positive, alpha-beta T cell differentiation involved in immune response	6.02244	0.000477149	0.0316142	Bcl3/Il4ra/Gadd45g/Gpr65/Bcl6/Batf
GO:1901988	negative regulation of cell cycle phase transition	2.69183	8.09918e-09	9.37013e-07	Pkmyt1/Kntc1/Spdl1/Cdk1/Rad51/Ndc80/E2f1/Mad2l1/Brca2/Cdc6/Aurkb/Apbb1/Fancd2/Zwilch/Nuf2/Dtl/Bub1b/Brca1/Spc24/Rbl1/Bub1/Cdca8/Gpr15lg/Ezh2/Chek1/Birc5/D7Ertd443e/Chek2/Ctdspl/Ticrr/Trip13/Orc1/Spc25/Clspn/Ska1/Ska3/E2f7/Gen1/Eme1/Ccnb1		GO:0042093	T-helper cell differentiation	6.02244	0.000477149	0.0316142	Bcl3/Il4ra/Gadd45g/Gpr65/Bcl6/Batf
GO:0090068	positive regulation of cell cycle process	2.72634	8.64757e-09	9.75446e-07	Ncaph/Sox15/Ccne2/Ccne1/Cdk1/Rad51b/Ndc80/Rad51ap1/Mad2l1/Cit/Cdc6/Aurkb/Dtl/Aif1/Stil/Ect2/Bub1/Cdca8/Rrm2/Ezh2/Smc2/Chek1/Birc5/E2f8/Ncapg2/Chek2/Racgap1/Orc1/Ncapd2/Ncapg/Nusap1/Ska1/Atad5/Ska3/Rad18/E2f7/Gen1/Ccnb1/Kif23		GO:0002287	alpha-beta T cell activation involved in immune response	5.9462	0.000510981	0.0330094	Bcl3/Il4ra/Gadd45g/Gpr65/Bcl6/Batf
GO:0051321	meiotic cell cycle	2.71464	9.78747e-09	1.0771e-06	Ncaph/Ccne2/Ccne1/Pkmyt1/Rad51/Ndc80/Rad51ap1/Brca2/Fancd2/Top2a/Exo1/Nuf2/Rad54l/Brip1/Syce2/Smc2/Kash5/Birc5/Mcm7/Sgo1/Fignl1/Mns1/Mki67/Rad54b/Nek2/Iho1/Trip13/Ncapd2/Ska1/Ednra/Mcm5/Ska3/Mcm3/Aurka/Rspo1/Brme1/Mlh3/Eme1/Cenps		GO:0002323	natural killer cell activation involved in immune response	18.0673	0.000532805	0.0334099	Cd244a/Fcgr4/Rab27a
GO:0000075	cell cycle checkpoint signaling	3.00675	1.03637e-08	1.11336e-06	Kntc1/Spdl1/Cdk1/Rad51/Ndc80/E2f1/Mad2l1/Brca2/Cdc6/Aurkb/Fancd2/Zwilch/Nuf2/Dtl/Bub1b/Brca1/Spc24/Bub1/Cdca8/Chek1/Birc5/D7Ertd443e/Chek2/Ticrr/Trip13/Orc1/Spc25/Clspn/Ska1/Ska3/Gen1/Eme1/Ccnb1		GO:0090022	regulation of neutrophil chemotaxis	10.4389	0.000543041	0.0334099	C5ar1/C3ar1/Ripor2/C5ar2
GO:0045930	negative regulation of mitotic cell cycle	2.79105	1.09355e-08	1.14746e-06	Pkmyt1/Kntc1/Spdl1/Cdk1/Ndc80/Mad2l1/Cdc6/Aurkb/Fancd2/Zwilch/Nuf2/Dtl/Bub1b/Brca1/Spc24/Rbl1/Bub1/Cdca8/Ezh2/Chek1/Birc5/D7Ertd443e/Cdkn1c/Chek2/Ctdspl/Ticrr/Trip13/Orc1/Spc25/Clspn/Ska1/Ska3/E2f7/Pml/Gen1/Eme1/Ccnb1		GO:0031100	animal organ regeneration	7.38601	0.000560103	0.0336583	Lifr/Slc7a5/Atic/Hmox1/Cebpb
GO:0007091	metaphase/anaphase transition of mitotic cell cycle	4.00901	1.40823e-08	1.44408e-06	Kntc1/Spdl1/Ndc80/Mad2l1/Cit/Cdc6/Aurkb/Bcl7a/Zwilch/Nuf2/Bub1b/Spc24/Bub1/Cdca8/Tacc3/Birc5/Trip13/Spc25/Ska1/Ska3/Gen1/Ccnb1		GO:0002286	T cell activation involved in immune response	4.84993	0.000607586	0.0356819	Bcl3/Il4ra/Gadd45g/Rab27a/Gpr65/Bcl6/Batf
GO:0051306	mitotic sister chromatid separation	4.78571	1.45626e-08	1.46015e-06	Kntc1/Spdl1/Ndc80/Mad2l1/Aurkb/Zwilch/Nuf2/Bub1b/Spc24/Bub1/Cdca8/Birc5/Trip13/Spc25/Ska1/Ska3/Gen1/Ccnb1		GO:0038094	Fc-gamma receptor signaling pathway	16.7768	0.000671771	0.0385746	Fcgr4/Fcgr2b/Fcgr3
GO:0051310	metaphase chromosome alignment	3.84556	1.55705e-08	1.52267e-06	Spdl1/Cdk1/Ndc80/Brca2/Aurkb/Pmf1/Nuf2/Ect2/Spc24/Cdca8/Nsl1/Cenpf/Birc5/Dsn1/Sgo1/Kif22/Nek2/Racgap1/Spc25/Ska1/Ska3/Ccnb1/Psrc1		GO:0002292	T cell differentiation involved in immune response	5.52647	0.00075501	0.0424118	Bcl3/Il4ra/Gadd45g/Gpr65/Bcl6/Batf
GO:1901991	negative regulation of mitotic cell cycle phase transition	3.01735	1.58611e-08	1.52267e-06	Pkmyt1/Kntc1/Spdl1/Cdk1/Ndc80/Mad2l1/Cdc6/Aurkb/Zwilch/Nuf2/Dtl/Bub1b/Brca1/Spc24/Rbl1/Bub1/Cdca8/Ezh2/Chek1/Birc5/D7Ertd443e/Ctdspl/Ticrr/Trip13/Orc1/Spc25/Clspn/Ska1/Ska3/E2f7/Gen1/Ccnb1		GO:0002524	hypersensitivity	15.6583	0.000831862	0.0457347	Fcgr4/Fcgr2b/Fcgr3
GO:0044784	metaphase/anaphase transition of cell cycle	3.96446	1.75718e-08	1.65175e-06	Kntc1/Spdl1/Ndc80/Mad2l1/Cit/Cdc6/Aurkb/Bcl7a/Zwilch/Nuf2/Bub1b/Spc24/Bub1/Cdca8/Tacc3/Birc5/Trip13/Spc25/Ska1/Ska3/Gen1/Ccnb1		GO:0010656	negative regulation of muscle cell apoptotic process	6.74928	0.000849639	0.0457389	Rbpj/Lifr/Nupr1/Slc7a5/Hmox1
GO:1901990	regulation of mitotic cell cycle phase transition	2.37592	3.45454e-08	3.18099e-06	Ak1/Ccne2/Ccne1/Pkmyt1/Kntc1/Spdl1/Cdk1/Rad51b/Ndc80/E2f1/Mad2l1/Cdc6/Aurkb/Bcl7a/Cdkn2c/Zwilch/Nuf2/Dtl/Bub1b/Aif1/Stil/Brca1/Spc24/Rbl1/Bub1/Cdca8/Rrm2/Ezh2/Chek1/Cenpf/Birc5/D7Ertd443e/Cdkn1c/Ctdspl/Prkcq/Ticrr/Trip13/Orc1/Spc25/Clspn/Ska1/Atad5/Ska3/E2f7/Gen1/Ccnb1		GO:0072331	signal transduction by p53 class mediator	4.01496	0.000877081	0.0462526	Bcl3/Aen/Nupr1/Myc/Ddit4/Batf/Rrs1/Nop2
GO:0051783	regulation of nuclear division	3.34662	3.9966e-08	3.60653e-06	Kntc1/Cav2/Spdl1/Ndc80/Rad51ap1/Mad2l1/Ywhah/Aurkb/Cdca2/Zwilch/Nuf2/Bub1b/Spc24/Cul7/Bub1/Cdca8/Chek1/Birc5/Mki67/Trip13/Spc25/Nusap1/Ska1/Ska3/Gen1/Ccnb1		GO:0006400	tRNA modification	5.33807	0.000906624	0.0468543	Trmt61a/Wdr4/Alkbh1/Trmt10c/Dus3l/Mettl1
GO:0140013	meiotic nuclear division	3.09427	4.19261e-08	3.70923e-06	Ncaph/Ccne2/Ccne1/Rad51/Ndc80/Rad51ap1/Brca2/Fancd2/Top2a/Nuf2/Rad54l/Brip1/Syce2/Smc2/Kash5/Birc5/Sgo1/Fignl1/Rad54b/Iho1/Trip13/Ska1/Ska3/Aurka/Rspo1/Brme1/Mlh3/Eme1/Cenps		GO:0002285	lymphocyte activation involved in immune response	3.59503	0.000929752	0.0471075	Bcl3/Cd244a/Il4ra/Fcgr4/Gadd45g/Rab27a/Gpr65/Bcl6/Batf
GO:0045786	negative regulation of cell cycle	2.29639	5.14307e-08	4.40712e-06	Pkmyt1/Kntc1/Spdl1/Hpgd/Cdk1/Rad51/Ndc80/E2f1/Mad2l1/Brca2/Cdc6/Aurkb/Casp3/Apbb1/Fancd2/Zwilch/Nuf2/Dtl/Bub1b/Brca1/Spc24/Rbl1/Bub1/Bmp2/Cdca8/Gpr15lg/Ezh2/Chek1/Birc5/E2f8/D7Ertd443e/Cdkn1c/Gmnn/Chek2/Nek2/Ctdspl/Ticrr/Trip13/Orc1/Spc25/Clspn/Ska1/Ska3/E2f7/Pml/Gen1/Eme1/Ccnb1
GO:0050000	chromosome localization	3.50665	5.17681e-08	4.40712e-06	Spdl1/Cdk1/Ndc80/Brca2/Aurkb/Pmf1/Nuf2/Ect2/Spc24/Cdca8/Nsl1/Cenpf/Kash5/Birc5/Dsn1/Sgo1/Kif22/Nek2/Racgap1/Spc25/Ska1/Ska3/Ccnb1/Psrc1
GO:1902850	microtubule cytoskeleton organization involved in mitosis	3.03438	6.56429e-08	5.48483e-06	Fam110a/Stmn1/Spdl1/Cdk1/Ndc80/Tpx2/Mad2l1/Aurkb/Nuf2/Kif15/Mybl2/Uhrf1/Dlgap5/Stil/Cdca8/Cenph/Tacc3/Birc5/Chek2/Nek2/Prc1/Racgap1/Spc25/Nusap1/Aurka/Kif4/Ccnb1/Psrc1/Kif23
GO:0033260	nuclear DNA replication	6.02392	7.02489e-08	5.68755e-06	Tk1/Lig1/Cdk1/Rad51/Cdc45/Brca2/Pcna/Mcm7/Gmnn/Pola1/Mcm5/Atad5/Mcm3
GO:0045132	meiotic chromosome segregation	4.16415	7.05902e-08	5.68755e-06	Ncaph/Ccne2/Ccne1/Ndc80/Brca2/Fancd2/Top2a/Nuf2/Brip1/Syce2/Smc2/Kash5/Sgo1/Iho1/Trip13/Ska1/Ska3/Aurka/Mlh3
GO:0010948	negative regulation of cell cycle process	2.42408	7.72913e-08	6.11822e-06	Pkmyt1/Kntc1/Spdl1/Cdk1/Rad51/Ndc80/E2f1/Mad2l1/Brca2/Cdc6/Aurkb/Apbb1/Fancd2/Zwilch/Nuf2/Dtl/Bub1b/Brca1/Spc24/Rbl1/Bub1/Cdca8/Gpr15lg/Ezh2/Chek1/Birc5/E2f8/D7Ertd443e/Chek2/Nek2/Ctdspl/Ticrr/Trip13/Orc1/Spc25/Clspn/Ska1/Ska3/E2f7/Gen1/Eme1/Ccnb1
GO:0051255	spindle midzone assembly	10.8122	8.00882e-08	6.23031e-06	Aurkb/Lzts2/Cdca8/Birc5/Prc1/Racgap1/Kif4/Kif23
GO:0030071	regulation of mitotic metaphase/anaphase transition	3.86149	1.25018e-07	9.56068e-06	Kntc1/Spdl1/Ndc80/Mad2l1/Cdc6/Aurkb/Bcl7a/Zwilch/Nuf2/Bub1b/Spc24/Bub1/Cdca8/Birc5/Trip13/Spc25/Ska1/Ska3/Gen1/Ccnb1
GO:0007051	spindle organization	2.71676	1.32003e-07	9.9266e-06	Fam110a/Stmn1/Ndc80/Tpx2/Aurkb/Lzts2/Nuf2/Kif15/Mybl2/Uhrf1/Dlgap5/Stil/Cep72/Cdca8/Cenph/Tacc3/Tubb5/Kash5/Birc5/Aunip/Chek2/Nek2/Prc1/Racgap1/Tppp/Spc25/Ska1/Ska3/Aurka/Kif4/Ccnb1/Psrc1/Kif23
GO:1901987	regulation of cell cycle phase transition	2.12764	1.34995e-07	9.98518e-06	Ak1/Ccne2/Ccne1/Pkmyt1/Kntc1/Spdl1/Cdk1/Rad51/Rad51b/Ndc80/E2f1/Mad2l1/Brca2/Cdc6/Aurkb/Bcl7a/Apbb1/Fancd2/Cdkn2c/Zwilch/Nuf2/Dtl/Bub1b/Aif1/Stil/Brca1/Spc24/Rbl1/Bub1/Cdca8/Rrm2/Gpr15lg/Ezh2/Chek1/Cenpf/Birc5/D7Ertd443e/Cdkn1c/Chek2/Ctdspl/Prkcq/Ticrr/Trip13/Orc1/Spc25/Clspn/Ska1/Atad5/Ska3/E2f7/Gen1/Eme1/Ccnb1
GO:1902099	regulation of metaphase/anaphase transition of cell cycle	3.81606	1.54163e-07	1.12191e-05	Kntc1/Spdl1/Ndc80/Mad2l1/Cdc6/Aurkb/Bcl7a/Zwilch/Nuf2/Bub1b/Spc24/Bub1/Cdca8/Birc5/Trip13/Spc25/Ska1/Ska3/Gen1/Ccnb1
GO:0061982	meiosis I cell cycle process	3.53269	1.61689e-07	1.14687e-05	Ccne2/Ccne1/Pkmyt1/Rad51/Ndc80/Rad51ap1/Brca2/Fancd2/Top2a/Rad54l/Brip1/Syce2/Kash5/Birc5/Rad54b/Iho1/Trip13/Aurka/Brme1/Mlh3/Eme1/Cenps
GO:0007052	mitotic spindle organization	3.21791	1.62677e-07	1.14687e-05	Fam110a/Stmn1/Ndc80/Tpx2/Aurkb/Nuf2/Kif15/Mybl2/Uhrf1/Dlgap5/Stil/Cdca8/Cenph/Tacc3/Birc5/Chek2/Nek2/Prc1/Racgap1/Spc25/Aurka/Kif4/Ccnb1/Psrc1/Kif23
GO:0007127	meiosis I	3.62323	1.95519e-07	1.3572e-05	Ccne2/Ccne1/Rad51/Ndc80/Rad51ap1/Brca2/Fancd2/Top2a/Rad54l/Brip1/Syce2/Kash5/Birc5/Rad54b/Iho1/Trip13/Aurka/Brme1/Mlh3/Eme1/Cenps
GO:0045787	positive regulation of cell cycle	2.30124	3.34727e-07	2.26605e-05	Ncaph/Sox15/Ccne2/Ccne1/Cdk1/Rad51b/Ndc80/Rad51ap1/Mad2l1/Brca2/Cit/Cdc6/Aurkb/Dtl/Aif1/Stil/Ect2/Brca1/Bub1/Cdca8/Rrm2/Ezh2/Smc2/Chek1/Birc5/E2f8/Ncapg2/Chek2/Racgap1/Orc1/Ncapd2/Ncapg/Nusap1/Ska1/Atad5/Ska3/Rad18/Aurka/E2f7/Gen1/Ccnb1/Kif23
GO:0000022	mitotic spindle elongation	11.3528	3.36492e-07	2.26605e-05	Aurkb/Cdca8/Birc5/Prc1/Racgap1/Kif4/Kif23
GO:2001251	negative regulation of chromosome organization	3.4878	7.30431e-07	4.84662e-05	Kntc1/Spdl1/Ndc80/Mad2l1/Aurkb/Zwilch/Nuf2/Bub1b/Spc24/Bub1/Cdca8/Src/Birc5/Trip13/Spc25/Ska1/Ska3/Pml/Gen1/Ccnb1
GO:0090266	regulation of mitotic cell cycle spindle assembly checkpoint	6.95068	1.84755e-06	0.000119088	Ndc80/Mad2l1/Aurkb/Cdca8/Birc5/Ska1/Ska3/Gen1/Ccnb1
GO:1903504	regulation of mitotic spindle checkpoint	6.95068	1.84755e-06	0.000119088	Ndc80/Mad2l1/Aurkb/Cdca8/Birc5/Ska1/Ska3/Gen1/Ccnb1
GO:0070192	chromosome organization involved in meiotic cell cycle	4.68527	1.95236e-06	0.000122348	Ncaph/Ccne2/Ccne1/Rad51/Fancd2/Brip1/Syce2/Smc2/Kash5/Iho1/Trip13/Ncapd2/Mlh3
GO:1901976	regulation of cell cycle checkpoint	4.68527	1.95236e-06	0.000122348	Rad51/Ndc80/Mad2l1/Brca2/Aurkb/Brca1/Cdca8/Birc5/Chek2/Ska1/Ska3/Gen1/Ccnb1
GO:0051231	spindle elongation	9.46065	1.99018e-06	0.000123009	Aurkb/Cdca8/Birc5/Prc1/Racgap1/Kif4/Kif23
GO:0090231	regulation of spindle checkpoint	6.63474	2.95605e-06	0.000179193	Ndc80/Mad2l1/Aurkb/Cdca8/Birc5/Ska1/Ska3/Gen1/Ccnb1
GO:1902969	mitotic DNA replication	7.63212	2.97861e-06	0.000179193	Tk1/Lig1/Cdk1/Rad51/Cdc45/Brca2/Pola1/Mcm3
GO:0007292	female gamete generation	2.91422	3.07519e-06	0.000182569	Ncaph/Mmp2/Nanos1/Hpgd/Ndc80/Brca2/Top2a/Tut4/Gdf9/Src/Ptn/Kash5/Iho1/Hrob/Trip13/Mcm8/Ska1/Ednra/Ska3/Aurka/Brme1/Mlh3/Ccnb1
GO:0033044	regulation of chromosome organization	2.36815	3.23067e-06	0.000189309	Ncaph/Kntc1/Spdl1/Cdk1/Ndc80/Mad2l1/Cit/Cdc6/Aurkb/Bcl7a/Zwilch/Nuf2/Bub1b/Spc24/Rmi2/Bub1/Cdca8/Smc2/Tacc3/Src/Birc5/Ncapg2/Nek2/Prkcq/Trip13/Spc25/Ncapd2/Ncapg/Ska1/Ska3/Pml/Gen1/Ccnb1
GO:1905820	positive regulation of chromosome separation	5.5925	5.13499e-06	0.000297039	Ncaph/Aurkb/Cdca8/Smc2/Birc5/Ncapg2/Ncapd2/Ncapg/Ska1/Ska3
GO:0006310	DNA recombination	2.12967	6.05993e-06	0.000346107	Lig1/Clcf1/Rad51/Rad51b/Rad51ap1/Cdc45/Brca2/Fancd2/Top2a/Exo1/Rad54l/Brip1/Mms22l/Brca1/Hells/Rmi2/Ezh2/Chek1/Kash5/Mcm7/Fignl1/Aunip/Rad54b/Iho1/Hrob/Trip13/Mcm8/Rpa3/Il27ra/Mcm5/Atad5/Mcm3/Gins2/Rad18/Brme1/Gen1/Eme1/Nsd2/Cenps
GO:0006302	double-strand break repair	2.09624	1.15167e-05	0.000649539	Lig1/Rad51/Rad51b/Rad51ap1/Cdc45/Esco2/Brca2/Bcl7a/Apbb1/Ggn/Fancd2/Rad54l/Brip1/Mms22l/Brca1/Hells/Rmi2/Chek1/Kash5/Mcm7/Fignl1/Aunip/Chek2/Rad54b/Pola1/Trip13/Mcm8/Rpa3/Mcm5/Mcm3/Gins2/Brme1/Pml/Foxm1/Gen1/Eme1/Nsd2/Cdca5
GO:0007131	reciprocal meiotic recombination	4.69476	1.18209e-05	0.000650436	Rad51/Rad51ap1/Fancd2/Top2a/Rad54l/Brip1/Rad54b/Trip13/Brme1/Eme1/Cenps
GO:0140527	reciprocal homologous recombination	4.69476	1.18209e-05	0.000650436	Rad51/Rad51ap1/Fancd2/Top2a/Rad54l/Brip1/Rad54b/Trip13/Brme1/Eme1/Cenps
GO:0035825	homologous recombination	4.32487	1.20743e-05	0.000656376	Rad51/Rad51ap1/Fancd2/Top2a/Rad54l/Brip1/Brca1/Rad54b/Trip13/Brme1/Eme1/Cenps
GO:0090267	positive regulation of mitotic cell cycle spindle assembly checkpoint	8.84632	1.90661e-05	0.00102412	Ndc80/Mad2l1/Aurkb/Cdca8/Birc5/Gen1
GO:0051988	regulation of attachment of spindle microtubules to kinetochore	6.17838	1.99756e-05	0.00106035	Cdk1/Aurkb/Ect2/Cdca8/Birc5/Nek2/Racgap1/Ccnb1
GO:0044839	cell cycle G2/M phase transition	2.52752	2.34979e-05	0.00123282	Pkmyt1/Cdk1/Rad51b/Ndc80/Cit/Cdc6/Aurkb/Dtl/Ccna2/Brca1/Fbxl7/Chek1/Cenpf/Birc5/Nes/D7Ertd443e/Chek2/Prkcq/Ticrr/Orc1/Clspn/Atad5/Foxm1/Ccnb1
GO:0090232	positive regulation of spindle checkpoint	8.10912	3.6142e-05	0.0018744	Ndc80/Mad2l1/Aurkb/Cdca8/Birc5/Gen1
GO:0000086	G2/M transition of mitotic cell cycle	2.56692	3.9905e-05	0.00204604	Pkmyt1/Cdk1/Rad51b/Cit/Cdc6/Aurkb/Dtl/Ccna2/Brca1/Fbxl7/Chek1/Cenpf/Birc5/Nes/D7Ertd443e/Chek2/Prkcq/Ticrr/Orc1/Clspn/Foxm1/Ccnb1
GO:0071805	potassium ion transmembrane transport	2.56078	6.15298e-05	0.00311935	Hcn2/P2ry12/Kcnj12/Kcnk12/Kcnd1/Kcnma1/Ptger3/Large1/Slc12a2/Kcnip3/Bin1/Cav1/Kcng2/Hpn/Kcnj9/Kcnb1/Kcnd2/Kcnk9/Slc24a1/Kcnip4/Kcne4
GO:0051225	spindle assembly	2.54167	6.88222e-05	0.00345029	Ndc80/Tpx2/Aurkb/Lzts2/Kif15/Mybl2/Uhrf1/Stil/Cdca8/Tubb5/Kash5/Birc5/Chek2/Nek2/Prc1/Racgap1/Ska1/Ska3/Aurka/Kif4/Kif23
GO:0051315	attachment of mitotic spindle microtubules to kinetochore	5.18984	8.51209e-05	0.0042205	Cdk1/Ndc80/Aurkb/Nuf2/Cdca8/Birc5/Ska1/Ska3
GO:0007129	homologous chromosome pairing at meiosis	4.56138	9.53032e-05	0.004674	Ccne2/Ccne1/Fancd2/Brip1/Syce2/Kash5/Iho1/Trip13/Mlh3
GO:0006271	DNA strand elongation involved in DNA replication	6.95068	0.000105541	0.00506595	Rfc3/Lig1/Pcna/Mcm7/Pola1/Mcm3
GO:0060623	regulation of chromosome condensation	6.95068	0.000105541	0.00506595	Ncaph/Smc2/Ncapg2/Ncapd2/Ncapg/Ccnb1
GO:0030261	chromosome condensation	4.42316	0.000123942	0.00588658	Ncaph/Cdk1/Top2a/Smc2/Ncapg2/Ncapd2/Ncapg/Nusap1/Ccnb1
GO:0051383	kinetochore organization	5.67639	0.000125875	0.00591614	Kntc1/Ndc80/Cenpk/Nuf2/Dlgap5/Cenph/Smc2
GO:0034508	centromere complex assembly	4.80541	0.000156485	0.00727896	Kntc1/Cenpk/Dlgap5/Cenph/Oip5/Cenpn/Mis18bp1/Cenpi
GO:1901343	negative regulation of vasculature development	2.76055	0.000185535	0.0085422	Angptl7/Sparc/Serpinf1/Ecscr/Slc12a2/E2f2/Epn2/Ptn/Cd36/Tek/Naxe/Crhr2/Stat1/Cxcl10/Angpt4/Pml
GO:0007600	sensory perception	1.91465	0.000200773	0.00915037	Serpine2/Gnas/Kcnma1/Hexa/Lxn/Large1/Mgll/Atp8a2/Casp3/Slc12a2/Tmc7/Kcnip3/Phf24/Myo15a/Ttc8/Adra2a/Whrn/Diaph3/Or5v1/Cd36/Marveld2/Grm3/Hpn/Cryba4/Tmem150c/Adcy3/Col1a1/Sod1/Kcnd2/Kcnk9/Scn11a/Slc24a1/Jag2/Vmn1r4
GO:0000725	recombinational repair	2.18673	0.000242785	0.0109545	Rad51/Rad51b/Rad51ap1/Cdc45/Brca2/Rad54l/Mms22l/Brca1/Hells/Rmi2/Chek1/Kash5/Mcm7/Fignl1/Aunip/Rad54b/Hrob/Mcm8/Rpa3/Mcm5/Mcm3/Gins2/Brme1/Gen1
GO:0007080	mitotic metaphase chromosome alignment	3.24365	0.00025006	0.0110805	Spdl1/Cdk1/Ndc80/Aurkb/Nuf2/Cdca8/Birc5/Kif22/Ska1/Ska3/Ccnb1/Psrc1
GO:0006813	potassium ion transport	2.27262	0.000250632	0.0110805	Hcn2/P2ry12/Kcnj12/Kcnk12/Kcnd1/Kcnma1/Ptger3/Large1/Trem2/Slc12a2/Kcnip3/Bin1/Cav1/Kcng2/Hpn/Kcnj9/Kcnb1/Kcnd2/Kcnk9/Slc24a1/Kcnip4/Kcne4
GO:1901978	positive regulation of cell cycle checkpoint	6.08184	0.000252945	0.0110805	Ndc80/Mad2l1/Aurkb/Cdca8/Birc5/Gen1
GO:0045143	homologous chromosome segregation	3.68597	0.0002735	0.0118657	Ccne2/Ccne1/Brca2/Fancd2/Brip1/Syce2/Kash5/Iho1/Trip13/Mlh3
GO:0000727	double-strand break repair via break-induced replication	7.37193	0.000297492	0.0126631	Cdc45/Mcm7/Mcm5/Mcm3/Gins2
GO:0007144	female meiosis I	7.37193	0.000297492	0.0126631	Ndc80/Trip13/Aurka/Brme1/Mlh3
GO:0007143	female meiotic nuclear division	3.84116	0.000396741	0.0166419	Ncaph/Ndc80/Top2a/Trip13/Ska1/Ska3/Aurka/Brme1/Mlh3
GO:0000724	double-strand break repair via homologous recombination	2.15618	0.000398343	0.0166419	Rad51/Rad51b/Rad51ap1/Cdc45/Brca2/Rad54l/Mms22l/Brca1/Hells/Rmi2/Chek1/Kash5/Mcm7/Fignl1/Aunip/Rad54b/Mcm8/Rpa3/Mcm5/Mcm3/Gins2/Brme1/Gen1
GO:0016525	negative regulation of angiogenesis	2.67334	0.000418213	0.0173117	Sparc/Serpinf1/Ecscr/Slc12a2/E2f2/Epn2/Ptn/Cd36/Tek/Naxe/Crhr2/Stat1/Cxcl10/Angpt4/Pml
GO:0051953	negative regulation of amine transport	4.73032	0.000452337	0.018554	P2ry12/Ptger3/Rgs2/Adra2a/Crhr2/Gabbr1/Slc43a1
GO:0000281	mitotic cytokinesis	2.61585	0.000531181	0.0212096	Stmn1/Klhdc8b/Cit/Aurkb/Lzts2/Ckap2/Ect2/Cul7/Anln/Cdca8/Birc5/Racgap1/Nusap1/Kif4/Kif23
GO:0031110	regulation of microtubule polymerization or depolymerization	2.61585	0.000531181	0.0212096	Stmn1/Tpx2/Pak1/Aurkb/Sgk1/Ckap2/Cav1/Diaph3/Nme7/Kif21a/Mapt/Ska1/Ska3/Tubb4a/Psrc1
GO:2000181	negative regulation of blood vessel morphogenesis	2.61585	0.000531181	0.0212096	Sparc/Serpinf1/Ecscr/Slc12a2/E2f2/Epn2/Ptn/Cd36/Tek/Naxe/Crhr2/Stat1/Cxcl10/Angpt4/Pml
GO:0007188	adenylate cyclase-modulating G protein-coupled receptor signaling pathway	2.237	0.000579328	0.0227545	P2ry12/Gnas/Adcy8/Ramp1/Ptger3/Rgs2/S1pr1/S1pr2/Gnaz/Adra2a/Gpr15lg/Mrgpre/Grm3/Vipr1/Adcy3/Crhr2/Rapgef4/Gabbr1/Ednra/Cxcl10
GO:0003012	muscle system process	1.79066	0.000579958	0.0227545	Npnt/Gatm/Gnas/Kcnma1/Ptafr/Asb2/Ptger3/Rgs2/Srl/Trpc3/Mymk/Large1/Pak1/Atp8a2/Jup/Tpm2/Apbb1/Map2k6/Bin1/Tiam1/Aif1/Cav1/Bmp2/Adra2a/Ezh2/Smtn/Igfbp5/Sod1/Kcnd2/Cacnb1/Atp2a1/Ednra/Scn11a/Gtf2ird1/Kcne4
GO:0030198	extracellular matrix organization	1.96364	0.000594464	0.022925	Npnt/Angptl7/Mmp2/Eng/Adamts16/Cav2/Olfml2b/Adtrp/Mmp11/Large1/Phldb2/Mmp28/Apbb1/Fscn1/Prdx4/Matn1/Cav1/Bmp2/Phldb1/Hpn/Mmp13/Lox/Col1a1/Mmp12/Vtn/Mmp23/Cyp2j6
GO:0045229	external encapsulating structure organization	1.96364	0.000594464	0.022925	Npnt/Angptl7/Mmp2/Eng/Adamts16/Cav2/Olfml2b/Adtrp/Mmp11/Large1/Phldb2/Mmp28/Apbb1/Fscn1/Prdx4/Matn1/Cav1/Bmp2/Phldb1/Hpn/Mmp13/Lox/Col1a1/Mmp12/Vtn/Mmp23/Cyp2j6
GO:1901989	positive regulation of cell cycle phase transition	2.49512	0.000603023	0.023058	Ccne2/Ccne1/Cdk1/Rad51b/Dtl/Aif1/Stil/Rrm2/Ezh2/Chek1/Birc5/Chek2/Ska1/Atad5/Ska3/Ccnb1
GO:0090307	mitotic spindle assembly	2.81116	0.000608278	0.0230634	Tpx2/Aurkb/Kif15/Mybl2/Uhrf1/Cdca8/Birc5/Chek2/Nek2/Prc1/Racgap1/Kif4/Kif23
GO:0043062	extracellular structure organization	1.95488	0.000637426	0.0239672	Npnt/Angptl7/Mmp2/Eng/Adamts16/Cav2/Olfml2b/Adtrp/Mmp11/Large1/Phldb2/Mmp28/Apbb1/Fscn1/Prdx4/Matn1/Cav1/Bmp2/Phldb1/Hpn/Mmp13/Lox/Col1a1/Mmp12/Vtn/Mmp23/Cyp2j6
GO:0001508	action potential	2.47135	0.000671667	0.025046	Kcnd1/Kcnma1/Ywhah/Jup/Bin1/Cav1/Kcng2/Cd36/Slc4a3/Sod1/Kcnb1/Kcnd2/Kcnk9/Rapgef4/Scn11a/Kcne4
GO:0031297	replication fork processing	3.07587	0.00072209	0.0267055	Cdk1/Rad51/Brca2/Pcna/Exo1/Mms22l/Brca1/Zranb3/Gen1/Eme1/Cenps
GO:0007214	gamma-aminobutyric acid signaling pathway	5.12155	0.000730562	0.0267992	Cit/Slc12a2/Phf24/Plcl2/Gabbr1/Shisa7
GO:0009157	deoxyribonucleoside monophosphate biosynthetic process	6.23779	0.000747014	0.0269642	Tk1/Dhfr/Tyms/Dck/Dut
GO:0033604	negative regulation of catecholamine secretion	6.23779	0.000747014	0.0269642	P2ry12/Ptger3/Adra2a/Crhr2/Gabbr1
GO:0007599	hemostasis	2.14203	0.000763974	0.0273576	Serpine2/Angptl7/P2ry12/Gnas/Kng2/Evl/Adtrp/Tspan18/Gp9/Cd9/Cav1/Adra2a/Adgrg1/Cd36/Tec/Prkcq/Prdx2/Vtn/Angpt4/Proz/Entpd2
GO:0032465	regulation of cytokinesis	2.70304	0.000893316	0.0317373	Brca2/Cit/Cdc6/Aurkb/Ect2/Cdca8/Birc5/E2f8/Prc1/Racgap1/Aurka/E2f7/Kif23
GO:0014061	regulation of norepinephrine secretion	5.79223	0.00110339	0.0388945	P2ry12/Ptger3/Adra2a/Kcnb1/Crhr2
GO:0031109	microtubule polymerization or depolymerization	2.15487	0.00124265	0.0432676	Stmn1/Cdk1/Tpx2/Pak1/Aurkb/Sgk1/Ckap2/Cav1/Diaph3/Tppp/Nme7/Kif21a/Mapt/Ska1/Ska3/Lrrc49/Tubb4a/Psrc1/Kif18b
GO:0045932	negative regulation of muscle contraction	4.05456	0.00124663	0.0432676	Kcnma1/Ptger3/Rgs2/Bin1/Adra2a/Sod1/Atp2a1
GO:0046785	microtubule polymerization	2.40865	0.00127944	0.0438321	Stmn1/Cdk1/Tpx2/Pak1/Sgk1/Cav1/Diaph3/Tppp/Nme7/Kif21a/Mapt/Ska1/Lrrc49/Tubb4a/Psrc1
GO:0045005	DNA-templated DNA replication maintenance of fidelity	2.87743	0.00128753	0.0438321	Cdk1/Rad51/Brca2/Pcna/Exo1/Mms22l/Brca1/Zranb3/Gen1/Eme1/Cenps
GO:0006805	xenobiotic metabolic process	3.06005	0.00129993	0.0438321	As3mt/Bphl/Aldh2/Fmo5/Gstm5/Rora/Gsto2/Akr1c13/Gstt1/Cyp2j6
GO:0032467	positive regulation of cytokinesis	3.60406	0.00130175	0.0438321	Cit/Cdc6/Aurkb/Ect2/Cdca8/Birc5/Racgap1/Kif23
GO:0007596	blood coagulation	2.09268	0.00135032	0.0451308	Serpine2/Angptl7/P2ry12/Gnas/Kng2/Evl/Adtrp/Gp9/Cd9/Cav1/Adra2a/Adgrg1/Cd36/Tec/Prkcq/Prdx2/Vtn/Angpt4/Proz/Entpd2
GO:0051952	regulation of amine transport	2.70304	0.00139207	0.0461841	P2ry12/Slc36a2/Ptger3/Rgs2/Slc12a2/Dpysl2/Adra2a/Sv2a/Kcnb1/Crhr2/Gabbr1/Slc43a1
