# Supplementary material
Source: Research Square preprint supplement (doi:10.21203/rs.3.rs-10072088/v1)
Supplement: Supplementary file 3 [file 1e5b12165368885227fdd6b4.xlsx]

## Sheet: delta_LPS_response_GW_minus_Ctr
Brain-wide deltaLPS: GSEA-GO:BP									Brain-wide deltaLPS: GSEA-KEGG
ID	Description	enrichmentScore	NES	pvalue	p.adjust	core_enrichment_symbols			ID	Description	enrichmentScore	NES	pvalue	p.adjust	core_enrichment_symbols
GO:0140241	translation at synapse	-0.708534	-2.78125	1e-10	2.03167e-07	Rpl15/Rpl38/Uba52/Rpl23/Rps15a/Rps24/Rpl26/Rps26/Rps27a/Rpl34/Rpl23a/Rpl29/Rpl37rt/Rpl37/Rps28/Rpl6/Rps12/Rpl36a/Rpl4/Eef2/Rpl22/Rps27/Rpl5/Rpl17/Rpl35rt/Rpl14/Rpl36/Rplp2/Rpl27/Rpl13a/Rpl35/Rpl27a/Rpl8/Rpl10/Rpl37a/Rps5/Rps16/Rpl13/Rpl32/Rpl12/Rpl9/Rps14/Rpl35a			mmu03010	Ribosome	-0.60534	-2.90938	1e-10	3.49e-08	Gm11703/Rpl15/Mrps26/Rpl38/Uba52/Rpl23/Mrps18a/Mrpl15/Rps15a/Rps24/Rpl26/Rps26/Mrps7/Rps27a/Rpl34-ps1/Rpl34/Rps13/Gm46442/Rpl23a/Mrps11/Rpl29/Mrpl28/Rpl3l/Mrpl4/Mrpl49/Mrpl47/Mrpl36/Rpl41/Mrpl22/Mrpl23/Mrpl52/Mrps28/Mrpl43/Rpl37rt/Rpl37/Rps28/Rpl18/Rpl18a/Mrpl30/Rplp0/Mrpl34/Rps29/Rps3a1/Mrpl14/Mrpl33/Rpl6/Rps4x/Rps12/Rps6/Rpl36a/Mrps9/Rpl4/Rpl22/Rps25/Rps27/Mrpl46/Rpl31/Rpl5/Mrps21/Rps7/Rpl17/Mr…
GO:0140242	translation at postsynapse	-0.708534	-2.78125	1e-10	2.03167e-07	Rpl15/Rpl38/Uba52/Rpl23/Rps15a/Rps24/Rpl26/Rps26/Rps27a/Rpl34/Rpl23a/Rpl29/Rpl37rt/Rpl37/Rps28/Rpl6/Rps12/Rpl36a/Rpl4/Eef2/Rpl22/Rps27/Rpl5/Rpl17/Rpl35rt/Rpl14/Rpl36/Rplp2/Rpl27/Rpl13a/Rpl35/Rpl27a/Rpl8/Rpl10/Rpl37a/Rps5/Rps16/Rpl13/Rpl32/Rpl12/Rpl9/Rps14/Rpl35a			mmu04080	Neuroactive ligand-receptor interaction	-0.358656	-1.84525	6.1283e-08	1.06939e-05	Rln3/Rxfp1/Grin3b/Bdkrb2/Gabrq/Gria1/Grm7/Calcr/Qrfprl/Htr5a/Pgrmc1/Uts2/Gnrh1/Tacr3/Htr5b/Pth1r/Trhr2/Ghsr/Apln/Ednra/Gabra3/Chrnb3/Gpr50/Adra2a/Grm2/Oprk1/Sstr3/Chrm4/Ghrh/Trhr/Pate2/Npff/Gpr83/Nts/Ntsr2/Grid1/Ucn3/Nmbr/Chrna2/Chrm3/Glra2/Chrm2/Aplnr/Ptgfr/Trpv1/Npy1r/Rxfp3/Ptger1/Galr3/Npffr1/Htr2b/Gabrg3/Glp1r/Lepr/Htr1d/Grik3/Gabbr1/Hc/Ntsr1/Tacr1/Grin3a/Pth2r/Sstr4/Lpar3/Oxt/Oprl1/Ptger3/Ga…
GO:0140236	translation at presynapse	-0.707529	-2.75496	1e-10	2.03167e-07	Rpl15/Rpl38/Uba52/Rpl23/Rps15a/Rps24/Rpl26/Rps26/Rps27a/Rpl34/Rpl23a/Rpl29/Rpl37rt/Rpl37/Rps28/Rpl6/Rps12/Rpl36a/Rpl4/Rpl22/Rps27/Rpl5/Rpl17/Rpl35rt/Rpl14/Rpl36/Rplp2/Rpl27/Rpl13a/Rpl35/Rpl27a/Rpl8/Rpl10/Rpl37a/Rps5/Rps16/Rpl13/Rpl32/Rpl12/Rpl9/Rps14/Rpl35a			mmu05012	Parkinson disease	-0.342421	-1.73964	3.40076e-06	0.000395622	Pink1/Psmc5/Cox7a2/Ndufb3/Atp5f1b/Atp5mc1/Drd1/Prkaca/Prkacb/Apaf1/Slc6a3/Psmb1/Ndufb11/Uba52/Slc39a10/Psmc1/Psma5/Psmb7/Vdac1/Calm3/Slc39a11/Tuba8/Vdac3/Ndufb7/Ndufa11/Ndufb9/Rps27a/Slc39a8/Sdhb/Txn2/Psmd9/Ndufc1/Klc2/Psmd14/Camk2g/Atp5f1e/Cox5b/Psmb6/Casp3/Ndufs3/Cox7a2l/Camk2b/Ndufs7/mt-Nd4l/Psmd3/Psmb4/Htra2/Psma7/Septin5/Atp5f1c/Tubb2b/Ndufs6/Ndufa1/Sod1/Casp9/Uqcr10/Tubb4b/Slc39a5/Slc39a3/N…
GO:0050803	regulation of synapse structure or activity	-0.354604	-1.90611	2.51283e-10	3.82893e-07	Crmp1/Amigo1/Pgrmc1/Arc/Trem2/Slc12a5/Mapre3/Cacna2d3/Camk1/Dlgap4/Rap2a/Rims3/App/Ghsr/Cttnbp2/Dpysl2/Dctn1/Ptpn13/Akt1/Agrn/Ephb1/Rac3/Camk2b/Adgrl1/Dlg5/Baiap2/Fyn/Slitrk1/Lrrc4b/Grid1/Map1b/Nrxn2/Ntrk2/Ephb3/Ptk2/Ror2/Lingo2/Cfl1/Vstm5/Rapgef2/Asap1/Slitrk5/Anapc2/Prnp/Cbln2/Zdhhc8/Cdk5/Lin7b/Limk1/Marcks/Slc17a8/Snca/Mark2/Thbs2/Arhgap22/C1ql1/Apoe/Igsf9/Cux2/Ube2m/Neurl1a/Snap91/Kalrn/Robo1…			mmu04670	Leukocyte transendothelial migration	0.443159	1.94728	1.4564e-05	0.00101657	Mapk12/Pik3r3/Msn/Cldn2/Icam1/Arhgap5/Itgal/Pxn/Pik3ca/Rock1/Itgb2/Mmp2/Ocln/Pecam1/Cybb/Itgb1/Ctnna3/Ncf1/Vav3/Vcam1/Itga4/Myl12a/Rock2/Vasp/Mmp9/Mylpf
GO:0002181	cytoplasmic translation	-0.427799	-2.12027	5.64969e-10	6.88698e-07	Rpl38/Uba52/Rpl23/Rps15a/Rps24/Rpl26/Impact/Rps26/Rps27a/Rpl34/Rps13/Rpl23a/Ang/Rpl29/Nprl2/Ftsj1/Ywhag/Wdr24/Mettl3/Rpl41/Akt1/Rpl37rt/Rpl37/Gpr155/Rps28/Rpl18/Rpl18a/Ybx1/Rplp0/Eif4h/Rps29/Eif2b5/Rps3a1/Pkm/Rpl6/Rps4x/Rps12/Rps6/Rpl36a/Rpl4/Eef2/Rpl22/Rps25/Rpl31/Lamtor1/Rpl5/Rps7/Rpl17/Rpl35rt/Rpl14/Rpl36/Rplp2/Eif3k/Fau/Rpl27/Rpl13a/Rps8/Rpl35/Eif3d/Rps19/Rpl39/Rps9/Akt1s1/Eif3i/Rps20/Rps21/R…			mmu05171	Coronavirus disease	-0.357028	-1.75155	1.31012e-05	0.00101657	Rpl37rt/Rpl37/Nfkbib/Rps28/Rpl18/Rpl18a/Mapk1/Rplp0/Rps29/Rps3a1/Rpl6/Rps4x/Rps12/Rps6/C1s2/Rpl36a/Rpl4/Rpl22/Rps25/Rps27/Rpl31/Rpl5/Masp1/C2/Rps7/Rpl17/Rpl14/Jun/Rpl36/Rplp2/Hc/Nfkbia/Prkca/Fau/Rpl27/Rpl13a/Gm15501/Rps8/Rpl35/Rps19/Rpl39/Rps9/Rps20/Rps21/Rpl27a/Rpl8/Rpl3/Rps15/Rpl11/Rpl10/Rpl37a/Rps17/Rps3/Pik3cd/Rpl19/Rps23/Rps5/Rps16/Rpl13/Rplp1/Rpsa/Rpl32/Rpl12/Rpl9/Rps14/Mapk3/Rpl30/Rps2/Rpl…
GO:0050807	regulation of synapse organization	-0.347814	-1.86597	8.21255e-10	8.34258e-07	Crmp1/Amigo1/Pgrmc1/Arc/Trem2/Slc12a5/Mapre3/Cacna2d3/Camk1/Dlgap4/Rap2a/Rims3/App/Ghsr/Cttnbp2/Dpysl2/Dctn1/Ptpn13/Akt1/Agrn/Ephb1/Rac3/Camk2b/Adgrl1/Dlg5/Baiap2/Fyn/Slitrk1/Lrrc4b/Grid1/Map1b/Nrxn2/Ntrk2/Ephb3/Ptk2/Ror2/Lingo2/Cfl1/Vstm5/Rapgef2/Asap1/Slitrk5/Anapc2/Prnp/Cbln2/Zdhhc8/Cdk5/Lin7b/Limk1/Marcks/Snca/Mark2/Thbs2/Arhgap22/C1ql1/Apoe/Igsf9/Cux2/Ube2m/Neurl1a/Snap91/Kalrn/Robo1/Sema4a/…			mmu05022	Pathways of neurodegeneration - multiple diseases	-0.281818	-1.52667	2.80803e-05	0.00163334	Spg11/Pink1/Psmc5/Cox7a2/Ndufb3/Ambra1/Atp5f1b/Atp5mc1/Dnah5/Prkcg/Apaf1/Slc6a3/Psmb1/Ndufb11/Uba52/Psmc1/Tomm40/Ppid/Psma5/Psmb7/Vdac1/Bcl2/Calm3/Plcb2/Tuba8/Fig4/Vdac3/Frat2/Dnal1/Htt/Ndufb7/Atp2a1/Cacna1d/Wnt9a/Ndufa11/Ndufb9/Gria1/Rps27a/Dctn2/Ulk2/Zfyve1/Sdhb/Psmd9/Ndufc1/Klc2/Ppp3r2/Atg13/Becn1/Dctn6/Psmd14/Ift57/App/Camk2g/Atp5f1e/Dctn1/Cox5b/Psmb6/Casp3/Gpx1/Ndufs3/Cox7a2l/Camk2b/Dnah14/N…
GO:0016358	dendrite development	-0.348735	-1.83365	8.76198e-08	7.62918e-05	Atg16l1/Prex1/Nr2e1/Arc/Slc12a5/Mapre3/Camk1/Rap2a/Csmd3/App/Git1/Abl2/Ephb1/Grip1/Gorasp1/Camk2b/Sema3a/Dlg5/Baiap2/Map2/Fyn/Map1b/Ulk4/Ntrk2/Ephb3/Bmp7/Foxo6/Akap5/Cfl1/Dpysl5/Rapgef2/Arf1/Asap1/Slitrk5/Anapc2/Klhl1/Cdk5/Ilk/Sdk1/Epha5/Marcks/Fat3/Fezf2/Bbs1/Apoe/Igsf9/Cux2/Neurl1a/Crebbp/Kalrn/Robo1/Map1s/Fbxo31/Shank1/Lst1/Gsk3a/Map6/Crtc1/Nfatc4/Grin3a/Mfn2/Ctnnd2/Kif1a/Wnt5a/Palm/Bcl11a/D13…			mmu00910	Nitrogen metabolism	0.760166	2.10942	5.31539e-05	0.00222378	Car4/Car8/Car13/Car7/Car12/Car9/Car15/Cps1
GO:0002443	leukocyte mediated immunity	0.342731	1.79216	2.46528e-07	0.000184322	Icosl/Crtam/Rif1/Il20rb/Lyn/Fcgr3/Kit/Rnf19b/Csf2rb/Dao/Tlr3/Icam1/H2-D1/Ctsh/Itgb2/Crhr1/Milr1/Tfrc/Malt1/Rsad2/Kmt5b/Tyrobp/Dhx36/Tlr4/Ptgdr/Pagr1a/Pms2/Ctsc/Bcl6/Stxbp2/B2m/Gzmm/Ncf1/Btk/Kmt2e/Dbh/Ptprc/Was/Kctd9/Nsd2/Havcr2/Myo1g/Cd300a/Tlr2/Cd24a/Pdpk1/Nectin4/Nbn/Stat5b/Fcgr2b/Rab27a/Jag1/Nlrp3/Traf6/Myo1f/Nckap1l/Sanbr/Ccl3/Atad5/Vamp8/Kif5b/Rigi/Cd70/Cd46/Lat/Arl8b/Fcgr4/Unc13d/Hfe/Shld3/…			mmu00190	Oxidative phosphorylation	-0.380439	-1.75427	5.73468e-05	0.00222378	Cox7a2/Ndufb3/Atp5f1b/Atp5mc1/Atp6v1f/Atp6v1d/Atp5me/Ndufb11/Atp5mf/Ndufb7/Ndufa11/Ndufb9/Sdhb/Ndufc1/Atp5mg/Atp5f1e/Cox5b/Tcirg1/Atp6v0c/Atp6v1b2/Ndufs3/Cox7a2l/Ndufs7/mt-Nd4l/Atp5f1c/Ndufs6/Ndufa1/Uqcr10/Atp6v0d1/Ndufa8/Ndufb5/Uqcrh/Cox6c/Cox6a1/Ndufv1/Atp6v1c2/Ndufa2/Ndufs5/Ndufa13/Atp6v1g2/Uqcrb/Atp5po/Uqcrq/Ndufb6/Atp6v0a1/Uqcr11/Ndufs8/Cox4i1/Ndufb8/Atp6v0b
GO:0045088	regulation of innate immune response	0.320471	1.72029	2.72174e-07	0.000184322	A2m/Ptpn22/Crtam/Appl2/Lyn/Hmgb2/Lats1/Serping1/Zc3hav1/Tlr3/Lbp/Trim62/Stat2/Tlr7/Gbp3/Mmp2/Smpdl3a/Rsad2/Oasl1/Tyrobp/Trim12c/Tlr4/Cfh/Parp14/Itch/Mcoln1/Atg5/Ncf1/Btk/Dpp8/Ddx3x/Ranbp2/Trim30d/Havcr2/Parp9/Nfe2l2/Tmem126a/Stmp1/Mfhas1/Cd300a/Ifi209/Eif2ak2/Tlr2/Dhx33/Pdpk1/Rnf135/Nectin4/Traf3ip3/Fpr2/Tlr13/Irgm1/Stat5b/Zdhhc5/Xrcc6/Dhx58/Rps6ka3/Nlrc5/Nlrp10/Nlrp3/Rictor/Traf6/Rbm47/Mapkapk2/…			mmu05016	Huntington disease	-0.307012	-1.58577	5.12275e-05	0.00222378	Ndufa12/Polr2h/Psmc2/Ap2a2/Psmc5/Cox7a2/Ndufb3/Ambra1/Atp5f1b/Atp5mc1/Dnah5/Polr2l/Apaf1/Psmb1/Ndufb11/Psmc1/Psma5/Psmb7/Vdac1/Plcb2/Tuba8/Vdac3/Dnal1/Htt/Ndufb7/Ndufa11/Ndufb9/Clta/Gria1/Dctn2/Ulk2/Rest/Sdhb/Psmd9/Ndufc1/Klc2/Atg13/Becn1/Dctn6/Psmd14/Ift57/Atp5f1e/Dctn1/Cox5b/Psmb6/Casp3/Bbc3/Gpx1/Ndufs3/Cox7a2l/Dnah14/Ndufs7/mt-Nd4l/Dnai1/Psmd3/Psmb4/Cacna1b/Psma7/Atp5f1c/Polr2f/Tubb2b/Ap2a1/Nd…
GO:0007611	learning or memory	-0.330426	-1.75595	6.01193e-07	0.000366427	Prrt1/Vdac1/Gpr88/Itga8/Slc8a3/Vdac3/Htt/Srcin1/Mdk/Cyp7b1/Gria1/Grm7/Pgrmc1/Arc/Trem2/Slc12a5/Tafa2/Tacr3/App/Brsk1/Large1/Ghsr/Git1/Abl2/Rcan1/Ttbk1/Casp3/Pde8b/Nrgn/Oprk1/Srf/Ncam1/Itga5/Nts/Pla2g6/Ulk4/Nrxn2/Tbr1/Ntrk2/Lrrn4/Foxo6/Prnp/Foxp2/Apbb1/Cdk5/Mapt/Chst10/C1ql1/Adcy8/Atp8a1/Igf2/Apoe/Tnr/Cux2/Crebbp/Kalrn/Kat2a/Gpi1/Glp1r/Ppp1r1b/Klk8/Shank1/Adcy3/Jun/Kctd16/Ntsr1/Crtc1/Tacr1/Nfatc4/…			mmu05202	Transcriptional misregulation in cancer	0.367152	1.73539	9.50529e-05	0.00331735	Etv1/Prom1/Jmjd1c/H3f3b/Flt3/Ccnt1/Fli1/Ddx5/Tlx3/Cdkn1b/Aff1/Per2/Dot1l/Tgfbr2/Bcl6/Fut8/Six4/Bmp2k/Nsd2/Meis1/Bmi1/Max/Flt1/Hhex/Mmp9/Sp1/Lmo2/Ss18/Cd86/Il1r2/Nfkb1/Jup/Mitf/Fus/Maf/Fcgr1/Elk4/Gadd45a/Cebpa/Spi1/Uty/Klf3/Ddb2/Pml/Ss18l1/Lyl1/Id2/Cdkn1a/Etv6/Sin3a/Pax3/Six1/Pax8/Ewsr1/Nr4a3/Runx1t1/Cdkn2c/Nfkbiz/Ccnt2/Hdac2/Birc3
GO:0032727	positive regulation of interferon-alpha production	0.690422	2.2802	1.02635e-06	0.000521302	Ptpn22/Zc3hav1/Tlr3/Flt3/Tlr7/Dhx36/Tlr4/Ddx3x/Stat1/Traf3ip3/Ifih1/Rigi/Irf5/Hmgb1/Setd2/Irf3/Dhx9			mmu04380	Osteoclast differentiation	0.384514	1.73773	0.000196055	0.00611061	Mapk12/Camk4/Pik3r3/Fcgr3/Itpr3/Tgfb2/Atp2a3/Itpr1/Nfkb2/Stat2/Lilrb4a/Pik3ca/Tyrobp/Tgfbr2/Ncf1/Btk/Stat1/Atp2a2/Tgfbr1/Map3k14/Fcgr2b/Creb1/Traf6/Ifnar1/Fcgr4/Nfkb1/Mitf/Fcgr1/Ncf2/Tgfb1/Mapk9/Tmem64/Spi1
GO:0007612	learning	-0.375563	-1.8708	1.01944e-06	0.000521302	Vdac1/Gpr88/Slc8a3/Vdac3/Htt/Srcin1/Gria1/Grm7/Pgrmc1/Slc12a5/Tafa2/Tacr3/App/Brsk1/Git1/Abl2/Pde8b/Nrgn/Oprk1/Srf/Nts/Nrxn2/Tbr1/Ntrk2/Lrrn4/Foxp2/Apbb1/Cdk5/Chst10/C1ql1/Atp8a1/Tnr/Kalrn/Glp1r/Ppp1r1b/Shank1/Adcy3/Jun/Ntsr1/Tacr1/Atp1a3/Dgki/Nptx2/Cacna1e/Ctnnd2/B3gat1/Rin1/Oprl1/Jph3/D130043K22Rik/Rapgef3/Gabra5/Ndrg4/Cntnap2/Sgk1/Cartpt/Prkar2b/Tuba1a/Mtor/Ppp1r9b/Grin2b/Cacna1c/Th/Map1a/Synp…			mmu05169	Epstein-Barr virus infection	0.340413	1.64274	0.000210107	0.00611061	Mapk12/Pik3r3/Cxcl10/Lyn/Nfkb2/Icam1/Itgal/Vim/Stat2/Pik3ca/H2-D1/Cir1/Ccne2/Cdkn1b/Nfkbie/Cd44/B2m/Btk/Rb1/Sap30/E2f2/Psmd11/Psmd12/Stat1/Eif2ak2/Tlr2/Oas2/Map3k14/Traf6/Rigi/Ifnar1/Usp7/Nfkb1/Tapbp/Irak1/Bcl2l11/Gadd45a/Mapk9/Ccnd3/Ikbke/Ddb2/Psmd7/Psmc6/H2-T23/Irf3/Ripk1/Cdkn1a/Hes1/Casp8/Isg15/Irf9/Sin3a/Cdk2/Mapk13/Ikbkb/E2f1/Psmd1/Fas/Hdac2/Skp2
GO:0007218	neuropeptide signaling pathway	-0.481593	-2.10342	1.39315e-06	0.000653174	Gpr165/Sort1/Oprk1/Sstr3/Npff/Gpr83/Nts/Ntsr2/Ucn3/Nmbr/Rapgef2/Glra2/Agrp/Npy1r/Rxfp3/Galr3/Npffr1/Glp1r/Gpr149/Ntsr1/Sstr4/Prok2/Oprl1/Ecel1/Pcsk1n/Tac2/Nmur2/Cartpt/Cckbr/Sstr5/Npy2r/Mchr1/Brs3/Pdyn/Tac1/Sstr1			mmu04082	Neuroactive ligand signaling	-0.329853	-1.59855	0.000356979	0.00958353	Chat/Chrna6/Grin2d/Chrna7/Adora2b/Gabrg1/P2ry6/Oprm1/Ache/Adora3/Gng12/Drd3/Gabrb3/Gnb1/Htr4/Adra2b/Htr2c/P2rx6/Drd1/Prkaca/Prkcg/Prkacb/Gnao1/Slc6a3/Slc32a1/Slc6a9/Drd5/Chrna3/Plcb2/Grin3b/Gabrq/Gria1/Grm7/Htr5a/Gna11/Tacr3/Htr5b/Gabra3/Adra2a/Grm2/Oprk1/Chrm4/Gnb5/Chrm3/Htr3a/Chrm2/Slc17a8/Gng3/Adcy8/Gnas/Agrp/Htr2b/Gabrg3/Gnai2/Adcy3/Htr1d/Grik3/Gabbr1/Tacr1/Prkca/Grin3a/Oprl1/Slc17a6/Gabra5/T…
GO:0099173	postsynapse organization	-0.325744	-1.70637	1.61933e-06	0.000704988	Ghsr/Dpysl2/Xlr4a/Git1/Abl2/Akt1/Agrn/Ephb1/Iqsec3/Rac3/Camk2b/Dlg5/Baiap2/Fyn/Lrrc4b/Grid1/Map1b/Nrxn2/Cttn/Ephb3/Ror2/Cfl1/Arf1/Asap1/Prnp/Zdhhc8/Cdk5/Epha5/Marcks/Sorbs2/Mark2/Arhgap22/Apoe/Cux2/Ube2m/Neurl1a/Kalrn/Csmd2/Abhd17a/Prickle2/Shank1/Gap43/Actg1/Actn2/Mfn2/Ctnnd2/Lrfn1/Kif1a/Wnt5a/Palm/Myo5b/Numbl/Zdhhc12/Musk/Itpka/Cntnap2/Psd/Dcx/Dock10/Nrp2/Prickle1/Tanc2/C1ql2/Lzts3/Dok7/Ptprs/B…			mmu04081	Hormone signaling	-0.326868	-1.58408	0.000460999	0.011492	Adra2a/Oprk1/Sstr3/Ghrh/Trhr/Gnb5/Ucn3/Gna12/Gng3/Adcy8/Igf2/Gnas/Glp1r/Gnai2/Lepr/Adcy3/Amhr2/Sstr4/Oxt/Oprl1/Rapgef3/Vip/Ramp1/Mc4r/Adra1a/Cckbr/Sstr5/Sst/Adra2c/Src/Gng7/Pik3cd/Oxtr/Thra/Avpr1a/Cck/Adrb1/Mchr1/Ramp3/Gnb2/Irs4/Adcy2/Pdyn/Adra1b/Drd2/Sstr1/Gng4/Trh/Adcy5
GO:0002440	production of molecular mediator of immune response	0.375974	1.84093	2.31268e-06	0.000939721	Icosl/Ptpn22/Ephb2/Rif1/Kit/Tgfb2/Tlr3/Lilrb4a/Tlr7/Tfrc/Malt1/Rsad2/Pkp3/Kmt5b/Dhx36/Tlr4/Pagr1a/Pms2/Bcl6/B2m/Atg5/Apoa2/Btk/Ptprc/Sema7a/Nsd2/Ezh2/Tlr2/Lgals4/Nbn/Fcgr2b/Nlrp3/Traf6/Mapkapk2/Ube2j1/Sanbr/Atad5/Rigi/Irf5/Cd86/Hfe/Prkdc/Shld3/Casp4/Yy1/Ighm/Tnfrsf4/Ripk2/Tgfb1/Bst2/Tgfb3/Shld1/Rnf168/Il13ra1/Msh2/Il1r1/Nod1/Angpt1/Il2rg/Parp3/Rev1/Sirt1/Polb/Pcyt1a/Sash3/Ppl/Msh6			mmu05205	Proteoglycans in cancer	0.317625	1.54643	0.000590981	0.0128908	Mapk12/Pik3r3/Msn/Itpr3/Tgfb2/Itpr1/Hbegf/Pxn/Pik3ca/Ddx5/Dcn/Ptch1/Rock1/Mmp2/Fzd7/Fzd1/Hif1a/Tlr4/Cd44/Egfr/Itgb1/Vegfa/Sos2/Vav3/Plce1/Wnt3/Ank1/Wnt8b/Tlr2/Pdpk1/Rock2/Sdc1/Wnt7a/Mmp9/Fzd4/Braf/Fgfr1/Rdx/Sos1/Rps6kb2/Frs2
GO:0002697	regulation of immune effector process	0.329312	1.72238	2.54759e-06	0.000970471	A2m/Ptpn22/Crtam/Appl2/Ephb2/Rif1/Il20rb/Lyn/Fcgr3/Kit/Pglyrp1/Serping1/Tgfb2/Tlr3/Lbp/Lilrb4a/Tlr7/H2-D1/Itgb2/Crhr1/Tfrc/Malt1/Rsad2/Pkp3/Kmt5b/Tyrobp/Dhx36/Tlr4/Cfh/Pagr1a/Pms2/Bcl6/Lgals3/Stxbp2/B2m/Atg5/Fgl2/Ncf1/Apoa2/Btk/Ptprc/Sema7a/Was/Nsd2/Havcr2/Cd300a/Tlr2/Cd24a/Pdpk1/Nectin4/Stat5b/Fcgr2b/Dhx58/Nlrp3/Traf6/Mapkapk2/Ube2j1/Nckap1l/Atad5/Vamp8/Rigi/Cd46/Irf5/Rc3h2/Zbtb7b/Dusp10/Unc13d/…			mmu05014	Amyotrophic lateral sclerosis	-0.281523	-1.48901	0.000560443	0.0128908	Chchd10/Spg11/Pink1/Psmc5/Pfn2/Cox7a2/Ndufb3/Ambra1/Atp5f1b/Atp5mc1/Dnah5/Nup107/Apaf1/Ubqln2/Psmb1/Ndufb11/Psmc1/Tomm40/Psma5/Psmb7/Vdac1/Bcl2/Gle1/Tuba8/Fig4/Dnal1/Ndufb7/Ndufa11/Ndufb9/Gria1/Dctn2/Ulk2/Nup62/Ang/Sdhb/Psmd9/Ndufc1/Klc2/Ppp3r2/Atg13/Becn1/Dctn6/Psmd14/Atp5f1e/Dctn1/Cox5b/Psmb6/Casp3/Gpx1/Ndufs3/Cox7a2l/Dnah14/Ndufs7/mt-Nd4l/Dnai1/Psmd3/Psmb4/Ppp3cc/Psma7/Wdr41/Atp5f1c/Tubb2b/Ndu…
GO:0050890	cognition	-0.30928	-1.65043	2.71994e-06	0.000975177	Prrt1/Vdac1/Gpr88/Itga8/Slc8a3/Vdac3/Htt/Srcin1/Mdk/Cyp7b1/Gria1/Grm7/Pgrmc1/Arc/Trem2/Slc12a5/Tafa2/Dop1b/Tacr3/App/Brsk1/Large1/Ghsr/Git1/Abl2/Rcan1/Ttbk1/Casp3/Pde8b/Nrgn/Oprk1/Srf/Ncam1/Gpr155/Itga5/Nts/Sobp/Pla2g6/Ulk4/Nrxn2/Tbr1/Ntrk2/Lrrn4/Foxo6/Prnp/Foxp2/Apbb1/Cdk5/Mapt/Jakmip1/Chst10/C1ql1/Adcy8/Atp8a1/Igf2/Apoe/Tnr/Cux2/Gnas/Crebbp/Kalrn/Kat2a/Gpi1/Glp1r/Ppp1r1b/Klk8/Shank1/Adcy3/Jun/K…			mmu04060	Cytokine-cytokine receptor interaction	0.332937	1.57144	0.000879901	0.0180639	Tnfsf9/Il16/Il22b/Il20rb/Cxcl10/Gdf10/Il17re/Csf2rb/Tgfb2/Bmp5/Il3ra/Tnfsf10/Gdf7/Tgfbr2/Il22/Eda2r/Il15ra/Tgfbr1/Ackr4/Acvrl1/Inhbb/Ppbp/Tnfrsf12a/Il6ra/Bmpr1a/Ccl3/Cd70/Ifnar1/Il1r2/Ccr5/Thpo/Prlr/Csf3r/Cxcl16/Il6st/Tnfrsf4/Tgfb1/Tgfb3/Il13ra1/Il10ra/Il1r1/Bmpr1b/Tnfsf8/Il2rg
GO:0007416	synapse assembly	-0.328927	-1.71691	3.83812e-06	0.00129963	App/Large1/Ghsr/Dpysl2/Ptpn13/Gabra3/Agrn/Ephb1/Rac3/Plxnb1/Adgrl1/Dlg5/Slitrk1/Lrrc4b/Bsn/Map1b/Nrxn2/Ntrk2/Ephb3/Ptk2/Akap5/Lingo2/Vstm5/Slitrk5/Cbln2/Zdhhc8/Cdk5/Lin7b/Sdk1/Snca/Thbs2/Mapt/Cux2/Ube2m/Neurl1a/Robo1/Sema4a/Csmd2/Lrfn3/Igsf11/Gabrg3/Gpc4/Prickle2/Iqsec2/L1cam/Sdk2/Gap43/Prkca/Slitrk6/Efnb3/Rtn4rl2/Oxt/Lrfn1/Wnt5a/Lrtm2/Palm/Gabra5/Numbl/Zdhhc12/Musk/Cbln4/Cntnap2/Psd/Dcx/Efnb1/Ds…			mmu04933	AGE-RAGE signaling pathway in diabetic complications	0.382656	1.68143	0.000977353	0.0189498	Mapk12/Pik3r3/Plcb4/Tgfb2/Icam1/Pik3ca/Col4a6/Mmp2/Cdkn1b/Tgfbr2/Cybb/Vegfa/Plce1/Stat1/Vcam1/Col4a3/Tgfbr1/Nos3/Stat5b/Plcb3/Nfkb1/Tgfb1/Pim1/Sele/Mapk9/Tgfb3/Col4a5
GO:0048167	regulation of synaptic plasticity	-0.337631	-1.73591	4.12391e-06	0.00132291	App/Ywhag/Brsk1/Large1/Cplx2/Camk2g/Grip1/Nrgn/Camk2b/Grm2/Srf/Gsg1l/Sorcs1/Baiap2/Unc13b/Grid1/Map1b/Mapk1/Ntrk2/Chrna2/Kcnq3/Akap5/Cfl1/Rapgef2/Arf1/Gipc1/Anapc2/Prnp/Cdk5/Snca/Vamp2/Mapt/Adcy8/Apoe/Tnr/Neurl1a/Slc24a1/Kat2a/Igsf11/Iqsec2/Crtc1/Nfatc4/Grin3a/Ager/Mgll/Atp1a3/Dgki/Calhm2/Shisa9/Ppfia3/Ctnnd2/Rin1/Jph3/Rasgrf1/Prkar1b/Sqstm1/Musk/Itpka/Snap47/Ptpn5/Lzts1/Lrrtm1/Syp/Grin2b/Hras/Ma…			mmu04814	Motor proteins	-0.328209	-1.58413	0.00122178	0.0224421	Klc2/Dctn6/Kifc3/Dctn1/Kif3b/Dnai4/Dnah14/Tnnc1/Myl6b/Dnai1/Tubb2b/Kif4/Actr1b/Tubb4b/Dctn3/Tuba1b/Myh2/Tnnt2/Dync1li1/Kif26a/Dnal4/Klc1/Kif17/Acta1/Actg1/Klc3/Kif14/Tubb6/Myo18a/Tuba4a/Dnah7a/Myo15b/Kif1a/Myh4/Myo5b/Myh7/Tubd1/Tuba1a/Kif21b/Tnnt1/Dync1h1/Dync1i1/Dnah1/Tubb5/Tubb3/Dynll1/Myo18b/Tubb2a/Myo16
GO:0051607	defense response to virus	0.33689	1.71495	6.44743e-06	0.00196486	Ptpn22/Cxcl10/Zc3hav1/Tlr3/Trim7/Stat2/Tlr7/Ifitm3/Rsad2/Oasl1/Smarca5/Dhx36/Gbp4/Trim12c/Dhx15/Ifit1/Ifit3/Traf3ip1/Itch/Atg5/Fgl2/Ptprc/Zmpste24/Trim34a/Nck1/Trim30d/Parp9/Stat1/Eif2ak2/Polr3k/Rnf135/Traf3ip3/Rb1cc1/Irgm1/Oas2/Map3k14/Ifitm2/Eif2ak4/Dhx58/Nlrc5/Nlrp3/Traf6/Ifih1/Vamp8/Rigi/Irf5/Atg14/Ifnar1/Unc13d/Cd86/Oasl2/Zcchc3/Trim30a/Ndufaf4/Ube2f/Fv1/Trim13/Gpr108/Bst2/Usp18/Rnf26/Rtp4/I…			mmu04540	Gap junction	-0.386958	-1.62937	0.00227317	0.0320933	Gucy1b1/Mapk1/Pdgfc/Pdgfra/Tubb2b/Tubb4b/Tuba1b/Adcy8/Gnas/Map2k1/Htr2b/Gnai2/Adcy3/Prkca/Egf/Tubb6/Tuba4a/Gucy1a1/Tuba1a/Pdgfrb/Hras/Src/Adrb1/Tubb5/Adcy2/Tubb3/Drd2/Tubb2a/Mapk3/Adcy5
GO:0099560	synaptic membrane adhesion	-0.569231	-2.16262	8.54206e-06	0.00236654	Slitrk1/Lrrc4b/Cadm4/Slitrk5/Lrfn3/Gpc4/Tenm3/Ptprs/Ntng1/Lrfn4/Pcdh17/Lrfn5/Ptprf/Tenm4/Elfn1/Elfn2/Mdga1/Pcdh8			mmu04218	Cellular senescence	0.331378	1.56333	0.00222029	0.0320933	Mapk12/Pik3r3/Trpv4/Itpr3/Tgfb2/Itpr1/Pik3ca/H2-D1/Ccne2/Lin9/Tgfbr2/Nfatc3/Hipk1/Foxo3/Rb1/Chek1/E2f2/Ccnb2/Trpm7/Tgfbr1/Zfp36l1/Nbn/Fbxw11/Mre11a/Mapkapk2/Foxm1/Hipk3/Hus1/Nfkb1/Tgfb1/Gadd45a/Tgfb3/Ccnd3/Atr/Lin52/Chek2/H2-T23/Cdkn1a/Rad50/Capn2/Sirt1/Kras/Cdk2/Mapk13/E2f1/Ppp1cc/Ppp1ccb/E2f4/Cdk1/Rbl1/Itpr2/Nras/Lin54
GO:0007409	axonogenesis	-0.281825	-1.5396	8.49666e-06	0.00236654	Crabp2/App/Brsk1/Pip5k1c/Smurf1/Ednra/Gbx1/Adcy10/Vax1/Agrn/Ephb1/Slit3/Rac3/Nkx6-1/Srf/Plxnb1/Lama3/Ncam1/Sema3a/Golga2/Lmo4/Rnd2/Map2/Sema3c/Nova2/Etv4/Slitrk1/Auts2/Map1b/Arhgef25/Shh/Cttn/Tbr1/Lamc1/Hmcn2/Ntrk2/Ephb3/Col25a1/Bmp7/Ptk2/Tubb2b/Arhgap32/Dpysl5/Slitrk5/Anapc2/Apc/Isl1/Apbb1/Cdk5/Ilk/Epha5/Limk1/Mark2/Mapt/Lhx2/Shtn1/Fezf2/Foxg1/Apoe/Mt3/Tnr/Snap91/Kalrn/Robo1/Sema4a/Sema6b/Afg3l2…			mmu04621	NOD-like receptor signaling pathway	0.333871	1.55728	0.00229894	0.0320933	Mapk12/Itpr3/Pkn2/Plcb4/Naip5/Itpr1/Stat2/Gbp3/Tlr4/Cybb/Naip6/Atg5/Stat1/Mfn1/Trpm7/Dhx33/Dnm1l/Irgm1/Oas2/Plcb3/Gpsm3/Nlrp3/Traf6/Trpm2/Xiap/Ifnar1/Casp12/Nfkb1/Casp4/Ripk2/Mapk9/Antxr1/Ikbke/Brcc3/Gbp5/Nod1/Irf3/Ripk1/Casp8/Nampt/Gbp2/Antxr2/Irf9/Rhoa/Mapk13/Tab3/Ikbkb/Trip6/Gbp7
GO:0045089	positive regulation of innate immune response	0.311452	1.63915	9.51148e-06	0.00252054	Ptpn22/Crtam/Appl2/Lyn/Hmgb2/Lats1/Zc3hav1/Tlr3/Lbp/Trim62/Tlr7/Gbp3/Mmp2/Smpdl3a/Rsad2/Oasl1/Tyrobp/Trim12c/Tlr4/Itch/Btk/Dpp8/Ddx3x/Ranbp2/Trim30d/Havcr2/Parp9/Tmem126a/Stmp1/Mfhas1/Cd300a/Ifi209/Eif2ak2/Tlr2/Dhx33/Pdpk1/Rnf135/Traf3ip3/Fpr2/Tlr13/Irgm1/Stat5b/Zdhhc5/Xrcc6/Dhx58/Rps6ka3/Nlrc5/Nlrp10/Nlrp3/Rictor/Traf6/Rbm47/Mapkapk2/Ifih1/Rigi/Irf5/Xiap/Lamp2/Pik3ap1/Ap3b1/Cd86/Cpt1a/Zcchc3/Ppp…			mmu04110	Cell cycle	0.333783	1.55416	0.00214629	0.0320933	Tgfb2/Smc3/Ppp2r1b/Cdc14b/Ccne2/Cdkn1b/Rb1/Chek1/E2f2/Ccnb2/Wapl/Pds5a/Orc3/Stag2/Smc1a/Orc4/Mad2l1/Nipbl/Mcm4/Cdc7/Prkdc/Atrx/Tgfb1/Gadd45a/Tgfb3/Ccnd3/Wee2/Atr/Bub3/Chek2/Ep300/Anapc10/Cdkn1a/Mcm5/Pttg1/Cdk2/E2f1/Cdkn2c/Rad21/E2f4/Hdac2/Skp2/Orc2/Cdk1/Rbl1/Esco1/Ppp2r5e/Anapc1/Ccnh/Cdc25b/Mcm7/Ddx11/Cdc27/Ccnd1/Mcm2/Espl1/Ccne1/Cul1/Ppp2r5c/Tfdp2/Sgo1/Ywhaq/Ppp2r5d/E2f5/Mcm3/Cdc25a/Pds5b/Atm/Mt…
GO:0002218	activation of innate immune response	0.323565	1.6785	1.02725e-05	0.00260878	Ptpn22/Appl2/Lyn/Lats1/Zc3hav1/Tlr3/Lbp/Tlr7/Gbp3/Smpdl3a/Rsad2/Oasl1/Tyrobp/Trim12c/Tlr4/Itch/Btk/Dpp8/Ddx3x/Ranbp2/Trim30d/Havcr2/Tmem126a/Stmp1/Mfhas1/Cd300a/Ifi209/Eif2ak2/Tlr2/Dhx33/Pdpk1/Rnf135/Traf3ip3/Tlr13/Irgm1/Zdhhc5/Xrcc6/Dhx58/Rps6ka3/Nlrp10/Nlrp3/Rictor/Traf6/Mapkapk2/Ifih1/Rigi/Irf5/Xiap/Lamp2/Pik3ap1/Ap3b1/Cd86/Cpt1a/Zcchc3/Ppp6c/Trim30a/Irak1/Prkdc/Lats2/Nr1h3/Gpr108/Casp4/Washc4…			mmu05020	Prion disease	-0.287857	-1.45977	0.00223895	0.0320933	Psmc5/Cox7a2/Ndufb3/Atp5f1b/Atp5mc1/Prkaca/Prkacb/Apaf1/Psmb1/Ndufb11/Hspa1b/Psmc1/Psma5/Psmb7/Vdac1/Pik3r2/Tuba8/Vdac3/Ndufb7/Grin3b/Cacna1d/Ndufa11/Ndufb9/Sdhb/Atf6b/Psmd9/Ndufc1/Klc2/Ppp3r2/Psmd14/Atp5f1e/Cox5b/Psmb6/Casp3/Ndufs3/Cox7a2l/Ncam1/Ndufs7/mt-Nd4l/Fyn/Psmd3/Psmb4/Mapk1/Lamc1/Ppp3cc/Cacna1b/Psma7/Atp5f1c/Tubb2b/Ndufs6/Ndufa1/Prnp/Sod1/Casp9/Uqcr10/Tubb4b/Ndufa8/Tuba1b/Psmb3/Ndufb5/Uq…
GO:0032607	interferon-alpha production	0.634893	2.20209	1.27678e-05	0.00297715	Ptpn22/Zc3hav1/Tlr3/Flt3/Tlr7/Dhx36/Gbp4/Tlr4/Ddx3x/Havcr2/Stat1/Traf3ip3/Ifih1/Rigi/Irf5/Hmgb1/Setd2/Irf3/Dhx9			mmu05010	Alzheimer disease	-0.259708	-1.3756	0.00223414	0.0320933	Psmc5/Cox7a2/Ndufb3/Ambra1/Atp5f1b/Atp5mc1/Aph1c/Apaf1/Psmb1/Ndufb11/Slc39a10/Psmc1/Ppid/Psma5/Psmb7/Vdac1/Calm3/Plcb2/Pik3r2/Slc39a11/Tuba8/Vdac3/Frat2/Ndufb7/Atp2a1/Cacna1d/Wnt9a/Ndufa11/Ndufb9/Slc39a8/Ulk2/Sdhb/Psmd9/Ndufc1/Klc2/Ppp3r2/Atg13/Becn1/Psmd14/App/Atp5f1e/Cox5b/Akt1/Psmb6/Casp3/Ndufs3/Cox7a2l/Ndufs7/mt-Nd4l/Psmd3/Wnt10a/Psmb4/Mapk1/Ppp3cc/Psma7/Chrm3/Atp5f1c/Wnt16/Tubb2b/Ndufs6/Nduf…
GO:0032647	regulation of interferon-alpha production	0.634893	2.20209	1.27678e-05	0.00297715	Ptpn22/Zc3hav1/Tlr3/Flt3/Tlr7/Dhx36/Gbp4/Tlr4/Ddx3x/Havcr2/Stat1/Traf3ip3/Ifih1/Rigi/Irf5/Hmgb1/Setd2/Irf3/Dhx9			mmu03040	Spliceosome	0.326303	1.54442	0.00366861	0.049244	Srsf1/Prpf38b/Ddx5/Srsf10/Prpf40a/Dhx15/Hnrnpu/Crnkl1/Ddx46/Rbm25/Ddx42/Srsf4/Thoc2l/Tcerg1/Gm25596/Prpf4/Txnl4a/Hnrnpa3/Gm23205/Snrpc/Thoc2/Prpf6/U2surp/Prpf38a/Gm25328/Srsf2/Sf3a3/Fus/Dhx8/Sf3b1/Lsm2/Bcas2/Ppih/Srsf6/Tra2a/Dhx16/Rbm22/Hnrnpk/Tra2b/Snrpd1/Cdc40/Thoc1/Gm23318/Gm25047/Magohb/Srsf5/Snrnp27/Acin1/Yju2/Cwc25
GO:0032481	positive regulation of type I interferon production	0.449792	1.97803	1.3227e-05	0.00297715	Ptpn22/Hmgb2/Zc3hav1/Tlr3/Flt3/Tlr7/Tyrobp/Dhx36/Gbp4/Tlr4/Btk/Ddx3x/Stat1/Tlr2/Dhx33/Rnf135/Traf3ip3/Oas2/Dhx58/Traf6/Ifih1/Rigi/Irf5/Xiap/Ifnar1/Zcchc3/Irak1/Kat8/Hmgb1/Ikbke/Ticam2/Setd2/Rnf39/Irf3/Isg15/Dhx9
GO:0008306	associative learning	-0.394218	-1.85333	1.36768e-05	0.00297715	Htt/Srcin1/Gria1/Grm7/Pgrmc1/Tafa2/Tacr3/App/Brsk1/Abl2/Pde8b/Nrgn/Oprk1/Srf/Nts/Tbr1/Lrrn4/Apbb1/Cdk5/Tnr/Glp1r/Ppp1r1b/Shank1/Adcy3/Ntsr1/Tacr1/Atp1a3/Nptx2/Cacna1e/B3gat1/Rin1/Oprl1/Rapgef3/Gabra5/Ndrg4/Cntnap2/Sgk1/Cartpt/Tuba1a/Mtor/Grin2b/Cacna1c/Map1a/Synpo/Cck/B4galt2/Syngap1/Pianp/Adra1b/Tac1/Drd2/Pde1b/Rgs14/Meis2
GO:0050795	regulation of behavior	-0.421223	-1.91197	1.46579e-05	0.00308069	Mdk/Gria1/Uts2/Tacr3/Ghsr/Rspo1/Ift88/Oprk1/Zfhx3/Ghrh/Ada/Nts/Fto/Apoe/Agrp/Htr2b/Ahi1/Lepr/Htr1d/Ntsr1/Oprl1/Ptger3/Mc4r/Cartpt/Npas2/Cckbr/Mtor/Htr1a/Baiap3/Cck/Adrb1/Npy2r/Mchr1/Dlg4/Hdac4/Retn/Drd2/Slc24a4/Adora2a/Dbn1/Trh
GO:0002263	cell activation involved in immune response	0.333809	1.69529	1.88731e-05	0.0037107	Icosl/Rora/Rif1/Lyn/Kit/Rorc/Pglyrp1/Lbp/Icam1/Itgal/Lilrb4a/Itgb2/Crhr1/Milr1/Tfrc/Malt1/Kmt5b/Tyrobp/Sema6d/Tlr4/Ptgdr/Pagr1a/Pms2/Bcl6/Lgals3/Stxbp2/Fgl2/Btk/Ptprc/Kctd9/Nsd2/Havcr2/Cd300a/Pdpk1/Nbn/Eif2ak4/Rab27a/Nlrp3/Myo1f/Il6ra/Nckap1l/Sanbr/Ccl3/Atad5/Vamp8/Lcp1/Cd46/Gpr183/Lat/Rc3h2/Atp7a/Zbtb7b/Fcgr4/Unc13d/Entpd7/Shld3/Scnn1b/Ripk2/Tgfb1/Snap23/Itgb8/Hmgb1/Shld1/Spi1/Rnf168/Msh2/Slfn2/…
GO:0007626	locomotory behavior	-0.325914	-1.6781	1.83318e-05	0.0037107	App/Myg1/Large1/Ghsr/Git1/Abl2/Gbx1/Rcan1/Casp3/Oprk1/Zfhx3/Nts/Sobp/Ulk4/Htra2/Cacna1b/Nr3c2/Klhl1/Sod1/Zdhhc8/Snca/Mapt/Fezf2/Adcy8/Apoe/Tnr/Kalrn/Npy1r/Pum1/Bsx/Tal1/Fkrp/Lepr/Ppp1r1b/Espn/Ntsr1/Slitrk6/Atp1a3/Efnb3/Minar2/Cacna1e/Astn1/Nkx2-1/Oprl1/Rasd2/Cntnap2/Dscam/Pbx3/Cartpt/Npas2/Atg7/Tuba1a/Sez6l/Pcdh15/Rogdi/Mtor/Lrrtm1/Chrna4/Cacna1c/Gng7/Spg21/Th/Tmbim4/Gaa/Npy2r/B4galt2/Dlg4/Uchl1/…
GO:0031349	positive regulation of defense response	0.287229	1.55209	2.1099e-05	0.00401869	Ptpn22/Crtam/Appl2/Il16/Cnr1/Lyn/Hmgb2/Fcgr3/Pde5a/Trpv4/Ctss/Lats1/Zc3hav1/Tlr3/Lbp/Trim62/Tlr7/Gbp3/Mmp2/Smpdl3a/Rsad2/Oasl1/Tyrobp/Il22/Trim12c/Tlr4/Ctsc/Itch/Btk/Dpp8/Ddx3x/Ranbp2/Trim30d/Havcr2/Parp9/Tmem126a/Stmp1/Mfhas1/Cd300a/Ifi209/Eif2ak2/Tlr2/Cd24a/Dhx33/Pdpk1/Rnf135/Traf3ip3/Fpr2/Tlr13/Irgm1/Stat5b/Zdhhc5/Xrcc6/Dhx58/Rps6ka3/Nlrc5/Nlrp10/Gpsm3/Nlrp3/Rictor/Traf6/Rbm47/Mapkapk2/Ifih1/C…
GO:0051954	positive regulation of amine transport	-0.502816	-2.00879	2.24554e-05	0.00402546	Slc17a8/Nat8l/Gabbr1/Ntsr1/Oxt/Cartpt/Grin2b/Dtnbp1/Oxtr/Avpr1a/Cck/Npy2r/Htr6/Stx1a/Rab3b/Drd2/Adora2a/Trh
GO:0051962	positive regulation of nervous system development	-0.298665	-1.58748	2.18375e-05	0.00402546	Ttbk1/Agrn/Ephb1/Grip1/Bag1/Nap1l1/Camk2b/Nkx6-1/Srf/Plxnb1/Golga2/Adgrl1/Bin1/Dlg5/Rnd2/Baiap2/Slitrk1/Lrrc4b/Map1b/Shh/Ntrk2/Ephb3/Bex1/Ptk2/Akap5/Lingo2/Trim32/Arhgap32/Vstm5/Slitrk5/Anapc2/Cbln2/Bmp2/Xrcc4/Runx2/Ilk/Limk1/Marcks/Thbs2/Mapt/Shtn1/Foxg1/Apoe/Cux2/Neurl1a/Olig2/Snap91/Kalrn/Robo1/Sema4a/Smarcd3/Map2k1/Fbxo31/Iqsec2/Twf2/Map6/L1cam/Prkca/Slitrk6/Rtn4rl2/Mfn2/Lpar3/Ctnnd2/Oxt/Otp/…
GO:0032728	positive regulation of interferon-beta production	0.539849	2.03698	2.44875e-05	0.00402773	Ptpn22/Hmgb2/Zc3hav1/Tlr3/Tlr7/Tlr4/Ddx3x/Tlr2/Rnf135/Traf3ip3/Oas2/Ifih1/Rigi/Irf5/Ifnar1/Hmgb1/Irf3/Isg15/Dhx9
GO:0032635	interleukin-6 production	0.386745	1.81246	2.50861e-05	0.00402773	Ptpn22/Tnfsf9/Il16/Trpv4/Afap1l2/Tlr3/Lbp/Flt3/Tlr7/Aqp4/Tut4/Tyrobp/Ncl/Tlr4/Btk/Havcr2/Tlr2/Cd24a/Prg4/C1qtnf3/Nlrp10/Traf6/Mapkapk2/Il6ra/Nckap1l/Ifih1/Cd47/Rigi/Pou2f2/Trim30a/Ccr5/Ripk2/Tgfb1/Tmem106a/Hmgb1/Ticam2/Arhgef2/Lgals9/Nod1/C5ar2/Selenos/Dhx9/Foxj1/Capn2/Mapk13/Cd84
GO:0032675	regulation of interleukin-6 production	0.386745	1.81246	2.50861e-05	0.00402773	Ptpn22/Tnfsf9/Il16/Trpv4/Afap1l2/Tlr3/Lbp/Flt3/Tlr7/Aqp4/Tut4/Tyrobp/Ncl/Tlr4/Btk/Havcr2/Tlr2/Cd24a/Prg4/C1qtnf3/Nlrp10/Traf6/Mapkapk2/Il6ra/Nckap1l/Ifih1/Cd47/Rigi/Pou2f2/Trim30a/Ccr5/Ripk2/Tgfb1/Tmem106a/Hmgb1/Ticam2/Arhgef2/Lgals9/Nod1/C5ar2/Selenos/Dhx9/Foxj1/Capn2/Mapk13/Cd84
GO:0071222	cellular response to lipopolysaccharide	0.351812	1.72191	2.51113e-05	0.00402773	Ptpn22/Ephb2/Cxcl10/Lyn/Hmgb2/Lbp/Vim/Cdk19/Adam9/Pxn/Lilrb4a/Gbp3/Cd68/Malt1/Ldoc1/Tut4/Ncl/Trim12c/Tlr4/B2m/Slc12a2/Lcn2/Trim30d/Havcr2/Gbp6/Stat1/Abca1/Nos3/Irgm1/Ppbp/Nlrp3/Traf6/Fcgr4/Cd86/Nfkb1/Akap8/Trim30a/Irak1/Ccr5/Nr1h3/Cxcl16/Ripk2/Hmgb1/Ticam2/Spi1/Hadhb/Star/Abcb1a/Gbp5/Mtdh/Selenos/Irf3/Cd274/Plscr4/Irf8/Kmo/Dab2ip/Gbp2/Capn2/Epsti1/Ppard/Rhoa/Cd84/Ednrb/Nfkbiz/Arid5a/Cxcl5/Plaa
GO:0009152	purine ribonucleotide biosynthetic process	-0.375565	-1.81914	2.63471e-05	0.00411758	Ndufb3/Atp5f1b/Atp5mc1/Gucy2e/Ampd2/Atp5me/Ndufb11/Atp5mf/Pnp/Ndufb7/Nppc/Nme7/Ndufa11/Ndufb9/Trem2/Sdhb/Ndufc1/Atp5mg/Gucy2f/Atp5f1e/Adcy10/Gucy2g/Ndufs3/Ndufs7/mt-Nd4l/Ada/Prps2/Gucy1b1/Ak1/Atp5f1c/Ndufs6/Gmpr/Ndufa1/Aldoa/Ndufa8/Adcy8/Aprt/Ndufb5/Map2k1/Impdh1/Ndufv1/Adcy3/Ntsr1/Eno1/Ndufa2/Ndufs5/Ndufa13/Papss1/Ptger3/Gucy1a1/Pid1/Cartpt/Nme1/Uqcc3/Atp5po/Ndufb6/Ppara/Atic/Guk1/Papss2/Ndufs8/…
GO:0002366	leukocyte activation involved in immune response	0.340536	1.72229	2.77974e-05	0.00423563	Icosl/Rora/Rif1/Lyn/Kit/Rorc/Pglyrp1/Lbp/Icam1/Itgal/Lilrb4a/Itgb2/Crhr1/Milr1/Tfrc/Malt1/Kmt5b/Tyrobp/Sema6d/Tlr4/Ptgdr/Pagr1a/Pms2/Bcl6/Lgals3/Stxbp2/Fgl2/Btk/Ptprc/Kctd9/Nsd2/Havcr2/Cd300a/Pdpk1/Nbn/Eif2ak4/Rab27a/Nlrp3/Myo1f/Il6ra/Nckap1l/Sanbr/Ccl3/Atad5/Vamp8/Lcp1/Cd46/Gpr183/Lat/Rc3h2/Atp7a/Zbtb7b/Fcgr4/Unc13d/Entpd7/Shld3/Scnn1b/Ripk2/Tgfb1/Snap23/Itgb8/Hmgb1/Shld1/Spi1/Rnf168/Msh2/Slfn2/…
GO:0007188	adenylate cyclase-modulating G protein-coupled receptor signaling pathway	-0.332405	-1.67688	2.86868e-05	0.00426453	Grm7/Gna14/Calcr/Htr5a/Pde2a/Gna11/Htr5b/App/Pth1r/Apln/Ednra/Gpr12/Adra2a/Grm2/Oprk1/Chrm4/Ghrh/Ucn3/Gna12/Chrm3/Akap5/Rapgef2/Chrm2/Aplnr/Gpr101/Adcy8/Ptgfr/Gnas/Ptger1/Mrgpre/Glp1r/Gnai2/Adcy3/Pde4a/Htr1d/Gsk3a/Grik3/Gabbr1/Pth2r/Sstr4/Mrap2/Lpar3/Oprl1/Prkar1b/Chlsn/Palm/Ptger3/Vip/S1pr3/Ramp1/Mc4r/Adra1a/Prkar2b/Sstr5/Adra2c/Gnaz/Chrm1/Htr1a/Rack1/Adrb1/Npy2r/Aplp1/Ramp3/Gpr6/Adcy2/Adcyap1r1…
GO:0002833	positive regulation of response to biotic stimulus	0.298627	1.58698	3.23114e-05	0.004689	Ptpn22/Crtam/Appl2/Lyn/Hmgb2/Lats1/Zc3hav1/Tlr3/Lbp/Trim62/Tlr7/Gbp3/Mmp2/Smpdl3a/Rsad2/Oasl1/Tyrobp/Trim12c/Tlr4/Itch/Btk/Dpp8/Ddx3x/Ranbp2/Trim30d/Havcr2/Parp9/Tmem126a/Stmp1/Mfhas1/Cd300a/Ifi209/Eif2ak2/Tlr2/Cd24a/Dhx33/Pdpk1/Rnf135/Traf3ip3/Fpr2/Tlr13/Irgm1/Stat5b/Zdhhc5/Xrcc6/Dhx58/Rps6ka3/Nlrc5/Nlrp10/Nlrp3/Rictor/Traf6/Rbm47/Mapkapk2/Ifih1/Rigi/Irf5/Xiap/Lamp2/Pik3ap1/Ap3b1/Cd86/Cpt1a/Zcch…
GO:0072091	regulation of stem cell proliferation	0.445352	1.95542	3.41592e-05	0.00470608	Sox9/Hmgb2/Kitl/Ptch1/Tgfbr2/Nfib/Hnrnpu/Vegfa/Ptprc/N4bp2l2/Prl2c3/Eif2ak2/Sox17/Tgfbr1/Zfp36l1/Irgm1/Fermt1/Foxm1/Hoxa3/Cd109/Prrx1/Fgfr1/Fgf9/Tial1/Thpo/Nfya/Tgfb1/Pim1/Cebpa/Nf1/Fermt2/Ago3/Wnt10b
GO:0032479	regulation of type I interferon production	0.399197	1.86338	3.47455e-05	0.00470608	Ptpn22/Hmgb2/Zc3hav1/Tlr3/Flt3/Tlr7/Tyrobp/Dhx36/Gbp4/Tlr4/Traf3ip1/Atg5/Btk/Ddx3x/Havcr2/Stat1/Tlr2/Dhx33/Rnf135/Traf3ip3/Irgm1/Oas2/Dhx58/Qki/Traf6/Ifih1/Rigi/Irf5/Xiap/Ifnar1/Zcchc3/Irak1/Yy1/Peli3/Rnf26/Kat8/Hmgb1/Ikbke/Ticam2/Setd2/Rnf39/Nploc4/Irf3/Irf8/Ppm1b/Isg15/Dhx9
GO:0032606	type I interferon production	0.399197	1.86338	3.47455e-05	0.00470608	Ptpn22/Hmgb2/Zc3hav1/Tlr3/Flt3/Tlr7/Tyrobp/Dhx36/Gbp4/Tlr4/Traf3ip1/Atg5/Btk/Ddx3x/Havcr2/Stat1/Tlr2/Dhx33/Rnf135/Traf3ip3/Irgm1/Oas2/Dhx58/Qki/Traf6/Ifih1/Rigi/Irf5/Xiap/Ifnar1/Zcchc3/Irak1/Yy1/Peli3/Rnf26/Kat8/Hmgb1/Ikbke/Ticam2/Setd2/Rnf39/Nploc4/Irf3/Irf8/Ppm1b/Isg15/Dhx9
GO:0034341	response to type II interferon	0.397854	1.83605	3.71129e-05	0.00481283	Tlr3/Vim/Atl2/Ifitm3/Gbp3/Aqp4/Sp100/Gbp4/Gbp9/Tlr4/Parp14/Syncrip/Stxbp2/Was/Atf3/Gbp6/Parp9/Stat1/Tlr2/Irgm1/Capg/Ifitm2/Kif16b/Nlrc5/Eprs1/Vamp8/Kif5b/Cd47/Ptpn2/Slk/Cxcl16/Daxx/Bst2/Pim1/Sec61a1/Ifitm7/Myo1c/Star/Cdc42ep4/Gbp5/Dnaja3/Irf8/Rab43/Gbp2/Edn1/Epsti1/Atl3/Ciita/Trim21/Gbp7/Slc22a5/Cdc42ep2/Zyx/Rps6kb1/Actr3/Med1/Gch1
GO:0071216	cellular response to biotic stimulus	0.340165	1.69659	3.68354e-05	0.00481283	Ptpn22/Ephb2/Cxcl10/Lyn/Hmgb2/Lbp/Vim/Cdk19/Adam9/Pxn/Lilrb4a/Gbp3/Cd68/Malt1/Ldoc1/Tut4/Ncl/Trim12c/Tlr4/B2m/Slc12a2/Lcn2/Btk/Zmpste24/Ppp1r15b/Trim30d/Havcr2/Gbp6/Stat1/Abca1/Tlr2/Nos3/Irgm1/Fcgr2b/Smc1a/Ppbp/Nlrp3/Traf6/Irf5/Fcgr4/Cd86/Nfkb1/Akap8/Trim30a/Irak1/Ccr5/Nr1h3/Cxcl16/Bcl2l11/Ripk2/Rbm14/Hmgb1/Ticam2/Spi1/Hadhb/Star/Abcb1a/Gbp5/Mtdh/Selenos/Irf3/Cd274/Plscr4/Irf8/Kmo/Dab2ip/Gbp2/Cap…
GO:0001819	positive regulation of cytokine production	0.287055	1.5374	4.14213e-05	0.00515231	Icosl/Rora/Ptpn22/Crtam/Lurap1/Tnfsf9/Ephb2/Il16/Il20rb/Hmgb2/Fcgr3/Kit/Trpv4/Afap1l2/Zc3hav1/Naip5/Tlr3/Lbp/Flt3/Tlr7/Malt1/Rsad2/Tut4/Hif1a/Tyrobp/Dhx36/Gbp4/Ncl/Tlr4/Cybb/Ccm2l/Chil5/B2m/Prkd2/Apoa2/Btk/Ddx3x/Ptprc/Sema7a/Sorl1/C3ar1/Havcr2/Stat1/Stmp1/Eif2ak2/Tlr2/Abcc8/Dhx33/Rock2/Rnf135/Traf3ip3/C1qtnf3/Stat5b/Oas2/Fcgr2b/Fermt1/Dhx58/Cyp2j6/Creb1/Nlrp10/Gpsm3/Nlrp3/Traf6/Rbm47/Mapkapk2/Il6…
GO:0006397	mRNA processing	0.279699	1.51613	4.11074e-05	0.00515231	Srsf1/Prpf38b/Trmt6/Pcf11/Sltm/Ddx5/Cir1/Scaf11/Snrnp48/Dhx36/Ncl/Srsf10/Prpf40a/Dhx15/Ern1/Lgals3/Syncrip/Khdc4/Arglu1/Hnrnpu/Elavl4/Crnkl1/Ddx46/Rbm41/Rbm25/Ddx42/Mbnl1/Srsf4/Thoc2l/Luc7l3/Srrm1/Srrm4/Pan3/Tcerg1/Leo1/Tent4a/Angel2/Ptbp3/Gm25596/Ahcyl1/Fam50a/Ivns1abp/Scaf8/Ythdc1/Prpf4/Zfp36l1/Rbm38/Wdr77/Mfap1a/Dyrk1a/Papolb/Luc7l2/Txnl4a/Qki/Prpf4b/Rbm47/Hnrnpa3/Gm23205/Ecd/Prpf39/Iws1/Mbnl2…
GO:0046390	ribose phosphate biosynthetic process	-0.353072	-1.73944	4.3345e-05	0.00518015	Ndufb3/Atp5f1b/Atp5mc1/Gucy2e/Ampd2/Atp5me/Ndufb11/Atp5mf/Pnp/Ndufb7/Nppc/Pygl/Nme7/Ndufa11/Ndufb9/Trem2/Sdhb/Ndufc1/Atp5mg/Gucy2f/Upp2/Atp5f1e/Adcy10/Gucy2g/Ndufs3/Ndufs7/mt-Nd4l/Ada/Prpsap2/Prps2/Gucy1b1/Ak1/Atp5f1c/Ndufs6/Gmpr/Ndufa1/Aldoa/Dck/Ndufa8/Adcy8/Aprt/Ndufb5/Map2k1/Impdh1/Ndufv1/Adcy3/Ntsr1/Eno1/Ndufa2/Ndufs5/Ndufa13/Papss1/Ptger3/Gucy1a1/Pid1/Cartpt/Nme1/Uqcc3/Atp5po/Ndufb6/Uprt/Ppa…
GO:0048813	dendrite morphogenesis	-0.338628	-1.67831	4.30743e-05	0.00518015	Ephb1/Grip1/Gorasp1/Camk2b/Sema3a/Baiap2/Fyn/Ephb3/Akap5/Cfl1/Dpysl5/Rapgef2/Slitrk5/Anapc2/Cdk5/Ilk/Epha5/Marcks/Cux2/Kalrn/Robo1/Fbxo31/Shank1/Map6/Nfatc4/Mfn2/Ctnnd2/Kif1a/Wnt5a/Myo5b/Phactr1/Numbl/Itpka/Cntnap2/Sgk1/Dcx/Celsr2/Dscam/Dock10/Atg7/Tanc2/Lzts3/Bhlhb9/Cit/Lzts1/Mink1/Dtnbp1/Camk2a/Sult4a1/Cdk5r1/Lrp4/Dlg4/Ngef/Ptprf/Dbn1/Nsmf/Sipa1l1/Arhgap33
GO:0050806	positive regulation of synaptic transmission	-0.343592	-1.71753	4.5995e-05	0.00539114	Mapk1/Cacna1b/Ntrk2/Ptk2/Akap5/Ror2/Prnp/Snca/Ncs1/Vamp2/Adcy8/Glul/Apoe/Tnr/Slc24a1/Igsf11/Iqsec2/Crtc1/Tacr1/Nfatc4/Ager/Efnb3/Oxt/Prkar1b/Sqstm1/Zdhhc12/Musk/Snap47/Adra1a/Cckbr/Ptpn5/Slc4a8/Lrrtm1/Grin2b/Dtnbp1/Oxtr/Baiap3/Adrb1/Mpp2/Flot1/Dlg4/Kctd13/Slc8a2/Cyp46a1/Htr6/Ptk2b/Stx1a/Retn/Htr7/Tac1/Drd2/Shisa7/Adora2a/Rasgrf2/Rgs14/Cacng8/Cacng3/Hap1
GO:0071219	cellular response to molecule of bacterial origin	0.351815	1.73203	4.72697e-05	0.00543602	Ptpn22/Ephb2/Cxcl10/Lyn/Hmgb2/Lbp/Vim/Cdk19/Adam9/Pxn/Lilrb4a/Gbp3/Cd68/Malt1/Ldoc1/Tut4/Ncl/Trim12c/Tlr4/B2m/Slc12a2/Lcn2/Trim30d/Havcr2/Gbp6/Stat1/Abca1/Tlr2/Nos3/Irgm1/Fcgr2b/Ppbp/Nlrp3/Traf6/Irf5/Fcgr4/Cd86/Nfkb1/Akap8/Trim30a/Irak1/Ccr5/Nr1h3/Cxcl16/Ripk2/Hmgb1/Ticam2/Spi1/Hadhb/Star/Abcb1a/Gbp5/Mtdh/Selenos/Irf3/Cd274/Plscr4/Irf8/Kmo/Dab2ip/Gbp2/Capn2/Epsti1/Ppard/Rhoa/Cd84/Ednrb/Nfkbiz/Ari…
GO:0002700	regulation of production of molecular mediator of immune response	0.378163	1.81596	5.18743e-05	0.00585507	Ptpn22/Ephb2/Rif1/Kit/Tgfb2/Tlr3/Lilrb4a/Tlr7/Tfrc/Malt1/Rsad2/Pkp3/Kmt5b/Dhx36/Tlr4/Pagr1a/Pms2/Bcl6/B2m/Atg5/Apoa2/Btk/Ptprc/Sema7a/Nsd2/Tlr2/Fcgr2b/Nlrp3/Traf6/Mapkapk2/Ube2j1/Atad5/Rigi/Irf5/Cd86/Hfe/Prkdc/Shld3/Casp4/Ighm/Tnfrsf4/Ripk2/Tgfb1/Bst2/Tgfb3/Shld1/Il13ra1/Msh2/Il1r1/Nod1/Angpt1/Il2rg/Parp3
GO:0007187	G protein-coupled receptor signaling pathway, coupled to cyclic nucleotide second messenger	-0.606827	-2.11555	6.38962e-05	0.00707273	Htr4/Htr2c/Drd1/Agtr2/Htr5a/Htr5b/Pth1r/Chrm4/Chrm3/Chrm2/Galr3/Htr2b/Htr1d/Chrm1/Htr1a/Fzd2/Htr6/Htr7/Hrh3
GO:0006310	DNA recombination	0.308842	1.60212	6.49833e-05	0.00707273	Icosl/Sycp1/Topbp1/Rif1/Hmgb2/Rec8/Zgrf1/Mcm9/Tfrc/Nsmce4a/Mcm8/Ing3/Kmt5b/Ercc4/Pagr1a/Pms2/Bcl6/Pif1/Rpa1/Msh5/Smc6/Ptprc/Chek1/Was/Mbtd1/Nsd2/Rev3l/Tep1/Ezh2/Epc1/Mdc1/Sycp3/Brd8/Epc2/Apex2/Nbn/Dyrk1a/Csnk2a1/Xrcc6/Mre11a/Nipbl/Ercc5/Helq/Sanbr/Xrcc2/Atad5/Helb/Ppp4r2/Rad51/Recql4/Rtel1/Hus1/Mcm4/Cdc7/H1f4/Zfyve26/Prkdc/Rmi1/Fus/Shld3/Top2b/Ooep/Yy1/Tgfb1/Hrob/Hmgb1/Shld1/Rnf168/Msh2/Actl6a/Ra…
GO:0048592	eye morphogenesis	0.365886	1.76644	7.35849e-05	0.00786842	Calb1/Sox9/Olfm3/Ephb2/Tfap2b/Prom1/Rab37/Lhx1/Megf11/Tfap2a/Pax2/Aldh1a1/Ccdc66/Pax6/Rs1/Prox1/Alms1/Mfrp/Hcn1/Cdon/Hif1a/Cfh/Hipk1/Vegfa/Col8a1/Otx2/Phactr4/Ski/Fat1/Cited2/Meis1/Flt1/Stra6/Jag1/Nipbl/Bdnf/Sp1/Efemp1/Frs2/Zhx2/Irx5
GO:0042755	eating behavior	-0.527754	-2.07413	7.61893e-05	0.00800645	Agrp/Bsx/Lepr/Tacr1/Oxt/Oprl1/C1qtnf4/Mc4r/Nmur2/Cartpt/Col6a1/Mtor/Th/Oxtr/Cck/Uchl1/Hrh3/Slc24a4/Adora2a/Trh
GO:0009260	ribonucleotide biosynthetic process	-0.355123	-1.74583	7.85157e-05	0.00811107	Ndufb3/Atp5f1b/Atp5mc1/Gucy2e/Ampd2/Atp5me/Ndufb11/Atp5mf/Pnp/Ndufb7/Nppc/Nme7/Ndufa11/Ndufb9/Trem2/Sdhb/Ndufc1/Atp5mg/Gucy2f/Upp2/Atp5f1e/Adcy10/Gucy2g/Ndufs3/Ndufs7/mt-Nd4l/Ada/Prps2/Gucy1b1/Ak1/Atp5f1c/Ndufs6/Gmpr/Ndufa1/Aldoa/Dck/Ndufa8/Adcy8/Aprt/Ndufb5/Map2k1/Impdh1/Ndufv1/Adcy3/Ntsr1/Eno1/Ndufa2/Ndufs5/Ndufa13/Papss1/Ptger3/Gucy1a1/Pid1/Cartpt/Nme1/Uqcc3/Atp5po/Ndufb6/Uprt/Ppara/Atic/Guk1/…
GO:0099003	vesicle-mediated transport in synapse	-0.29837	-1.56292	7.99948e-05	0.00812614	Actb/Cdh2/Rab4a/Cadps/Mapk10/Stxbp1/Drd3/Dnajc6/Ap3s1/Stxbp3/Dnajc5/Rab3a/Ap2a2/Syt11/Pfn2/Prkaca/Syt1/Nedd4l/Atp6v1f/Prkcg/Rab7/Atp6v1d/Npy/Slc32a1/Tspan7/Rnf216/Tprg1l/Efnb2/Mylk/Calm3/Cacna1d/Tor1a/Clta/Arc/Unc13a/Otof/Dnm2/Trim9/Rims3/Dnm1/Brsk1/Cplx2/Rnf220/Pip5k1c/Syn3/Git1/Scamp5/Sv2a/Atp6v0c/Casp3/Atp6v1b2/Grip1/Gsg1l/Bin1/Tmub1/Unc13b/Sncb/Bsn/Ppp3cc/Cacna1b/Septin5/Akap5/Syt10/Ap2a1/Cdk…
GO:0007631	feeding behavior	-0.388662	-1.79717	8.27632e-05	0.00826953	Tacr3/App/Ghsr/Rspo1/Ift88/Apln/Oprk1/Gpr83/Tbr1/Ntrk2/Fto/Agrp/Npy1r/Bsx/Glp1r/Lepr/Tacr1/Mrap2/Nkx2-1/Oxt/Oprl1/C1qtnf4/Mc4r/Nmur2/Cartpt/Col6a1/Mtor/Grin2b/Th/Htr1a/Oxtr/Mmp17/Cck/Npy2r/Mchr1/Uchl1/Retn/Hrh3/Drd2/Slc24a4/Adora2a/Trh
GO:0010469	regulation of signaling receptor activity	-0.629185	-2.09865	8.77479e-05	0.00862619	Cnih3/Mink1/Tafa4/Grem2/Crhbp/Cnih2/Dapk1/Shisa7/Cacng8/Cacng3
GO:0051289	protein homotetramerization	0.491364	1.95329	9.12407e-05	0.00864723	Sycp1/Appl2/Shmt1/Itpr3/Usp16/Itpr1/Kcnj12/Gnmt/Aqp4/Hcn1/Kcnt1/B2m/Mcoln1/Acacb/Trpm7/Tdo2/Trpm2/Vasp
GO:0051963	regulation of synapse assembly	-0.33063	-1.66501	9.3637e-05	0.00864723	Rap2a/App/Ghsr/Dpysl2/Ptpn13/Agrn/Ephb1/Rac3/Adgrl1/Dlg5/Slitrk1/Lrrc4b/Map1b/Nrxn2/Ntrk2/Ephb3/Ptk2/Lingo2/Vstm5/Slitrk5/Cbln2/Zdhhc8/Lin7b/Snca/Thbs2/Cux2/Ube2m/Neurl1a/Robo1/Sema4a/Lrfn3/Igsf11/Gpc4/Prickle2/Iqsec2/L1cam/Prkca/Slitrk6/Efnb3/Rtn4rl2/Oxt/Lrfn1/Wnt5a/Lrtm2/Palm/Numbl/Musk/Psd/Dcx/Dock10/Prickle1/Lzts3/Ptprs/Bhlhb9/Lzts1/Lrrtm1/Ppp1r9b/Oxtr/Lrfn4/Lrp4/Dlg4/Slit1/Lrfn5/Flrt1/Ptk2b/…
GO:1903311	regulation of mRNA metabolic process	0.311544	1.60583	8.98708e-05	0.00864723	Srsf1/Zc3hav1/Sltm/Vim/Piwil2/Ddx5/Rock1/Rida/Pkp3/Tut4/Dhx36/Ncl/Srsf10/Syncrip/Arglu1/Hnrnpu/Elavl4/Vegfa/Fam76b/Rbm25/Mbnl1/Srsf4/Samd4/Srrm1/Srrm4/Pan3/Tent4a/Angel2/Ptbp3/Ahcyl1/Rock2/Ythdc1/Zfp36l1/Rbm38/Wdr77/Dyrk1a/Patl1/Qki/Rbm47/Mapkapk2/Paip1/Bag4/Iws1/Mbnl2/Secisbp2/Nsrp1/Rc3h2/Tbrg4/Dcp2/Son/Srsf2/Zbtb7a/Senp1/Ptbp1/Upf3b/Fus/Tut7/Dcp1b/Nova1/Pan2/Npm1/Srsf6/Kat8/Mapk9/Igf2bp3/Rbm14/…
GO:0001818	negative regulation of cytokine production	0.313959	1.59273	9.34628e-05	0.00864723	Homer3/Ptpn22/Appl2/Ephb2/Il20rb/Abcd2/Pglyrp1/Tgfb2/Klf4/Lbp/Flt3/Aqp4/Serpinb1b/Tyrobp/Gbp4/Il22/Tlr4/Bcl6/Traf3ip1/Abcd1/Srgn/Atg5/Apoa2/Btk/Ptprc/Havcr2/Ezh2/Tlr2/Cd24a/Prg4/Errfi1/C1qtnf3/Irgm1/Fcgr2b/Flt1/Dhx58/Furin/Inhbb/Qki/Nlrp3/Nckap1l/Fgfr1/Slc2a10/Xiap/Apod/Suz12/Il1r2/Nfkb1/Akap8/Ubr5/Hfe/Trim30a/Yy1/Cd59a/Tnfrsf4/Tgfb1/Bst2/Peli3/Kat8/Tgfb3/Clec4a2/Hmgb1/Ticam2/Anxa4/Lgals9/Pml/Ang…
GO:0010631	epithelial cell migration	0.411037	1.81368	0.000103159	0.0093844	Sox9/Kit/Pkn2/Fgf7/Kitl/Fat2/Kank2/Tgfb2/Ptprr/Hbegf/Arhgap5/Vim/Adam9/Prox1/Ctsh/Rock1/Hif1a/Tgfbr2/Mcc/Tgfbr3/Capn7/Fermt1/Itga3/Mmp9/Enpp2/Dusp10/Glipr2/Snai1/Epb41l4b
GO:0002285	lymphocyte activation involved in immune response	0.354243	1.71687	0.00011162	0.0100047	Icosl/Rora/Rif1/Rorc/Pglyrp1/Icam1/Itgal/Lilrb4a/Tfrc/Malt1/Kmt5b/Tyrobp/Sema6d/Tlr4/Pagr1a/Pms2/Bcl6/Lgals3/Fgl2/Ptprc/Kctd9/Nsd2/Havcr2/Nbn/Eif2ak4/Rab27a/Nlrp3/Il6ra/Nckap1l/Sanbr/Atad5/Lcp1/Cd46/Gpr183/Rc3h2/Atp7a/Zbtb7b/Fcgr4/Unc13d/Entpd7/Shld3/Ripk2/Tgfb1/Itgb8/Hmgb1/Shld1/Spi1/Rnf168/Msh2/Slfn2/Lgals9/Ep300/Brd2/Parp3/Irf8/Loxl3/Irf9/Pcyt1a/Enpp1/Msh6
GO:0002758	innate immune response-activating signaling pathway	0.311607	1.5986	0.000120544	0.0106481	Ptpn22/Appl2/Lyn/Lats1/Zc3hav1/Tlr3/Lbp/Tlr7/Smpdl3a/Rsad2/Oasl1/Tyrobp/Tlr4/Itch/Btk/Dpp8/Ddx3x/Ranbp2/Havcr2/Tmem126a/Stmp1/Mfhas1/Cd300a/Eif2ak2/Tlr2/Dhx33/Pdpk1/Rnf135/Traf3ip3/Tlr13/Irgm1/Zdhhc5/Dhx58/Rps6ka3/Nlrp3/Rictor/Traf6/Mapkapk2/Ifih1/Rigi/Irf5/Xiap/Lamp2/Pik3ap1/Ap3b1/Cd86/Cpt1a/Zcchc3/Ppp6c/Trim30a/Irak1/Prkdc/Lats2/Nr1h3/Gpr108/Casp4/Washc4/Cav1/Ripk2/Peli3/Cd300lf/Hmgb1/Ticam2/Ta…
GO:0006164	purine nucleotide biosynthetic process	-0.339572	-1.67547	0.000128041	0.0111487	Ndufb3/Atp5f1b/Nadk/Atp5mc1/Gucy2e/Ampd2/Atp5me/Ndufb11/Atp5mf/Pnp/Ndufb7/Nppc/Nadsyn1/Nme7/Ndufa11/Ndufb9/Trem2/Sdhb/Afmid/Ndufc1/Atp5mg/Gucy2f/Atp5f1e/Adcy10/Gucy2g/Ndufs3/Ndufs7/mt-Nd4l/Ada/Prpsap2/Prps2/Gucy1b1/Ak1/Atp5f1c/Ndufs6/Gmpr/Ndufa1/Aldoa/Dck/Ndufa8/Adcy8/Aprt/Ndufb5/Map2k1/Impdh1/Ndufv1/Adcy3/Ntsr1/Eno1/Ndufa2/Ndufs5/Ndufa13/Papss1/Ptger3/Gucy1a1/Pid1/Cartpt/Nme1/Uqcc3/Atp5po/Ndufb6…
GO:0002274	myeloid leukocyte activation	0.33194	1.64746	0.000134529	0.0115487	Rora/Camk4/Tmem229b/Tnfsf9/Il16/Cnr1/Lyn/Fcgr3/Kit/Tlr3/Lbp/Adam9/Lilrb4a/Itgb2/Crhr1/Milr1/Tyrobp/Tgfbr2/Tlr4/Ptgdr/Ctsc/Stxbp2/Fam76b/Ptpre/Btk/Kmt2e/Havcr2/Adgrf5/Mfhas1/Cd300a/Tlr2/Pdpk1/Plpp6/Fpr2/Irgm1/Traf6/Myo1f/Ccl3/Vamp8/Lat/Fcgr4/Unc13d/Nr1h3/Scnn1b/Cd48/Tgfb1/Snap23/Cebpa/Cd300lf/Itgb8/Tmem106a/Hmgb1/Spi1/Lgals9/Pi4k2a/Slc7a2/Nampt/Dnase1/Epsti1/Lcp2/Cd84/Nr4a3/Hspa4/Flt3l/Jmjd6/Pirb/…
GO:0048588	developmental cell growth	-0.311298	-1.60869	0.000139632	0.0116583	Cxcr4/Agtr2/Cpne9/Alcam/Rgma/Olfm1/Rtn4r/Fstl4/Impact/Pi16/Ndel1/Atg16l1/Ulk2/Unc13a/Ddr1/Ssna1/Dnm2/Nin/Crabp2/App/Smurf1/Ednra/Syt3/Adcy10/Bcan/Slit3/Nkx6-1/Srf/Sema3a/Rnd2/Map2/Slitrk1/Auts2/Map1b/Akap6/Cttn/Akap13/Arhgap32/Anapc2/Cdk5/Ilk/Limk1/Sorbs2/Postn/Mapt/Lhx2/Shtn1/Apoe/Mt3/Tnr/Robo1/Spag6/Fdps/Gsk3a/Twf2/L1cam/Mgll/Lpar3/Ctnnd2/Ndn/Wasf1/Wnt5a/Bcl11a/Cdh4/D130043K22Rik/Myo5b/Rnf157/D…
GO:0002250	adaptive immune response	0.292134	1.53257	0.000139058	0.0116583	Icosl/Rora/Camk4/Crtam/Ephb2/Rif1/Zbtb46/Il20rb/Lyn/Fcgr3/Rnf19b/Csf2rb/Rorc/Nfkb2/Icam1/Lilrb4a/H2-D1/Ctsh/Tfrc/Malt1/Rsad2/Kmt5b/Pagr1a/Pms2/Ctsc/Bcl6/Cd44/Vegfa/B2m/Prkd2/Mcoln1/Gzmm/Btk/Ptprc/Was/C3ar1/Nsd2/Havcr2/Myo1g/Cd24a/Nbn/Fcgr2b/Eif2ak4/Rab27a/Jag1/Nlrp10/Nlrp3/Traf6/Il6ra/Nckap1l/Sanbr/Atad5/Cd70/Cd46/Gpr183/Lat/Rc3h2/Zbtb7b/Fcgr4/Dusp10/Unc13d/Cd86/Hfe/Entpd7/Shld3/AI182371/Fcgr1/Ig…
GO:0000028	ribosomal small subunit assembly	-0.681032	-2.09461	0.000148266	0.0119346	Rps28/Rcc1l/Rps6/Rps27/Abt1/Fau/Rps19/Rps15/Rrp7a/Rpsa/Rps14
GO:0090132	epithelium migration	0.409499	1.81204	0.000150773	0.0119346	Sox9/Kit/Pkn2/Fgf7/Kitl/Fat2/Kank2/Tgfb2/Ptprr/Hbegf/Arhgap5/Vim/Adam9/Prox1/Ctsh/Rock1/Hif1a/Tgfbr2/Mcc/Tgfbr3/Capn7/Fermt1/Itga3/Mmp9/Enpp2/Dusp10/Glipr2/Snai1/Epb41l4b
GO:0098727	maintenance of cell number	0.339265	1.66873	0.000145872	0.0119346	Sox9/Rif1/Zic1/Kit/Med14/Jmjd1c/Klf4/Pax2/Piwil2/Smc3/Prox1/Fzd7/Tead4/Tut4/Arid4b/Nfib/Selenon/Wdr62/Foxo3/Mmp24/Sap30/Loxl2/Kat6a/Hook3/Esrrb/Arid4a/Leo1/Ezh2/Ski/Stag2/Six2/Smc1a/Jag1/Nipbl/Wnt7a/Bmpr1a/Prrx1/Braf/Fgfr1/Ss18/Med12/Wdr43/Zhx2/Sinhcaf/Nfya/Sav1/Brms1/Pcm1/Spi1/Gnl3/Actl6a/Med7/Zfp322a/Lrp5/Hes1/Elavl1/Nfix/Wnt9b/Sin3a/Elf5/Pax8/Cul4a/Dpf2/Kdm3a/Yme1l1/Bcl7c/Brms1l/Sall4/Hdac2/As…
GO:0002449	lymphocyte mediated immunity	0.324522	1.62382	0.000149639	0.0119346	Icosl/Crtam/Rif1/Il20rb/Fcgr3/Rnf19b/Csf2rb/Icam1/H2-D1/Ctsh/Tfrc/Malt1/Rsad2/Kmt5b/Tyrobp/Pagr1a/Pms2/Ctsc/Bcl6/B2m/Gzmm/Btk/Ptprc/Was/Kctd9/Nsd2/Havcr2/Myo1g/Cd24a/Nectin4/Nbn/Stat5b/Fcgr2b/Rab27a/Jag1/Nlrp3/Traf6/Nckap1l/Sanbr/Atad5/Kif5b/Cd70/Cd46/Arl8b/Fcgr4/Unc13d/Hfe/Shld3/AI182371/Fcgr1/Ighm/C1ra/Cebpg/Tgfb1/C1s1/Clec2d/Hmgb1/Shld1/Rnf168/Msh2/Slfn2/Ufl1/Il1r1/Lgals9/H2-T23/Cd274/Parp3/Fo…
GO:0048593	camera-type eye morphogenesis	0.367851	1.73888	0.000161464	0.012617	Calb1/Sox9/Ephb2/Tfap2b/Prom1/Lhx1/Megf11/Tfap2a/Pax2/Aldh1a1/Ccdc66/Pax6/Rs1/Prox1/Alms1/Hcn1/Cdon/Hif1a/Cfh/Hipk1/Vegfa/Col8a1/Phactr4/Ski/Fat1/Cited2/Meis1/Flt1/Stra6/Jag1/Sp1
GO:0002444	myeloid leukocyte mediated immunity	0.415185	1.82584	0.000164807	0.0127152	Lyn/Fcgr3/Kit/Dao/Itgb2/Crhr1/Milr1/Tyrobp/Dhx36/Ptgdr/Stxbp2/Ncf1/Btk/Kmt2e/Cd300a/Pdpk1/Fcgr2b/Myo1f/Ccl3/Vamp8/Rigi/Lat/Fcgr4/Unc13d/Fcgr1/Scnn1b/Snap23/Spi1/Pi4k2a/Dnase1/Cd84/C3/Nr4a3/Cxcl5/Pla2g3/Ptafr/Hmox1/Gata2/Foxf1/Ddx21/Fcer1g/Anxa3
GO:0051937	catecholamine transport	-0.413581	-1.79985	0.000173256	0.0128774	Chrna6/Chrna7/Adora2b/Chga/Actb/Adora3/Cadps/Drd3/Rab3a/Pink1/Syt11/Drd1/Syt1/Slc6a3/Slc22a3/Xlr4b/Agtr2/Comt/Kcnb1/Tor1a/Gck/Ghsr/Xlr4a/Adra2a/Grm2/Oprk1/Snca/Smpd3/Nat8l/Nisch/Gabbr1/Hc/Oxt/Ptger3/Vip/Cartpt/Adra2c/Chrna4/Gdnf/Dtnbp1/Oxtr/Npy2r/Htr6/Stx1a/Rab3b/Hrh3/Drd2/Adora2a
GO:0060996	dendritic spine development	-0.36998	-1.74327	0.000174756	0.0128774	Arc/Slc12a5/Mapre3/Camk1/Git1/Ephb1/Camk2b/Dlg5/Baiap2/Ulk4/Ephb3/Foxo6/Cfl1/Arf1/Asap1/Cdk5/Sdk1/Epha5/Marcks/Apoe/Cux2/Neurl1a/Crebbp/Kalrn/Shank1/Grin3a/Mfn2/Ctnnd2/Kif1a/Palm/Myo5b/Itpka/Cntnap2/Dscam/Dock10/Tanc2/Lzts3/Ptprs/Bhlhb9/Mtor/Dtnbp1/Camk2a/Cdk5r1/Dlg4/Ngef/Dbn1/Sipa1l1/Arhgap33
GO:0050671	positive regulation of lymphocyte proliferation	0.377077	1.73878	0.000169795	0.0128774	Icosl/Ptpn22/Tnfsf9/Ephb2/Kitl/Itgal/Bst1/Tfrc/Tgfbr2/Tlr4/Bcl6/Cd38/Slc4a1/Btk/Vav3/Ptprc/Nck1/Havcr2/Vcam1/Cd24a/Bmi1/Irgm1/Stat5b/Traf6/Nckap1l/Atad5/Cd46/Gpr183/Cd86/Prlr/Ighm/Cd59a/Il6st/Tnfrsf4/Ripk2
GO:0009615	response to virus	0.297326	1.55734	0.000177474	0.0128774	Ptpn22/Cxcl10/Zc3hav1/Tlr3/Flt3/Trim7/Stat2/Tlr7/Ifitm3/Rsad2/Oasl1/Smarca5/Hif1a/Dhx36/Gbp4/Trim12c/Dhx15/Ifit1/Ifit3/Traf3ip1/Itch/Atg5/Fgl2/Lcn2/Ddx3x/Ptprc/Zmpste24/Kctd9/Trim34a/Nck1/Trim30d/Parp9/Stat1/Eif2ak2/Polr3k/Ivns1abp/Rnf135/Traf3ip3/Rb1cc1/Tlr13/Irgm1/Oas2/Map3k14/Ifitm2/Eif2ak4/Dhx58/Nlrc5/Nlrp3/Traf6/Aup1/Ifih1/Vamp8/Rigi/Irf5/Atg14/Ifnar1/Unc13d/Cd86/Oasl2/Nfkb1/Pou2f2/Zcchc3/Tr…
GO:1901888	regulation of cell junction assembly	-0.292249	-1.52629	0.000176282	0.0128774	Agrn/Ephb1/Rac3/Adgrl1/Dlg5/Dapk3/Slitrk1/Lrrc4b/Map1b/Nrxn2/Ntrk2/Ephb3/Ptk2/Lingo2/Cfl1/Vstm5/Rapgef2/Rps6/Slitrk5/Cbln2/Zdhhc8/Aplnr/Lin7b/Snca/Thbs2/Clasp1/Nphp1/Cux2/Ube2m/Neurl1a/Robo1/Sema4a/Lrfn3/Igsf11/Gpc4/Prickle2/Iqsec2/L1cam/Prkca/Actg1/Slitrk6/Efnb3/Rtn4rl2/Oxt/Arhgap6/Lrfn1/Wnt5a/Lrtm2/Myoc/Palm/Col16a1/Numbl/Musk/Cntnap2/Psd/Dcx/Dock10/Prickle1/Lzts3/Ptprs/Bhlhb9/Lzts1/Lrrtm1/S100…
GO:0002253	activation of immune response	0.269687	1.46067	0.000181367	0.0130051	Icosl/A2m/Ptpn22/Appl2/Lyn/Lats1/Serping1/Zc3hav1/Tlr3/Lbp/Tlr7/Gbp3/Smpdl3a/Malt1/Rsad2/Oasl1/Tyrobp/Trim12c/Tlr4/Cfh/Lgals3/Cacnb4/Cd38/Itch/Prkd2/Btk/Dpp8/Vav3/Ddx3x/Ptprc/Ranbp2/C3ar1/Nck1/Trim30d/Havcr2/Myo1g/Tmem126a/Stmp1/Mfhas1/Cd300a/Ifi209/Eif2ak2/Tlr2/Shc1/Dhx33/Pdpk1/Rnf135/Traf3ip3/Fpr2/Tlr13/Irgm1/Zdhhc5/Xrcc6/Dhx58/Rps6ka3/Nlrp10/Nlrp3/Rictor/Traf6/Mapkapk2/Nckap1l/Ifih1/Cd47/Rigi/…
GO:0042391	regulation of membrane potential	-0.267982	-1.46384	0.00020128	0.0142651	Gpr88/Tbx18/Bcl2/Calm3/Insyn1/Kcnb1/Slc8a3/Kcnh5/Grin3b/Nos1ap/Cacna1d/Kcnq1/Nrcam/Kcnc4/Gria1/Gna14/Slc39a8/Trem2/Scn4b/Gna11/Ano1/Cacna1i/Ehd3/Got1/Bok/Cngb1/Pkp2/Rims3/App/Pip5kl1/Ccn6/Popdc1/Adcy10/Akt1/Sv2a/Gabra3/Agrn/Chrnb3/Bin1/Bco2/Npff/Baiap2/Unc13b/Ntsr2/Grid1/Ucn3/Akap6/Ntrk2/Nr3c2/Chrna2/Kcnq3/Htr3a/Prelid1/Ndufs6/Kcna3/Glra2/Kcnk15/Sod1/Cdk5/Snca/Mapt/Shtn1/Gja5/Cux2/Hcn4/Gpd1l/Trpv…
GO:0017158	regulation of calcium ion-dependent exocytosis	-0.508467	-1.99591	0.000209239	0.0146588	Cadps/Stxbp1/Stxbp3/Rab3a/Syt11/Syt1/Kcnb1/Rest/Cacna1i/Trim9/Syt3/Scamp5/Adra2a/Unc13b/Cacna1b/Syt10/Arf1/Cdk5/Vamp2/Doc2g/Hyal3/Gnai2/Cdk5r2/Cbarp/Baiap3/Syt6/Stx1a/Cacna1h/Syt5/Doc2a/Syt17
GO:0099175	regulation of postsynapse organization	-0.329088	-1.63224	0.00021294	0.0147485	Srcin1/Nrcam/Crmp1/Arc/Slc12a5/Mapre3/App/Ghsr/Dpysl2/Akt1/Rac3/Camk2b/Baiap2/Fyn/Lrrc4b/Grid1/Map1b/Nrxn2/Ror2/Cfl1/Asap1/Prnp/Zdhhc8/Cdk5/Marcks/Mark2/Arhgap22/Apoe/Cux2/Ube2m/Neurl1a/Kalrn/Abhd17a/Prickle2/Mfn2/Lrfn1/Kif1a/Wnt5a/Palm/Numbl/Itpka/Psd/Dcx/Dock10/Nrp2/Prickle1/Tanc2/Lzts3/Ptprs/Bhlhb9/Lzts1/Lrrtm1/Ppp1r9b/Mink1/Grin2b/Dtnbp1/Lrfn2/Lrfn4/Cdk5r1/Ncan/Lrp4/Ngef/Ptk2b/Ptprf/Dbn1/Sipa…
GO:0062208	positive regulation of pattern recognition receptor signaling pathway	0.422626	1.82159	0.000218881	0.0149896	Ptpn22/Lats1/Zc3hav1/Lbp/Rsad2/Oasl1/Tlr4/Btk/Ddx3x/Stmp1/Mfhas1/Dhx33/Zdhhc5/Dhx58/Nlrp3/Pik3ap1/Zcchc3/Lats2/Nr1h3/Casp4/Peli3/Hmgb1/Ticam2/Tasl/Rnf115/Brcc3/Zdhhc3/Gbp5/Slc15a3/Usp50/Rnf39
GO:0050688	regulation of defense response to virus	0.469039	1.85343	0.000227824	0.0154287	Ptpn22/Zc3hav1/Gbp4/Traf3ip1/Itch/Atg5/Fgl2/Zmpste24/Parp9/Stat1/Irgm1/Eif2ak4/Rigi/Rnf26/Dtx3l/Pml/Ppm1b/Dhx9/Elmod2/Sin3a/Mul1
GO:0071346	cellular response to type II interferon	0.401577	1.77698	0.000238561	0.0155624	Tlr3/Vim/Atl2/Gbp3/Aqp4/Gbp4/Gbp9/Tlr4/Parp14/Syncrip/Stxbp2/Was/Gbp6/Parp9/Stat1/Tlr2/Irgm1/Capg/Kif16b/Nlrc5/Eprs1/Vamp8/Kif5b/Cd47/Ptpn2/Slk/Daxx/Pim1/Myo1c/Star/Cdc42ep4/Gbp5/Dnaja3/Irf8/Rab43/Gbp2/Edn1/Epsti1/Atl3/Ciita
GO:1903312	negative regulation of mRNA metabolic process	0.396059	1.76454	0.000242113	0.0155624	Srsf1/Pkp3/Srsf10/Syncrip/Hnrnpu/Elavl4/Vegfa/Fam76b/Srsf4/Tent4a/Angel2/Ptbp3/Rbm38/Dyrk1a/Qki/Rbm47/Mapkapk2/Paip1/Bag4/Secisbp2/Ptbp1/Fus/Npm1/Srsf6/Igf2bp3/Thrap3/Ikbke/Meioc/Pcbp4/Larp4b/Sfswap/Hnrnpk/Csde1/Hnrnpa2b1/Elavl1/Sap18/Dhx9/Lrpprc/E2f1/Acin1/Nbas/Arid5a/Tardbp/Cirbp/Pabpc1
GO:0002221	pattern recognition receptor signaling pathway	0.307194	1.5771	0.000238137	0.0155624	Ptpn22/Appl2/Lyn/Lats1/Zc3hav1/Tlr3/Lbp/Tlr7/Smpdl3a/Rsad2/Oasl1/Tlr4/Itch/Btk/Dpp8/Ddx3x/Ranbp2/Havcr2/Tmem126a/Stmp1/Mfhas1/Cd300a/Eif2ak2/Tlr2/Dhx33/Pdpk1/Rnf135/Traf3ip3/Tlr13/Irgm1/Zdhhc5/Dhx58/Rps6ka3/Nlrp3/Rictor/Traf6/Mapkapk2/Ifih1/Rigi/Irf5/Xiap/Lamp2/Pik3ap1/Ap3b1/Cd86/Cpt1a/Zcchc3/Ppp6c/Trim30a/Irak1/Prkdc/Lats2/Nr1h3/Gpr108/Casp4/Washc4/Cav1/Ripk2/Peli3/Cd300lf/Hmgb1/Ticam2/Tasl/Ufl1…
GO:0002460	adaptive immune response based on somatic recombination of immune receptors built from immunoglobulin superfamily domains	0.30772	1.56856	0.00023615	0.0155624	Icosl/Rora/Ephb2/Rif1/Zbtb46/Il20rb/Fcgr3/Csf2rb/Rorc/Nfkb2/Icam1/H2-D1/Ctsh/Tfrc/Malt1/Rsad2/Kmt5b/Pagr1a/Pms2/Ctsc/Bcl6/Vegfa/B2m/Gzmm/Btk/Ptprc/Was/C3ar1/Nsd2/Havcr2/Myo1g/Cd24a/Nbn/Fcgr2b/Rab27a/Jag1/Nlrp10/Nlrp3/Traf6/Il6ra/Nckap1l/Sanbr/Atad5/Cd70/Cd46/Rc3h2/Zbtb7b/Fcgr4/Unc13d/Hfe/Entpd7/Shld3/AI182371/Fcgr1/Ighm/C1ra/Ripk2/Tgfb1/C1s1/Hmgb1/Shld1/Rnf168/Adam17/Msh2/Slfn2/Ufl1/Il1r1/Ep300/H…
GO:0001667	ameboidal-type cell migration	0.304874	1.54664	0.000242563	0.0155624	Sox9/Appl2/Arhgdib/Kit/Pkn2/Fgf7/Kitl/Fat2/Kank2/Tgfb2/Tfap2a/Ptprr/Hbegf/Arhgap5/Smurf2/Vim/Adam9/Phox2b/Pax6/Prox1/Ctsh/Rock1/Mmp2/Hif1a/Tgfbr2/Sema6d/Fut8/Mcc/Itgb1/Vegfa/Tgfbr3/Sema7a/Sema3b/Phactr4/Syne2/Itga4/Sox17/Sema4b/Tgfbr1/Capn7/Fermt1/Itga3/Timp1/Bag4/Mmp9/Srgap2/Enpp2/Braf/Zfand5/Fgfr1/Sema4g/Syde1/Dusp10/Glipr2/Snai1/Gna13/Epb41l4b/Tgfb1/Arhgap4/Rffl/Folr1/Pkn3/Akap12/Dock1/Tmem201…
GO:0060042	retina morphogenesis in camera-type eye	0.432683	1.82196	0.000246595	0.0156562	Calb1/Sox9/Tfap2b/Prom1/Lhx1/Megf11/Ccdc66/Rs1/Prox1/Alms1/Hcn1/Cdon/Cfh/Hipk1
GO:0090130	tissue migration	0.397004	1.76868	0.000260892	0.0161773	Sox9/Kit/Pkn2/Fgf7/Kitl/Fat2/Kank2/Tgfb2/Ptprr/Hbegf/Arhgap5/Vim/Adam9/Prox1/Ctsh/Rock1/Hif1a/Tgfbr2/Mcc/Tgfbr3/Capn7/Fermt1/Itga3/Mmp9/Enpp2/Dusp10/Glipr2/Snai1/Epb41l4b
GO:0007613	memory	-0.342397	-1.68784	0.000262766	0.0161773	Mdk/Cyp7b1/Gria1/Grm7/Pgrmc1/Arc/Trem2/Tafa2/App/Large1/Rcan1/Srf/Itga5/Pla2g6/Ulk4/Ntrk2/Lrrn4/Foxo6/Mapt/Chst10/Adcy8/Igf2/Apoe/Cux2/Crebbp/Kalrn/Kat2a/Glp1r/Ppp1r1b/Klk8/Shank1/Kctd16/Crtc1/Tacr1/Nfatc4/Atp1a3/Oxt/Rin1/Jph3/Musk/Dcaf11/Sgk1/Tuba1a/Rogdi/Mtor/Grin2b/Dtnbp1/Th/Ehmt2/Map1a/Oxtr/Cck/Adrb1/Kcnq2/B4galt2/Slc17a7/Slc8a2/Htr7/Hrh3/Tac1/Drd2/Shisa7/Rgs14/Pak6
GO:0002764	immune response-regulating signaling pathway	0.273215	1.4714	0.000259202	0.0161773	Icosl/Ptpn22/Appl2/Il20rb/Lyn/Fcgr3/Kit/Lats1/Zc3hav1/Tlr3/Lbp/Lilrb4a/Tlr7/Ctsh/Smpdl3a/Malt1/Rsad2/Oasl1/Tyrobp/Tlr4/Lgals3/Cacnb4/Cd38/Itch/Prkd2/Btk/Dpp8/Vav3/Ddx3x/Ptprc/Ranbp2/C3ar1/Nck1/Havcr2/Myo1g/Tmem126a/Stmp1/Mfhas1/Cd300a/Eif2ak2/Tlr2/Shc1/Dhx33/Pdpk1/Rnf135/Traf3ip3/Fpr2/Tlr13/Irgm1/Fcgr2b/Zdhhc5/Dhx58/Rps6ka3/Nlrp3/Rictor/Traf6/Mapkapk2/Nckap1l/Ifih1/Cd47/Rigi/Braf/Phpt1/Sos1/Irf5/…
GO:0032760	positive regulation of tumor necrosis factor production	0.395211	1.75918	0.000268873	0.0163878	Ephb2/Fcgr3/Tlr3/Lbp/Tyrobp/Ncl/Tlr4/Cybb/Btk/Ptprc/Havcr2/Tlr2/Abcc8/Oas2/Fcgr2b/Cyp2j6/Mapkapk2/Ifih1/Ccl3/Rigi/Ccr5/Fcgr1/Ripk2/Tgfb1/Tmem106a/Hmgb1/Akap12/Adam17/Arhgef2/Lgals9/Nod1/Ripk1/Dhx9/Sash3/Cd84/Zbtb20/Arid5a/Hdac2/Twist1/Ptafr/Plcg2/Lrrk2/Il1a/Nrdc/Fcer1g
GO:0050792	regulation of viral process	0.368843	1.70216	0.000288501	0.0172394	Pkn2/Zc3hav1/Fam111a/Trim62/Ddx5/Prox1/Ifitm3/Ark2n/Rsad2/Sp100/Oasl1/Trim12c/Ifit1/Atg5/Ubp1/Ddx3x/Trim30d/Stat1/Eif2ak2/Oas2/Ifitm2/Setdb1/Furin/Ifih1/Oasl2/Trim30a/Top2b/Trim13/Bst2/Ppih/Tmem39a/Hmgb1/Ifitm7/Zfp809/Mid2/Fmr1/Isg15/Dhx9
GO:0008380	RNA splicing	0.272971	1.46809	0.000288228	0.0172394	Srsf1/Prpf38b/Kat2b/Ddx5/Cir1/Scaf11/Ccnl2/Snrnp48/Ncl/Srsf10/Prpf40a/Dhx15/Ern1/Lgals3/Syncrip/Khdc4/Arglu1/Hnrnpu/Elavl4/Crnkl1/Ddx46/Rbm41/Rbm25/Ddx42/Mbnl1/Srsf4/Ccnl1/Luc7l3/Srrm1/Srrm4/Ahnak/Tcerg1/Ptbp3/Gm25596/Tada1/Fam50a/Ivns1abp/Ythdc1/Prpf4/Rbm38/Wdr77/Mfap1a/Dyrk1a/Slc38a2/Luc7l2/Txnl4a/Qki/Prpf4b/Rtraf/Rbm47/Hnrnpa3/Gm23205/Ecd/Prpf39/Iws1/Mbnl2/Zfp638/Rbm12/Srsf11/Snrpc/Nsrp1/Thoc2…
GO:0032946	positive regulation of mononuclear cell proliferation	0.370914	1.70443	0.000298172	0.0176443	Icosl/Ptpn22/Tnfsf9/Ephb2/Kitl/Itgal/Bst1/Tfrc/Tgfbr2/Tlr4/Bcl6/Cd38/Slc4a1/Btk/Vav3/Ptprc/Nck1/Havcr2/Vcam1/Cd24a/Bmi1/Irgm1/Stat5b/Traf6/Nckap1l/Atad5/Cd46/Gpr183/Cd86/Prlr/Ighm/Cd59a/Il6st/Tnfrsf4/Ripk2
GO:0070665	positive regulation of leukocyte proliferation	0.363409	1.71039	0.000321518	0.0186633	Icosl/Ptpn22/Tnfsf9/Ephb2/Lyn/Kit/Csf2rb/Kitl/Itgal/Bst1/Tfrc/Tgfbr2/Tlr4/Bcl6/Cd38/Slc4a1/Btk/Vav3/Ptprc/Nck1/Havcr2/Vcam1/Cd24a/Bmi1/Irgm1/Stat5b/Traf6/Nckap1l/Atad5/Cd46/Gpr183/Cd86/Prlr/Ighm/Cd59a/Il6st/Tnfrsf4/Ripk2
GO:0002520	immune system development	0.326869	1.60049	0.000319088	0.0186633	Icosl/Rif1/Zbtb46/Lyn/Rorc/Ro60/Nfkb2/Flt3/Tfrc/Kmt5b/Tgfbr2/Pagr1a/Nfatc3/Pms2/Bcl6/Six4/Cacnb4/Itch/Ptprc/Zmpste24/C3ar1/Ccnb2/Nsd2/Havcr2/Ezh2/Cited2/Tgfbr1/Nbn/Stat5b/Xrcc6/Hoxb4/Pcid2/Sanbr/Hoxa3/Atad5/Braf/Rc3h2/Cd86/Nfkb1/Prkdc/Shld3/Yy1/Bcl2l11/Tgfb1/Jarid2/Hmgb1/Shld1/Rnf168/Adam17/Msh2/Marchf7/Parp3/Lrp5/Id2/Hes1/Rev1/Foxj1/Polb/Pcyt1a/Six1/Zbtb1/Msh6/Ppp2r3c
GO:0001754	eye photoreceptor cell differentiation	0.469498	1.83814	0.0003413	0.0196248	Sox9/Olfm3/Prom1/Rab37/Ccdc66/Pax6/Alms1/Mfrp/Hcn1/Cfh/Vegfa/Otx2
GO:0002702	positive regulation of production of molecular mediator of immune response	0.377194	1.71905	0.000348672	0.0196943	Ptpn22/Ephb2/Rif1/Kit/Tlr3/Tlr7/Tfrc/Malt1/Rsad2/Kmt5b/Dhx36/Tlr4/Pagr1a/Pms2/B2m/Btk/Ptprc/Sema7a/Nsd2/Tlr2/Nlrp3/Traf6/Mapkapk2/Atad5/Rigi/Irf5/Cd86/Shld3/Casp4/Tnfrsf4/Ripk2/Tgfb1/Shld1/Il13ra1/Msh2/Il1r1/Nod1
GO:0099565	chemical synaptic transmission, postsynaptic	-0.362834	-1.70447	0.000348972	0.0196943	Sv2a/Chrnb3/Npff/Baiap2/Unc13b/Ntrk2/Chrna2/Htr3a/Glra2/Cdk5/Snca/Cux2/Trpv1/Igsf11/Shank1/Ntsr1/Dgki/Prkar1b/Cacnb3/Cntnap2/Chrna4/Grin2b/Adrb1/Npy2r/Mpp2/Grip2/P2rx3/Dlg4/Begain/Cx3cl1/Slc17a7/Chrna10/Grik5/Slc8a2/Ptk2b/Stx1a/Adora2a/Dbn1/Sez6
GO:0002291	T cell activation via T cell receptor contact with antigen bound to MHC molecule on antigen presenting cell	0.73472	2.00876	0.000367631	0.020557	Icam1/Itgal/Tyrobp/Sema6d/Lgals3/Fgl2/Havcr2
GO:0000288	nuclear-transcribed mRNA catabolic process, deadenylation-dependent decay	0.487779	1.88965	0.000387001	0.0214434	Dhx36/Syncrip/Hnrnpu/Samd4/Pan3/Tent4a/Zfp36l1/Patl1/Paip1/Rc3h2/Dcp2/Dcp1b/Pan2/Csde1/Fmr1/Cnot6l/Dhx9/Rc3h1/Cnot1/Pabpc1/Tnrc6a/Hnrnpd/Cnot7/Cnot6/Tnrc6b/Cnot2/Parn/Cpeb3
GO:0045071	negative regulation of viral genome replication	0.502012	1.86043	0.000394228	0.021647	Zc3hav1/Fam111a/Prox1/Ifitm3/Rsad2/Oasl1/Eif2ak2/Oas2/Ifitm2/Setdb1/Ifih1/Oasl2/Bst2/Ifitm7/Zfp809/Isg15
GO:0006936	muscle contraction	-0.288332	-1.50217	0.000398903	0.0217082	Tacr3/Ehd3/Pkp2/Large1/Ghsr/Ednra/Adcy10/Agrn/Adra2a/Srf/Tnnc1/Bin1/Myl6b/Ada/Pla2g6/Akap6/Pgam2/Cttn/Chrm3/Ppp1r13l/Fkbp1a/Ndufs6/Aldoa/Chrm2/Sod1/Eef2/Apbb1/Myh2/Smpd3/Gja5/Tnnt2/Hcn4/Gnas/Gpd1l/Hsbp1/Trpv1/Npy1r/Stac3/Map2k1/Mb/Htr2b/Fkrp/Synm/Dsg2/Htr1d/Tacr1/Prkca/Atp1a3/Eno1/Actn2/Oxt/Prok2/Ptger3/Myh4/Myh7/Sulf2/Sgcd/Nr4a1/Gucy1a1/Adra1a/Map2k6/Adra2c/Tnnt1/Mtor/Gdnf/Cacna1c/Oxtr/Kcnip2/Ga…
GO:1903557	positive regulation of tumor necrosis factor superfamily cytokine production	0.387803	1.72775	0.000406326	0.0217242	Ephb2/Fcgr3/Tlr3/Lbp/Tyrobp/Ncl/Tlr4/Cybb/Btk/Ptprc/Havcr2/Tlr2/Abcc8/Oas2/Fcgr2b/Cyp2j6/Mapkapk2/Ifih1/Ccl3/Rigi/Ccr5/Fcgr1/Ripk2/Tgfb1/Tmem106a/Hmgb1/Akap12/Adam17/Arhgef2/Lgals9/Nod1/Ripk1/Dhx9/Sash3/Cd84/Zbtb20/Arid5a/Hdac2/Twist1/Ptafr/Plcg2/Lrrk2/Il1a/Nrdc/Fcer1g
GO:0009165	nucleotide biosynthetic process	-0.313697	-1.59159	0.000404928	0.0217242	Ampd3/Dhodh/Aspdh/Hprt1/Ndufa12/Cmpk2/Idh2/Ndufb3/Atp5f1b/Nadk/Atp5mc1/Gucy2e/Ampd2/Atp5me/Ndufb11/Ak8/Atp5mf/Pnp/Ndufb7/Nppc/Nadsyn1/Nme7/Ndufa11/Ndufb9/Trem2/Sdhb/Slc52a2/Afmid/Ndufc1/Atp5mg/Gucy2f/Upp2/Atp5f1e/Adcy10/Gucy2g/Ndufs3/Ndufs7/mt-Nd4l/Ada/Prpsap2/Prps2/Rrm2b/Gucy1b1/Ak1/Mapk1/Atp5f1c/Ndufs6/Gmpr/Ndufa1/Aldoa/Dck/Ndufa8/Adcy8/Ak5/Aprt/Ndufb5/Map2k1/Impdh1/Ndufv1/Flad1/Adcy3/Ntsr1/Eno…
GO:0099601	regulation of neurotransmitter receptor activity	-0.6896	-2.00962	0.000413742	0.0217393	Cnih3/Mink1/Crhbp/Cnih2/Dapk1/Cacng8/Cacng3
GO:0099010	modification of postsynaptic structure	-0.457266	-1.82682	0.000413717	0.0217393	Dlgap4/Cttnbp2/Filip1/Baiap2/Cttn/Ptk2/Cfl1/Rapgef2/Limk1/Marcks/Kalrn/Pdxp/Wasf1/Myo5b/Phactr1/Itpka/Rhob/Dlgap3/Mrtfb/Mrtfa/Strn4/Camkv
GO:1990138	neuron projection extension	-0.320141	-1.58616	0.000420561	0.0219087	Ndel1/Atg16l1/Ulk2/Unc13a/Ddr1/Ssna1/Dnm2/Smurf1/Ednra/Syt3/Adcy10/Bcan/Slit3/Nkx6-1/Srf/Sema3a/Map2/Slitrk1/Auts2/Map1b/Cttn/Arhgap32/Anapc2/Cdk5/Ilk/Limk1/Postn/Mapt/Lhx2/Shtn1/Apoe/Mt3/Tnr/Robo1/Spag6/Twf2/L1cam/Mgll/Ctnnd2/Ndn/Wasf1/Wnt5a/Bcl11a/Cdh4/D130043K22Rik/Myo5b/Rnf157/Dcx/Dscam/Atg7/Nrp2/Prickle1/Trim46/Ptprs/Emx1/Cit/Islr2/Slit1/Flrt1/Sema5b/Rasal1/Dbn1/Cpne5/Pak6/Syt17/Cpne6
GO:0021872	forebrain generation of neurons	-0.385283	-1.73993	0.000453416	0.0234201	Zswim6/Nr2e1/Zdhhc16/Lef1/Mettl3/Atf5/Rac3/Sema3a/Tox/Tbr1/Rapgef2/Bmp2/Fezf2/Foxg1/Robo1/Nkx2-1/Otp/Wnt5a/Bcl11b/Dclk2/Ptger3/Dcx/Sall1/Atg7/Nrp2/Uqcrq/Emx1/Ndnf/Kcnq2/Dct/Dlx1/Lhx8/Sall3/Drd2/Pex5/Arx/Dlx2/Chd5/Dlx5
GO:0048525	negative regulation of viral process	0.44633	1.81329	0.000463211	0.0235273	Zc3hav1/Fam111a/Trim62/Prox1/Ifitm3/Ark2n/Rsad2/Sp100/Oasl1/Ifit1/Ubp1/Stat1/Eif2ak2/Oas2/Ifitm2/Setdb1/Ifih1/Oasl2/Trim13/Bst2/Ifitm7/Zfp809/Mid2/Isg15
GO:0021879	forebrain neuron differentiation	-0.391722	-1.72857	0.000461228	0.0235273	Tox/Tbr1/Rapgef2/Bmp2/Fezf2/Foxg1/Robo1/Nkx2-1/Otp/Wnt5a/Bcl11b/Dclk2/Ptger3/Dcx/Sall1/Atg7/Nrp2/Uqcrq/Emx1/Ndnf/Kcnq2/Dlx1/Lhx8/Sall3/Drd2/Pex5/Arx/Dlx2/Chd5/Dlx5
GO:0099633	protein localization to postsynaptic specialization membrane	-0.449547	-1.81254	0.000480913	0.023757	Kalrn/Map2k1/Gpc4/Iqsec2/Nptx2/Musk/Cnih3/C1ql2/Dok7/Hras/Camk2a/Vwc2/Nptxr/Dlg4/Olfm2/Cacng3
GO:0099645	neurotransmitter receptor localization to postsynaptic specialization membrane	-0.449547	-1.81254	0.000480913	0.023757	Kalrn/Map2k1/Gpc4/Iqsec2/Nptx2/Musk/Cnih3/C1ql2/Dok7/Hras/Camk2a/Vwc2/Nptxr/Dlg4/Olfm2/Cacng3
GO:0071869	response to catecholamine	-0.453071	-1.81006	0.000498917	0.023757	Drd3/Htr4/Htr2c/Gm527/Drd1/Alk/Gnao1/Drd5/Comt/Htt/Gna14/Gna11/Dnm2/App/Gnb5/Rgs9/Htr3a/Gnas/Ptger1/Htr2b/Palm/Dtnbp1/Htr1a/Aplp1/Klf16/Chrna10/Htr6/Htr7/Drd2/Adcy5
GO:0120193	tight junction organization	0.425846	1.77381	0.000492538	0.023757	Ephb2/Ect2/Mpp7/Svep1/Cldn2/Patj/Rock1/Lsr/Ocln/Marveld2/Pecam1/Itgb1/Cdh1/Abcc8/Tgfbr1/Rock2/Acvrl1/Pak2/Snai1/Ext1/Ramp2/Tgfb3/Cdh5/Myo1c
GO:0061014	positive regulation of mRNA catabolic process	0.390532	1.72811	0.000479478	0.023757	Zc3hav1/Piwil2/Rock1/Rida/Tut4/Dhx36/Syncrip/Hnrnpu/Samd4/Pan3/Tent4a/Rock2/Zfp36l1/Patl1/Qki/Paip1/Rc3h2/Dcp2/Senp1/Tut7/Dcp1b/Pan2/Mapk9/Ago3/Ythdf3/Csde1/Ythdf2/Elavl1/Pnpt1/Fmr1/Cnot6l/Dhx9/Prr5l/Cul4a/Rc3h1/Tardbp/Cnot1/Pabpc1/Tnrc6a/Hnrnpd/Cnot7/Fxr1/Cnot6/Tnrc6b/Alkbh5/Celf1/Cnot2
GO:0019827	stem cell population maintenance	0.328028	1.6102	0.000498915	0.023757	Sox9/Rif1/Kit/Med14/Jmjd1c/Klf4/Pax2/Piwil2/Smc3/Prox1/Fzd7/Tead4/Tut4/Arid4b/Nfib/Wdr62/Foxo3/Mmp24/Sap30/Loxl2/Kat6a/Hook3/Esrrb/Arid4a/Leo1/Ski/Stag2/Six2/Smc1a/Jag1/Nipbl/Wnt7a/Bmpr1a/Prrx1/Braf/Fgfr1/Ss18/Med12/Wdr43/Zhx2/Sinhcaf/Nfya/Sav1/Brms1/Pcm1/Spi1/Gnl3/Actl6a/Med7/Zfp322a/Lrp5/Hes1/Elavl1/Nfix/Wnt9b/Sin3a/Elf5/Pax8/Cul4a/Dpf2/Kdm3a/Yme1l1/Bcl7c/Brms1l/Sall4/Hdac2/Aspm/Kdm2b/Cnot1/Phf…
GO:0030705	cytoskeleton-dependent intracellular transport	-0.314262	-1.57795	0.000496657	0.023757	Ift27/Arl3/Borcs6/Fez1/Htt/Nme7/Ift22/Ndel1/Atg16l1/Ssna1/Bloc1s5/Klc2/Ift57/App/Ift88/Kif3b/Ccdc88b/Map2/Bsn/Map1b/Fyco1/Copg1/Sod1/Rhot2/Mapt/Wdr19/Bbs1/Ap3b2/Hsbp1/Map2k1/Fnbp1l/Dync2i1/Bloc1s3/Klc1/Map6/Kif17/Pex14/Klc3/Wasf1/Kif1a/Lca5/Flot2/Tub/Ift25/Dync2i2/Ift140/Tuba1a/Kif21b/Prickle1/Intu/Tanc2/Trim46/Agbl4/Dync1h1/Dync1i1/Dtnbp1/Bloc1s2/F8a/Map1a/Septin9/Uchl1/Dynll1/Cnih2/Caly/Ift122/…
GO:1901293	nucleoside phosphate biosynthetic process	-0.28735	-1.49944	0.000487399	0.023757	Cad/Tmsb4x/Acaca/Ndufv3/Nagk/Ampd3/Dhodh/Amdhd2/Aspdh/Hprt1/Sirt4/Pank2/Ndufa12/Cmpk2/Idh2/Ppcdc/Coasy/Ndufb3/Atp5f1b/Bckdk/Nadk/Atp5mc1/Gucy2e/Ampd2/Gfus/Acly/Atp5me/Ndufb11/Vdac1/Pmm2/Ak8/Atp5mf/Pnp/Ndufb7/Nppc/Nadsyn1/Nans/Nme7/Ndufa11/Ndufb9/Trem2/Gfpt2/Sdhb/Acsl5/Nanp/Slc52a2/Afmid/Ndufc1/Atp5mg/Gucy2f/Upp2/Atp5f1e/Adcy10/Uap1l1/Uxs1/Gucy2g/Ndufs3/Mpc2/Ndufs7/mt-Nd4l/Ada/Prpsap2/Prps2/Rrm2b/…
GO:0002090	regulation of receptor internalization	-0.398719	-1.7582	0.000513906	0.0242811	Nedd4l/Ubqln2/Tspan7/Rnf216/Efnb2/Arrb1/Arc/App/Rnf220/Pip5k1c/Rspo1/Apln/Lrpap1/Gsg1l/Pard3/Akap5/Arf1/Ankrd13b/Aplnr/Tamalin/Cblb/Mib2/Wdr54/Tbc1d5/Ahi1/Nsf/Egf/Susd4/Hpca/Ptpn5/Lrrtm1/Dtnbp1/Flot1/Pcsk9/Dlg4/Drd2/Ncdn/Necab2/Syt17/Hap1
GO:0008277	regulation of G protein-coupled receptor signaling pathway	-0.334279	-1.59781	0.000527819	0.0247466	Grk3/Arrb1/Padi2/Trem2/Pde2a/Dnm2/App/Dnm1/Ghsr/Apln/Git1/Slit3/Gpsm1/Ada/Ulk4/Rgs9/Rgs11/Aplnr/Snca/Gprasp1/Robo1/Gnai2/Frmpd1/Pde4a/Gsk3a/Kctd16/Prkca/Mgll/Sstr4/Mrap2/Gpr27/Homer2/Phf24/Oprl1/Palm/Ptger3/Tub/Ramp1/Usp20/Ppp1r9b/Syp/Dtnbp1/Phb1/Camk2a/Rack1/Adrb1/Aplp1/Ramp3/Stmn1/Atp2b4/Drd2/Slc24a4/Rgs14/Rgs12/Necab2
GO:0140718	facultative heterochromatin formation	0.656414	1.94547	0.000572372	0.0249186	Phf2/Smarca5/Ezh2/Baz2a/Suz12/Ubtf/Jarid2/Eed/Sirt1/Ezh1/H1f2
GO:0030890	positive regulation of B cell proliferation	0.515902	1.90694	0.000558103	0.0249186	Ephb2/Bst1/Tfrc/Tlr4/Bcl6/Cd38/Btk/Vav3/Ptprc/Bmi1/Nckap1l/Atad5/Gpr183/Prlr/Ighm/Tnfrsf4
GO:0106070	regulation of adenylate cyclase-activating G protein-coupled receptor signaling pathway	-0.577004	-1.88773	0.000547944	0.0249186	Gnai2/Pde4a/Gsk3a/Sstr4/Mrap2/Oprl1/Ptger3/Rack1/Adrb1/Aplp1/Atp2b4
GO:0071867	response to monoamine	-0.44666	-1.80089	0.000547572	0.0249186	Drd3/Htr4/Htr2c/Gm527/Drd1/Alk/Gnao1/Drd5/Comt/Htt/Gna14/Gna11/Dnm2/App/Gnb5/Rgs9/Htr3a/Gnas/Ptger1/Htr2b/Atp1a3/Palm/Dtnbp1/Htr1a/Aplp1/Klf16/Chrna10/Htr6/Htr7/Drd2/Adcy5
GO:0045069	regulation of viral genome replication	0.441892	1.79772	0.000566841	0.0249186	Pkn2/Zc3hav1/Fam111a/Ddx5/Prox1/Ifitm3/Rsad2/Oasl1/Ddx3x/Eif2ak2/Oas2/Ifitm2/Setdb1/Ifih1/Oasl2/Top2b/Bst2/Ppih/Tmem39a/Ifitm7
GO:0050772	positive regulation of axonogenesis	-0.387802	-1.72926	0.000560606	0.0249186	Ndel1/Amigo1/Nin/Crabp2/Smurf1/Adcy10/Srf/Plxnb1/Golga2/Rnd2/Slitrk1/Map1b/Ntrk2/Arhgap32/Anapc2/Ilk/Limk1/Mapt/Shtn1/Apoe/Snap91/Robo1/Map2k1/Twf2/Map6/L1cam/Lpar3/Ctnnd2/Bcl11a/Stk25/Cdh4/Myo5b/Dcx/Dscam/Plxnc1/Islr2/Plxnd1/Tiam2/Dbn1
GO:0061013	regulation of mRNA catabolic process	0.334522	1.62129	0.000547206	0.0249186	Srsf1/Zc3hav1/Vim/Piwil2/Rock1/Rida/Pkp3/Tut4/Dhx36/Syncrip/Hnrnpu/Elavl4/Vegfa/Fam76b/Samd4/Pan3/Tent4a/Angel2/Rock2/Zfp36l1/Rbm38/Patl1/Qki/Rbm47/Mapkapk2/Paip1/Secisbp2/Rc3h2/Tbrg4/Dcp2/Senp1/Fus/Tut7/Dcp1b/Pan2/Npm1/Mapk9/Igf2bp3/Ago3/Thrap3/Ikbke/Meioc/Pcbp4/Larp4b/Ythdf3/Csde1/Ythdf2/Elavl1/Pnpt1/Fmr1/Cnot6l/Dhx9/Prr5l/Lrpprc/Cul4a/Magohb/E2f1/Fastkd2/Nbas/Arid5a/Rc3h1/Tardbp/Cnot1/Cirbp/Pa…
GO:0032944	regulation of mononuclear cell proliferation	0.320625	1.57956	0.000570188	0.0249186	Icosl/Ptpn22/Crtam/Tnfsf9/Ephb2/Il20rb/Lyn/Pde5a/Kitl/Itgal/Bst1/Tfrc/Tyrobp/Tgfbr2/Tlr4/Bcl6/Lgals3/Cd44/Cd38/Itch/Sos2/Slc4a1/Btk/Vav3/Ptprc/Nck1/Havcr2/Vcam1/Cd300a/Cd24a/Bmi1/Irgm1/Stat5b/Fcgr2b/Traf6/Nckap1l/Slc4a2/Atad5/Sos1/Cnn2/Cd46/Gpr183/Zbtb7b/Cd86/Prlr/Ighm/Cd59a/Il6st/Tnfrsf4/Ripk2/Tgfb1
GO:0007018	microtubule-based movement	-0.265002	-1.43565	0.000555903	0.0249186	Ift27/Cfap119/Arl3/Ribc2/Borcs6/Fez1/Rab11fip3/Vdac3/Meig1/Htt/Cfap90/Nme7/Efcab6/Pierce1/Ift22/Ndel1/Atg16l1/Spata33/Ssna1/Bloc1s5/Klc2/Tacr3/Taf7l/Ift57/App/Slc9b2/Kifc3/Ift88/Adcy10/Kif3b/Rsph4a/Efhc2/Odad4/Dnai4/Dnah14/Cimip2c/Map2/Dnai1/Saxo4/Bsn/Map1b/Ulk4/Zmynd10/AU040320/Catsperz/Ttll1/Efhb/Drc1/Fyco1/Kif4/Copg1/Sod1/Tubb4b/Cfap57/Cfap69/Rhot2/Ccdc40/Mapt/Wdr19/Dzip1/Nsun7/Bbs1/Ccdc103/Ap…
GO:0030900	forebrain development	-0.265359	-1.43435	0.00053937	0.0249186	Bcan/Casp3/Rac3/Smarca4/Nrgn/Srf/Ghrh/Ncam1/Sema3a/Filip1/Fyn/Ulk4/Tox/Htra2/Shh/Tbr1/Ntrk2/Ephb3/Eif2b5/Pomgnt1/Sec1/Trappc9/Tubb2b/Cfl1/Rapgef2/Slitrk5/Bmp2/Pax5/Isl1/Foxp2/Cdk5/Epha5/Bmp4/Lhx2/Fezf2/Foxg1/Bbs1/Tnr/Olig2/Kif26a/Kat2a/Robo1/Sema6b/Fezf1/Six3/Akr1c14/Atp1a3/Kif14/Rtn4rl2/Adgrg1/Nkx2-1/Kif1a/Otp/Wnt5a/Bcl11b/Dclk2/Ptger3/Cdk5r2/D130043K22Rik/Otx1/Phactr1/Numbl/Wnt7b/Cntnap2/Dcx/Dm…
GO:0042462	eye photoreceptor cell development	0.530779	1.90786	0.000585364	0.0253035	Olfm3/Rab37/Ccdc66/Pax6/Alms1/Mfrp/Hcn1/Cfh/Vegfa
GO:0010970	transport along microtubule	-0.326271	-1.61232	0.000590595	0.0253498	Ift27/Arl3/Borcs6/Fez1/Htt/Nme7/Ift22/Ndel1/Atg16l1/Ssna1/Bloc1s5/Klc2/Ift57/App/Ift88/Kif3b/Map2/Bsn/Map1b/Fyco1/Copg1/Sod1/Rhot2/Mapt/Wdr19/Bbs1/Ap3b2/Hsbp1/Map2k1/Dync2i1/Bloc1s3/Klc1/Map6/Kif17/Pex14/Klc3/Wasf1/Kif1a/Lca5/Flot2/Tub/Ift25/Dync2i2/Ift140/Tuba1a/Kif21b/Intu/Trim46/Agbl4/Dync1h1/Dync1i1/Dtnbp1/Bloc1s2/Map1a/Septin9/Uchl1/Dynll1/Cnih2/Caly/Ift122/Hap1
GO:0097061	dendritic spine organization	-0.371396	-1.69287	0.000602558	0.0256824	Arc/Trem2/Mapre3/App/Xlr4a/Abl2/Ephb1/Camk2b/Baiap2/Fyn/Cttn/Ephb3/Cfl1/Arf1/Prnp/Cdk5/Epha5/Marcks/Apoe/Cux2/Kalrn/Shank1/Mfn2/Ctnnd2/Kif1a/Myo5b/Itpka/Cntnap2/Dock10/Tanc2/Lzts3/Bhlhb9/Grin2b/Dtnbp1/Cdk5r1/Dlg4/Ngef/Dbn1/Sipa1l1/Arhgap33
GO:0019079	viral genome replication	0.391473	1.69987	0.00060962	0.0256907	Pkn2/Zc3hav1/Fam111a/Ddx5/Prox1/Ifitm3/Rsad2/Oasl1/Atg16l2/Atg5/Smc6/Ddx3x/Eif2ak2/Oas2/Ifitm2/Eif2ak4/Setdb1/Ifih1/Oasl2/Top2b/Bst2/Ppih/Tmem39a/Ifitm7
GO:0060079	excitatory postsynaptic potential	-0.361775	-1.66501	0.000611183	0.0256907	Sv2a/Chrnb3/Npff/Baiap2/Ntrk2/Chrna2/Htr3a/Glra2/Cdk5/Snca/Cux2/Trpv1/Igsf11/Shank1/Dgki/Prkar1b/Cacnb3/Cntnap2/Chrna4/Grin2b/Npy2r/Mpp2/Grip2/P2rx3/Dlg4/Begain/Slc17a7/Chrna10/Grik5/Slc8a2/Ptk2b/Stx1a/Adora2a/Dbn1/Sez6
GO:0060041	retina development in camera-type eye	0.327195	1.58971	0.000617702	0.025787	Calb1/Atoh7/Sox9/Neurod1/Tfap2b/Prom1/Lhx1/Chd7/Megf11/Nfia/Tgfb2/Pax2/Ccdc66/Pax6/Rs1/Slc4a5/Prox1/Alms1/Mfrp/Hcn1/Cdon/Barhl2/Hif1a/Nfib/Cfh/Ttll5/Hipk1
GO:0098712	L-glutamate import across plasma membrane	0.651596	1.91351	0.00063378	0.0258586	Slc1a3/Slc1a6/Per2/Grm1/Itgb1
GO:0045576	mast cell activation	0.438092	1.77982	0.000630845	0.0258586	Cnr1/Lyn/Fcgr3/Kit/Lilrb4a/Crhr1/Milr1/Tlr4/Ptgdr/Stxbp2/Ptpre/Btk/Cd300a/Pdpk1/Vamp8/Lat/Unc13d/Cd48/Snap23/Cd300lf/Lcp2/Cd84/Nr4a3/Pla2g3/Hmox1/Plscr2/Gata2/Foxf1/Enpp3/Fcer1g
GO:0072089	stem cell proliferation	0.355059	1.65851	0.000636388	0.0258586	Sox9/Hmgb2/Kitl/Ptch1/Tgfbr2/Nfib/Hnrnpu/Vegfa/Ptprc/N4bp2l2/Wnt3/Prl2c3/Eif2ak2/Sox17/Tgfbr1/Prg4/Six2/Zfp36l1/Irgm1/Fermt1/Hoxb4/Foxm1/Hoxa3/Cd109/Prrx1/Fgfr1/Fubp1/Fgf9/Tial1/Thpo/Nes/Nfya/Tgfb1/Pim1/Cebpa/Nf1/Fermt2/Ago3/Wnt10b/Scrg1/Abcb1a/Ythdf2/Rnf43/Etv6/Fgf2/Pax3/Dgcr8/Vegfc/Shox2/Cdkn2c
GO:0002699	positive regulation of immune effector process	0.313066	1.56152	0.000625503	0.0258586	Ptpn22/Crtam/Appl2/Ephb2/Rif1/Fcgr3/Kit/Tlr3/Lbp/Lilrb4a/Tlr7/H2-D1/Itgb2/Crhr1/Tfrc/Malt1/Rsad2/Kmt5b/Tyrobp/Dhx36/Tlr4/Pagr1a/Pms2/Stxbp2/B2m/Btk/Ptprc/Sema7a/Nsd2/Cd300a/Tlr2/Cd24a/Stat5b/Dhx58/Nlrp3/Traf6/Mapkapk2/Atad5/Vamp8/Rigi/Cd46/Irf5/Cd86/Shld3/Fcgr1/Casp4/Tnfrsf4/Ripk2/Tgfb1/Shld1/Spi1/Il13ra1/Msh2/Ufl1/Il1r1/Nod1/Ep300/H2-T23/Il2rg/Brd2
GO:0050670	regulation of lymphocyte proliferation	0.320491	1.57638	0.000648613	0.026057	Icosl/Ptpn22/Crtam/Tnfsf9/Ephb2/Il20rb/Lyn/Pde5a/Kitl/Itgal/Bst1/Tfrc/Tyrobp/Tgfbr2/Tlr4/Bcl6/Lgals3/Cd44/Cd38/Itch/Sos2/Slc4a1/Btk/Vav3/Ptprc/Nck1/Havcr2/Vcam1/Cd300a/Cd24a/Bmi1/Irgm1/Stat5b/Fcgr2b/Traf6/Nckap1l/Slc4a2/Atad5/Sos1/Cd46/Gpr183/Zbtb7b/Cd86/Prlr/Ighm/Cd59a/Il6st/Tnfrsf4/Ripk2/Tgfb1
GO:0042098	T cell proliferation	0.316914	1.55175	0.000649821	0.026057	Icosl/Ptpn22/Crtam/Tnfsf9/Il20rb/Pde5a/Msn/Kitl/Itgal/Lilrb4a/Itgb2/Tfrc/Malt1/Tgfbr2/Bcl6/Lgals3/Cd44/Itch/Sos2/Slc4a1/Ptprc/Nck1/Havcr2/Vcam1/Cd24a/Bmi1/Irgm1/Stat5b/Traf6/Nckap1l/Slc4a2/Cd70/Sos1/Cd46/Rc3h2/Zbtb7b/Lmbr1l/Cd86/Ncstn/Cd59a/Il6st/Tnfrsf4/Ripk2/Tgfb1/Ccnd3/Hmgb1/Dock8/Slfn2/Lgals9/Cd151/Marchf7/Cd274/Hes1/Dnaja3
GO:0010948	negative regulation of cell cycle process	0.298799	1.52309	0.000667842	0.0266046	Topbp1/Lyn/Cry1/Uimc1/Kank2/Klf4/Mbtps2/Fam107a/Kat2b/Prox1/Cdc14b/Nek2/Mbd4/Smarca5/Dot1l/Foxn3/Ccnf/Donson/Cacnb4/Rb1/Zw10/Chek1/Chfr/Wapl/Parp9/Chmp4c/Ezh2/Gtpbp4/Cdk5rap2/Mdc1/Trim39/Nme6/Brd7/Zfp36l1/Nbn/Eif2ak4/Mre11a/Zwilch/Mad2l1/Prpf4b/Dact1/Taok1/Ctdsp2/Tpra1/Clock/Creb3l1/Rad51/Apbb2/Recql4/Hus1/Prkdc/Nae1/Atrx/Npm1/Rbm14/Gas1/Dtx3l/Rnf168/Cep192/Msh2/Atr/Ufl1/Wac/Brcc3/Spc24/Nubp1/Bub…
GO:0099111	microtubule-based transport	-0.307883	-1.56221	0.000674865	0.0267098	Ift27/Arl3/Borcs6/Fez1/Htt/Nme7/Ift22/Ndel1/Atg16l1/Ssna1/Bloc1s5/Klc2/Ift57/App/Ift88/Adcy10/Kif3b/Rsph4a/Odad4/Map2/Dnai1/Bsn/Map1b/Ulk4/Ttll1/Drc1/Fyco1/Copg1/Sod1/Rhot2/Ccdc40/Mapt/Wdr19/Bbs1/Ccdc103/Ap3b2/Hsbp1/Invs/Spag6/Map2k1/Dync2i1/Bloc1s3/Klc1/Map6/Kif17/Pex14/Klc3/Wasf1/Kif1a/Odad3/Lca5/Flot2/Tub/Ift25/Dync2i2/Rsph9/Ift140/Tuba1a/Kif21b/Intu/Trim46/Agbl4/Dync1h1/Dync1i1/Dtnbp1/Bloc1s2…
GO:0019320	hexose catabolic process	-0.492272	-1.89345	0.000684696	0.026924	Tpi1/Gck/Adcy10/Glb1l/Glyctk/Eno2/Galt/Mpi/Pgam2/Pkm/Aldoa/Ldha/Gale/Aldob/Gpi1/Hk1/Gapdh/Bad/Hsd17b14/Eno1/Aldh1a7/Pfkl/Src/Pfkp/Galk1
GO:0099072	regulation of postsynaptic membrane neurotransmitter receptor levels	-0.325871	-1.60341	0.000699241	0.0271457	Rnf220/Pip5k1c/Ghsr/Syt3/Git1/Camk2g/Agap3/Epb41l1/Agrn/Grip1/Gsg1l/Tmub1/Grid1/Akap5/Ap2a1/Tamalin/Vamp2/Ap2s1/Cblb/Mib2/Kalrn/Dlg3/Map2k1/Ap2b1/Igsf11/Gpc4/Iqsec2/Nptx2/Ctnnd2/Lrrc7/Cpt1c/Susd4/Flot2/Musk/Snap47/Cntnap2/Hpca/Kif21b/Sst/Cnih3/C1ql2/Dok7/Hras/Camk2a/Vwc2/Nptxr/Grip2/Dlg4/Olfm2/Nsg2/Caly/Cacng8/Ncdn/Cacng3/Syt17/Hap1
GO:0019221	cytokine-mediated signaling pathway	0.272506	1.45394	0.000698937	0.0271457	Appl2/Il16/Srsf1/Il20rb/Cxcl10/Lyn/Kit/Il17re/St18/Csf2rb/Naip5/Flt3/Stat2/Ifitm3/Il3ra/Oasl1/Tut4/Hif1a/Naip6/Parp14/Rps6ka5/Cd44/Hipk1/Itch/Foxo3/Ptprc/Eda2r/Parp9/Stat1/Krt8/Cd24a/Il15ra/Ackr4/Irgm1/Stat5b/Oas2/Ifitm2/Sh2b3/Nlrc5/Nlrp3/Traf6/Rbm47/Il6ra/Ifih1/Ccl3/Fzd4/Cd70/Irf5/Xiap/Ptpn2/Ifnar1/Oasl2/Il1r2/Nfkb1/Ackr1/Irak1/Ccr5/Ext1/Thpo/Prlr/Csf3r/Gpr108/Casp4/Nsmaf/Spata2/Il6st/Cav1/Tnfrs…
GO:0071625	vocalization behavior	-0.607236	-1.93982	0.000710944	0.0274253	Slitrk1/Auts2/Nrxn2/Foxp2/Shank1/Ntsr1/Cntnap2/Htr1a/Dlg4/Celf6
GO:1903900	regulation of viral life cycle	0.386426	1.69838	0.000726878	0.0276984	Pkn2/Zc3hav1/Fam111a/Trim62/Ddx5/Prox1/Ifitm3/Ark2n/Rsad2/Oasl1/Trim12c/Ddx3x/Trim30d/Eif2ak2/Oas2/Ifitm2/Setdb1/Furin/Ifih1/Oasl2/Trim30a/Top2b/Bst2/Ppih/Tmem39a/Hmgb1/Ifitm7
GO:0032496	response to lipopolysaccharide	0.286592	1.47729	0.000727986	0.0276984	Slc22a4/Ptpn22/Ephb2/Cnr1/Cxcl10/Lyn/Hmgb2/Tfap2a/Lbp/Nfkb2/Vim/Cdk19/Adam9/Pxn/Lilrb4a/Gbp3/Cd68/Malt1/Ldoc1/Tut4/Ncl/Trim12c/Tlr4/B2m/Slc12a2/Lcn2/Btk/Trim30d/Havcr2/Gbp6/Stat1/Abca1/Eif2ak2/Abcc8/Nos3/Irgm1/Stat5b/Rps6ka3/Ppbp/Nlrp3/Traf6/Mapkapk2/Prdx3/Cps1/Xiap/Ifnar1/Fcgr4/Dusp10/Cd86/Nfkb1/Akap8/Trim30a/Irak1/Ccr5/Nr1h3/Casp4/Cxcl16/Ncf2/Ripk2/Hmgb1/Ticam2/Spi1/Hadhb/Akap12/Adam17/Star/Lga…
GO:0021537	telencephalon development	-0.283495	-1.47452	0.000731656	0.0276984	Alk/Pfdn1/Npy/Inhba/Slc32a1/Pou3f3/Cxcr4/Pofut3/Fez1/Atat1/Lhx6/Rtn4r/Slc8a3/Htt/Mdk/Gria1/Fat4/Zswim6/Htr5a/Ndel1/Atg16l1/Nr2e1/Zdhhc16/Nin/Lef1/Large1/Atf5/Ift88/Bcan/Casp3/Nrgn/Srf/Sema3a/Filip1/Ulk4/Shh/Tbr1/Ntrk2/Ephb3/Eif2b5/Pomgnt1/Sec1/Trappc9/Tubb2b/Cfl1/Slitrk5/Bmp2/Pax5/Foxp2/Cdk5/Epha5/Bmp4/Lhx2/Fezf2/Foxg1/Bbs1/Tnr/Kif26a/Kat2a/Robo1/Sema6b/Fezf1/Six3/Akr1c14/Atp1a3/Kif14/Rtn4rl2/Adg…
GO:0050864	regulation of B cell activation	0.357536	1.64868	0.000736402	0.027706	Ephb2/Rif1/Lyn/Flt3/Lilrb4a/Bst1/Tfrc/Kmt5b/Tyrobp/Tlr4/Pagr1a/Pms2/Bcl6/Cd38/Btk/Vav3/Ptprc/Nsd2/Cd300a/Cd24a/Bmi1/Zfp36l1/Stat5b/Fcgr2b/Pcid2/Nckap1l/Atad5/Gpr183/Shld3/Atp11c/Prlr/Ighm/Tnfrsf4/Tgfb1/Shld1/Spi1/Msh2/Il2rg/Parp3/Id2/Cdkn1a
GO:1900225	regulation of NLRP3 inflammasome complex assembly	0.472613	1.82468	0.000773355	0.0280314	Ptpn22/Lats1/Tlr4/Btk/Ddx3x/Stmp1/Eif2ak2/Dhx33/Irgm1/Zdhhc5/Nlrp3/Lamp2/Trim30a/Lats2/Casp4/Brcc3/Gbp5/Usp50
GO:0030888	regulation of B cell proliferation	0.451766	1.79587	0.000776709	0.0280314	Ephb2/Lyn/Bst1/Tfrc/Tyrobp/Tlr4/Bcl6/Cd38/Btk/Vav3/Ptprc/Cd300a/Cd24a/Bmi1/Fcgr2b/Nckap1l/Atad5/Gpr183/Prlr/Ighm/Tnfrsf4
GO:0050432	catecholamine secretion	-0.422627	-1.77077	0.000761825	0.0280314	Chrna6/Chrna7/Adora2b/Chga/Adora3/Cadps/Drd3/Rab3a/Pink1/Syt11/Syt1/Xlr4b/Agtr2/Comt/Kcnb1/Gck/Ghsr/Xlr4a/Adra2a/Grm2/Oprk1/Snca/Nisch/Gabbr1/Hc/Oxt/Ptger3/Vip/Cartpt/Adra2c/Chrna4/Dtnbp1/Oxtr/Npy2r/Htr6/Stx1a/Hrh3/Drd2/Adora2a
GO:0032640	tumor necrosis factor production	0.334441	1.60955	0.000764616	0.0280314	Ptpn22/Ephb2/Fcgr3/Tlr3/Lbp/Flt3/Tyrobp/Ncl/Tlr4/Cybb/Btk/Ptprc/Havcr2/Tlr2/Abcc8/Cd24a/Errfi1/Oas2/Fcgr2b/Cyp2j6/Mapkapk2/Ube2j1/Ifih1/Ccl3/Cd47/Rigi/Akap8/Trim30a/Ccr5/Fcgr1/Ripk2/Tgfb1/Clec4a2/Tmem106a/Hmgb1/Akap12/Adam17/Arhgef2/Lgals9/Nod1/Angpt1/C5ar2/Selenos/Ripk1/Dhx9/Sirt1/Sash3/Cd84/Zbtb20/Rad21/Clec4a1/Arid5a/Hdac2/Twist1/Ptafr/Plcg2/Lrrk2/Il1a/Nrdc/Siglech/Fcer1g
GO:0032680	regulation of tumor necrosis factor production	0.334441	1.60955	0.000764616	0.0280314	Ptpn22/Ephb2/Fcgr3/Tlr3/Lbp/Flt3/Tyrobp/Ncl/Tlr4/Cybb/Btk/Ptprc/Havcr2/Tlr2/Abcc8/Cd24a/Errfi1/Oas2/Fcgr2b/Cyp2j6/Mapkapk2/Ube2j1/Ifih1/Ccl3/Cd47/Rigi/Akap8/Trim30a/Ccr5/Fcgr1/Ripk2/Tgfb1/Clec4a2/Tmem106a/Hmgb1/Akap12/Adam17/Arhgef2/Lgals9/Nod1/Angpt1/C5ar2/Selenos/Ripk1/Dhx9/Sirt1/Sash3/Cd84/Zbtb20/Rad21/Clec4a1/Arid5a/Hdac2/Twist1/Ptafr/Plcg2/Lrrk2/Il1a/Nrdc/Siglech/Fcer1g
GO:0071706	tumor necrosis factor superfamily cytokine production	0.332783	1.60523	0.000781845	0.0280314	Ptpn22/Ephb2/Fcgr3/Tlr3/Lbp/Flt3/Tyrobp/Ncl/Tlr4/Cybb/Btk/Ptprc/Havcr2/Tlr2/Abcc8/Cd24a/Errfi1/Oas2/Fcgr2b/Cyp2j6/Mapkapk2/Ube2j1/Ifih1/Ccl3/Cd47/Rigi/Akap8/Trim30a/Ccr5/Fcgr1/Ripk2/Tgfb1/Clec4a2/Tmem106a/Hmgb1/Akap12/Adam17/Arhgef2/Lgals9/Nod1/Angpt1/C5ar2/Selenos/Ripk1/Cd274/Dhx9/Sirt1/Sash3/Cd84/Zbtb20/Rad21/Clec4a1/Arid5a/Hdac2/Twist1/Ptafr/Plcg2/Lrrk2/Il1a/Nrdc/Siglech/Fcer1g
GO:1903555	regulation of tumor necrosis factor superfamily cytokine production	0.332783	1.60523	0.000781845	0.0280314	Ptpn22/Ephb2/Fcgr3/Tlr3/Lbp/Flt3/Tyrobp/Ncl/Tlr4/Cybb/Btk/Ptprc/Havcr2/Tlr2/Abcc8/Cd24a/Errfi1/Oas2/Fcgr2b/Cyp2j6/Mapkapk2/Ube2j1/Ifih1/Ccl3/Cd47/Rigi/Akap8/Trim30a/Ccr5/Fcgr1/Ripk2/Tgfb1/Clec4a2/Tmem106a/Hmgb1/Akap12/Adam17/Arhgef2/Lgals9/Nod1/Angpt1/C5ar2/Selenos/Ripk1/Cd274/Dhx9/Sirt1/Sash3/Cd84/Zbtb20/Rad21/Clec4a1/Arid5a/Hdac2/Twist1/Ptafr/Plcg2/Lrrk2/Il1a/Nrdc/Siglech/Fcer1g
GO:0050900	leukocyte migration	0.28383	1.47797	0.000758865	0.0280314	Ptpn22/Crtam/Il16/Cxcl10/Lyn/Fcgr3/Kit/Trpv4/Pdgfd/Msn/Mtus1/Kitl/Tgfb2/Lbp/Icam1/Itgal/Rock1/Itgb2/Mmp2/Bst1/Pecam1/B4galt1/Nedd9/Fut9/Lgals3/Itgb1/Vegfa/Cd9/Itga6/Slc12a2/Vav3/Dbh/C3ar1/Myo1g/Pla2g7/Arhgef5/Golph3/Vcam1/Itga7/Itga4/Cd300a/Tlr2/Cd24a/Fpr2/Dnm1l/Eps8/Stat5b/Flt1/Madcam1/Itga3/Ppbp/Gpsm3/Stk10/Myo1f/Trpm2/Nckap1l/Mmp9/Ccl3/Cd47/Cnn2/Gpr183/Apod/Lrch1/Ext1/AI182371/Jaml/P2rx4/Csf3r…
GO:1901532	regulation of hematopoietic progenitor cell differentiation	0.508744	1.88048	0.000786614	0.0280375	Kitl/Dhx36/Vegfa/Sos2/N4bp2l2/Nfe2l2/Flcn/Eif2ak2/Flt1/Pcid2/Sos1/Prkdc/Hmgb1/Spi1/Ythdf2/Hes1/Fnip1/Zbtb1/Hspa9/Dpf2/Fas/Gata2/Kdr/Foxc1
GO:0046365	monosaccharide catabolic process	-0.479219	-1.8811	0.000798024	0.028248	Tpi1/Gck/Adcy10/Glb1l/Glyctk/Eno2/Galt/Mpi/Pgam2/Pkm/Aldoa/Ldha/Gale/Aldob/Gpi1/Hk1/Gapdh/Bad/Hsd17b14/Eno1/Aldh1a7/Pfkl/Src/Pfkp/Galk1
GO:0032943	mononuclear cell proliferation	0.294932	1.50989	0.00080179	0.028248	Icosl/Ptpn22/Crtam/Tnfsf9/Ephb2/Il20rb/Lyn/Pde5a/Msn/Kitl/Itgal/Flt3/Lilrb4a/Itgb2/Bst1/Tfrc/Malt1/Tyrobp/Tgfbr2/Tlr4/Bcl6/Lgals3/Cd44/Cd38/Itch/Sos2/Slc4a1/Btk/Vav3/Ptprc/Kctd9/Nck1/Havcr2/Vcam1/Cd300a/Cd24a/Bmi1/Irgm1/Stat5b/Fcgr2b/Traf6/Pura/Nckap1l/Slc4a2/Atad5/Cd70/Sos1/Cnn2/Cd46/Gpr183/Rc3h2/Zbtb7b/Lmbr1l/Cd86/Ncstn/Prlr/Ighm/Cd59a/Il6st/Tnfrsf4/Ripk2/Tgfb1
GO:1900227	positive regulation of NLRP3 inflammasome complex assembly	0.534566	1.88386	0.000835519	0.0289346	Ptpn22/Lats1/Tlr4/Btk/Ddx3x/Stmp1/Dhx33/Zdhhc5/Nlrp3/Lats2/Casp4/Brcc3/Gbp5/Usp50
GO:1903350	response to dopamine	-0.464858	-1.80445	0.000833169	0.0289346	Oprm1/Drd3/Htr4/Htr2c/Gm527/Drd1/Alk/Gnao1/Drd5/Comt/Htt/Gna14/Gna11/Dnm2/Gnb5/Rgs9/Htr3a/Gnas/Ptger1/Htr2b/Palm/Dtnbp1/Htr1a/Klf16/Chrna10/Htr6/Htr7/Drd2/Adcy5
GO:0043487	regulation of RNA stability	0.325633	1.58304	0.000830533	0.0289346	Srsf1/Vim/Piwil2/Rock1/Rida/Tut4/Dhx36/Syncrip/Hnrnpu/Elavl4/Vegfa/Fam76b/Dkc1/Samd4/Pan3/Tent4a/Angel2/Rock2/Zfp36l1/Rbm38/Patl1/Qki/Rbm47/Mapkapk2/Paip1/Secisbp2/Rc3h2/Tbrg4/Naf1/Dcp2/Senp1/Fus/Tut7/Dcp1b/Pan2/Npm1/Mapk9/Igf2bp3/Plxnb2/Ago3/Thrap3/Ikbke/Meioc/Slfn2/Pcbp4/Larp4b/Ythdf3/Csde1/Rnh1/Ythdf2/Elavl1/Pnpt1/Fmr1/Cnot6l/Dhx9/Cul4a/E2f1/Fastkd2/Arid5a/Rc3h1/Zc3h18/Tardbp/Cnot1/Dxo/Cirbp/P…
GO:0002237	response to molecule of bacterial origin	0.283521	1.47675	0.000840272	0.0289348	Slc22a4/Ptpn22/Ephb2/Cnr1/Cxcl10/Lyn/Hmgb2/Tfap2a/Lbp/Nfkb2/Vim/Cdk19/Adam9/Pxn/Lilrb4a/Gbp3/Cd68/Malt1/Ldoc1/Tut4/Ncl/Trim12c/Tlr4/B2m/Slc12a2/Lcn2/Btk/Trim30d/Havcr2/Gbp6/Stat1/Abca1/Eif2ak2/Tlr2/Abcc8/Cd24a/Nos3/Irgm1/Stat5b/Fcgr2b/Rps6ka3/Ppbp/Nlrp3/Traf6/Mapkapk2/Prdx3/Cps1/Irf5/Xiap/Ifnar1/Fcgr4/Dusp10/Cd86/Nfkb1/Akap8/Trim30a/Irak1/Ccr5/Nr1h3/Casp4/Cxcl16/Ncf2/Ripk2/Hmgb1/Ticam2/Spi1/Hadhb…
GO:0009954	proximal/distal pattern formation	-0.558064	-1.85378	0.000845244	0.0289425	Apc/Six3/Pbx1/Dll1/Lrp4/Dlx1/Osr1/Sp8/Dlx2
GO:0021545	cranial nerve development	0.44285	1.74994	0.000850371	0.0289554	Atoh7/Ephb2/Hes3/Chd7/Slc1a3/Tfap2a/Pax2/Phox2b/Six4/Kcna2/Tmem126a/Drgx/Cited2
GO:0014848	urinary tract smooth muscle contraction	-0.716639	-1.98209	0.000872335	0.0295382	Pla2g6/Trpv1/Tacr1/Ptger3/Cacna1c/P2rx3/Atp2b4/Htr7
GO:0098884	postsynaptic neurotransmitter receptor internalization	-0.440751	-1.76084	0.000898041	0.0300745	Drd3/Ap2a2/Nedd4l/Tspan7/Rnf216/Efnb2/Arc/Rnf220/Pip5k1c/Gsg1l/Tmub1/Akap5/Ap2a1/Tamalin/Ap2s1/Cblb/Mib2/Ap2b1/Susd4/Hpca/Caly/Ncdn/Syt17/Hap1
GO:0099590	neurotransmitter receptor internalization	-0.440751	-1.76084	0.000898041	0.0300745	Drd3/Ap2a2/Nedd4l/Tspan7/Rnf216/Efnb2/Arc/Rnf220/Pip5k1c/Gsg1l/Tmub1/Akap5/Ap2a1/Tamalin/Ap2s1/Cblb/Mib2/Ap2b1/Susd4/Hpca/Caly/Ncdn/Syt17/Hap1
GO:0061157	mRNA destabilization	0.388106	1.70675	0.000923716	0.0307653	Piwil2/Rock1/Rida/Tut4/Dhx36/Syncrip/Hnrnpu/Samd4/Pan3/Tent4a/Rock2/Zfp36l1/Patl1/Qki/Paip1/Rc3h2/Dcp2/Senp1/Tut7/Dcp1b/Pan2/Mapk9/Ago3/Ythdf3/Csde1/Ythdf2/Elavl1/Pnpt1/Fmr1/Cnot6l/Dhx9/Cul4a/Rc3h1/Tardbp/Cnot1/Pabpc1/Tnrc6a/Hnrnpd/Cnot7/Fxr1/Cnot6/Tnrc6b/Alkbh5/Celf1/Cnot2
GO:0099562	maintenance of postsynaptic density structure	-0.74104	-1.95103	0.000957724	0.0309022	Csmd2/Prickle2/Shank1/Psd/Prickle1/Mpp2
GO:0048243	norepinephrine secretion	-0.586794	-1.90377	0.000955059	0.0309022	Chrna7/Adora2b/Adora3/Agtr2/Comt/Kcnb1/Ghsr/Adra2a/Nisch/Hc/Oxt/Ptger3/Adra2c/Oxtr/Stx1a/Hrh3/Adora2a
GO:0050779	RNA destabilization	0.375868	1.65849	0.000958247	0.0309022	Piwil2/Rock1/Rida/Tut4/Dhx36/Syncrip/Hnrnpu/Samd4/Pan3/Tent4a/Rock2/Zfp36l1/Patl1/Qki/Paip1/Rc3h2/Dcp2/Senp1/Tut7/Dcp1b/Pan2/Mapk9/Ago3/Ythdf3/Csde1/Ythdf2/Elavl1/Pnpt1/Fmr1/Cnot6l/Dhx9/Cul4a/Rc3h1/Zc3h18/Tardbp/Cnot1/Dxo/Pabpc1/Tnrc6a/Hnrnpd/Cnot7/Fxr1/Cnot6/Tnrc6b/Alkbh5/Celf1/Cnot2
GO:1990823	response to leukemia inhibitory factor	0.349864	1.61458	0.000958247	0.0309022	Rif1/Shmt1/Ctbp2/Klf4/Gclm/Icam1/Pax6/Tfrc/Smarca5/Ncl/Pcolce/Hnrnpu/Cacnb4/Adam23/Otx2/Mynn/Bclaf1/Ubxn2a/Gnpnat1/Sox17/Sycp3/Eps8/Creb1/Hk2/Fzd4/Mir374b/Nol8/Rnmt/Sdad1/Ext1/Ubtf/Spry4/Jarid2/Pml/Abcd4/Polr1f/Gtf2h1/Eed/Mat2a/Sirt1/Ildr1/Lrrc2/Mkrn1/Vegfc/Trim2/Kdm3a
GO:0002703	regulation of leukocyte mediated immunity	0.31832	1.57181	0.000935695	0.0309022	Crtam/Rif1/Il20rb/Lyn/Fcgr3/Kit/Tlr3/H2-D1/Itgb2/Crhr1/Tfrc/Malt1/Rsad2/Kmt5b/Tyrobp/Dhx36/Tlr4/Pagr1a/Pms2/Bcl6/Stxbp2/B2m/Btk/Ptprc/Was/Nsd2/Havcr2/Cd300a/Tlr2/Cd24a/Pdpk1/Nectin4/Stat5b/Fcgr2b/Nlrp3/Traf6/Nckap1l/Atad5/Vamp8/Rigi/Cd46/Unc13d/Hfe/Shld3/Fcgr1/Tgfb1/Bst2/Clec2d/Hmgb1/Shld1/Spi1/Msh2/Ufl1/Il1r1/Lgals9/H2-T23/Cd274/Parp3/Foxj1/Dnase1/Sash3/Zbtb1/Cd84/C3
GO:0051017	actin filament bundle assembly	-0.320496	-1.57032	0.000945556	0.0309022	Cfl1/Carmil1/Spire2/Limk1/Marcks/Ppm1e/Clasp1/Aif1/Rgcc/Fhod3/Shank1/Espn/Pdxp/Tacr1/Actg1/Arhgap28/Frmd7/Synpo2/Rab40b/Evl/Arhgap6/Fscn2/Myoc/Rapgef3/Phactr1/Add2/Pcdh15/Add1/Mtor/S100a10/Kank3/Src/Nox4/Baiap2l2/Synpo/Stmn1/Dmtn/Cx3cl1/Kctd13/Fscn1/Ptk2b/Tac1/Dbn1/Dpysl3
GO:0001963	synaptic transmission, dopaminergic	-0.525879	-1.85551	0.000967149	0.0310251	Drd3/Pink1/Drd1/Pnkd/Aph1c/Drd5/Comt/Tor1a/Cdk5/Snca/Nat8l/Rasd2/Gdnf/Th/Flot1/Crhbp/Rab3b/Drd2/Adora2a
GO:0097028	dendritic cell differentiation	0.526368	1.91089	0.000976639	0.0311655	Camk4/Tnfsf9/Zbtb46/Lyn/Flt3/Tgfbr2/Traf6/Trpm2/Tgfb1/Itgb8/Hmgb1/Spi1/Irf8/Irf9/Prtn3/Flt3l/Pirb/Slamf9
GO:0070663	regulation of leukocyte proliferation	0.305897	1.52567	0.000985355	0.0312799	Icosl/Ptpn22/Crtam/Tnfsf9/Ephb2/Il20rb/Lyn/Pde5a/Kit/Csf2rb/Kitl/Itgal/Bst1/Tfrc/Tyrobp/Tgfbr2/Tlr4/Bcl6/Lgals3/Cd44/Cd38/Itch/Sos2/Slc4a1/Btk/Vav3/Ptprc/Nck1/Havcr2/Vcam1/Cd300a/Cd24a/Bmi1/Irgm1/Stat5b/Fcgr2b/Traf6/Hhex/Nckap1l/Slc4a2/Atad5/Sos1/Cnn2/Cd46/Gpr183/Zbtb7b/Cd86/Prlr/Ighm/Cd59a/Il6st/Tnfrsf4/Ripk2/Tgfb1
GO:0044546	NLRP3 inflammasome complex assembly	0.463111	1.81223	0.000992331	0.0313381	Ptpn22/Lats1/Tlr4/Btk/Ddx3x/Stmp1/Eif2ak2/Dhx33/Irgm1/Zdhhc5/Nlrp3/Lamp2/Trim30a/Lats2/Casp4/Ufl1/Brcc3/Gbp5/Usp50
GO:1904321	response to forskolin	-0.596148	-1.92169	0.00100511	0.0313387	Hdac8/Epha5/Adcy8/Akr1c18/Slc5a5/Adcy3/Jun/Ptger3/Adcy2/Hrh3/Adcy5
GO:0021533	cell differentiation in hindbrain	0.559558	1.91017	0.00100778	0.0313387	Rora/Grid2/Lhx1/Ttc21b/Cbln1/Phox2b/Skor2/Prox1/Lhx5/Wnt7a/Atp7a/Cacna1a/Ophn1/Atxn2/Nfix/Kndc1/Ulk1/Gata2/Atp2b2
GO:0060997	dendritic spine morphogenesis	-0.393625	-1.69605	0.000998601	0.0313387	Ephb1/Camk2b/Baiap2/Ephb3/Cfl1/Cdk5/Epha5/Marcks/Cux2/Kalrn/Shank1/Mfn2/Ctnnd2/Kif1a/Myo5b/Itpka/Dock10/Tanc2/Lzts3/Bhlhb9/Dtnbp1/Cdk5r1/Dlg4/Ngef/Dbn1/Sipa1l1/Arhgap33
GO:0140239	postsynaptic endocytosis	-0.446472	-1.79133	0.00101974	0.0315497	Drd3/Ap2a2/Nedd4l/Tspan7/Rnf216/Efnb2/Arc/Dnm2/Rnf220/Pip5k1c/Gsg1l/Tmub1/Akap5/Ap2a1/Tamalin/Ap2s1/Cblb/Mib2/Ap2b1/Susd4/Hpca/Caly/Ncdn/Syt17/Hap1
GO:0007193	adenylate cyclase-inhibiting G protein-coupled receptor signaling pathway	-0.397546	-1.72424	0.00105031	0.0323314	Grm7/Htr5a/Pde2a/Htr5b/App/Apln/Ednra/Adra2a/Grm2/Oprk1/Chrm4/Chrm3/Akap5/Chrm2/Aplnr/Gnai2/Htr1d/Grik3/Gabbr1/Oprl1/Chlsn/Palm/S1pr3/Sstr5/Adra2c/Gnaz/Chrm1/Htr1a/Npy2r/Rab26/Hrh3/Drd2/Adcy5
GO:0007189	adenylate cyclase-activating G protein-coupled receptor signaling pathway	-0.335564	-1.59078	0.00106167	0.0325085	Gpr101/Adcy8/Ptgfr/Gnas/Ptger1/Mrgpre/Glp1r/Gnai2/Adcy3/Pde4a/Gsk3a/Sstr4/Mrap2/Lpar3/Oprl1/Prkar1b/Ptger3/Vip/S1pr3/Ramp1/Mc4r/Adra1a/Prkar2b/Rack1/Adrb1/Aplp1/Ramp3/Gpr6/Adcy2/Adcyap1r1/Htr6/Atp2b4/Adra1b/Htr7/Adora2a/Adcy5
GO:0030534	adult behavior	-0.31384	-1.55284	0.00106673	0.0325085	App/Ghsr/Fgfbp3/Abl2/Gbx1/Grm2/Oprk1/Slitrk1/Ulk4/Htra2/Nrxn2/Fosb/Septin5/Slitrk5/Klhl1/Rnf180/Pax5/Cdk5/Sdk1/Snca/Mapt/Bbs1/Agrp/Crebbp/Kalrn/Pum1/Fkrp/Ppp1r1b/Shank1/Ntsr1/Slitrk6/Atp1a3/Efnb3/Homer2/Oprl1/Cntnap2/Pbx3/Cartpt/Atg7/Tuba1a/Sez6l/Pcdh15/Chrna4/Cacna1c/Ppara/Ehmt2/Htr1a/Pcdh17/Uchl1/Crhbp/Adra1b/Drd2/Tpgs1/Trh/Sez6
GO:0106027	neuron projection organization	-0.352862	-1.63312	0.00108724	0.0329688	Arc/Trem2/Mapre3/App/Xlr4a/Dctn1/Abl2/Adcy10/Ephb1/Camk2b/Baiap2/Fyn/Cttn/Ephb3/Cfl1/Arf1/Prnp/Cdk5/Epha5/Marcks/Apoe/Cux2/Kalrn/Shank1/Atp1a3/Mfn2/Ctnnd2/Kif1a/Myo5b/Itpka/Cntnap2/Dock10/Tanc2/Lzts3/Bhlhb9/Grin2b/Dtnbp1/Map1a/Cdk5r1/Dlg4/Ngef/Dbn1/Sipa1l1/Arhgap33
GO:0014832	urinary bladder smooth muscle contraction	-0.754853	-1.95791	0.00114368	0.0337435	Pla2g6/Trpv1/Tacr1/Ptger3/Cacna1c/P2rx3/Atp2b4/Htr7
GO:0050871	positive regulation of B cell activation	0.401125	1.69836	0.00113938	0.0337435	Ephb2/Rif1/Bst1/Tfrc/Kmt5b/Tlr4/Pagr1a/Pms2/Bcl6/Cd38/Btk/Vav3/Ptprc/Nsd2/Bmi1/Stat5b/Pcid2/Nckap1l/Atad5/Gpr183/Shld3/Atp11c/Prlr/Ighm/Tnfrsf4/Tgfb1/Shld1/Spi1/Msh2/Il2rg/Cdkn1a
GO:0048844	artery morphogenesis	0.396438	1.66131	0.00114601	0.0337435	Tfap2b/Chd7/Tgfb2/Prox1/Tgfbr2/Nfatc3/Vegfa/Comp/Kat6a/Adgrf5/Cited2/Tgfbr1/Efemp2/Acvrl1/Stra6/Jag1/Bmpr1a/Prrx1/Nf1/Zmiz1/Folr1/Hey2/Eng/Hes1/Edn1/Six1
GO:0002377	immunoglobulin production	0.37767	1.6599	0.00112851	0.0337435	Icosl/Ephb2/Rif1/Lilrb4a/Tfrc/Kmt5b/Pagr1a/Pms2/Bcl6/Btk/Ptprc/Nsd2/Ezh2/Nbn/Fcgr2b/Traf6/Sanbr/Atad5/Cd86/Prkdc/Shld3/Yy1/Ighm/Tnfrsf4/Tgfb1/Shld1/Rnf168/Il13ra1/Msh2/Il2rg/Parp3/Rev1/Polb/Pcyt1a/Sash3/Msh6
GO:0055088	lipid homeostasis	0.33342	1.57525	0.00114386	0.0337435	Rora/Tlcd4/Angptl4/Lima1/Ldlrap1/Ttc39b/Alms1/Med13/Etnppl/Cert1/Rab30/Mtch2/Abcd1/Ehd1/Apoa2/Ddx3x/Mylip/Hsdl2/Abca5/Pnpla3/Abca1/Cd24a/Plpp6/Hpn/Errfi1/C1qtnf3/Sesn2/Pnpla1/Nr1d2/Lcat/Nr1h3/Osbpl11/Cav1/Ormdl1/Tgfb1/Cebpa/Gramd1b/Abcg1/Insig1/Mia2/Sec24a/Adora1/Rbp1/Apoc3/Lrp5/Tm6sf2/Tlcd3b
GO:0072522	purine-containing compound biosynthetic process	-0.295362	-1.50665	0.00114105	0.0337435	Hprt1/Sirt4/Pank2/Ndufa12/Idh2/Ppcdc/Coasy/Ndufb3/Atp5f1b/Bckdk/Nadk/Atp5mc1/Gucy2e/Ampd2/Acly/Atp5me/Ndufb11/Vdac1/Atp5mf/Pnp/Ndufb7/Nppc/Nadsyn1/Nme7/Ndufa11/Ndufb9/Trem2/Sdhb/Acsl5/Afmid/Ndufc1/Atp5mg/Gucy2f/Atp5f1e/Adcy10/Gucy2g/Ndufs3/Mpc2/Ndufs7/mt-Nd4l/Ada/Prpsap2/Prps2/Gucy1b1/Ak1/Mlycd/Atp5f1c/Ndufs6/Gmpr/Ndufa1/Aldoa/Dck/Ndufa8/Snca/Nt5e/Adcy8/Aprt/Ndufb5/Map2k1/Pdha1/Impdh1/Ndufv1/Adcy…
GO:0042756	drinking behavior	-0.577582	-1.87388	0.00117466	0.0342562	Penk/Ar/Tmem63b/Hcrt/Ace2/Npy/Tacr3/Apln/Tacr1/Oxt/Cartpt/Mmp17/Npy2r/Hrh3/Drd2/Slc24a4
GO:1990830	cellular response to leukemia inhibitory factor	0.348851	1.60305	0.00116984	0.0342562	Rif1/Shmt1/Ctbp2/Klf4/Gclm/Icam1/Pax6/Tfrc/Smarca5/Ncl/Pcolce/Hnrnpu/Cacnb4/Adam23/Otx2/Mynn/Bclaf1/Ubxn2a/Gnpnat1/Sox17/Sycp3/Eps8/Creb1/Hk2/Fzd4/Mir374b/Nol8/Rnmt/Sdad1/Ubtf/Spry4/Jarid2/Pml/Abcd4/Polr1f/Gtf2h1/Eed/Mat2a/Sirt1/Ildr1/Lrrc2/Mkrn1/Vegfc/Trim2/Kdm3a
GO:0042770	signal transduction in response to DNA damage	0.322307	1.57023	0.00118047	0.0342618	Topbp1/Lyn/Cry1/Uimc1/Mbtps2/Ddx5/Cdc14b/Mbd4/Sp100/Dot1l/Foxn3/Donson/Cd44/Foxo3/Zmpste24/Chek1/Parp9/Ppm1d/Trim39/Cops3/Rbm38/Nbn/Dyrk1a/Eif2ak4/Sesn2/Mre11a/Taok1/Foxm1/Clock/Atad5/Creb3l1/Rad51/Hus1/Prkdc/Snai1/Atrx/Gadd45a/Npm1/Dtx3l/Rnf168/Msh2/Atr/Ufl1/Wac/Brcc3/Pcbp4/Rad17/Pml/Marchf7/Chek2/Cdkn1a/Ier3/Sirt1/Mus81/Cul4a/E2f1/Zfp830/Tti1/Yju2/Cdk1/Ccng1/Twist1/Spred2/Usp28/Dgkz/Triap1/Rad1
GO:0098534	centriole assembly	0.464046	1.77618	0.00119077	0.034397	Cep76/Kat2b/Alms1/Cep120/Cep72/Cep85/Wdr62/Stil/Ccdc78/Cdk5rap2/Cep44/Npm1/Rbm14/Cep192/Cep135/Cpap/Cep295/Spice1/Cdk2/E2f4/Chmp2a/Rttn
GO:0141087	positive regulation of inflammasome-mediated signaling pathway	0.521324	1.8594	0.00120398	0.0346143	Ptpn22/Lats1/Tlr4/Btk/Ddx3x/Stmp1/Dhx33/Zdhhc5/Nlrp3/Lats2/Casp4/Brcc3/Gbp5/Usp50/Gbp2
GO:2000171	negative regulation of dendrite development	-0.730277	-1.97506	0.00122049	0.0347016	Fat3/Gsk3a/Bcl11a/D130043K22Rik/Carm1/Cyth2/Sez6
GO:0031570	DNA integrity checkpoint signaling	0.36655	1.68386	0.00122409	0.0347016	Topbp1/Lyn/Cry1/Uimc1/Mbtps2/Cdc14b/Mbd4/Dot1l/Foxn3/Donson/Chek1/Parp9/Mdc1/Trim39/Nbn/Eif2ak4/Mre11a/Taok1/Clock/Creb3l1/Rad51/Hus1/Prkdc/Nae1/Dtx3l/Rnf168/Msh2/Atr/Ufl1/Wac/Brcc3/Rad17/Chek2/Cdkn1a/Ier3/Mus81/Cul4a/E2f1/Zfp830/Dna2/Tti1/Cdk1/Ccng1/Usp28/Dgkz/Triap1/Rad1
GO:0099084	postsynaptic specialization organization	-0.390121	-1.65654	0.00121675	0.0347016	Csmd2/Prickle2/Shank1/Gap43/Lrfn1/Wnt5a/Zdhhc12/Cntnap2/Psd/Prickle1/C1ql2/Ptprs/Cit/Lrrtm1/Lrfn4/Mpp2/Nptxr/Syngap1/Ptk2b/Dbn1/Sipa1l1
GO:0046597	host-mediated suppression of symbiont invasion	0.548431	1.81126	0.00124537	0.034838	Ifitm3/Trim12c/Trim59/Trim30d/Nbn/Ifitm2/Mre11a/Trim30a/Ifitm7/Mid2/Rad50/Ciita
GO:0007062	sister chromatid cohesion	0.461278	1.79272	0.00124449	0.034838	Rec8/Smc3/Ppp2r1b/Slf2/Rb1/Wapl/Pds5a/Sycp3/Stag2/Smc1a/Mre11a/Nipbl/Stag3/Mcmbp/Slf1/Kif22/Recql4/Naa50/Atrx
GO:0001909	leukocyte mediated cytotoxicity	0.373776	1.66878	0.00125484	0.034838	Crtam/Fcgr3/Rnf19b/Dao/H2-D1/Ctsh/Tyrobp/Ctsc/Stxbp2/B2m/Gzmm/Ncf1/Ptprc/Kctd9/Havcr2/Nectin4/Stat5b/Fcgr2b/Rab27a/Nckap1l/Kif5b/Arl8b/Fcgr4/Unc13d/Fcgr1/Scnn1b/Cebpg/Tgfb1/Clec2d/Spi1
GO:0000077	DNA damage checkpoint signaling	0.363288	1.64494	0.00125095	0.034838	Topbp1/Lyn/Cry1/Uimc1/Mbtps2/Cdc14b/Mbd4/Dot1l/Foxn3/Donson/Chek1/Parp9/Trim39/Nbn/Eif2ak4/Mre11a/Taok1/Clock/Creb3l1/Rad51/Hus1/Prkdc/Dtx3l/Rnf168/Msh2/Atr/Ufl1/Wac/Brcc3/Rad17/Chek2/Cdkn1a/Ier3/Mus81/Cul4a/E2f1/Zfp830/Tti1/Cdk1/Ccng1/Usp28/Dgkz/Triap1/Rad1
GO:0062207	regulation of pattern recognition receptor signaling pathway	0.329067	1.58816	0.00125748	0.034838	Ptpn22/Appl2/Lyn/Lats1/Zc3hav1/Tlr3/Lbp/Smpdl3a/Rsad2/Oasl1/Tlr4/Itch/Btk/Ddx3x/Stmp1/Mfhas1/Cd300a/Eif2ak2/Dhx33/Pdpk1/Irgm1/Zdhhc5/Dhx58/Nlrp3/Rictor/Lamp2/Pik3ap1/Zcchc3/Ppp6c/Trim30a/Prkdc/Lats2/Nr1h3/Gpr108/Casp4/Cav1/Peli3/Cd300lf/Hmgb1/Ticam2/Tasl/Rnf115/Brcc3/Zdhhc3/Gbp5/Slc15a3/Usp50/Rnf39/Nploc4
GO:0007210	serotonin receptor signaling pathway	-0.728248	-1.96957	0.00129737	0.0351442	Gper1/Htr4/Htr2c/Htr3a/Gnas/Htr2b/Htr1a/Chrna10/Htr6/Htr7
GO:1902946	protein localization to early endosome	0.684253	1.90541	0.00129587	0.0351442	Msn/Egfr/Vegfa/Sorl1/Rock2/Rdx/Arl8b/Dtx3l
GO:0043484	regulation of RNA splicing	0.326889	1.5833	0.00128815	0.0351442	Srsf1/Kat2b/Ddx5/Ccnl2/Ncl/Srsf10/Ern1/Arglu1/Hnrnpu/Rbm25/Mbnl1/Srsf4/Ccnl1/Srrm1/Srrm4/Ahnak/Ptbp3/Tada1/Fam50a/Ythdc1/Rbm38/Wdr77/Dyrk1a/Slc38a2/Qki/Rbm47/Mbnl2/Zfp638/Rbm12/Nsrp1/Supt20/Son/Taf12/Srsf2/Zbtb7a/Ptbp1/Upf3b/Fus/Nova1/Rbm12b2/Npm1/Srsf6/Clk4/Rbm14/Thrap3/Tra2a/Atxn7/Pcbp4/Sfswap/Hnrnph3/Rbm22/Mettl4/Hnrnpk/Rrp1b/Hnrnph1/Hnrnpa2b1/Tra2b/Hnrnpll/Rbm39/Sap18/Fmr1/Ildr1/Clk1/Setx/Ptb…
GO:0000725	recombinational repair	0.321241	1.56504	0.00128387	0.0351442	Topbp1/Rif1/Rec8/Zgrf1/Mcm9/Mcm8/Ing3/Ercc4/Rpa1/Smc6/Chek1/Was/Mbtd1/Rev3l/Epc1/Mdc1/Brd8/Epc2/Nbn/Dyrk1a/Csnk2a1/Xrcc6/Mre11a/Nipbl/Ercc5/Helq/Xrcc2/Helb/Ppp4r2/Rad51/Recql4/Rtel1/Hus1/Mcm4/Cdc7/Zfyve26/Prkdc/Rmi1/Fus/Shld3/Ooep/Yy1/Hrob/Shld1/Actl6a/Ufl1/Setd2/Inip/Poln/Rad50/Mcm5/Mus81/Nucks1/Chd4/Rad21/Pias1/Recql/Rmi2/Skp2/Wrn/Dmap1/Rad54l/Slx1b
GO:0003012	muscle system process	-0.26137	-1.40494	0.00128436	0.0351442	Tacr3/Ehd3/Becn1/Pkp2/Large1/Ghsr/Camta2/Ednra/Camk2g/Adcy10/Agrn/Foxo1/Adra2a/Srf/Tnnc1/Bin1/Myl6b/Trim72/Ada/Gdf1/Cers1/Cdk9/Pla2g6/Akap6/Pgam2/Cttn/Chrm3/Ppp1r13l/Ptk2/Akap13/Fkbp1a/Ndufs6/Gtf2i/Aldoa/Chrm2/Bmp2/Sod1/Eef2/Apbb1/Sorbs2/Myh2/Smpd3/Bmp4/Gja5/Tnnt2/Hcn4/Gnas/Gpd1l/Hsbp1/Trpv1/Npy1r/Stac3/Map2k1/Fdps/Aif1/Mb/Htr2b/Fkrp/Synm/Dsg2/Htr1d/Gsk3a/Tacr1/Oga/Prkca/Atp1a3/Eno1/Actn2/Oxt/Pro…
GO:0006302	double-strand break repair	0.288375	1.49104	0.00130371	0.0351598	Topbp1/Rif1/Uimc1/Rec8/Dpf3/Mcm9/Dek/Slf2/Mcm8/Ing3/Tdp2/Kmt5b/Ercc4/Paxx/Rpa1/Smarcd2/Smc6/Chek1/Was/Mbtd1/Nsd2/Rev3l/Parp9/Epc1/Mdc1/Spire1/Brd8/Epc2/Brd7/Nbn/Dyrk1a/Csnk2a1/Xrcc6/Mre11a/Nipbl/Ercc5/Helq/Foxm1/Xrcc2/Slf1/Helb/Ppp4r2/Rad51/Recql4/Rtel1/Hus1/Ercc6l2/Mcm4/Cdc7/Zfyve26/Prkdc/Zbtb7a/Rmi1/Fus/Shld3/Top2b/Ooep/Yy1/Hmgb1/Meioc/Shld1/Dtx3l/Ppp4r3a/Rnf168/Msh2/Atr/Actl6a/Ufl1/Brcc3/Setd2…
GO:0099563	modification of synaptic structure	-0.42329	-1.74772	0.00131639	0.0351903	Ctnna2/Pgrmc1/Rest/Dlgap4/Cttnbp2/Filip1/Baiap2/Cttn/Ptk2/Cfl1/Rapgef2/Limk1/Marcks/Kalrn/Pdxp/Wasf1/Myo5b/Phactr1/Itpka/Rhob/Dlgap3/Mrtfb/Mrtfa/Strn4/Camkv
GO:0002286	T cell activation involved in immune response	0.370101	1.64882	0.00131094	0.0351903	Icosl/Rora/Rorc/Icam1/Itgal/Malt1/Tyrobp/Sema6d/Bcl6/Lgals3/Fgl2/Havcr2/Eif2ak4/Rab27a/Nlrp3/Il6ra/Nckap1l/Lcp1/Cd46/Gpr183/Rc3h2/Atp7a/Zbtb7b/Entpd7/Ripk2/Tgfb1/Itgb8/Hmgb1/Slfn2/Ep300/Brd2/Loxl3
GO:0032230	positive regulation of synaptic transmission, GABAergic	-0.643034	-1.95116	0.00132746	0.0352432	Tacr1/Zdhhc12/Adra1a/Cckbr/Oxtr/Tac1/Adora2a/Hap1
GO:0021536	diencephalon development	-0.389251	-1.65285	0.00132993	0.0352432	Ghrh/Ncam1/Sema3a/Shh/Bmp2/Isl1/Bmp4/Olig2/Six3/Atp1a3/Nkx2-1/Otp/Wnt5a/D130043K22Rik/Otx1/Nrp2/Uqcrq/Ndnf/Duox2/Drd2/Arx/Hap1
GO:0006171	cAMP biosynthetic process	-0.676844	-1.93612	0.00135999	0.0354237	Adcy10/Adcy8/Adcy3/Ntsr1/Ptger3/Cartpt/Adcy2/Adcy5
GO:0044818	mitotic G2/M transition checkpoint	0.43026	1.70019	0.00135855	0.0354237	Topbp1/Uimc1/Mbtps2/Cdc14b/Mbd4/Foxn3/Donson/Chek1/Chfr/Trim39/Nbn/Mre11a/Taok1/Creb3l1/Hus1/Nae1/Atr/Brcc3/Rad17/Inip/Cdkn1a/Rad50/Ier3/Zfp830/Cdk1/Ccng1
GO:0003407	neural retina development	0.393578	1.69925	0.00135981	0.0354237	Calb1/Atoh7/Sox9/Neurod1/Tfap2b/Prom1/Lhx1/Megf11/Tgfb2/Ccdc66/Rs1/Alms1/Hcn1/Barhl2/Cfh/Hipk1
GO:0046651	lymphocyte proliferation	0.296292	1.51012	0.00135418	0.0354237	Icosl/Ptpn22/Crtam/Tnfsf9/Ephb2/Il20rb/Lyn/Pde5a/Msn/Kitl/Itgal/Flt3/Lilrb4a/Itgb2/Bst1/Tfrc/Malt1/Tyrobp/Tgfbr2/Tlr4/Bcl6/Lgals3/Cd44/Cd38/Itch/Sos2/Slc4a1/Btk/Vav3/Ptprc/Kctd9/Nck1/Havcr2/Vcam1/Cd300a/Cd24a/Bmi1/Irgm1/Stat5b/Fcgr2b/Traf6/Pura/Nckap1l/Slc4a2/Atad5/Cd70/Sos1/Cd46/Gpr183/Rc3h2/Zbtb7b/Lmbr1l/Cd86/Ncstn/Prlr/Ighm/Cd59a/Il6st/Tnfrsf4/Ripk2/Tgfb1
GO:0045814	negative regulation of gene expression, epigenetic	0.323549	1.55895	0.00138303	0.0357186	Rif1/Mphosph8/Phf2/Piwil2/Dnmt3b/Smarca5/Dot1l/Bcl6/Hnrnpu/Zfp445/Rb1/Chek1/Ctcf/Ezh2/Epc1/Ppm1d/Baz2a/Cdyl/Ythdc1/Bmi1/Dyrk1a/Setdb1/Tdrd12/Tdrd9/Pcid2/Firre/Pcgf5/Suz12/Usp7/Ubr5/Upf3b/Mis18bp1/Atrx/Ubtf/Wdhd1/Mbd2/Kat8/Crebzf/Jarid2/Hmgb1/Rlf/Uty/Pole3/H1f0/Atf7ip/Mettl4/Hnrnpk/Tdrd5/Lmnb2/Eed/Uhrf1/Sirt1/Ezh1/Sin3a/Suv39h2/Cdk2
GO:0002694	regulation of leukocyte activation	0.255597	1.38399	0.00138022	0.0357186	Icosl/Rora/Ptpn22/Crtam/Tnfsf9/Ephb2/Il16/Cnr1/Rif1/Zbtb46/Il20rb/Lyn/Pde5a/Rorc/Kitl/Pglyrp1/Lbp/Itgal/Flt3/Lilrb4a/Milr1/Bst1/Tfrc/Tnfaip8l2/Malt1/Kmt5b/Tyrobp/Tgfbr2/Tlr4/Nedd9/Pagr1a/Pms2/Ctsc/Bcl6/Lgals3/Cd44/Cd38/Itch/Fam76b/B2m/Sos2/Fgl2/Smarcd2/Slc4a1/Foxo3/Ptpre/Btk/Vav3/Ptprc/Nsd2/Nck1/Havcr2/Vcam1/Adgrf5/Mfhas1/Cd300a/Cd24a/Il15ra/Brd7/Plpp6/Bmi1/Zfp36l1/Irgm1/Stat5b/Fcgr2b/Xrcc6/Sh2b3…
GO:1900147	regulation of Schwann cell migration	0.693103	1.89498	0.00141641	0.0362731	Vim/Ptprz1/Fubp1/Cers2/Fgf9/Ntm/Nf1/Tiam1/Fas/Rras
GO:0046599	regulation of centriole replication	0.576201	1.85307	0.00141384	0.0362731	Cep76/Kat2b/Alms1/Cep120/Stil/Cdk5rap2/Npm1/Rbm14/Cep192/Cpap/Cep295/Spice1
GO:0042744	hydrogen peroxide catabolic process	-0.639198	-1.93952	0.00144206	0.0367754	Gpx1/Snca/Mt3/Prdx5/Duox1/Prdx4/Prdx2/Pxdn/Nnt/Duox2
GO:0002381	immunoglobulin production involved in immunoglobulin-mediated immune response	0.45377	1.77568	0.00144897	0.0367978	Icosl/Rif1/Tfrc/Kmt5b/Pagr1a/Pms2/Bcl6/Btk/Ptprc/Nsd2/Nbn/Sanbr/Atad5/Shld3/Ighm/Tgfb1/Shld1/Rnf168/Msh2/Parp3/Pcyt1a/Msh6/Nfkbiz
GO:0035418	protein localization to synapse	-0.359089	-1.65052	0.00152468	0.0385599	Ghsr/Git1/Sv2a/Epb41l1/Agrn/Grip1/Baiap2/Bsn/Nrxn2/Cdk5/Vamp2/Mapt/Nphs1/Kalrn/Dlg3/Map2k1/Gpc4/Shank1/Iqsec2/Klc1/Nptx2/Lrrc7/Zdhhc12/Musk/Snap47/Cnih3/C1ql2/Dok7/Lrrtm1/Hras/Map1a/Camk2a/Vwc2/Nptxr/Grip2/Dlg4/Olfm2/Cacng3
GO:0071870	cellular response to catecholamine stimulus	-0.46003	-1.80796	0.00156597	0.0394404	Drd3/Htr4/Htr2c/Gm527/Drd1/Alk/Gnao1/Drd5/Htt/Gna14/Gna11/Dnm2/App/Gnb5/Rgs9/Htr3a/Gnas/Ptger1/Htr2b/Palm/Dtnbp1/Htr1a/Aplp1/Klf16/Chrna10/Htr6/Htr7/Drd2/Adcy5
GO:0036314	response to sterol	0.545951	1.85321	0.0016009	0.0399898	Rora/Rorc/Ptch1/Tgfbr2/Abca1/Tgfbr1/Inhbb/Ccl3/Insig2/Ccr5/Tgfb1/Gramd1b/Insig1
GO:0009206	purine ribonucleoside triphosphate biosynthetic process	-0.351823	-1.60203	0.00159837	0.0399898	Ndufb3/Atp5f1b/Atp5mc1/Atp5me/Ndufb11/Atp5mf/Pnp/Ndufb7/Nme7/Ndufa11/Ndufb9/Trem2/Sdhb/Ndufc1/Atp5mg/Atp5f1e/Adcy10/Ndufs3/Ndufs7/mt-Nd4l/Atp5f1c/Ndufs6/Ndufa1/Aldoa/Ndufa8/Ndufb5/Map2k1/Impdh1/Ndufv1/Eno1/Ndufa2/Ndufs5/Ndufa13/Pid1/Nme1/Uqcc3/Atp5po/Ndufb6/Ppara/Ndufs8/Ndufb8
GO:0001773	myeloid dendritic cell activation	0.563453	1.83962	0.00162888	0.0404423	Camk4/Tnfsf9/Tgfbr2/Havcr2/Traf6/Tgfb1/Itgb8/Hmgb1/Spi1/Flt3l/Pirb/Dock2
GO:0006937	regulation of muscle contraction	-0.324237	-1.5613	0.00163784	0.0404423	Tacr3/Ehd3/Pkp2/Ghsr/Adcy10/Agrn/Adra2a/Srf/Tnnc1/Bin1/Ada/Akap6/Cttn/Chrm3/Fkbp1a/Chrm2/Sod1/Gja5/Tnnt2/Hcn4/Gnas/Map2k1/Dsg2/Tacr1/Prkca/Eno1/Oxt/Prok2/Ptger3/Myh7/Nr4a1/Gucy1a1/Adra1a/Adra2c/Tnnt1/Cacna1c/Oxtr/Adrb1/Npy2r/Tnni3k/Hdac4/Cacnb1/Dsc2/Adra1b/Htr7/Dbn1/Cacna1h/Scn5a
GO:0045786	negative regulation of cell cycle	0.274647	1.43993	0.00163893	0.0404423	Mapk12/Topbp1/Lyn/Cry1/Uimc1/Lats1/Kank2/Tsc22d2/Klf4/Mbtps2/Fam107a/Kat2b/Prox1/Cdc14b/Nek2/Cdkn1b/Cdk5rap1/Mbd4/Smarca5/Dot1l/Foxn3/Ccnf/Donson/Egfr/Cacnb4/Rb1/Zw10/Chek1/Gmnc/Chfr/Wapl/Parp9/Chmp4c/Angel2/Ezh2/Gtpbp4/Cdk5rap2/Mdc1/Trim39/Nme6/Brd7/Zfp36l1/Nbn/Dyrk1a/Eif2ak4/Mre11a/Zwilch/Mad2l1/Prpf4b/Dact1/Taok1/Ctdsp2/Tpra1/Clock/Creb3l1/Rad51/Apbb2/Recql4/Hus1/Prkdc/Lats2/Nae1/Atrx/Tgfb1/Ce…
GO:0008542	visual learning	-0.382899	-1.62588	0.00165062	0.0405667	App/Abl2/Pde8b/Nts/Lrrn4/Apbb1/Cdk5/Ppp1r1b/Atp1a3/Cacna1e/B3gat1/Ndrg4/Sgk1/Tuba1a/Mtor/Cacna1c/Synpo/Cck/B4galt2/Syngap1/Pianp/Adra1b/Drd2/Pde1b/Rgs14/Meis2
GO:0002367	cytokine production involved in immune response	0.369166	1.62892	0.00171792	0.0418829	Kit/Tgfb2/Tlr3/Tlr7/Malt1/Rsad2/Pkp3/Dhx36/Tlr4/Bcl6/B2m/Atg5/Apoa2/Sema7a/Tlr2/Nlrp3/Traf6/Mapkapk2/Ube2j1/Rigi/Irf5/Hfe/Casp4/Ripk2/Tgfb1/Bst2/Tgfb3/Il1r1/Nod1/Angpt1
GO:0002718	regulation of cytokine production involved in immune response	0.369166	1.62892	0.00171792	0.0418829	Kit/Tgfb2/Tlr3/Tlr7/Malt1/Rsad2/Pkp3/Dhx36/Tlr4/Bcl6/B2m/Atg5/Apoa2/Sema7a/Tlr2/Nlrp3/Traf6/Mapkapk2/Ube2j1/Rigi/Irf5/Hfe/Casp4/Ripk2/Tgfb1/Bst2/Tgfb3/Il1r1/Nod1/Angpt1
GO:0007095	mitotic G2 DNA damage checkpoint signaling	0.482742	1.7737	0.00178267	0.0432883	Topbp1/Uimc1/Mbtps2/Cdc14b/Mbd4/Foxn3/Donson/Chek1/Trim39/Nbn/Mre11a/Taok1/Creb3l1
GO:0031099	regeneration	0.308226	1.51302	0.00179815	0.043491	Nrep/Slc22a4/Srsf1/Klf4/Itpr1/Diaph2/Ptch1/Mmp2/Fzd7/Cdkn1b/Igsf10/Nfib/Selenon/Egfr/Cd9/Fbxw10/Apoa2/Ntrk3/Top1/Kremen1/Ezh2/Chl1/Hopx/Csnk2a1/Wnt7a/Bdnf/Lcp1/Prrx1/Braf/Inpp5f/Cers2/Adh1/Apod/Dusp10/Scarf1/Cpt1a/Lrig2/Mymk/Vtn/Ucp2/Tgfb1/Cebpa/mt-Cytb/Wnt10b/Folr1/Nr0b2/Adam17/Flna/Abcb1a/Vps54/Ifrd1/Cdkn1a/Pnpt1/Ctnna1/Nfix/Stk24/Ezh1/Ppard/Enpp1
GO:0016049	cell growth	-0.247228	-1.3512	0.00180735	0.0435407	Smurf1/Ednra/Syt3/Meaf6/Adcy10/Ing4/Akt1/Bcan/Bbc3/Slit3/Smarca4/Nkx6-1/Srf/Sema3a/Ccn3/Rnd2/Sfn/Map2/Slitrk1/Auts2/Map1b/Akap6/Smarca2/Cttn/Ptk2/Akap13/Cdkn2d/Tsg101/Pabir1/Exosc2/Trim32/Cfl1/Arhgap32/Anapc2/Klhl22/Cdk5/Ilk/Limk1/Sorbs2/Igfbpl1/Postn/Hdgfl2/Mapt/Lhx2/Shtn1/Lamtor1/Apoe/Mt3/Tnr/Frzb/Xbp1/Kif26a/Robo1/Spag6/Fdps/Ccdc85b/Gsk3a/Twf2/L1cam/Ip6k2/Mgll/Kif14/Eno1/Lpar3/Ctnnd2/Ndn/Wasf1…
GO:0007099	centriole replication	0.470115	1.7649	0.00189219	0.0454051	Cep76/Kat2b/Alms1/Cep120/Cep72/Cep85/Wdr62/Stil/Cdk5rap2/Cep44/Npm1/Rbm14/Cep192/Cep135/Cpap/Cep295/Spice1/Cdk2
GO:1903532	positive regulation of secretion by cell	-0.264565	-1.40477	0.00192748	0.0460705	Cacna1d/Hgs/Snx4/Vdr/Gna14/Arrb1/Tnfrsf11a/Trem2/Unc13a/Ang/Gna11/Cacna1i/Psmd9/Tacr3/Apbb3/Gck/Dpysl2/Apln/Scamp5/Oprk1/Mpc2/Nkx6-1/Ghrh/Aacs/Unc13b/Ppia/Ucn3/Pla2g6/Capn10/Cacna1b/Chrm3/Septin5/Rab3d/Tsg101/Fto/Syt10/Mlxipl/Arf1/Bmp2/Isl1/Apbb1/Cdk5/Snca/Smpd3/Ncs1/Clasp1/Adcy8/Glul/Gnas/Doc2g/Gab2/Rab2b/Hyal3/Rgcc/Nell2/Mrgpre/Glp1r/Lepr/Bad/Gabbr1/Ntsr1/Tacr1/Oga/Prkca/Fgfr4/Myo18a/Mfn2/Gpr27…
GO:0060759	regulation of response to cytokine stimulus	0.320104	1.53283	0.0019533	0.0465054	Naip5/Klf4/Stat2/Hif1a/Tlr4/Naip6/Parp14/Hipk1/Ptprc/Mapk7/Parp9/Tlr2/Cd24a/Irgm1/Sh2b3/Nlrc5/Rbm47/Ifih1/Rigi/Xiap/Ptpn2/Il1r2/Irak1/Ext1/Casp4/Spata2/Il6st/Cav1/Ripk2/Peli3/Usp18/Ube2k/Cd300lf/Ikbke/Ticam2/Rffl/Adam17/Il1r1/Anxa4/Smim30/Nkiras2/Ythdf3/Angpt1/Irf3/Ripk1/Ythdf2/Dnaja3/Isg15/Dhx9/Edn1/Tnfrsf11b/Ccdc3
GO:0032365	intracellular lipid transport	0.456459	1.72233	0.00198966	0.0471406	Abcd2/Ldlrap1/Cert1/Stard4/Abcd1/Abcd3/Acacb/Abca1/Anxa2/Arl8b/Tpcn2/Gramd1b/Abcg1/Star/Vps54/Abcd4/Syt7/Relch/Gramd1c/Npc2/Cpt2/Serac1/Tmem97/Plekha8/Tmem41b/Sgpp1/Cpt1b
GO:0010972	negative regulation of G2/M transition of mitotic cell cycle	0.414092	1.71418	0.00201765	0.0471406	Topbp1/Uimc1/Mbtps2/Cdc14b/Mbd4/Foxn3/Donson/Chek1/Chfr/Chmp4c/Gtpbp4/Trim39/Nbn/Mre11a/Taok1/Creb3l1/Hus1/Nae1/Atr/Brcc3/Rad17/Inip/Cdkn1a/Rad50/Ier3/Pdik1l/Zfp830/Rad21/Cdk1/Ccng1
GO:0002275	myeloid cell activation involved in immune response	0.386357	1.66527	0.00201866	0.0471406	Lyn/Kit/Lbp/Lilrb4a/Itgb2/Crhr1/Milr1/Tyrobp/Ptgdr/Stxbp2/Btk/Havcr2/Cd300a/Pdpk1/Myo1f/Ccl3/Vamp8/Lat/Unc13d/Scnn1b/Snap23/Hmgb1/Spi1/Pi4k2a/Dnase1/Cd84/Nr4a3/Pla2g3/Ptafr/Hmox1/Gata2/Dock2/Foxf1/Plcg2/Enpp3/Fcer1g/Anxa3
GO:0050769	positive regulation of neurogenesis	-0.277711	-1.44897	0.00201616	0.0471406	Ttbk1/Grip1/Bag1/Nap1l1/Camk2b/Nkx6-1/Srf/Plxnb1/Golga2/Bin1/Rnd2/Baiap2/Slitrk1/Map1b/Shh/Ntrk2/Bex1/Ptk2/Akap5/Trim32/Arhgap32/Anapc2/Bmp2/Xrcc4/Runx2/Ilk/Limk1/Marcks/Mapt/Shtn1/Foxg1/Apoe/Cux2/Neurl1a/Olig2/Snap91/Kalrn/Robo1/Smarcd3/Map2k1/Fbxo31/Twf2/Map6/L1cam/Mfn2/Lpar3/Ctnnd2/Otp/Spint1/Wnt5a/Sox11/Bcl11a/Stk25/Cdh4/Myo5b/Numbl/Itpka/Sgk1/Dcx/Dmrta2/Dscam/Bhlhb9/Mtor/Wnt2/Plxnc1/Dct/Islr…
GO:0002757	immune response-activating signaling pathway	0.255025	1.36904	0.00200146	0.0471406	Icosl/Ptpn22/Appl2/Lyn/Lats1/Zc3hav1/Tlr3/Lbp/Tlr7/Smpdl3a/Malt1/Rsad2/Oasl1/Tyrobp/Tlr4/Lgals3/Cacnb4/Cd38/Itch/Prkd2/Btk/Dpp8/Vav3/Ddx3x/Ptprc/Ranbp2/C3ar1/Nck1/Havcr2/Myo1g/Tmem126a/Stmp1/Mfhas1/Cd300a/Eif2ak2/Tlr2/Shc1/Dhx33/Pdpk1/Rnf135/Traf3ip3/Fpr2/Tlr13/Irgm1/Zdhhc5/Dhx58/Rps6ka3/Nlrp3/Rictor/Traf6/Mapkapk2/Nckap1l/Ifih1/Cd47/Rigi/Braf/Phpt1/Sos1/Irf5/Xiap/Fyb2/Lat/Rc3h2/Lamp2/Ptpn2/Pik3a…
GO:0099504	synaptic vesicle cycle	-0.282505	-1.44951	0.00202735	0.0471629	Actb/Cdh2/Cadps/Stxbp1/Dnajc6/Ap3s1/Stxbp3/Dnajc5/Rab3a/Ap2a2/Syt11/Pfn2/Prkaca/Syt1/Atp6v1f/Prkcg/Rab7/Atp6v1d/Npy/Slc32a1/Tprg1l/Mylk/Calm3/Cacna1d/Tor1a/Clta/Unc13a/Otof/Dnm2/Trim9/Rims3/Dnm1/Brsk1/Cplx2/Pip5k1c/Syn3/Git1/Scamp5/Sv2a/Atp6v0c/Casp3/Atp6v1b2/Bin1/Unc13b/Sncb/Bsn/Ppp3cc/Cacna1b/Septin5/Syt10/Ap2a1/Cdk5/Atp6v0d1/Slc17a8/Snca/Ncs1/Vamp2/Ap2s1/Atp8a1/Ctbp1/Ap3b2/Snap91/Doc2g/Npy1r/A…
GO:0098586	cellular response to virus	0.469193	1.78536	0.00204149	0.0473115	Cxcl10/Zc3hav1/Tlr3/Flt3/Tlr7/Hif1a/Ddx3x/Irgm1/Nlrp3/Ifih1/Irf5/Nfkb1/Pou2f2/Ext1/Tgfb1/Ikbke/Lgals9/Rrp1b/Irf3/Fmr1
GO:0050770	regulation of axonogenesis	-0.311093	-1.52424	0.00205381	0.0474167	Ndel1/Amigo1/Ulk2/Nin/Crabp2/Brsk1/Smurf1/Adcy10/Srf/Plxnb1/Sema3a/Golga2/Rnd2/Map2/Slitrk1/Map1b/Ntrk2/Ephb3/Ptk2/Arhgap32/Anapc2/Cdk5/Ilk/Limk1/Mark2/Mapt/Shtn1/Apoe/Mt3/Tnr/Snap91/Robo1/Map2k1/Twf2/Map6/L1cam/Efnb3/Lpar3/Ctnnd2/Wnt5a/Bcl11a/Stk25/Cdh4/D130043K22Rik/Myo5b/Dcx/Dscam/Trim46/Ptprs/Cit/Plxnc1/Syngap1/Islr2/Lrp4/Plxnd1/Slit1/Tiam2/Dbn1/Sipa1l1
GO:0015844	monoamine transport	-0.365354	-1.64993	0.00208943	0.0480568	Chrna6/Chrna7/Adora2b/Chga/Actb/Adora3/Cadps/Drd3/Rab3a/Pink1/Syt11/Drd1/Syt1/Slc6a3/Slc22a3/Xlr4b/Agtr2/Comt/Kcnb1/Tor1a/Gck/Ghsr/Xlr4a/Fev/Adra2a/Grm2/Oprk1/Snca/Smpd3/Nat8l/Nisch/Xbp1/Gabbr1/Hc/Oxt/Ptger3/Vip/Cartpt/Adra2c/Chrna4/Gdnf/Dtnbp1/Htr1a/Oxtr/Npy2r/Htr6/Stx1a/Htr7/Rab3b/Hrh3/Drd2/Adora2a
GO:0002279	mast cell activation involved in immune response	0.447425	1.72744	0.00213566	0.0489355	Lyn/Kit/Lilrb4a/Crhr1/Milr1/Ptgdr/Stxbp2/Btk/Cd300a/Pdpk1/Vamp8/Lat/Unc13d/Snap23/Cd84/Nr4a3/Pla2g3/Hmox1/Gata2/Foxf1/Enpp3/Fcer1g
GO:1901988	negative regulation of cell cycle phase transition	0.291285	1.45482	0.00215668	0.0492321	Topbp1/Lyn/Cry1/Uimc1/Kank2/Klf4/Mbtps2/Fam107a/Prox1/Cdc14b/Mbd4/Dot1l/Foxn3/Donson/Cacnb4/Rb1/Zw10/Chek1/Chfr/Parp9/Chmp4c/Ezh2/Gtpbp4/Cdk5rap2/Mdc1/Trim39/Brd7/Zfp36l1/Nbn/Eif2ak4/Mre11a/Zwilch/Mad2l1/Prpf4b/Dact1/Taok1/Ctdsp2/Tpra1/Clock/Creb3l1/Rad51/Apbb2/Hus1/Prkdc/Nae1/Gas1/Dtx3l/Rnf168/Cep192/Msh2/Atr/Ufl1/Wac/Brcc3/Spc24/Bub3/Rad17/Inip/Chek2/Cdkn1a/Rad50/Ier3/Pdik1l/Mus81/Cul4a/Spdl1/E…
GO:0061572	actin filament bundle organization	-0.317195	-1.55937	0.00219366	0.0498893	Cfl1/Carmil1/Spire2/Limk1/Marcks/Ppm1e/Clasp1/Shtn1/Aif1/Rgcc/Fhod3/Shank1/Espn/Pdxp/Tacr1/Actg1/Arhgap28/Frmd7/Synpo2/Rab40b/Evl/Arhgap6/Fscn2/Myoc/Rapgef3/Phactr1/Add2/Pcdh15/Add1/Mtor/S100a10/Kank3/Src/Nox4/Baiap2l2/Synpo/Stmn1/Dmtn/Cx3cl1/Kctd13/Fscn1/Ptk2b/Tac1/Dbn1/Dpysl3
