# Supplementary material
Source: Research Square preprint supplement (doi:10.21203/rs.3.rs-10072088/v1)
Supplement: Supplementary file 4 [file 2577360c7a0a4a8efcd01c0b.xlsx]

## Sheet: Number of significant term_GSEA
Number of significant terms in GSEA
Broad cell type	Hallmark_P<05	Hallmark_Padj<05	GOBP_P<05	GOBP_Padj<05	KEGG_P<05	KEGG_Padj<05
Astrocyte	6	0	93	0	56	26
Endothelial	4	0	47	0	9	2
Excitatory Neuron	3	0	130	0	62	25
Inhibitory Neuron	8	0	239	2	35	0
Microglia	5	0	177	12	24	1
Oligodendrocyte	3	0	26	0	28	3
OPC	10	0	130	5	21	0
Other	9	4	440	183	94	60
Pericyte	3	0	52	0	6	0
Fine cell type	Hallmark_P<05	Hallmark_Padj<05	GOBP_P<05	GOBP_Padj<05	KEGG_P<05	KEGG_Padj<05
Astro-Fib	1	0	78	0	0	0
Astrocyte	12	0	184	0	0	0
Endothelial	2	0	134	0	0	0
ExN-CA1	2	0	196	0	0	0
ExN-CA1-Rspo2	9	0	356	59	0	0
ExN-CA3	12	3	425	112	0	0
ExN-DG-Drd1	5	1	120	0	0	0
ExN-DG-Drd2	6	0	142	0	0	0
ExN-DG-Zic1	7	0	239	3	0	0
ExN-NP	2	0	100	0	0	0
ExN-Sub	3	0	82	0	0	0
ExN-Sub-Foxp2	4	0	83	0	0	0
ExN-VGluT2-Trhr	3	0	131	0	0	0
InN-Glra2	2	0	126	0	0	0
InN-Isl1	2	0	52	0	0	0
InN-Ndnf	3	0	45	0	0	0
InN-SST	7	2	331	81	0	0
InN-VIP	3	0	190	1	0	0
Micro-Act	8	1	110	0	0	0
Micro-Homeo	8	2	271	75	0	0
MOL	4	0	86	0	0	0
OPC	8	0	104	1	0	0
Other	8	3	447	98	0	0
Pericyte	4	0	40	0	0	0
