# Supplementary material
Source: Research Square preprint supplement (doi:10.21203/rs.3.rs-10072088/v1)
Supplement: Supplementary file 5 [file 270791606a41377e77102d91.xlsx]

## Sheet: All DEG analysis Summary
GWI-associated changes
Condition	Comparison	DEG threshold type	Up-DEG number	Down-DEG number	Total DEG number	Up-GO terms number	Down-GO terms number	Total GO terms number	Up-KEGG terms number	Down-KEGG terms number	Total KEGG terms number
Basal	GW_Veh_PBS_vs_Ctrl_Veh_PBS	Padj < 0.05 + FC	0	0	0	0	0	0	0	0	0
	GW_Veh_PBS_vs_Ctrl_Veh_PBS	Padj < 0.05, no FC	0	0	0	0	0	0	0	0	0
	GW_Veh_PBS_vs_Ctrl_Veh_PBS	P < 0.05 + FC	156	209	365	22	14	36	4	1	5
	GW_Veh_PBS_vs_Ctrl_Veh_PBS	P < 0.05, no FC	896	847	1743	14	35	49	2	0	2
Immune-stimulated	GW_Veh_LPS_vs_Ctrl_Veh_LPS	Padj < 0.05 + FC	2	1	3	168	62	230	0	5	5
	GW_Veh_LPS_vs_Ctrl_Veh_LPS	Padj < 0.05, no FC	3	1	4	361	62	423	0	5	5
	GW_Veh_LPS_vs_Ctrl_Veh_LPS	P < 0.05 + FC	474	348	822	49	4	53	3	0	3
	GW_Veh_LPS_vs_Ctrl_Veh_LPS	P < 0.05, no FC	1009	866	1875	363	10	373	9	21	30
Condition	Comparison	DEG threshold type	Up-DEG number	Down-DEG number	Total DEG number	Up-GO terms number	Down-GO terms number	Total GO terms number	Up-KEGG terms number	Down-KEGG terms number	Total KEGG terms number
DeltaLPS	delta_LPS_response_GW_minus_Ctrl	Padj < 0.05 + FC	0	0	0	0	0	0	0	0	0
	delta_LPS_response_GW_minus_Ctrl	Padj < 0.05, no FC	0	0	0	0	0	0	0	0	0
	delta_LPS_response_GW_minus_Ctrl	P < 0.05 + FC	567	289	856	44	1	45	1	0	1
	delta_LPS_response_GW_minus_Ctrl	P < 0.05, no FC	1020	878	1898	41	72	113	3	11	14
LPS-induced changes
Condition	Comparison	DEG threshold type	Up-DEG number	Down-DEG number	Total DEG number	Up-GO terms number	Down-GO terms number	Total GO terms number	Up-KEGG terms number	Down-KEGG terms number	Total KEGG terms number
Control	Ctrl_Veh_LPS_vs_Ctrl_Veh_PBS	Padj < 0.05 + FC	52	7	59	116	0	116	7	5	12
	Ctrl_Veh_LPS_vs_Ctrl_Veh_PBS	Padj < 0.05, no FC	85	20	105	89	0	89	5	0	5
	Ctrl_Veh_LPS_vs_Ctrl_Veh_PBS	P < 0.05 + FC	382	543	925	396	3	399	28	1	29
	Ctrl_Veh_LPS_vs_Ctrl_Veh_PBS	P < 0.05, no FC	1347	1254	2601	414	6	420	23	1	24
GWI	GW_Veh_LPS_vs_GW_Veh_PBS	Padj < 0.05 + FC	132	11	143	620	0	620	38	3	41
	GW_Veh_LPS_vs_GW_Veh_PBS	Padj < 0.05, no FC	172	27	199	636	29	665	42	5	47
	GW_Veh_LPS_vs_GW_Veh_PBS	P < 0.05 + FC	457	374	831	730	0	730	45	4	49
	GW_Veh_LPS_vs_GW_Veh_PBS	P < 0.05, no FC	1138	1035	2173	1158	15	1173	55	4	59
CBD treatment effects
Condition	Comparison	DEG threshold type	Up-DEG number	Down-DEG number	Total DEG number	Up-GO terms number	Down-GO terms number	Total GO terms number	Up-KEGG terms number	Down-KEGG terms number	Total KEGG terms number
Basal	GW_CBD_PBS_vs_GW_Veh_PBS	Padj < 0.05 + FC	0	0	0	0	0	0	0	0	0
	GW_CBD_PBS_vs_GW_Veh_PBS	Padj < 0.05, no FC	0	0	0	0	0	0	0	0	0
	GW_CBD_PBS_vs_GW_Veh_PBS	P < 0.05 + FC	201	121	322	0	0	0	0	2	2
	GW_CBD_PBS_vs_GW_Veh_PBS	P < 0.05, no FC	679	611	1290	1	17	18	1	12	13
Immune-stimulated	GW_CBD_LPS_vs_GW_Veh_LPS	Padj < 0.05 + FC	0	36	36	0	173	173	0	28	28
	GW_CBD_LPS_vs_GW_Veh_LPS	Padj < 0.05, no FC	1	43	44	133	197	330	3	25	28
	GW_CBD_LPS_vs_GW_Veh_LPS	P < 0.05 + FC	275	375	650	7	410	417	4	36	40
	GW_CBD_LPS_vs_GW_Veh_LPS	P < 0.05, no FC	728	877	1605	6	613	619	7	45	52
Condition	Comparison	DEG threshold type	Up-DEG number	Down-DEG number	Total DEG number	Up-GO terms number	Down-GO terms number	Total GO terms number	Up-KEGG terms number	Down-KEGG terms number
DeltaLPS	delta_LPS_response_CBD_minus_Veh_in GW	Padj < 0.05 + FC	0	3	3	0	99	99	0	1	1
	delta_LPS_response_CBD_minus_Veh_in GW	Padj < 0.05, no FC	0	3	3	0	99	99	0	1	1
	delta_LPS_response_CBD_minus_Veh_in GW	P < 0.05 + FC	226	364	590	0	465	465	2	34	36
	delta_LPS_response_CBD_minus_Veh_in GW	P < 0.05, no FC	580	615	1195	16	395	411	2	31	33
