# Supplementary material
Source: Research Square preprint supplement (doi:10.21203/rs.3.rs-10072088/v1)
Supplement: Supplementary file 6 [file 72cfed730aa82da9befa9306.xlsx]

## Sheet: GO-BP_UpDEG_by_LPS
Ctrl mice: Brain-wide Up-DEGs by LPS							GWI mice: Brain-wide Up-DEGs by LPS
ID	Description	FoldEnrichment	pvalue	p.adjust	geneID		ID	Description	FoldEnrichment	pvalue	p.adjust	geneID
GO:0098883	synapse pruning	78.6636	3.84518e-09	4.97567e-06	C1qb/C1qa/C1qc/Cx3cr1/Itgam		GO:0002443	leukocyte mediated immunity	12.0739	1.05144e-26	2.71062e-23	C1qb/C1qa/Fcgr3/C1qc/Itgb2/Ctsc/Icam1/Fcgr1/Tyrobp/Cx3cr1/Myo1f/Fcgr2b/Ctsh/Itgam/Csf2rb/Lgals9/Fcer1g/Spi1/Nckap1l/Lyn/Ncf1/Rac2/Tgfb1/Plcg2/Fcgr4/Irf7/Ptprc/H2-K1/Myo1g/Icosl/Rsad2/Rigi/Ptpn6
GO:0021889	olfactory bulb interneuron differentiation	85.4062	1.0848e-07	5.15193e-05	Sall1/Dlx5/Sall3/Arx		GO:0050900	leukocyte migration	10.0975	8.26319e-20	1.06513e-16	Fcgr3/Itgb2/Csf1r/Selplg/Icam1/Cx3cr1/Myo1f/Itgam/Csf3r/Lgals9/Fcer1g/Dock8/Spi1/Nckap1l/Lyn/Apod/Rac2/Pecam1/Selp/C3ar1/Tgfb1/C5ar1/F11r/Ccl12/Sele/Myo1g/Pycard
GO:0150146	cell junction disassembly	41.5169	1.19442e-07	5.15193e-05	C1qb/C1qa/C1qc/Cx3cr1/Itgam		GO:0002449	lymphocyte mediated immunity	11.4206	3.76638e-18	3.23658e-15	C1qb/C1qa/Fcgr3/C1qc/Ctsc/Icam1/Fcgr1/Tyrobp/Fcgr2b/Ctsh/Csf2rb/Lgals9/Fcer1g/Nckap1l/Tgfb1/Fcgr4/Irf7/Ptprc/H2-K1/Myo1g/Icosl/Rsad2/Ptpn6
GO:0021772	olfactory bulb development	36.4538	2.34462e-07	7.58483e-05	Csf1r/Sall1/Dlx5/Sall3/Arx		GO:0001906	cell killing	14.5004	6.07693e-18	3.91658e-15	Fcgr3/Pglyrp1/Ctsc/Fcgr1/Tyrobp/Cx3cr1/Fcgr2b/Ctsh/Itgam/Ccr5/Lgals9/Cfh/Spi1/Nckap1l/Ncf1/Tgfb1/Fcgr4/Ptprc/H2-K1/Ptpn6
GO:0021988	olfactory lobe development	33.9684	3.3722e-07	8.72724e-05	Csf1r/Sall1/Dlx5/Sall3/Arx		GO:0002366	leukocyte activation involved in immune response	10.6176	1.93113e-17	8.8259e-15	Itgb2/Pglyrp1/Icam1/Tyrobp/Cx3cr1/Myo1f/Itgam/Lgals9/Fcer1g/Spi1/Lcp1/Nckap1l/Lyn/Rac2/Dock2/Tgfb1/Lfng/Plcg2/Fcgr4/Ptprc/Icosl/Pycard/Ptpn6
GO:0021879	forebrain neuron differentiation	18.8793	7.1713e-07	0.000154661	Csf1r/Sall1/Dlx5/Sall3/Dlx1/Arx		GO:0001909	leukocyte mediated cytotoxicity	18.9531	2.05413e-17	8.8259e-15	Fcgr3/Ctsc/Fcgr1/Tyrobp/Cx3cr1/Fcgr2b/Ctsh/Itgam/Lgals9/Spi1/Nckap1l/Ncf1/Tgfb1/Fcgr4/Ptprc/H2-K1/Ptpn6
GO:0021872	forebrain generation of neurons	17.2455	1.2238e-06	0.000226228	Csf1r/Sall1/Dlx5/Sall3/Dlx1/Arx		GO:0002263	cell activation involved in immune response	10.4542	2.72849e-17	1.00486e-14	Itgb2/Pglyrp1/Icam1/Tyrobp/Cx3cr1/Myo1f/Itgam/Lgals9/Fcer1g/Spi1/Lcp1/Nckap1l/Lyn/Rac2/Dock2/Tgfb1/Lfng/Plcg2/Fcgr4/Ptprc/Icosl/Pycard/Ptpn6
GO:0045453	bone resorption	22.3076	2.83019e-06	0.000457784	Tmem119/Csf1r/Inpp5d/Ctss/Cartpt		GO:0002697	regulation of immune effector process	8.79303	6.12158e-17	1.97268e-14	Fcgr3/Itgb2/Pglyrp1/Fcgr1/Tyrobp/Cx3cr1/Fcgr2b/Itgam/Laptm5/Lgals9/Cfh/Fcer1g/Spi1/Nckap1l/Lyn/Ncf1/Rac2/Tgfb1/Plcg2/Ptprc/H2-K1/Rsad2/Pycard/Rigi/Ptpn6
GO:1903706	regulation of hemopoiesis	7.13606	3.819e-06	0.000549087	C1qc/Csf1r/Inpp5d/Tmem176b/Meis2/Itgam/Tmem176a/Cartpt/Nfam1		GO:0002764	immune response-regulating signaling pathway	7.24068	1.04775e-16	3.00122e-14	Fcgr3/Fcgr1/Tyrobp/Fcgr2b/Ctsh/Itgam/Laptm5/Fcer1g/Nckap1l/Lyn/C3ar1/C5ar1/Plcg2/Fcgr4/Tlr13/Irf7/Pik3ap1/Ptprc/Trim30a/Myo1g/Icosl/Rsad2/Cd53/Pycard/Rigi/Fyb1/Nfam1/Ptpn6
GO:1902105	regulation of leukocyte differentiation	7.9979	6.10225e-06	0.000753846	C1qc/Csf1r/Inpp5d/Tmem176b/Itgam/Tmem176a/Cartpt/Nfam1		GO:0002274	myeloid leukocyte activation	11.3841	1.31218e-16	3.3828e-14	C1qa/Fcgr3/Itgb2/Csf1r/Ctsc/Tyrobp/Cx3cr1/Myo1f/Itgam/Lgals9/Fcer1g/Spi1/Lyn/Rac2/Dock2/Tgfb1/C5ar1/Plcg2/Fcgr4/Pycard/Ptpn6
GO:0045638	negative regulation of myeloid cell differentiation	18.9191	6.40828e-06	0.000753846	C1qc/Csf1r/Inpp5d/Meis2/Cartpt		GO:0002250	adaptive immune response	8.29904	2.39477e-16	5.61247e-14	C1qb/C1qa/Fcgr3/C1qc/Ctsc/Icam1/Fcgr1/Cx3cr1/Fcgr2b/Ctsh/Csf2rb/Fcer1g/Nckap1l/Lyn/C3ar1/Tgfb1/Fcgr4/Irf7/Ptprc/H2-K1/Myo1g/Icosl/Rsad2/Pycard/Ptpn6
GO:0045779	negative regulation of bone resorption	68.9819	9.85237e-06	0.00102201	Tmem119/Inpp5d/Cartpt		GO:0006909	phagocytosis	11.6432	4.76058e-16	1.02273e-13	Fcgr3/Itgb2/Fcgr1/Tyrobp/Fcgr2b/Itgam/Bin2/Pld4/Fcer1g/Nckap1l/Mertk/Dock2/Pecam1/Hck/Tgfb1/Plcg2/Ptprc/Ncf2/Myo1g/Pycard
GO:0045124	regulation of bone resorption	29.1631	1.02675e-05	0.00102201	Tmem119/Csf1r/Inpp5d/Cartpt		GO:0002460	adaptive immune response based on somatic recombination of immune receptors built from immunoglobulin superfamily domains	9.59381	8.83086e-16	1.75123e-13	C1qb/C1qa/Fcgr3/C1qc/Ctsc/Icam1/Fcgr1/Fcgr2b/Ctsh/Csf2rb/Fcer1g/Nckap1l/C3ar1/Tgfb1/Fcgr4/Irf7/Ptprc/H2-K1/Myo1g/Icosl/Rsad2/Ptpn6
GO:0046849	bone remodeling	16.0711	1.42662e-05	0.0013186	Tmem119/Csf1r/Inpp5d/Ctss/Cartpt		GO:0002703	regulation of leukocyte mediated immunity	11.2017	1.0136e-15	1.86646e-13	Fcgr3/Itgb2/Fcgr1/Tyrobp/Cx3cr1/Fcgr2b/Itgam/Lgals9/Fcer1g/Spi1/Nckap1l/Lyn/Rac2/Tgfb1/Plcg2/Ptprc/H2-K1/Rsad2/Rigi/Ptpn6
GO:0046851	negative regulation of bone remodeling	59.7843	1.56004e-05	0.00132167	Tmem119/Inpp5d/Cartpt		GO:0002687	positive regulation of leukocyte migration	14.9928	1.22076e-15	2.09808e-13	Csf1r/Icam1/Cx3cr1/Myo1f/Lgals9/Dock8/Spi1/Nckap1l/Rac2/Pecam1/Selp/C3ar1/Tgfb1/C5ar1/Ccl12/Sele/Pycard
GO:0001774	microglial cell activation	25.9932	1.63422e-05	0.00132167	C1qa/Csf1r/Cx3cr1/Itgam		GO:0002768	immune response-regulating cell surface receptor signaling pathway	9.92698	2.13141e-15	3.43423e-13	Fcgr3/Fcgr1/Tyrobp/Fcgr2b/Itgam/Laptm5/Fcer1g/Nckap1l/Lyn/C3ar1/C5ar1/Plcg2/Fcgr4/Pik3ap1/Ptprc/Myo1g/Icosl/Cd53/Fyb1/Nfam1/Ptpn6
GO:1902106	negative regulation of leukocyte differentiation	15.2511	1.84087e-05	0.00140123	C1qc/Inpp5d/Tmem176b/Tmem176a/Cartpt		GO:0002444	myeloid leukocyte mediated immunity	18.4654	2.60608e-15	3.95204e-13	Fcgr3/Itgb2/Fcgr1/Tyrobp/Cx3cr1/Myo1f/Fcgr2b/Itgam/Fcer1g/Spi1/Lyn/Ncf1/Rac2/Fcgr4/Rigi
GO:0042116	macrophage activation	14.9461	2.0306e-05	0.00145977	C1qa/Csf1r/Cx3cr1/Itgam/Ticam1		GO:0002685	regulation of leukocyte migration	11.3979	4.04747e-15	5.79687e-13	Csf1r/Icam1/Cx3cr1/Myo1f/Lgals9/Dock8/Spi1/Nckap1l/Lyn/Apod/Rac2/Pecam1/Selp/C3ar1/Tgfb1/C5ar1/Ccl12/Sele/Pycard
GO:0002269	leukocyte activation involved in inflammatory response	23.9137	2.28371e-05	0.00147756	C1qa/Csf1r/Cx3cr1/Itgam		GO:0002253	activation of immune response	6.43309	7.40606e-15	1.00489e-12	C1qb/C1qa/C1qc/Tyrobp/Itgam/Laptm5/Cfh/Fcer1g/Nckap1l/Lyn/C3ar1/C5ar1/Plcg2/Tlr13/Irf7/Pik3ap1/Ptprc/Trim30a/Myo1g/Icosl/Rsad2/Cd53/Pycard/Rigi/Fyb1/Nfam1/Ptpn6
GO:0046850	regulation of bone remodeling	23.9137	2.28371e-05	0.00147756	Tmem119/Csf1r/Inpp5d/Cartpt		GO:0016064	immunoglobulin mediated immune response	15.7571	2.2499e-13	2.90012e-11	C1qb/C1qa/Fcgr3/C1qc/Fcgr1/Fcgr2b/Csf2rb/Fcer1g/Tgfb1/Fcgr4/Irf7/Ptprc/Icosl/Ptpn6
GO:1903707	negative regulation of hemopoiesis	14.3712	2.45553e-05	0.00151307	C1qc/Inpp5d/Tmem176b/Tmem176a/Cartpt		GO:0002275	myeloid cell activation involved in immune response	17.8642	3.1786e-13	3.90211e-11	Itgb2/Tyrobp/Cx3cr1/Myo1f/Itgam/Fcer1g/Spi1/Lyn/Rac2/Dock2/Plcg2/Pycard/Ptpn6
GO:0061900	glial cell activation	22.1423	3.10527e-05	0.00182646	C1qa/Csf1r/Cx3cr1/Itgam		GO:0019724	B cell mediated immunity	15.3194	3.35459e-13	3.93097e-11	C1qb/C1qa/Fcgr3/C1qc/Fcgr1/Fcgr2b/Csf2rb/Fcer1g/Tgfb1/Fcgr4/Irf7/Ptprc/Icosl/Ptpn6
GO:0045637	regulation of myeloid cell differentiation	9.245	4.39651e-05	0.00233449	C1qc/Csf1r/Inpp5d/Meis2/Itgam/Cartpt		GO:0002886	regulation of myeloid leukocyte mediated immunity	24.0734	7.26387e-13	8.14186e-11	Fcgr3/Itgb2/Fcgr1/Tyrobp/Cx3cr1/Itgam/Fcer1g/Spi1/Lyn/Rac2/Rigi
GO:0097154	GABAergic neuron differentiation	42.7031	4.49596e-05	0.00233449	Sall1/Dlx1/Arx		GO:0032640	tumor necrosis factor production	11.2551	8.35218e-13	8.61277e-11	Fcgr3/Csf1r/Fcgr1/Tyrobp/Cx3cr1/Fcgr2b/Ccr5/Lgals9/Fcer1g/Tgfb1/Plcg2/Ptprc/Trim30a/Pycard/Rigi/Ptpn6
GO:0002761	regulation of myeloid leukocyte differentiation	12.6662	4.51023e-05	0.00233449	C1qc/Csf1r/Inpp5d/Itgam/Cartpt		GO:0032680	regulation of tumor necrosis factor production	11.2551	8.35218e-13	8.61277e-11	Fcgr3/Csf1r/Fcgr1/Tyrobp/Cx3cr1/Fcgr2b/Ccr5/Lgals9/Fcer1g/Tgfb1/Plcg2/Ptprc/Trim30a/Pycard/Rigi/Ptpn6
GO:0034104	negative regulation of tissue remodeling	38.9898	5.95853e-05	0.00296552	Tmem119/Inpp5d/Cartpt		GO:0071706	tumor necrosis factor superfamily cytokine production	11.1227	1.00416e-12	9.58786e-11	Fcgr3/Csf1r/Fcgr1/Tyrobp/Cx3cr1/Fcgr2b/Ccr5/Lgals9/Fcer1g/Tgfb1/Plcg2/Ptprc/Trim30a/Pycard/Rigi/Ptpn6
GO:0021537	telencephalon development	6.90578	6.2538e-05	0.00299719	Csf1r/Sall1/Dlx5/Sall3/Cx3cr1/Dlx1/Arx		GO:1903555	regulation of tumor necrosis factor superfamily cytokine production	11.1227	1.00416e-12	9.58786e-11	Fcgr3/Csf1r/Fcgr1/Tyrobp/Cx3cr1/Fcgr2b/Ccr5/Lgals9/Fcer1g/Tgfb1/Plcg2/Ptprc/Trim30a/Pycard/Rigi/Ptpn6
GO:0006958	complement activation, classical pathway	37.3652	6.7937e-05	0.00313966	C1qb/C1qa/C1qc		GO:0070661	leukocyte proliferation	7.67392	1.34829e-12	1.21544e-10	Itgb2/Csf1r/Tyrobp/Fcgr2b/Itgam/Csf2rb/Laptm5/Lgals9/Dock8/Nckap1l/Lyn/Cdkn1a/Rac2/Dock2/Tgfb1/Ccl12/Ptprc/Icosl/Pycard/Ptpn6
GO:0034103	regulation of tissue remodeling	17.0812	8.65511e-05	0.00386197	Tmem119/Csf1r/Inpp5d/Cartpt		GO:0007159	leukocyte cell-cell adhesion	7.152	1.36725e-12	1.21544e-10	Itgb2/Selplg/Icam1/Cx3cr1/Itgam/Laptm5/Lgals9/Cfh/Tnfaip8l2/Dock8/Nckap1l/Rac2/Pecam1/Selp/Tgfb1/F11r/Ptprc/Sele/Icosl/Pycard/Ptpn6
GO:0002443	leukocyte mediated immunity	6.47818	9.33866e-05	0.00402807	C1qb/C1qa/C1qc/Inpp5d/Cx3cr1/Itgam/Ticam1		GO:0071674	mononuclear cell migration	10.8049	1.57488e-12	1.35334e-10	Csf1r/Icam1/Cx3cr1/Lgals9/Dock8/Spi1/Lyn/Apod/Pecam1/C3ar1/Tgfb1/C5ar1/F11r/Ccl12/Myo1g/Pycard
GO:0030900	forebrain development	5.42261	9.83218e-05	0.00410414	Csf1r/Sall1/Dlx5/Sall3/Cx3cr1/Itgam/Dlx1/Arx		GO:0002757	immune response-activating signaling pathway	6.19157	2.08789e-12	1.73631e-10	Tyrobp/Itgam/Laptm5/Fcer1g/Nckap1l/Lyn/C3ar1/C5ar1/Plcg2/Tlr13/Irf7/Pik3ap1/Ptprc/Trim30a/Myo1g/Icosl/Rsad2/Cd53/Pycard/Rigi/Fyb1/Nfam1/Ptpn6
GO:1903131	mononuclear cell differentiation	5.09888	0.000150426	0.00608287	C1qc/Csf1r/Laptm5/Inpp5d/Tmem176b/Itgam/Tmem176a/Nfam1		GO:0002888	positive regulation of myeloid leukocyte mediated immunity	47.2713	2.44177e-12	1.9658e-10	Fcgr3/Itgb2/Fcgr1/Tyrobp/Itgam/Fcer1g/Spi1/Rigi
GO:0150076	neuroinflammatory response	14.5815	0.000160299	0.00619931	C1qa/Csf1r/Cx3cr1/Itgam		GO:0001819	positive regulation of cytokine production	6.13567	2.51634e-12	1.9658e-10	Fcgr3/Csf1r/Fcgr1/Tyrobp/Fcgr2b/Ccr5/Laptm5/Lgals9/Fcer1g/Naip5/C3ar1/Tgfb1/C5ar1/Plcg2/Irf7/Ptprc/Icosl/Rsad2/Pycard/Ucn/Rigi/Nfam1/Ptpn6
GO:0043583	ear development	7.29077	0.000162888	0.00619931	C1qb/Dlx5/Igfbp7/Fzd2/Tshz1/Lgr5		GO:0032760	positive regulation of tumor necrosis factor production	14.9157	3.46407e-12	2.62658e-10	Fcgr3/Csf1r/Fcgr1/Tyrobp/Fcgr2b/Ccr5/Lgals9/Fcer1g/Tgfb1/Plcg2/Ptprc/Pycard/Rigi
GO:0002455	humoral immune response mediated by circulating immunoglobulin	25.6218	0.000214062	0.00780308	C1qb/C1qa/C1qc		GO:1903557	positive regulation of tumor necrosis factor superfamily cytokine production	14.7723	3.93088e-12	2.89537e-10	Fcgr3/Csf1r/Fcgr1/Tyrobp/Fcgr2b/Ccr5/Lgals9/Fcer1g/Tgfb1/Plcg2/Ptprc/Pycard/Rigi
GO:0001894	tissue homeostasis	6.87176	0.000224468	0.00780308	Tmem119/Csf1r/Inpp5d/Ctss/Cdhr1/Cartpt		GO:0097529	myeloid leukocyte migration	9.95186	5.59376e-12	4.00575e-10	Fcgr3/Itgb2/Csf1r/Cx3cr1/Myo1f/Itgam/Csf3r/Fcer1g/Spi1/Nckap1l/Lyn/Rac2/Pecam1/C3ar1/C5ar1/Ccl12
GO:0060249	anatomical structure homeostasis	6.87176	0.000224468	0.00780308	Tmem119/Csf1r/Inpp5d/Ctss/Cdhr1/Cartpt		GO:1903131	mononuclear cell differentiation	5.79552	8.08e-12	5.62979e-10	C1qc/Csf1r/Pglyrp1/Itgam/Laptm5/Lgals9/Fcer1g/Spi1/Nckap1l/Mertk/Lyn/Tmem176a/Hcls1/Dock2/Tgfb1/Lfng/Ucp2/Plcg2/Ptprc/Icosl/Rsad2/Nfam1/Ptpn6
GO:0021953	central nervous system neuron differentiation	6.84553	0.000229148	0.00780308	Csf1r/Sall1/Dlx5/Sall3/Dlx1/Arx		GO:0046651	lymphocyte proliferation	7.90784	1.19075e-11	8.07828e-10	Itgb2/Csf1r/Tyrobp/Fcgr2b/Itgam/Laptm5/Lgals9/Dock8/Nckap1l/Lyn/Cdkn1a/Rac2/Dock2/Tgfb1/Ptprc/Icosl/Pycard/Ptpn6
GO:0006956	complement activation	24.2369	0.000252933	0.00839218	C1qb/C1qa/C1qc		GO:0031349	positive regulation of defense response	5.65094	1.34932e-11	8.91932e-10	Ctss/Fcgr3/Csf1r/Ctsc/Fcgr1/Tyrobp/Ccr5/Lgals9/Fcer1g/Spi1/Lyn/Tgfb1/Mmrn2/Plcg2/Tlr13/Irf7/Pik3ap1/Trim30a/Rsad2/Pycard/Ucn/Rigi/Ptpn6
GO:0010721	negative regulation of cell development	6.49829	0.000303133	0.00980636	C1qc/Inpp5d/Tmem176b/Tmem176a/Cartpt/Dlx1		GO:0032635	interleukin-6 production	11.6514	1.51225e-11	9.50871e-10	Tyrobp/Ccr5/Laptm5/Lgals9/Fcer1g/Nckap1l/Prg4/Tgfb1/Plcg2/Trim30a/Pycard/Ucn/Rigi/Ptpn6
GO:0051385	response to mineralocorticoid	20.855	0.000396093	0.0125011	Sgk1/Trh/Cartpt		GO:0032675	regulation of interleukin-6 production	11.6514	1.51225e-11	9.50871e-10	Tyrobp/Ccr5/Laptm5/Lgals9/Fcer1g/Nckap1l/Prg4/Tgfb1/Plcg2/Trim30a/Pycard/Ucn/Rigi/Ptpn6
GO:0016064	immunoglobulin mediated immune response	11.3875	0.000414016	0.0127556	C1qb/C1qa/C1qc/Inpp5d		GO:0097530	granulocyte migration	13.2441	1.62345e-11	9.87443e-10	Fcgr3/Itgb2/Csf1r/Myo1f/Itgam/Csf3r/Fcer1g/Nckap1l/Rac2/Pecam1/C3ar1/C5ar1/Ccl12
GO:0061756	leukocyte adhesion to vascular endothelial cell	19.9281	0.000453298	0.01355	Selplg/Cx3cr1/Itgam		GO:0002429	immune response-activating cell surface receptor signaling pathway	8.44131	1.64701e-11	9.87443e-10	Tyrobp/Itgam/Laptm5/Fcer1g/Nckap1l/Lyn/C3ar1/C5ar1/Plcg2/Pik3ap1/Ptprc/Myo1g/Icosl/Cd53/Fyb1/Nfam1/Ptpn6
GO:0019724	B cell mediated immunity	11.0712	0.000460743	0.01355	C1qb/C1qa/C1qc/Inpp5d		GO:0032943	mononuclear cell proliferation	7.73531	1.72049e-11	1.00805e-09	Itgb2/Csf1r/Tyrobp/Fcgr2b/Itgam/Laptm5/Lgals9/Dock8/Nckap1l/Lyn/Cdkn1a/Rac2/Dock2/Tgfb1/Ptprc/Icosl/Pycard/Ptpn6
GO:0048771	tissue remodeling	7.66466	0.000474059	0.0136318	Tmem119/Csf1r/Inpp5d/Ctss/Cartpt		GO:0002526	acute inflammatory response	17.8077	2.35827e-11	1.35103e-09	Fcgr3/Icam1/Fcgr1/Fcgr2b/Ccr5/Fcer1g/Vwf/Lcn2/Serpina3n/Saa3/Fcgr4
GO:0002762	negative regulation of myeloid leukocyte differentiation	19.0801	0.000515554	0.0145027	C1qc/Inpp5d/Cartpt		GO:0050727	regulation of inflammatory response	6.88769	3.39337e-11	1.90176e-09	Ctss/Fcgr3/Csf1r/Pglyrp1/Ctsc/Fcgr1/Cx3cr1/Fcgr2b/Ccr5/Lgals9/Fcer1g/Tnfaip8l2/Lyn/Ncf1/Tgfb1/Plcg2/Pik3ap1/Pycard/Ptpn6
GO:0022411	cellular component disassembly	4.87751	0.000528564	0.0145524	C1qb/C1qa/C1qc/Sgk1/Cx3cr1/Ctss/Itgam		GO:0060326	cell chemotaxis	8.03612	3.59502e-11	1.9719e-09	Fcgr3/Itgb2/Csf1r/Cx3cr1/Itgam/Bin2/Ccr5/Csf3r/Fcer1g/Spi1/Nckap1l/Lyn/Rac2/C3ar1/C5ar1/Saa3/Ccl12
GO:0016055	Wnt signaling pathway	4.85487	0.00054341	0.0146494	Ptpro/Sall1/Dlx5/Fzd2/Shisa3/Lgr5/Lgr6		GO:0002705	positive regulation of leukocyte mediated immunity	12.3897	3.82396e-11	2.05378e-09	Fcgr3/Itgb2/Fcgr1/Tyrobp/Itgam/Fcer1g/Spi1/Tgfb1/Plcg2/Ptprc/H2-K1/Rsad2/Rigi
GO:0030111	regulation of Wnt signaling pathway	5.74849	0.0005811	0.0153458	Ptpro/Sall1/Dlx5/Shisa3/Lgr5/Lgr6		GO:0006935	chemotaxis	6.35367	4.2133e-11	2.21671e-09	Fcgr3/Itgb2/Csf1r/Cx3cr1/Itgam/Bin2/Ccr5/Csf3r/Lgals9/Fcer1g/Spi1/Nckap1l/Lyn/Rac2/Dock2/C3ar1/Tgfb1/C5ar1/Saa3/Ccl12
GO:0042755	eating behavior	17.5836	0.000655925	0.0169753	Trh/Th/Cartpt		GO:0050764	regulation of phagocytosis	14.1814	4.48284e-11	2.31135e-09	Fcgr3/Fcgr1/Fcgr2b/Fcer1g/Nckap1l/Mertk/Dock2/Hck/Tgfb1/Plcg2/Ptprc/Pycard
GO:0021892	cerebral cortex GABAergic interneuron differentiation	49.8203	0.000708843	0.0179851	Dlx1/Arx		GO:0042330	taxis	6.31969	4.6386e-11	2.34477e-09	Fcgr3/Itgb2/Csf1r/Cx3cr1/Itgam/Bin2/Ccr5/Csf3r/Lgals9/Fcer1g/Spi1/Nckap1l/Lyn/Rac2/Dock2/C3ar1/Tgfb1/C5ar1/Saa3/Ccl12
GO:0050864	regulation of B cell activation	9.80071	0.000729624	0.0180231	Laptm5/Inpp5d/Ticam1/Nfam1		GO:0002699	positive regulation of immune effector process	8.51735	5.92778e-11	2.93881e-09	Fcgr3/Itgb2/Fcgr1/Tyrobp/Itgam/Laptm5/Fcer1g/Spi1/Tgfb1/Plcg2/Ptprc/H2-K1/Rsad2/Pycard/Rigi/Ptpn6
GO:0048839	inner ear development	6.95166	0.000738195	0.0180231	C1qb/Dlx5/Igfbp7/Fzd2/Lgr5		GO:0031341	regulation of cell killing	15.8532	8.70295e-11	4.21862e-09	Tyrobp/Cx3cr1/Itgam/Ccr5/Lgals9/Cfh/Spi1/Nckap1l/Tgfb1/Ptprc/H2-K1
GO:0002886	regulation of myeloid leukocyte mediated immunity	16.6068	0.000775758	0.0184862	Cx3cr1/Itgam/Ticam1		GO:0070663	regulation of leukocyte proliferation	8.29321	8.83653e-11	4.21862e-09	Csf1r/Tyrobp/Fcgr2b/Csf2rb/Laptm5/Lgals9/Nckap1l/Lyn/Cdkn1a/Rac2/Tgfb1/Ccl12/Ptprc/Icosl/Pycard/Ptpn6
GO:0002274	myeloid leukocyte activation	6.856	0.000785736	0.0184862	C1qa/Csf1r/Cx3cr1/Itgam/Ticam1		GO:0006911	phagocytosis, engulfment	21.7062	2.59052e-10	1.21425e-08	Fcgr3/Itgb2/Fcgr1/Fcgr2b/Itgam/Bin2/Fcer1g/Nckap1l/Plcg2
GO:0002683	negative regulation of immune system process	4.45202	0.000906075	0.0209368	C1qc/Laptm5/Inpp5d/Tmem176b/Cx3cr1/Tmem176a/Cartpt		GO:0071621	granulocyte chemotaxis	14.2853	2.75857e-10	1.24765e-08	Fcgr3/Itgb2/Csf1r/Itgam/Csf3r/Fcer1g/Nckap1l/Rac2/C3ar1/C5ar1/Ccl12
GO:0002573	myeloid leukocyte differentiation	6.41463	0.00105863	0.0240329	C1qc/Csf1r/Inpp5d/Itgam/Cartpt		GO:1990266	neutrophil migration	14.2853	2.75857e-10	1.24765e-08	Fcgr3/Itgb2/Myo1f/Itgam/Csf3r/Fcer1g/Nckap1l/Rac2/Pecam1/C3ar1/C5ar1
GO:0010832	negative regulation of myotube differentiation	39.8562	0.00112049	0.0245747	Tmem119/Csf1r		GO:0030595	leukocyte chemotaxis	9.34744	2.94902e-10	1.31079e-08	Fcgr3/Itgb2/Csf1r/Cx3cr1/Itgam/Csf3r/Fcer1g/Spi1/Nckap1l/Lyn/Rac2/C3ar1/C5ar1/Ccl12
GO:0030852	regulation of granulocyte differentiation	39.8562	0.00112049	0.0245747	C1qc/Inpp5d		GO:0043299	leukocyte degranulation	16.6448	3.94602e-10	1.69547e-08	Itgb2/Myo1f/Itgam/Lgals9/Fcer1g/Spi1/Nckap1l/Lyn/Rac2/Fcgr4
GO:0030225	macrophage differentiation	14.4639	0.0011608	0.0246243	C1qc/Csf1r/Itgam		GO:0050766	positive regulation of phagocytosis	16.6448	3.94602e-10	1.69547e-08	Fcgr3/Fcgr1/Fcgr2b/Fcer1g/Nckap1l/Mertk/Dock2/Plcg2/Ptprc/Pycard
GO:0045123	cellular extravasation	14.4639	0.0011608	0.0246243	Selplg/Cx3cr1/Itgam		GO:0002683	negative regulation of immune system process	5.28031	4.02322e-10	1.70031e-08	C1qc/Pglyrp1/Tyrobp/Cx3cr1/Fcgr2b/Laptm5/Lgals9/Fcer1g/Tnfaip8l2/Spi1/Nckap1l/Mertk/Lyn/Tmem176a/Apod/Tgfb1/Pik3ap1/Ptprc/Trim30a/Parp14/Ptpn6
GO:0002253	activation of immune response	4.21865	0.00123923	0.0258359	C1qb/C1qa/C1qc/Laptm5/Itgam/Ticam1/Nfam1		GO:0042119	neutrophil activation	27.0122	4.10248e-10	1.70584e-08	Itgb2/Tyrobp/Myo1f/Itgam/Fcer1g/Spi1/Fcgr4/Ptpn6
GO:0002281	macrophage activation involved in immune response	37.3652	0.00127782	0.0258359	Cx3cr1/Ticam1		GO:0002285	lymphocyte activation involved in immune response	9.09064	4.26663e-10	1.74593e-08	Pglyrp1/Icam1/Tyrobp/Lgals9/Fcer1g/Spi1/Lcp1/Nckap1l/Tgfb1/Lfng/Plcg2/Fcgr4/Ptprc/Icosl
GO:2000288	positive regulation of myoblast proliferation	37.3652	0.00127782	0.0258359	Csf1r/Meis2		GO:0038094	Fc-gamma receptor signaling pathway	54.5438	5.33809e-10	2.15025e-08	Fcgr3/Fcgr1/Fcgr2b/Fcer1g/Fcgr4/Myo1g
GO:0030177	positive regulation of Wnt signaling pathway	8.24611	0.001387	0.0276121	Sall1/Dlx5/Lgr5/Lgr6		GO:0072593	reactive oxygen species metabolic process	8.02115	5.6708e-10	2.24913e-08	Itgb2/Tyrobp/Itgam/Fbln5/Cdkn1a/Ncf1/Rac2/Gpx3/Lcn2/Tgfb1/Nos3/Ucp2/Plcg2/Trim30a/Ncf2
GO:0045670	regulation of osteoclast differentiation	12.9966	0.0015819	0.0310148	Csf1r/Inpp5d/Cartpt		GO:0051249	regulation of lymphocyte activation	5.47122	5.94164e-10	2.32084e-08	Csf1r/Pglyrp1/Tyrobp/Fcgr2b/Laptm5/Lgals9/Tnfaip8l2/Dock8/Spi1/Nckap1l/Mertk/Lyn/Cdkn1a/Rac2/Tgfb1/Ptprc/Icosl/Pycard/Nfam1/Ptpn6
GO:2000252	negative regulation of feeding behavior	33.2135	0.00162227	0.0313315	Trh/Cartpt		GO:0002694	regulation of leukocyte activation	5.02377	9.91119e-10	3.81359e-08	Csf1r/Pglyrp1/Ctsc/Tyrobp/Fcgr2b/Laptm5/Lgals9/Tnfaip8l2/Dock8/Spi1/Nckap1l/Mertk/Lyn/Cdkn1a/Rac2/Tgfb1/Ptprc/Icosl/Pycard/Nfam1/Ptpn6
GO:0001910	regulation of leukocyte mediated cytotoxicity	12.8109	0.00164886	0.0313768	Inpp5d/Cx3cr1/Itgam		GO:0099024	plasma membrane invagination	18.6597	1.07167e-09	4.0629e-08	Fcgr3/Itgb2/Fcgr1/Fcgr2b/Itgam/Bin2/Fcer1g/Nckap1l/Plcg2
GO:0014004	microglia differentiation	31.4654	0.00180925	0.0315313	Csf1r/Itgam		GO:0042110	T cell activation	4.96349	1.23142e-09	4.60086e-08	Itgb2/Icam1/Tyrobp/Itgam/Laptm5/Lgals9/Fcer1g/Tnfaip8l2/Dock8/Spi1/Lcp1/Nckap1l/Rac2/Dock2/Tgfb1/Lfng/Ptprc/Icosl/Rsad2/Pycard/Ptpn6
GO:2000291	regulation of myoblast proliferation	31.4654	0.00180925	0.0315313	Csf1r/Meis2		GO:0002237	response to molecule of bacterial origin	6.33764	1.43159e-09	5.27233e-08	Ly86/Cx3cr1/Fcgr2b/Ccr5/Lgals9/Spi1/Lyn/Lcn2/C5ar1/Nos3/Plcg2/Fcgr4/Trim30a/Ncf2/Hmgcs2/Pycard/Ptpn6
GO:0050890	cognition	4.61062	0.00181346	0.0315313	Sgk1/Cx3cr1/Cbr3/Meis2/Th/Cartpt		GO:0019221	cytokine-mediated signaling pathway	5.51692	1.45483e-09	5.28246e-08	Csf1r/Ifitm3/Cx3cr1/Ccr5/Csf2rb/Csf3r/Laptm5/Fcer1g/Spi1/Lyn/Hcls1/Naip5/Irf7/Ccl12/Ptprc/Parp14/Oasl2/Pycard/Ptpn6
GO:0071772	response to BMP	7.66466	0.0018142	0.0315313	Tmem119/Spint1/Dlx5/Dlx1		GO:0071219	cellular response to molecule of bacterial origin	8.19057	1.67822e-09	6.00895e-08	Ly86/Cx3cr1/Fcgr2b/Ccr5/Spi1/Lyn/Lcn2/Nos3/Plcg2/Fcgr4/Trim30a/Hmgcs2/Pycard/Ptpn6
GO:0071773	cellular response to BMP stimulus	7.66466	0.0018142	0.0315313	Tmem119/Spint1/Dlx5/Dlx1		GO:0042742	defense response to bacterium	8.15023	1.78976e-09	6.23515e-08	Pglyrp1/Fcgr1/Myo1f/Lgals9/Fcer1g/Stab1/Ncf1/Naip5/Hck/Lcn2/C5ar1/Mmrn2/H2-K1/Pycard
GO:0007606	sensory perception of chemical stimulus	12.2844	0.0018603	0.0315313	Fzd2/Omp/Cartpt		GO:0050670	regulation of lymphocyte proliferation	8.15023	1.78976e-09	6.23515e-08	Csf1r/Tyrobp/Fcgr2b/Laptm5/Lgals9/Nckap1l/Lyn/Cdkn1a/Rac2/Tgfb1/Ptprc/Icosl/Pycard/Ptpn6
GO:0046530	photoreceptor cell differentiation	12.2844	0.0018603	0.0315313	Cdhr1/Th/Dlx1		GO:0036230	granulocyte activation	22.5102	1.95792e-09	6.73003e-08	Itgb2/Tyrobp/Myo1f/Itgam/Fcer1g/Spi1/Fcgr4/Ptpn6
GO:0042063	gliogenesis	4.58703	0.00186105	0.0315313	C1qa/Csf1r/Spint1/Cx3cr1/Itgam/Dlx1		GO:0032944	regulation of mononuclear cell proliferation	7.99273	2.30687e-09	7.80828e-08	Csf1r/Tyrobp/Fcgr2b/Laptm5/Lgals9/Nckap1l/Lyn/Cdkn1a/Rac2/Tgfb1/Ptprc/Icosl/Pycard/Ptpn6
GO:0035107	appendage morphogenesis	7.56763	0.00190065	0.0315313	Sall1/Dlx5/Sall3/Sp8		GO:0045123	cellular extravasation	17.1549	2.33219e-09	7.80828e-08	Itgb2/Selplg/Icam1/Cx3cr1/Itgam/Pecam1/Selp/F11r/Sele
GO:0035108	limb morphogenesis	7.56763	0.00190065	0.0315313	Sall1/Dlx5/Sall3/Sp8		GO:0043300	regulation of leukocyte degranulation	21.9867	2.38849e-09	7.89425e-08	Itgb2/Itgam/Lgals9/Fcer1g/Spi1/Nckap1l/Lyn/Rac2
GO:0046651	lymphocyte proliferation	5.55616	0.0019957	0.0320462	Csf1r/Laptm5/Inpp5d/Itgam/Ticam1		GO:0038093	Fc receptor signaling pathway	44.3169	2.4398e-09	7.96178e-08	Fcgr3/Fcgr1/Fcgr2b/Fcer1g/Fcgr4/Myo1g
GO:0002888	positive regulation of myeloid leukocyte mediated immunity	29.8922	0.00200599	0.0320462	Itgam/Ticam1		GO:0071675	regulation of mononuclear cell migration	11.304	3.49504e-09	1.11737e-07	Csf1r/Cx3cr1/Lgals9/Dock8/Spi1/Lyn/Apod/C3ar1/Tgfb1/C5ar1/Pycard
GO:0048143	astrocyte activation	29.8922	0.00200599	0.0320462	C1qa/Csf1r		GO:0002478	antigen processing and presentation of exogenous peptide antigen	28.5258	3.52475e-09	1.11737e-07	Ctss/Fcgr3/Fcgr1/Fcgr2b/Ifi30/Fcer1g/H2-K1
GO:0032943	mononuclear cell proliferation	5.43494	0.00219701	0.0346698	Csf1r/Laptm5/Inpp5d/Itgam/Ticam1		GO:0006801	superoxide metabolic process	16.3631	3.59743e-09	1.11737e-07	Itgb2/Tyrobp/Itgam/Fbln5/Ncf1/Rac2/Tgfb1/Nos3/Ncf2
GO:0150063	visual system development	4.35323	0.0024202	0.0365398	C1qa/Meis2/Th/Itgam/Dlx1/Crybb1		GO:0010324	membrane invagination	16.3631	3.59743e-09	1.11737e-07	Fcgr3/Itgb2/Fcgr1/Fcgr2b/Itgam/Bin2/Fcer1g/Nckap1l/Plcg2
GO:0001911	negative regulation of leukocyte mediated cytotoxicity	27.1747	0.00242846	0.0365398	Inpp5d/Cx3cr1		GO:0032755	positive regulation of interleukin-6 production	12.8455	5.30586e-09	1.62839e-07	Tyrobp/Ccr5/Laptm5/Lgals9/Fcer1g/Tgfb1/Plcg2/Pycard/Ucn/Rigi
GO:0062009	secondary palate development	27.1747	0.00242846	0.0365398	Fzd2/Tshz1		GO:0002283	neutrophil activation involved in immune response	39.3928	5.57798e-09	1.69177e-07	Itgb2/Tyrobp/Myo1f/Itgam/Fcer1g/Spi1
GO:1905523	positive regulation of macrophage migration	27.1747	0.00242846	0.0365398	Csf1r/Cx3cr1		GO:0030593	neutrophil chemotaxis	15.4146	6.19891e-09	1.85823e-07	Fcgr3/Itgb2/Itgam/Csf3r/Fcer1g/Nckap1l/Rac2/C3ar1/C5ar1
GO:0006576	biogenic amine metabolic process	10.9362	0.00259352	0.0378457	Trh/Th/Itgam		GO:0050864	regulation of B cell activation	10.6554	6.55734e-09	1.94308e-07	Tyrobp/Fcgr2b/Laptm5/Spi1/Nckap1l/Lyn/Cdkn1a/Tgfb1/Ptprc/Nfam1/Ptpn6
GO:0031341	regulation of cell killing	10.9362	0.00259352	0.0378457	Inpp5d/Cx3cr1/Itgam		GO:0001818	negative regulation of cytokine production	6.68934	6.86471e-09	2.01105e-07	Pglyrp1/Tyrobp/Cx3cr1/Fcgr2b/Laptm5/Lgals9/Nckap1l/Mertk/Apod/Prg4/Tgfb1/Ptprc/Trim30a/Pycard/Ptpn6
GO:0097305	response to alcohol	5.2259	0.0026041	0.0378457	Fkbp5/Sgk1/Trh/Th/Cartpt		GO:0001910	regulation of leukocyte mediated cytotoxicity	15.1944	7.06313e-09	2.04593e-07	Tyrobp/Cx3cr1/Itgam/Lgals9/Spi1/Nckap1l/Tgfb1/Ptprc/H2-K1
GO:0048880	sensory system development	4.2805	0.00263224	0.0378457	C1qa/Meis2/Th/Itgam/Dlx1/Crybb1		GO:0071216	cellular response to biotic stimulus	7.25656	8.01729e-09	2.29651e-07	Ly86/Cx3cr1/Fcgr2b/Ccr5/Spi1/Lyn/Lcn2/Nos3/Plcg2/Fcgr4/Trim30a/Hmgcs2/Pycard/Ptpn6
GO:0010001	glial cell differentiation	5.13611	0.00280623	0.039904	C1qa/Csf1r/Spint1/Itgam/Dlx1		GO:0071222	cellular response to lipopolysaccharide	7.9602	9.34022e-09	2.64605e-07	Ly86/Cx3cr1/Ccr5/Spi1/Lyn/Lcn2/Nos3/Plcg2/Fcgr4/Trim30a/Hmgcs2/Pycard/Ptpn6
GO:0030595	leukocyte chemotaxis	6.75529	0.00286921	0.0403561	Csf1r/Ptpro/Cx3cr1/Itgam		GO:0042098	T cell proliferation	7.91916	9.94e-09	2.78536e-07	Itgb2/Itgam/Laptm5/Lgals9/Dock8/Nckap1l/Rac2/Dock2/Tgfb1/Ptprc/Icosl/Pycard/Ptpn6
GO:0030099	myeloid cell differentiation	4.18072	0.0029591	0.0408726	C1qc/Csf1r/Inpp5d/Meis2/Itgam/Cartpt		GO:0019882	antigen processing and presentation	11.7008	1.32592e-08	3.67551e-07	Ctss/Fcgr3/Icam1/Fcgr1/Fcgr2b/Ifi30/Fcer1g/Fcgr4/H2-K1/Pycard
GO:0002275	myeloid cell activation involved in immune response	10.4275	0.00296911	0.0408726	Cx3cr1/Itgam/Ticam1		GO:0019884	antigen processing and presentation of exogenous antigen	23.6357	1.45597e-08	3.99309e-07	Ctss/Fcgr3/Fcgr1/Fcgr2b/Ifi30/Fcer1g/H2-K1
GO:0060070	canonical Wnt signaling pathway	5.01546	0.00310807	0.0422397	Ptpro/Dlx5/Fzd2/Shisa3/Lgr5		GO:0071677	positive regulation of mononuclear cell migration	13.813	1.66706e-08	4.52387e-07	Csf1r/Cx3cr1/Lgals9/Dock8/Spi1/C3ar1/Tgfb1/C5ar1/Pycard
GO:0051412	response to corticosterone	23.9137	0.0031337	0.0422397	Trh/Cartpt		GO:0042113	B cell activation	6.78072	1.90015e-08	5.1027e-07	Tyrobp/Fcgr2b/Laptm5/Spi1/Nckap1l/Lyn/Cdkn1a/Tgfb1/Lfng/Plcg2/Ptprc/Icosl/Nfam1/Ptpn6
GO:0007389	pattern specification process	4.08549	0.00331561	0.0442309	C1qa/Meis2/Tshz1/Sp8/Itgam/Dlx1		GO:0022407	regulation of cell-cell adhesion	4.99345	1.92828e-08	5.12485e-07	Itgb2/Icam1/Ccr5/Laptm5/Lgals9/Tnfaip8l2/Dock8/Spi1/Nckap1l/Lyn/Selp/Tgfb1/F11r/Ptprc/Sele/Icosl/Pycard/Ptpn6
GO:0009308	amine metabolic process	9.96405	0.00337657	0.0442784	Trh/Th/Itgam		GO:0048002	antigen processing and presentation of peptide antigen	16.5864	2.4651e-08	6.44767e-07	Ctss/Fcgr3/Fcgr1/Fcgr2b/Ifi30/Fcer1g/H2-K1/Pycard
GO:0009954	proximal/distal pattern formation	22.994	0.0033876	0.0442784	Sp8/Dlx1		GO:0045088	regulation of innate immune response	4.91272	2.47602e-08	6.44767e-07	Tyrobp/Myo1f/Lgals9/Cfh/Spi1/Lyn/Ncf1/Tgfb1/Plcg2/Tlr13/Irf7/Pik3ap1/Trim30a/Parp14/Rsad2/Pycard/Rigi/Ptpn6
GO:0045685	regulation of glial cell differentiation	9.85456	0.00348351	0.0450766	Csf1r/Spint1/Dlx1		GO:0150076	neuroinflammatory response	12.9708	2.9226e-08	7.53448e-07	C1qa/Csf1r/Ctsc/Tyrobp/Cx3cr1/Itgam/Lyn/C5ar1/Plcg2
GO:0070661	leukocyte proliferation	4.85262	0.00357916	0.0454246	Csf1r/Laptm5/Inpp5d/Itgam/Ticam1		GO:0002524	hypersensitivity	49.241	3.03098e-08	7.66064e-07	Fcgr3/Fcgr1/Fcgr2b/Fcer1g/Fcgr4
GO:0060021	roof of mouth development	9.74744	0.00359251	0.0454246	Dlx5/Fzd2/Tshz1		GO:0042590	antigen processing and presentation of exogenous peptide antigen via MHC class I	49.241	3.03098e-08	7.66064e-07	Fcgr3/Fcgr1/Ifi30/Fcer1g/H2-K1
GO:0031342	negative regulation of cell killing	22.1423	0.00365081	0.0454246	Inpp5d/Cx3cr1		GO:1902105	regulation of leukocyte differentiation	5.92868	3.45488e-08	8.64727e-07	C1qc/Csf1r/Pglyrp1/Tyrobp/Itgam/Lgals9/Spi1/Nckap1l/Lyn/Tmem176a/Hcls1/Tgfb1/Ptprc/Nfam1/Ptpn6
GO:0060907	positive regulation of macrophage cytokine production	22.1423	0.00365081	0.0454246	Laptm5/Ticam1		GO:0032496	response to lipopolysaccharide	5.88928	3.77347e-08	9.35385e-07	Ly86/Cx3cr1/Ccr5/Lgals9/Spi1/Lyn/Lcn2/Nos3/Plcg2/Fcgr4/Trim30a/Ncf2/Hmgcs2/Pycard/Ptpn6
GO:0097529	myeloid leukocyte migration	6.29309	0.00369911	0.0455871	Csf1r/Ptpro/Cx3cr1/Itgam		GO:0002438	acute inflammatory response to antigenic stimulus	29.5446	3.87946e-08	9.47891e-07	Fcgr3/Icam1/Fcgr1/Fcgr2b/Fcer1g/Fcgr4
GO:0048736	appendage development	6.19527	0.0039115	0.0465647	Sall1/Dlx5/Sall3/Sp8		GO:0042554	superoxide anion generation	20.6812	3.89746e-08	9.47891e-07	Itgb2/Tyrobp/Itgam/Ncf1/Rac2/Tgfb1/Ncf2
GO:0060173	limb development	6.19527	0.0039115	0.0465647	Sall1/Dlx5/Sall3/Sp8		GO:0002704	negative regulation of leukocyte mediated immunity	15.0068	5.53764e-08	1.33421e-06	Cx3cr1/Fcgr2b/Lgals9/Spi1/Nckap1l/Tgfb1/Ptprc/Ptpn6
GO:0001780	neutrophil homeostasis	21.3515	0.00392327	0.0465647	Csf1r/Itgam		GO:0002819	regulation of adaptive immune response	7.58363	6.11021e-08	1.45853e-06	Fcgr3/Fcgr1/Fcgr2b/Fcer1g/Nckap1l/Tgfb1/Irf7/Ptprc/H2-K1/Rsad2/Pycard/Ptpn6
GO:0051450	myoblast proliferation	21.3515	0.00392327	0.0465647	Csf1r/Meis2		GO:0002706	regulation of lymphocyte mediated immunity	8.33308	8.52744e-08	2.01686e-06	Fcgr3/Fcgr1/Fcgr2b/Lgals9/Fcer1g/Nckap1l/Tgfb1/Ptprc/H2-K1/Rsad2/Ptpn6
GO:0050900	leukocyte migration	4.72977	0.00399153	0.0465647	Csf1r/Ptpro/Selplg/Cx3cr1/Itgam		GO:0061756	leukocyte adhesion to vascular endothelial cell	18.3833	9.15963e-08	2.14668e-06	Itgb2/Selplg/Icam1/Cx3cr1/Itgam/Selp/Sele
GO:0007600	sensory perception	3.93318	0.00399434	0.0465647	Fzd2/Ctss/Omp/Th/Cartpt/Crybb1		GO:0001774	microglial cell activation	17.9837	1.07281e-07	2.49163e-06	C1qa/Csf1r/Ctsc/Tyrobp/Cx3cr1/Itgam/C5ar1
GO:0002444	myeloid leukocyte mediated immunity	9.3413	0.00404932	0.0467841	Cx3cr1/Itgam/Ticam1		GO:1903706	regulation of hemopoiesis	5.01552	1.19281e-07	2.74558e-06	C1qc/Csf1r/Pglyrp1/Tyrobp/Itgam/Csf3r/Lgals9/Spi1/Nckap1l/Lyn/Tmem176a/Hcls1/Tgfb1/Ptprc/Nfam1/Ptpn6
GO:0045671	negative regulation of osteoclast differentiation	20.6153	0.0042049	0.0473143	Inpp5d/Cartpt		GO:0030098	lymphocyte differentiation	4.91131	1.58776e-07	3.62234e-06	Pglyrp1/Laptm5/Lgals9/Fcer1g/Spi1/Nckap1l/Mertk/Dock2/Tgfb1/Lfng/Plcg2/Ptprc/Icosl/Rsad2/Nfam1/Ptpn6
GO:0048521	negative regulation of behavior	20.6153	0.0042049	0.0473143	Trh/Cartpt		GO:0042116	macrophage activation	10.636	1.66937e-07	3.77512e-06	C1qa/Csf1r/Ctsc/Tyrobp/Cx3cr1/Itgam/Lgals9/C5ar1/Plcg2
GO:0050901	leukocyte tethering or rolling	20.6153	0.0042049	0.0473143	Selplg/Cx3cr1		GO:0002269	leukocyte activation involved in inflammatory response	16.545	1.94663e-07	4.36384e-06	C1qa/Csf1r/Ctsc/Tyrobp/Cx3cr1/Itgam/C5ar1
GO:0045639	positive regulation of myeloid cell differentiation	9.05823	0.00441412	0.0492402	Csf1r/Inpp5d/Itgam		GO:0050729	positive regulation of inflammatory response	8.81928	1.98933e-07	4.42111e-06	Ctss/Fcgr3/Csf1r/Ctsc/Fcgr1/Ccr5/Fcer1g/Tgfb1/Plcg2/Pycard
							GO:0002456	T cell mediated immunity	10.034	2.76165e-07	6.08507e-06	Ctsc/Icam1/Ctsh/Nckap1l/Fcgr4/Ptprc/H2-K1/Myo1g/Rsad2
							GO:0045807	positive regulation of endocytosis	7.38614	2.9061e-07	6.3491e-06	Fcgr3/Fcgr1/Fcgr2b/Fcer1g/Nckap1l/Mertk/Dock2/Plcg2/Ptprc/Sele/Pycard
							GO:2000377	regulation of reactive oxygen species metabolic process	8.44131	2.99872e-07	6.49638e-06	Itgb2/Tyrobp/Itgam/Fbln5/Cdkn1a/Lcn2/Tgfb1/Plcg2/Trim30a/Ncf2
							GO:0002712	regulation of B cell mediated immunity	15.3194	3.35602e-07	7.034e-06	Fcgr3/Fcgr1/Fcgr2b/Fcer1g/Tgfb1/Ptprc/Ptpn6
							GO:0002889	regulation of immunoglobulin mediated immune response	15.3194	3.35602e-07	7.034e-06	Fcgr3/Fcgr1/Fcgr2b/Fcer1g/Tgfb1/Ptprc/Ptpn6
							GO:0061900	glial cell activation	15.3194	3.35602e-07	7.034e-06	C1qa/Csf1r/Ctsc/Tyrobp/Cx3cr1/Itgam/C5ar1
							GO:0072678	T cell migration	15.3194	3.35602e-07	7.034e-06	Icam1/Lgals9/Dock8/Apod/F11r/Myo1g/Pycard
							GO:0050851	antigen receptor-mediated signaling pathway	8.20683	3.89913e-07	8.10641e-06	Laptm5/Nckap1l/Lyn/Plcg2/Ptprc/Icosl/Cd53/Fyb1/Nfam1/Ptpn6
							GO:1903037	regulation of leukocyte cell-cell adhesion	5.28593	4.13539e-07	8.52884e-06	Itgb2/Icam1/Laptm5/Lgals9/Tnfaip8l2/Dock8/Nckap1l/Selp/Tgfb1/Ptprc/Sele/Icosl/Pycard/Ptpn6
							GO:0098883	synapse pruning	31.0996	4.24335e-07	8.68202e-06	C1qb/C1qa/C1qc/Cx3cr1/Itgam
							GO:0002455	humoral immune response mediated by circulating immunoglobulin	20.2591	4.33515e-07	8.80001e-06	C1qb/C1qa/C1qc/Fcgr2b/Ptprc/Ptpn6
							GO:0002698	negative regulation of immune effector process	9.49647	4.42804e-07	8.91834e-06	Pglyrp1/Cx3cr1/Fcgr2b/Lgals9/Spi1/Nckap1l/Tgfb1/Ptprc/Ptpn6
							GO:0070664	negative regulation of leukocyte proliferation	11.2551	5.37358e-07	1.07388e-05	Tyrobp/Fcgr2b/Laptm5/Lgals9/Lyn/Tgfb1/Ccl12/Ptpn6
							GO:0022409	positive regulation of cell-cell adhesion	5.62754	5.41961e-07	1.07475e-05	Itgb2/Icam1/Ccr5/Lgals9/Dock8/Nckap1l/Selp/Tgfb1/F11r/Ptprc/Sele/Icosl/Pycard
							GO:0051250	negative regulation of lymphocyte activation	7.77489	6.43428e-07	1.26623e-05	Pglyrp1/Tyrobp/Fcgr2b/Laptm5/Lgals9/Tnfaip8l2/Mertk/Lyn/Tgfb1/Ptpn6
							GO:0030168	platelet activation	10.867	7.05153e-07	1.37719e-05	Cfh/Fcer1g/Mertk/Lyn/Vwf/Selp/F11r/Ptpn6
							GO:0030225	macrophage differentiation	13.3427	8.81122e-07	1.69517e-05	C1qc/Csf1r/Itgam/Spi1/Hcls1/Tgfb1/Ucp2
							GO:0031663	lipopolysaccharide-mediated signaling pathway	13.3427	8.81122e-07	1.69517e-05	Ly86/Spi1/Lyn/Nos3/Plcg2/Trim30a/Ptpn6
							GO:0006959	humoral immune response	8.71807	9.15549e-07	1.74836e-05	C1qb/C1qa/C1qc/Pglyrp1/Fcgr2b/Cfh/Ccl12/Ptprc/Ptpn6
							GO:0001911	negative regulation of leukocyte mediated cytotoxicity	26.8587	9.41618e-07	1.77189e-05	Cx3cr1/Lgals9/Nckap1l/Tgfb1/Ptprc
							GO:0002495	antigen processing and presentation of peptide antigen via MHC class II	26.8587	9.41618e-07	1.77189e-05	Ctss/Fcgr2b/Ifi30/Fcer1g/Pycard
							GO:0002833	positive regulation of response to biotic stimulus	4.54532	1.0591e-06	1.97852e-05	Ly86/Tyrobp/Lgals9/Spi1/Lyn/Mmrn2/Plcg2/Tlr13/Irf7/Pik3ap1/Trim30a/Rsad2/Pycard/Rigi/Ptpn6
							GO:0002504	antigen processing and presentation of peptide or polysaccharide antigen via MHC class II	24.6205	1.49932e-06	2.78075e-05	Ctss/Fcgr2b/Ifi30/Fcer1g/Pycard
							GO:0001913	T cell mediated cytotoxicity	16.1152	1.77148e-06	3.26205e-05	Ctsc/Ctsh/Nckap1l/Fcgr4/Ptprc/H2-K1
							GO:0002822	regulation of adaptive immune response based on somatic recombination of immune receptors built from immunoglobulin superfamily domains	6.87083	1.99097e-06	3.64023e-05	Fcgr3/Fcgr1/Fcgr2b/Fcer1g/Nckap1l/Tgfb1/Ptprc/H2-K1/Rsad2/Ptpn6
							GO:2000379	positive regulation of reactive oxygen species metabolic process	11.8178	2.03071e-06	3.68673e-05	Itgb2/Tyrobp/Itgam/Cdkn1a/Lcn2/Tgfb1/Plcg2
							GO:0002688	regulation of leukocyte chemotaxis	9.45426	2.04864e-06	3.69328e-05	Csf1r/Cx3cr1/Spi1/Nckap1l/Lyn/Rac2/C3ar1/C5ar1
							GO:0002695	negative regulation of leukocyte activation	6.67674	2.57861e-06	4.61643e-05	Pglyrp1/Tyrobp/Fcgr2b/Laptm5/Lgals9/Tnfaip8l2/Mertk/Lyn/Tgfb1/Ptpn6
							GO:0070665	positive regulation of leukocyte proliferation	7.65183	2.72625e-06	4.84708e-05	Csf1r/Csf2rb/Nckap1l/Lyn/Cdkn1a/Rac2/Ptprc/Icosl/Pycard
							GO:0031342	negative regulation of cell killing	21.8849	2.79035e-06	4.92708e-05	Cx3cr1/Lgals9/Nckap1l/Tgfb1/Ptprc
							GO:0032613	interleukin-10 production	14.7723	2.99552e-06	5.18284e-05	Tyrobp/Fcgr2b/Lgals9/Fcer1g/Plcg2/Pycard
							GO:0032653	regulation of interleukin-10 production	14.7723	2.99552e-06	5.18284e-05	Tyrobp/Fcgr2b/Lgals9/Fcer1g/Plcg2/Pycard
							GO:0050853	B cell receptor signaling pathway	14.7723	2.99552e-06	5.18284e-05	Nckap1l/Lyn/Plcg2/Ptprc/Nfam1/Ptpn6
							GO:0043312	neutrophil degranulation	36.3626	3.29787e-06	5.66794e-05	Itgb2/Myo1f/Itgam/Spi1
							GO:1903039	positive regulation of leukocyte cell-cell adhesion	5.75204	3.4208e-06	5.82811e-05	Itgb2/Icam1/Lgals9/Dock8/Nckap1l/Selp/Tgfb1/Ptprc/Sele/Icosl/Pycard
							GO:0030099	myeloid cell differentiation	4.13211	3.43628e-06	5.82811e-05	C1qc/Csf1r/Tyrobp/Itgam/Csf3r/Fcer1g/Spi1/Nckap1l/Lyn/Hcls1/Rac2/Tgfb1/Ucp2/Ptpn6/Fli1
							GO:0002690	positive regulation of leukocyte chemotaxis	10.8848	3.55099e-06	5.94445e-05	Csf1r/Cx3cr1/Spi1/Nckap1l/Rac2/C3ar1/C5ar1
							GO:0050672	negative regulation of lymphocyte proliferation	10.8848	3.55099e-06	5.94445e-05	Tyrobp/Fcgr2b/Laptm5/Lgals9/Lyn/Tgfb1/Ptpn6
							GO:0031343	positive regulation of cell killing	14.1814	3.82569e-06	6.36299e-05	Tyrobp/Itgam/Ccr5/Spi1/Ptprc/H2-K1
							GO:0032945	negative regulation of mononuclear cell proliferation	10.7435	3.87884e-06	6.41003e-05	Tyrobp/Fcgr2b/Laptm5/Lgals9/Lyn/Tgfb1/Ptpn6
							GO:0009611	response to wounding	3.82764	4.23916e-06	6.96086e-05	Tyrobp/Cfh/Fcer1g/Lcp1/Mertk/Lyn/Cdkn1a/Vwf/Apod/Angptl4/Pecam1/Selp/Tgfb1/F11r/Plcg2/Ptpn6
							GO:0002707	negative regulation of lymphocyte mediated immunity	13.9033	4.30591e-06	7.00619e-05	Fcgr2b/Lgals9/Nckap1l/Tgfb1/Ptprc/Ptpn6
							GO:0030100	regulation of endocytosis	4.66966	4.32112e-06	7.00619e-05	Fcgr3/Fcgr1/Fcgr2b/Fcer1g/Nckap1l/Mertk/Dock2/Hck/Tgfb1/Plcg2/Ptprc/Sele/Pycard
							GO:0050867	positive regulation of cell activation	4.65551	4.46633e-06	7.19637e-05	Csf1r/Ctsc/Tyrobp/Lgals9/Dock8/Spi1/Nckap1l/Cdkn1a/Selp/Tgfb1/Ptprc/Icosl/Pycard
							GO:0002864	regulation of acute inflammatory response to antigenic stimulus	33.7652	4.58679e-06	7.34456e-05	Fcgr3/Fcgr1/Fcgr2b/Fcer1g
							GO:0090322	regulation of superoxide metabolic process	19.6964	4.82639e-06	7.68052e-05	Itgb2/Tyrobp/Itgam/Fbln5/Tgfb1
							GO:0042129	regulation of T cell proliferation	7.0907	5.10441e-06	8.0731e-05	Laptm5/Lgals9/Nckap1l/Rac2/Tgfb1/Ptprc/Icosl/Pycard/Ptpn6
							GO:0002437	inflammatory response to antigenic stimulus	13.3787	5.41358e-06	8.4583e-05	Fcgr3/Icam1/Fcgr1/Fcgr2b/Fcer1g/Fcgr4
							GO:0061082	myeloid leukocyte cytokine production	13.3787	5.41358e-06	8.4583e-05	Laptm5/Fcer1g/Tgfb1/Plcg2/Pycard/Rigi
							GO:0002446	neutrophil mediated immunity	19.061	5.71567e-06	8.8765e-05	Itgb2/Myo1f/Itgam/Spi1/Ncf1
							GO:0032956	regulation of actin cytoskeleton organization	4.54532	5.79267e-06	8.88268e-05	Fam107a/Csf1r/Icam1/Myo1f/Nckap1l/Hcls1/Rac2/Pecam1/Hck/Tgfb1/F11r/Capg/Pycard
							GO:0002440	production of molecular mediator of immune response	6.09166	5.84972e-06	8.88268e-05	Fcgr2b/Laptm5/Fcer1g/Tgfb1/Plcg2/Ptprc/Icosl/Rsad2/Pycard/Rigi
							GO:0045637	regulation of myeloid cell differentiation	6.09166	5.84972e-06	8.88268e-05	C1qc/Csf1r/Tyrobp/Itgam/Csf3r/Spi1/Nckap1l/Lyn/Hcls1/Tgfb1
							GO:0071887	leukocyte apoptotic process	8.2211	5.85747e-06	8.88268e-05	Fcgr2b/Itgam/Ccr5/Fcer1g/Dock8/Mertk/Lyn/Hcls1
							GO:2000107	negative regulation of leukocyte apoptotic process	13.1309	6.04832e-06	9.11846e-05	Fcgr2b/Ccr5/Fcer1g/Dock8/Mertk/Hcls1
							GO:0002702	positive regulation of production of molecular mediator of immune response	8.15023	6.24712e-06	9.36342e-05	Laptm5/Fcer1g/Tgfb1/Plcg2/Ptprc/Rsad2/Pycard/Rigi
							GO:0050866	negative regulation of cell activation	6.0295	6.40559e-06	9.51403e-05	Pglyrp1/Tyrobp/Fcgr2b/Laptm5/Lgals9/Tnfaip8l2/Mertk/Lyn/Tgfb1/Ptpn6
							GO:0072676	lymphocyte migration	9.96684	6.42142e-06	9.51403e-05	Icam1/Lgals9/Dock8/Apod/F11r/Myo1g/Pycard
							GO:0001776	leukocyte homeostasis	8.01209	7.09251e-06	0.000104483	Csf1r/Fcgr2b/Itgam/Fcer1g/Nckap1l/Mertk/Lyn/Tgfb1
							GO:0007596	blood coagulation	6.77455	7.40427e-06	0.000108456	Cfh/Fcer1g/Mertk/Lyn/Vwf/Angptl4/Selp/F11r/Ptpn6
							GO:0009615	response to virus	4.41471	7.93307e-06	0.000115545	Ifitm3/Lgals9/Lcn2/Tgfb1/Tlr13/Irf7/Ptprc/Trim30a/Oasl2/Rsad2/Ifit1/Pycard/Rigi
							GO:0002262	myeloid cell homeostasis	5.85041	8.35654e-06	0.000121029	Csf1r/Fcgr2b/Itgam/Fcer1g/Spi1/Nckap1l/Mertk/Lyn/Hcls1/Rac2
							GO:0002821	positive regulation of adaptive immune response	7.81344	8.54089e-06	0.000123008	Fcgr3/Fcgr1/Fcer1g/Tgfb1/Ptprc/H2-K1/Rsad2/Pycard
							GO:0050817	coagulation	6.64753	8.63299e-06	0.000123644	Cfh/Fcer1g/Mertk/Lyn/Vwf/Angptl4/Selp/F11r/Ptpn6
							GO:0007599	hemostasis	6.60624	9.07953e-06	0.000129321	Cfh/Fcer1g/Mertk/Lyn/Vwf/Angptl4/Selp/F11r/Ptpn6
							GO:0002700	regulation of production of molecular mediator of immune response	6.52518	1.00322e-05	0.000142104	Fcgr2b/Laptm5/Fcer1g/Tgfb1/Plcg2/Ptprc/Rsad2/Pycard/Rigi
							GO:0030888	regulation of B cell proliferation	12.0181	1.01934e-05	0.000143599	Tyrobp/Fcgr2b/Nckap1l/Lyn/Cdkn1a/Ptprc
							GO:0002673	regulation of acute inflammatory response	16.8826	1.06283e-05	0.000148107	Fcgr3/Fcgr1/Fcgr2b/Ccr5/Fcer1g
							GO:0050832	defense response to fungus	16.8826	1.06283e-05	0.000148107	Cx3cr1/Spi1/Ncf1/Tgfb1/Plcg2
							GO:0061515	myeloid cell development	9.19165	1.1003e-05	0.000152505	Csf1r/Tyrobp/Itgam/Nckap1l/Rac2/Ptpn6/Fli1
							GO:0002532	production of molecular mediator involved in inflammatory response	9.09064	1.18369e-05	0.000162316	Pld4/Fcer1g/Lyn/Ncf1/Apod/Pycard/Ptpn6
							GO:2000106	regulation of leukocyte apoptotic process	9.09064	1.18369e-05	0.000162316	Fcgr2b/Ccr5/Fcer1g/Dock8/Mertk/Lyn/Hcls1
							GO:0002696	positive regulation of leukocyte activation	4.58945	1.22449e-05	0.000165468	Csf1r/Ctsc/Tyrobp/Lgals9/Dock8/Spi1/Nckap1l/Cdkn1a/Tgfb1/Ptprc/Icosl/Pycard
							GO:0150146	cell junction disassembly	16.4137	1.22592e-05	0.000165468	C1qb/C1qa/C1qc/Cx3cr1/Itgam
							GO:1902624	positive regulation of neutrophil migration	16.4137	1.22592e-05	0.000165468	Myo1f/Nckap1l/Rac2/C3ar1/C5ar1
							GO:0030183	B cell differentiation	7.38614	1.29177e-05	0.000173447	Laptm5/Spi1/Nckap1l/Lfng/Plcg2/Ptprc/Nfam1/Ptpn6
							GO:0002431	Fc receptor mediated stimulatory signaling pathway	26.2618	1.36581e-05	0.000179868	Fcer1g/Lyn/Ptprc/Myo1g
							GO:0002675	positive regulation of acute inflammatory response	26.2618	1.36581e-05	0.000179868	Fcgr3/Fcgr1/Ccr5/Fcer1g
							GO:0019886	antigen processing and presentation of exogenous peptide antigen via MHC class II	26.2618	1.36581e-05	0.000179868	Ctss/Fcgr2b/Ifi30/Fcer1g
							GO:0050921	positive regulation of chemotaxis	7.32889	1.3675e-05	0.000179868	Csf1r/Cx3cr1/Spi1/Nckap1l/Rac2/C3ar1/Tgfb1/C5ar1
							GO:0045089	positive regulation of innate immune response	4.18615	1.399e-05	0.000182391	Tyrobp/Lgals9/Spi1/Lyn/Plcg2/Tlr13/Irf7/Pik3ap1/Trim30a/Rsad2/Pycard/Rigi/Ptpn6
							GO:0002474	antigen processing and presentation of peptide antigen via MHC class I	15.97	1.40791e-05	0.000182391	Fcgr3/Fcgr1/Ifi30/Fcer1g/H2-K1
							GO:0061081	positive regulation of myeloid leukocyte cytokine production involved in immune response	15.97	1.40791e-05	0.000182391	Laptm5/Fcer1g/Plcg2/Pycard/Rigi
							GO:0048872	homeostasis of number of cells	4.15221	1.52491e-05	0.000196561	Csf1r/Cx3cr1/Fcgr2b/Itgam/Fcer1g/Spi1/Nckap1l/Mertk/Lyn/Hcls1/Rac2/Tgfb1/Nos3
							GO:0002714	positive regulation of B cell mediated immunity	15.5498	1.61028e-05	0.00020551	Fcgr3/Fcgr1/Fcer1g/Tgfb1/Ptprc
							GO:0002891	positive regulation of immunoglobulin mediated immune response	15.5498	1.61028e-05	0.00020551	Fcgr3/Fcgr1/Fcer1g/Tgfb1/Ptprc
							GO:0050777	negative regulation of immune response	6.11267	1.69454e-05	0.000215198	Pglyrp1/Fcgr2b/Lgals9/Spi1/Nckap1l/Tgfb1/Ptprc/Parp14/Ptpn6
							GO:0050798	activated T cell proliferation	15.1511	1.83462e-05	0.000231846	Itgb2/Itgam/Laptm5/Icosl/Pycard
							GO:0030101	natural killer cell activation	10.7435	1.95851e-05	0.000246295	Pglyrp1/Tyrobp/Lgals9/Mertk/Fcgr4/Ptprc
							GO:0007015	actin filament organization	3.75169	2.19839e-05	0.000275119	Fam107a/Icam1/Myo1f/Lcp1/Nckap1l/Arpc1b/Hcls1/Rac2/Pecam1/Tagln2/F11r/Myo1g/Capg/Pycard
							GO:0002367	cytokine production involved in immune response	8.19057	2.34546e-05	0.000290701	Laptm5/Fcer1g/Tgfb1/Plcg2/Rsad2/Pycard/Rigi
							GO:0002718	regulation of cytokine production involved in immune response	8.19057	2.34546e-05	0.000290701	Laptm5/Fcer1g/Tgfb1/Plcg2/Rsad2/Pycard/Rigi
							GO:0032970	regulation of actin filament-based process	3.9801	2.37967e-05	0.000293531	Fam107a/Csf1r/Icam1/Myo1f/Nckap1l/Hcls1/Rac2/Pecam1/Hck/Tgfb1/F11r/Capg/Pycard
							GO:0002720	positive regulation of cytokine production involved in immune response	10.2764	2.53107e-05	0.000309247	Laptm5/Fcer1g/Plcg2/Rsad2/Pycard/Rigi
							GO:0050830	defense response to Gram-positive bacterium	10.2764	2.53107e-05	0.000309247	Pglyrp1/Myo1f/Ncf1/Hck/C5ar1/Pycard
							GO:1902107	positive regulation of leukocyte differentiation	5.78046	2.64076e-05	0.000319619	Csf1r/Tyrobp/Itgam/Lgals9/Spi1/Nckap1l/Hcls1/Tgfb1/Ptprc
							GO:1903708	positive regulation of hemopoiesis	5.78046	2.64076e-05	0.000319619	Csf1r/Tyrobp/Itgam/Lgals9/Spi1/Nckap1l/Hcls1/Tgfb1/Ptprc
							GO:0002573	myeloid leukocyte differentiation	5.07203	2.88102e-05	0.000347069	C1qc/Csf1r/Tyrobp/Itgam/Fcer1g/Spi1/Lyn/Hcls1/Tgfb1/Ucp2
							GO:0002758	innate immune response-activating signaling pathway	4.57733	2.93785e-05	0.000352268	Tyrobp/Lyn/Plcg2/Tlr13/Irf7/Pik3ap1/Trim30a/Rsad2/Pycard/Rigi/Ptpn6
							GO:0043410	positive regulation of MAPK cascade	3.65231	2.95496e-05	0.000352679	Csf1r/Icam1/Fcgr2b/Laptm5/Spi1/Lyn/Naip5/Pecam1/Tgfb1/C5ar1/Plcg2/Ptprc/Trim30a/Pycard
							GO:0050920	regulation of chemotaxis	5.68773	2.99996e-05	0.000356401	Csf1r/Cx3cr1/Spi1/Nckap1l/Lyn/Rac2/C3ar1/Tgfb1/C5ar1
							GO:0002286	T cell activation involved in immune response	7.87855	3.01825e-05	0.000356928	Icam1/Tyrobp/Fcer1g/Lcp1/Nckap1l/Tgfb1/Icosl
							GO:0051251	positive regulation of lymphocyte activation	4.56127	3.03408e-05	0.000357163	Csf1r/Tyrobp/Lgals9/Dock8/Spi1/Nckap1l/Cdkn1a/Tgfb1/Ptprc/Icosl/Pycard
							GO:0032930	positive regulation of superoxide anion generation	21.487	3.18044e-05	0.000369332	Itgb2/Tyrobp/Itgam/Tgfb1
							GO:0090023	positive regulation of neutrophil chemotaxis	21.487	3.18044e-05	0.000369332	Nckap1l/Rac2/C3ar1/C5ar1
							GO:1905523	positive regulation of macrophage migration	21.487	3.18044e-05	0.000369332	Csf1r/Cx3cr1/C3ar1/C5ar1
							GO:0002708	positive regulation of lymphocyte mediated immunity	7.80423	3.20916e-05	0.000370996	Fcgr3/Fcgr1/Fcer1g/Tgfb1/Ptprc/H2-K1/Rsad2
							GO:0051897	positive regulation of phosphatidylinositol 3-kinase/protein kinase B signal transduction	5.59792	3.39979e-05	0.00039103	Csf1r/Cx3cr1/Mertk/Hcls1/Pecam1/Selp/Tgfb1/Pik3ap1/Ptpn6
							GO:0045785	positive regulation of cell adhesion	3.60457	3.41279e-05	0.00039103	Itgb2/Icam1/Ccr5/Lgals9/Dock8/Nckap1l/Selp/Tgfb1/F11r/Ptprc/Sele/Icosl/Pycard/Ptpn6
							GO:0050852	T cell receptor signaling pathway	7.6597	3.62083e-05	0.000413031	Laptm5/Plcg2/Ptprc/Icosl/Cd53/Fyb1/Ptpn6
							GO:1903305	regulation of regulated secretory pathway	6.38802	3.69574e-05	0.000419718	Itgb2/Itgam/Lgals9/Fcer1g/Spi1/Nckap1l/Lyn/Rac2
							GO:0009620	response to fungus	13.1309	3.73817e-05	0.00042083	Cx3cr1/Spi1/Ncf1/Tgfb1/Plcg2
							GO:0071622	regulation of granulocyte chemotaxis	13.1309	3.73817e-05	0.00042083	Csf1r/Nckap1l/Rac2/C3ar1/C5ar1
							GO:1904996	positive regulation of leukocyte adhesion to vascular endothelial cell	20.5527	3.82485e-05	0.000428528	Itgb2/Icam1/Selp/Sele
							GO:0045055	regulated exocytosis	4.90366	3.8398e-05	0.000428528	Itgb2/Myo1f/Itgam/Lgals9/Fcer1g/Spi1/Nckap1l/Lyn/Rac2/Fcgr4
							GO:1902622	regulation of neutrophil migration	12.8455	4.16577e-05	0.000462903	Myo1f/Nckap1l/Rac2/C3ar1/C5ar1
							GO:0006953	acute-phase response	19.6964	4.55983e-05	0.000499741	Ccr5/Lcn2/Serpina3n/Saa3
							GO:0032928	regulation of superoxide anion generation	19.6964	4.55983e-05	0.000499741	Itgb2/Tyrobp/Itgam/Tgfb1
							GO:0071624	positive regulation of granulocyte chemotaxis	19.6964	4.55983e-05	0.000499741	Nckap1l/Rac2/C3ar1/C5ar1
							GO:0002824	positive regulation of adaptive immune response based on somatic recombination of immune receptors built from immunoglobulin superfamily domains	7.38614	4.57482e-05	0.000499741	Fcgr3/Fcgr1/Fcer1g/Tgfb1/Ptprc/H2-K1/Rsad2
							GO:0002312	B cell activation involved in immune response	9.09064	5.09669e-05	0.00055207	Spi1/Tgfb1/Lfng/Plcg2/Ptprc/Icosl
							GO:0042100	B cell proliferation	9.09064	5.09669e-05	0.00055207	Tyrobp/Fcgr2b/Nckap1l/Lyn/Cdkn1a/Ptprc
							GO:0001912	positive regulation of leukocyte mediated cytotoxicity	12.3102	5.13385e-05	0.000553768	Tyrobp/Itgam/Spi1/Ptprc/H2-K1
							GO:0001773	myeloid dendritic cell activation	18.9085	5.39291e-05	0.000579289	Spi1/Dock2/Tgfb1/Pycard
							GO:0002753	cytoplasmic pattern recognition receptor signaling pathway	5.26537	5.48209e-05	0.000586425	Plcg2/Tlr13/Irf7/Pik3ap1/Trim30a/Rsad2/Pycard/Rigi/Ptpn6
							GO:0002761	regulation of myeloid leukocyte differentiation	7.01058	6.38456e-05	0.000680141	C1qc/Csf1r/Tyrobp/Itgam/Lyn/Hcls1/Tgfb1
							GO:0002218	activation of innate immune response	4.17994	6.69553e-05	0.000710332	Tyrobp/Lyn/Plcg2/Tlr13/Irf7/Pik3ap1/Trim30a/Rsad2/Pycard/Rigi/Ptpn6
							GO:0002357	defense response to tumor cell	35.4535	6.80145e-05	0.000718612	Laptm5/Spi1/Abi3
							GO:0006887	exocytosis	3.8432	6.9535e-05	0.000731679	Itgb2/Myo1f/Itgam/Lgals9/Fcer1g/Spi1/Nckap1l/Lyn/Rac2/Hck/Fcgr4/Myo1g
							GO:0050863	regulation of T cell activation	4.14	7.29645e-05	0.000764644	Laptm5/Lgals9/Tnfaip8l2/Dock8/Nckap1l/Rac2/Tgfb1/Ptprc/Icosl/Pycard/Ptpn6
							GO:0002861	regulation of inflammatory response to antigenic stimulus	17.5079	7.38448e-05	0.000770736	Fcgr3/Fcgr1/Fcgr2b/Fcer1g
							GO:0001780	neutrophil homeostasis	16.8826	8.55899e-05	0.000889721	Csf1r/Fcgr2b/Itgam/Mertk
							GO:0002863	positive regulation of inflammatory response to antigenic stimulus	32.2304	9.29416e-05	0.000962263	Fcgr3/Fcgr1/Fcer1g
							GO:0050901	leukocyte tethering or rolling	16.3005	9.86364e-05	0.00101309	Selplg/Cx3cr1/Selp/Sele
							GO:1904994	regulation of leukocyte adhesion to vascular endothelial cell	16.3005	9.86364e-05	0.00101309	Itgb2/Icam1/Selp/Sele
							GO:0050854	regulation of antigen receptor-mediated signaling pathway	10.5516	0.0001085	0.00110997	Laptm5/Lyn/Ptprc/Nfam1/Ptpn6
							GO:0001779	natural killer cell differentiation	15.7571	0.000113069	0.0011476	Pglyrp1/Lgals9/Mertk/Ptprc
							GO:0090022	regulation of neutrophil chemotaxis	15.7571	0.000113069	0.0011476	Nckap1l/Rac2/C3ar1/C5ar1
							GO:0007162	negative regulation of cell adhesion	4.28182	0.000119045	0.00120352	Fam107a/Myo1f/Laptm5/Lgals9/Tnfaip8l2/Spi1/Apod/Tgfb1/Ptprc/Ptpn6
							GO:0043301	negative regulation of leukocyte degranulation	29.5446	0.000123156	0.00124022	Lgals9/Spi1/Nckap1l
							GO:0002228	natural killer cell mediated immunity	10.1878	0.000128407	0.00128806	Tyrobp/Lgals9/Tgfb1/Fcgr4/Ptpn6
							GO:0045577	regulation of B cell differentiation	15.2488	0.000128973	0.00128873	Spi1/Nckap1l/Nfam1/Ptpn6
							GO:0002221	pattern recognition receptor signaling pathway	4.17591	0.000146108	0.00145197	Lyn/Plcg2/Tlr13/Irf7/Pik3ap1/Trim30a/Rsad2/Pycard/Rigi/Ptpn6
							GO:0002920	regulation of humoral immune response	14.7723	0.000146436	0.00145197	Fcgr2b/Cfh/Ptprc/Ptpn6
							GO:0051384	response to glucocorticoid	6.12776	0.000148891	0.00147065	Fam107a/Sult1a1/Tgfb1/Ucp2/Etnppl/Hmgcs2/Ucn
							GO:0002430	complement receptor mediated signaling pathway	27.2719	0.000159114	0.00155968	Itgam/C3ar1/C5ar1
							GO:0150078	positive regulation of neuroinflammatory response	27.2719	0.000159114	0.00155968	Csf1r/Ctsc/Plcg2
							GO:0002763	positive regulation of myeloid leukocyte differentiation	9.68675	0.000163374	0.00157745	Csf1r/Tyrobp/Itgam/Hcls1/Tgfb1
							GO:0032732	positive regulation of interleukin-1 production	9.68675	0.000163374	0.00157745	Tyrobp/Ccr5/Lgals9/Naip5/Pycard
							GO:1990868	response to chemokine	9.68675	0.000163374	0.00157745	Cx3cr1/Ccr5/Dock8/Lyn/Ccl12
							GO:1990869	cellular response to chemokine	9.68675	0.000163374	0.00157745	Cx3cr1/Ccr5/Dock8/Lyn/Ccl12
							GO:0032733	positive regulation of interleukin-10 production	14.3246	0.000165548	0.00159247	Lgals9/Fcer1g/Plcg2/Pycard
							GO:0032612	interleukin-1 production	7.31	0.000172031	0.00164257	Tyrobp/Cx3cr1/Ccr5/Lgals9/Naip5/Pycard
							GO:0032652	regulation of interleukin-1 production	7.31	0.000172031	0.00164257	Tyrobp/Cx3cr1/Ccr5/Lgals9/Naip5/Pycard
							GO:1901342	regulation of vasculature development	4.07511	0.000178195	0.00169515	Itgb2/Cx3cr1/Fbln5/Sparc/Stab1/C3ar1/Tgfb1/C5ar1/Nos3/Ptpn6
							GO:0042060	wound healing	3.73552	0.000180565	0.00171139	Cfh/Fcer1g/Mertk/Lyn/Cdkn1a/Vwf/Angptl4/Pecam1/Selp/F11r/Ptpn6
							GO:0030217	T cell differentiation	4.06111	0.00018323	0.00173028	Lgals9/Fcer1g/Spi1/Nckap1l/Dock2/Tgfb1/Lfng/Ptprc/Icosl/Rsad2
							GO:0050869	negative regulation of B cell activation	13.9033	0.000186398	0.00175378	Tyrobp/Fcgr2b/Laptm5/Lyn
							GO:0045639	positive regulation of myeloid cell differentiation	7.16232	0.000192407	0.00180373	Csf1r/Tyrobp/Itgam/Nckap1l/Hcls1/Tgfb1
							GO:0002923	regulation of humoral immune response mediated by circulating immunoglobulin	25.3239	0.000201257	0.00187307	Fcgr2b/Ptprc/Ptpn6
							GO:1900272	negative regulation of long-term synaptic potentiation	25.3239	0.000201257	0.00187307	Fam107a/Tyrobp/Cx3cr1
							GO:0045576	mast cell activation	9.09064	0.000220792	0.00204015	Fcgr3/Fcer1g/Lyn/Rac2/Ptpn6
							GO:0048525	negative regulation of viral process	9.09064	0.000220792	0.00204015	Ifitm3/Fam111a/Oasl2/Rsad2/Ifit1
							GO:0045619	regulation of lymphocyte differentiation	4.9241	0.000227486	0.0020945	Pglyrp1/Lgals9/Spi1/Nckap1l/Tgfb1/Ptprc/Nfam1/Ptpn6
							GO:0009743	response to carbohydrate	4.34124	0.000237164	0.00217583	Icam1/Lyn/Ncf1/Lcn2/Tgfb1/Ucp2/Ncf2/Slc2a5/Hmgcs2
							GO:0050855	regulation of B cell receptor signaling pathway	23.6357	0.000250018	0.00227755	Lyn/Nfam1/Ptpn6
							GO:0061760	antifungal innate immune response	23.6357	0.000250018	0.00227755	Cx3cr1/Spi1/Plcg2
							GO:0045453	bone resorption	8.81928	0.000254698	0.00230416	Ctss/Csf1r/Tmem119/Rac2/Fcgr4
							GO:0043254	regulation of protein-containing complex assembly	3.34467	0.000254727	0.00230416	Icam1/Lcp1/Nckap1l/Hcls1/Pecam1/Selp/Hck/Tgfb1/Plcg2/Trim30a/Capg/Pycard
							GO:0006956	complement activation	12.776	0.000260299	0.00232198	C1qb/C1qa/C1qc/Cfh
							GO:0033028	myeloid cell apoptotic process	12.776	0.000260299	0.00232198	Fcgr2b/Itgam/Ccr5/Fcer1g
							GO:0097028	dendritic cell differentiation	12.776	0.000260299	0.00232198	Spi1/Lyn/Tmem176a/Tgfb1
							GO:0097242	amyloid-beta clearance	12.776	0.000260299	0.00232198	Itgb2/Tyrobp/Itgam/C5ar1
							GO:0048246	macrophage chemotaxis	12.4398	0.000289028	0.00256936	Csf1r/Cx3cr1/C3ar1/C5ar1
							GO:0033627	cell adhesion mediated by integrin	8.56364	0.000292421	0.00259059	Itgb2/Icam1/Nckap1l/Lyn/Ptpn6
							GO:0051209	release of sequestered calcium ion into cytosol	6.62682	0.000293715	0.00259314	Ccr5/Lyn/Tgfb1/Plcg2/Ptprc/Ptpn6
							GO:0030041	actin filament polymerization	5.47846	0.000296714	0.0026018	Fam107a/Icam1/Nckap1l/Hcls1/Pecam1/Capg/Pycard
							GO:0031960	response to corticosteroid	5.47846	0.000296714	0.0026018	Fam107a/Sult1a1/Tgfb1/Ucp2/Etnppl/Hmgcs2/Ucn
							GO:0002281	macrophage activation involved in immune response	22.1584	0.000305815	0.00264561	Tyrobp/Cx3cr1/Plcg2
							GO:0010759	positive regulation of macrophage chemotaxis	22.1584	0.000305815	0.00264561	Csf1r/C3ar1/C5ar1
							GO:0060100	positive regulation of phagocytosis, engulfment	22.1584	0.000305815	0.00264561	Fcgr1/Nckap1l/Plcg2
							GO:1905155	positive regulation of membrane invagination	22.1584	0.000305815	0.00264561	Fcgr1/Nckap1l/Plcg2
							GO:0051283	negative regulation of sequestering of calcium ion	6.56546	0.000308862	0.00266303	Ccr5/Lyn/Tgfb1/Plcg2/Ptprc/Ptpn6
							GO:0010720	positive regulation of cell development	3.07264	0.000319329	0.00271337	Csf1r/Tyrobp/Cx3cr1/Itgam/Lgals9/Spi1/Nckap1l/Lyn/Hcls1/Spint1/Tgfb1/F11r/Ptprc
							GO:0002691	regulation of cellular extravasation	12.1209	0.000319963	0.00271337	Icam1/Pecam1/Selp/Sele
							GO:0030851	granulocyte differentiation	12.1209	0.000319963	0.00271337	C1qc/Spi1/Lyn/Hcls1
							GO:1905521	regulation of macrophage migration	12.1209	0.000319963	0.00271337	Csf1r/Cx3cr1/C3ar1/C5ar1
							GO:2000404	regulation of T cell migration	12.1209	0.000319963	0.00271337	Lgals9/Dock8/Apod/Pycard
							GO:0002244	hematopoietic progenitor cell differentiation	5.40685	0.000321444	0.00271699	Pld4/Spi1/Lyn/Tgfb1/Ptprc/Cebpd/Ptpn6
							GO:0060759	regulation of response to cytokine stimulus	5.37174	0.000334414	0.00281739	Laptm5/Naip5/Irf7/Ptprc/Parp14/Pycard/Rigi
							GO:0051282	regulation of sequestering of calcium ion	6.44609	0.000340993	0.00286345	Ccr5/Lyn/Tgfb1/Plcg2/Ptprc/Ptpn6
							GO:0010934	macrophage cytokine production	11.8178	0.000353201	0.00294677	Laptm5/Tgfb1/Plcg2/Pycard
							GO:0010935	regulation of macrophage cytokine production	11.8178	0.000353201	0.00294677	Laptm5/Tgfb1/Plcg2/Pycard
							GO:0002224	toll-like receptor signaling pathway	8.20683	0.000356769	0.00296694	Plcg2/Tlr13/Irf7/Pik3ap1/Trim30a
							GO:0051208	sequestering of calcium ion	6.33098	0.000375685	0.0031142	Ccr5/Lyn/Tgfb1/Plcg2/Ptprc/Ptpn6
							GO:0002347	response to tumor cell	11.5296	0.000388838	0.00319243	Laptm5/Spi1/Tgfb1/Abi3
							GO:0045071	negative regulation of viral genome replication	11.5296	0.000388838	0.00319243	Ifitm3/Fam111a/Oasl2/Rsad2
							GO:1904646	cellular response to amyloid-beta	11.5296	0.000388838	0.00319243	Icam1/Tyrobp/Fcgr2b/Lcn2
							GO:0019722	calcium-mediated signaling	4.54532	0.000390148	0.00319302	Cx3cr1/Ccr5/Cp/C3ar1/Plcg2/Ptprc/Gna15/Nfam1
							GO:0017157	regulation of exocytosis	4.52357	0.000402837	0.00328644	Itgb2/Itgam/Lgals9/Fcer1g/Spi1/Nckap1l/Lyn/Rac2
							GO:0030889	negative regulation of B cell proliferation	19.6964	0.000440135	0.00356814	Tyrobp/Fcgr2b/Lyn
							GO:0060099	regulation of phagocytosis, engulfment	19.6964	0.000440135	0.00356814	Fcgr1/Nckap1l/Plcg2
							GO:0006898	receptor-mediated endocytosis	3.96867	0.000457889	0.00368887	Itgb2/Ifitm3/Fcgr1/Fcgr2b/Itgam/Fcer1g/Plcg2/Fcgr4/Sele
							GO:0051607	defense response to virus	3.96867	0.000457889	0.00368887	Ifitm3/Irf7/Ptprc/Trim30a/Oasl2/Rsad2/Ifit1/Pycard/Rigi
							GO:0010543	regulation of platelet activation	10.9933	0.000467702	0.00375619	Fcer1g/Lyn/Selp/F11r
							GO:1904018	positive regulation of vasculature development	5.01362	0.00050681	0.00405763	Itgb2/Cx3cr1/C3ar1/Tgfb1/C5ar1/Nos3/Ptpn6
							GO:0051896	regulation of phosphatidylinositol 3-kinase/protein kinase B signal transduction	3.91031	0.000509648	0.00406693	Csf1r/Cx3cr1/Mertk/Hcls1/Pecam1/Selp/Tgfb1/Pik3ap1/Ptpn6
							GO:0032715	negative regulation of interleukin-6 production	10.7435	0.000511127	0.00406693	Nckap1l/Prg4/Trim30a/Ptpn6
							GO:0006027	glycosaminoglycan catabolic process	18.6597	0.000519438	0.00408266	Hexb/Pglyrp1/Tgfb1
							GO:0014004	microglia differentiation	18.6597	0.000519438	0.00408266	Csf1r/Itgam/Tgfb1
							GO:0033033	negative regulation of myeloid cell apoptotic process	18.6597	0.000519438	0.00408266	Fcgr2b/Ccr5/Fcer1g
							GO:1905153	regulation of membrane invagination	18.6597	0.000519438	0.00408266	Fcgr1/Nckap1l/Plcg2
							GO:0032611	interleukin-1 beta production	7.38614	0.000580858	0.00452403	Tyrobp/Cx3cr1/Ccr5/Naip5/Pycard
							GO:0032651	regulation of interleukin-1 beta production	7.38614	0.000580858	0.00452403	Tyrobp/Cx3cr1/Ccr5/Naip5/Pycard
							GO:0050871	positive regulation of B cell activation	7.38614	0.000580858	0.00452403	Spi1/Nckap1l/Cdkn1a/Tgfb1/Ptprc
							GO:0050671	positive regulation of lymphocyte proliferation	5.81205	0.000592631	0.00460182	Csf1r/Nckap1l/Cdkn1a/Ptprc/Icosl/Pycard
							GO:0048143	astrocyte activation	17.7267	0.000607337	0.00470185	C1qa/Csf1r/C5ar1
							GO:0034284	response to monosaccharide	4.22065	0.000637101	0.00491751	Icam1/Ncf1/Lcn2/Tgfb1/Ucp2/Ncf2/Slc2a5/Hmgcs2
							GO:0046631	alpha-beta T cell activation	4.78178	0.000671812	0.00516907	Lgals9/Nckap1l/Dock2/Tgfb1/Ptprc/Icosl/Rsad2
							GO:0032946	positive regulation of mononuclear cell proliferation	5.67256	0.000673704	0.00516907	Csf1r/Nckap1l/Cdkn1a/Ptprc/Icosl/Pycard
							GO:0045765	regulation of angiogenesis	3.75832	0.000677283	0.00518111	Itgb2/Cx3cr1/Fbln5/Sparc/Stab1/C3ar1/C5ar1/Nos3/Ptpn6
							GO:1904645	response to amyloid-beta	9.84819	0.000713769	0.00544407	Icam1/Tyrobp/Fcgr2b/Lcn2
							GO:0030833	regulation of actin filament polymerization	5.58323	0.000732353	0.00555296	Icam1/Nckap1l/Hcls1/Pecam1/Capg/Pycard
							GO:0050792	regulation of viral process	5.58323	0.000732353	0.00555296	Ifitm3/Fam111a/Trim30a/Oasl2/Rsad2/Ifit1
							GO:0008154	actin polymerization or depolymerization	4.70027	0.000743672	0.00562225	Fam107a/Icam1/Nckap1l/Hcls1/Pecam1/Capg/Pycard
							GO:0002279	mast cell activation involved in immune response	9.64721	0.000772168	0.00582061	Fcer1g/Lyn/Rac2/Ptpn6
							GO:0031348	negative regulation of defense response	4.09275	0.000778895	0.0058542	Pglyrp1/Cx3cr1/Fcgr2b/Lgals9/Tnfaip8l2/Tgfb1/Parp14/Ptpn6
							GO:0006925	inflammatory cell apoptotic process	16.1152	0.000810361	0.00605539	Fcgr2b/Itgam/Ccr5
							GO:0045649	regulation of macrophage differentiation	16.1152	0.000810361	0.00605539	C1qc/Hcls1/Tgfb1
							GO:0032602	chemokine production	6.71468	0.00089701	0.00662146	Csf1r/Lgals9/Apod/Tgfb1/Pycard
							GO:0032642	regulation of chemokine production	6.71468	0.00089701	0.00662146	Csf1r/Lgals9/Apod/Tgfb1/Pycard
							GO:0002823	negative regulation of adaptive immune response based on somatic recombination of immune receptors built from immunoglobulin superfamily domains	9.26889	0.000898956	0.00662146	Fcgr2b/Nckap1l/Ptprc/Ptpn6
							GO:0032731	positive regulation of interleukin-1 beta production	9.26889	0.000898956	0.00662146	Tyrobp/Ccr5/Naip5/Pycard
							GO:0070098	chemokine-mediated signaling pathway	9.26889	0.000898956	0.00662146	Cx3cr1/Ccr5/Lyn/Ccl12
							GO:0002507	tolerance induction	15.4146	0.000926178	0.00680253	Lyn/C3ar1/Tgfb1
							GO:0008360	regulation of cell shape	5.33135	0.000932242	0.00682762	Hexb/Csf1r/Icam1/Rac2/Hck/F11r
							GO:0050878	regulation of body fluid levels	3.58116	0.000953322	0.00696222	Cfh/Fcer1g/Mertk/Lyn/Vwf/Angptl4/Selp/F11r/Ptpn6
							GO:0070371	ERK1 and ERK2 cascade	3.54535	0.00102298	0.00744983	Csf1r/Icam1/Ctsh/Lyn/Tgfb1/C5ar1/Ptprc/Pycard/Ptpn6
							GO:0070527	platelet aggregation	8.91912	0.00103974	0.00747105	Cfh/Lyn/F11r/Ptpn6
							GO:2000401	regulation of lymphocyte migration	8.91912	0.00103974	0.00747105	Lgals9/Dock8/Apod/Pycard
							GO:0098771	inorganic ion homeostasis	2.8534	0.00104207	0.00747105	Hexb/Heph/Ccr5/Lyn/Slco2b1/Cp/Lcn2/Mt1/Tgfb1/Plcg2/Ptprc/Ptpn6
							GO:0000303	response to superoxide	14.7723	0.00105198	0.00747105	Fbln5/Nos3/Ucp2
							GO:0006958	complement activation, classical pathway	14.7723	0.00105198	0.00747105	C1qb/C1qa/C1qc
							GO:0010758	regulation of macrophage chemotaxis	14.7723	0.00105198	0.00747105	Csf1r/C3ar1/C5ar1
							GO:0032689	negative regulation of type II interferon production	14.7723	0.00105198	0.00747105	Pglyrp1/Laptm5/Lgals9
							GO:0043302	positive regulation of leukocyte degranulation	14.7723	0.00105198	0.00747105	Itgb2/Itgam/Fcer1g
							GO:0071800	podosome assembly	14.7723	0.00105198	0.00747105	Bin2/Lcp1/Hck
							GO:0051402	neuron apoptotic process	3.22892	0.00110094	0.0077973	Cx3cr1/Fcgr2b/Ccr5/Lcn2/Mt1/Tgfb1/C5ar1/Ucp2/Ncf2/Ucn
							GO:0002820	negative regulation of adaptive immune response	8.75395	0.00111564	0.00783682	Fcgr2b/Nckap1l/Ptprc/Ptpn6
							GO:0042267	natural killer cell mediated cytotoxicity	8.75395	0.00111564	0.00783682	Lgals9/Tgfb1/Fcgr4/Ptpn6
							GO:0051926	negative regulation of calcium ion transport	8.75395	0.00111564	0.00783682	Icam1/Tgfb1/Nos3/Ucp2
							GO:0046849	bone remodeling	6.35367	0.0011507	0.00806116	Ctss/Csf1r/Tmem119/Rac2/Fcgr4
							GO:0000305	response to oxygen radical	14.1814	0.00118807	0.00825566	Fbln5/Nos3/Ucp2
							GO:0006026	aminoglycan catabolic process	14.1814	0.00118807	0.00825566	Hexb/Pglyrp1/Tgfb1
							GO:1903306	negative regulation of regulated secretory pathway	14.1814	0.00118807	0.00825566	Lgals9/Spi1/Nckap1l
							GO:1905517	macrophage migration	8.59479	0.00119534	0.00828381	Csf1r/Cx3cr1/C3ar1/C5ar1
							GO:0043523	regulation of neuron apoptotic process	3.41995	0.00131462	0.00908606	Cx3cr1/Fcgr2b/Ccr5/Lcn2/Mt1/C5ar1/Ucp2/Ncf2/Ucn
							GO:0002313	mature B cell differentiation involved in immune response	13.636	0.00133478	0.00917616	Spi1/Lfng/Plcg2
							GO:0045730	respiratory burst	13.636	0.00133478	0.00917616	Ncf1/Rac2/Ncf2
							GO:0051051	negative regulation of transport	2.93445	0.0013521	0.00927051	Icam1/Fcgr2b/Lgals9/Spi1/Nckap1l/Apod/Tgfb1/Nos3/Ucp2/Rsad2/Ucn
							GO:0001959	regulation of cytokine-mediated signaling pathway	4.9241	0.00140516	0.00958337	Laptm5/Naip5/Irf7/Ptprc/Parp14/Pycard
							GO:0021782	glial cell development	4.9241	0.00140516	0.00958337	C1qa/Csf1r/Itgam/Lyn/Tgfb1/C5ar1
							GO:0016032	viral process	3.72215	0.0014326	0.00974471	Ifitm3/Icam1/Fam111a/Naip5/Trim30a/Oasl2/Rsad2/Ifit1
							GO:1903900	regulation of viral life cycle	6.0295	0.00145402	0.00986436	Ifitm3/Fam111a/Trim30a/Oasl2/Rsad2
							GO:0043491	phosphatidylinositol 3-kinase/protein kinase B signal transduction	3.36584	0.00146771	0.00993114	Csf1r/Cx3cr1/Mertk/Hcls1/Pecam1/Selp/Tgfb1/Pik3ap1/Ptpn6
							GO:0031664	regulation of lipopolysaccharide-mediated signaling pathway	13.1309	0.0014924	0.0100454	Ly86/Trim30a/Ptpn6
							GO:0060907	positive regulation of macrophage cytokine production	13.1309	0.0014924	0.0100454	Laptm5/Plcg2/Pycard
							GO:0008064	regulation of actin polymerization or depolymerization	4.85664	0.00150787	0.0100968	Icam1/Nckap1l/Hcls1/Pecam1/Capg/Pycard
							GO:0050728	negative regulation of inflammatory response	4.85664	0.00150787	0.0100968	Pglyrp1/Cx3cr1/Fcgr2b/Lgals9/Tnfaip8l2/Ptpn6
							GO:0007229	integrin-mediated signaling pathway	5.90891	0.00159048	0.0106225	Itgb2/Tyrobp/Itgam/Fcer1g/Fyb1
							GO:0051235	maintenance of location	4.11566	0.00160844	0.0107146	Ccr5/Lgals9/Lyn/Tgfb1/Plcg2/Ptprc/Ptpn6
							GO:0030832	regulation of actin filament length	4.79101	0.00161619	0.0107385	Icam1/Nckap1l/Hcls1/Pecam1/Capg/Pycard
							GO:0002534	cytokine production involved in inflammatory response	7.87855	0.00165441	0.0109361	Pld4/Apod/Pycard/Ptpn6
							GO:1900015	regulation of cytokine production involved in inflammatory response	7.87855	0.00165441	0.0109361	Pld4/Apod/Pycard/Ptpn6
							GO:0043304	regulation of mast cell degranulation	12.662	0.00166121	0.010953	Fcer1g/Lyn/Rac2
							GO:0019058	viral life cycle	4.05514	0.00175022	0.0114811	Ifitm3/Icam1/Fam111a/Naip5/Trim30a/Oasl2/Rsad2
							GO:0050870	positive regulation of T cell activation	4.05514	0.00175022	0.0114811	Lgals9/Dock8/Nckap1l/Tgfb1/Ptprc/Icosl/Pycard
							GO:0071385	cellular response to glucocorticoid stimulus	7.7494	0.00175904	0.0115097	Fam107a/Tgfb1/Etnppl/Hmgcs2
							GO:0071404	cellular response to low-density lipoprotein particle stimulus	12.2253	0.00184151	0.0119884	Itgb2/Fcer1g/Tgfb1
							GO:2000406	positive regulation of T cell migration	12.2253	0.00184151	0.0119884	Lgals9/Dock8/Pycard
							GO:0042130	negative regulation of T cell proliferation	7.62441	0.00186818	0.012104	Laptm5/Lgals9/Tgfb1/Ptpn6
							GO:0006816	calcium ion transport	3.00708	0.00186865	0.012104	Icam1/Ccr5/Lyn/Tgfb1/Nos3/Ucp2/Plcg2/Ptprc/Ucn/Ptpn6
							GO:0060760	positive regulation of response to cytokine stimulus	7.50338	0.00198193	0.0128055	Laptm5/Irf7/Parp14/Rigi
							GO:0055094	response to lipoprotein particle	11.8178	0.00203356	0.0131063	Itgb2/Fcer1g/Tgfb1
							GO:0009636	response to toxic substance	3.93928	0.00206284	0.0132618	Fbln5/Lyn/Gpx3/Cp/Lcn2/Mt1/Nos3
							GO:0032722	positive regulation of chemokine production	7.38614	0.00210038	0.0134696	Csf1r/Lgals9/Tgfb1/Pycard
							GO:0016525	negative regulation of angiogenesis	5.52235	0.00214292	0.0137083	Cx3cr1/Fbln5/Sparc/Stab1/Ptpn6
							GO:1903409	reactive oxygen species biosynthetic process	7.27251	0.00222363	0.0141894	Ncf1/Lcn2/Plcg2/Ncf2
							GO:0050858	negative regulation of antigen receptor-mediated signaling pathway	11.4366	0.00223762	0.0142083	Laptm5/Lyn/Ptpn6
							GO:0150077	regulation of neuroinflammatory response	11.4366	0.00223762	0.0142083	Csf1r/Ctsc/Plcg2
							GO:0070372	regulation of ERK1 and ERK2 cascade	3.4631	0.00225119	0.0142594	Csf1r/Icam1/Lyn/Tgfb1/C5ar1/Ptprc/Pycard/Ptpn6
							GO:2000181	negative regulation of blood vessel morphogenesis	5.42102	0.00232365	0.0146823	Cx3cr1/Fbln5/Sparc/Stab1/Ptpn6
							GO:0045069	regulation of viral genome replication	7.16232	0.00235178	0.0148237	Ifitm3/Fam111a/Oasl2/Rsad2
							GO:0097696	cell surface receptor signaling pathway via STAT	5.37174	0.00241807	0.0151673	Csf1r/Csf2rb/Stra6/Tgfb1/Ptprc
							GO:1901343	negative regulation of vasculature development	5.37174	0.00241807	0.0151673	Cx3cr1/Fbln5/Sparc/Stab1/Ptpn6
							GO:0002548	monocyte chemotaxis	11.0792	0.00245395	0.0152809	Cx3cr1/Lyn/Ccl12
							GO:0033032	regulation of myeloid cell apoptotic process	11.0792	0.00245395	0.0152809	Fcgr2b/Ccr5/Fcer1g
							GO:0046006	regulation of activated T cell proliferation	11.0792	0.00245395	0.0152809	Laptm5/Icosl/Pycard
							GO:0097553	calcium ion transmembrane import into cytosol	4.40416	0.00247137	0.0153523	Ccr5/Lyn/Tgfb1/Plcg2/Ptprc/Ptpn6
							GO:0030316	osteoclast differentiation	5.32335	0.00251524	0.0155872	Csf1r/Tyrobp/Fcer1g/Spi1/Tgfb1
							GO:0009746	response to hexose	3.79472	0.00254504	0.0157206	Icam1/Ncf1/Lcn2/Tgfb1/Ucp2/Ncf2/Slc2a5
							GO:0045766	positive regulation of angiogenesis	4.37697	0.00254896	0.0157206	Itgb2/Cx3cr1/C3ar1/C5ar1/Nos3/Ptpn6
							GO:0097191	extrinsic apoptotic signaling pathway	3.76022	0.00267814	0.0163892	Icam1/Cx3cr1/Spi1/Lcn2/Tgfb1/Ptprc/Pycard
							GO:0001914	regulation of T cell mediated cytotoxicity	10.7435	0.00268279	0.0163892	Nckap1l/Ptprc/H2-K1
							GO:0002335	mature B cell differentiation	10.7435	0.00268279	0.0163892	Spi1/Lfng/Plcg2
							GO:2000178	negative regulation of neural precursor cell proliferation	10.7435	0.00268279	0.0163892	Ccr5/Spint1/Tgfb1
							GO:0051924	regulation of calcium ion transport	3.7432	0.00274667	0.0167009	Icam1/Lyn/Tgfb1/Nos3/Ucp2/Ucn/Ptpn6
							GO:0030003	intracellular monoatomic cation homeostasis	2.68033	0.00274678	0.0167009	Hexb/Ccr5/Lyn/Slco2b1/Cp/Lcn2/Mt1/Tgfb1/Plcg2/Ptprc/Ptpn6
							GO:0071384	cellular response to corticosteroid stimulus	6.85092	0.0027666	0.0167819	Fam107a/Tgfb1/Etnppl/Hmgcs2
							GO:0043269	regulation of monoatomic ion transport	2.84767	0.00277413	0.0167881	Ctss/Icam1/Heph/Lyn/Lcn2/Tgfb1/Nos3/Ucp2/Ucn/Ptpn6
							GO:0010959	regulation of metal ion transport	3.05634	0.00282101	0.0170318	Icam1/Heph/Lyn/Lcn2/Tgfb1/Nos3/Ucp2/Ucn/Ptpn6
							GO:0071260	cellular response to mechanical stimulus	6.75305	0.00291532	0.0174997	Pecam1/Tgfb1/Nos3/F11r
							GO:0098869	cellular oxidant detoxification	6.75305	0.00291532	0.0174997	Fbln5/Gpx3/Cp/Nos3
							GO:0071354	cellular response to interleukin-6	10.4275	0.00292438	0.0174997	Spi1/Selp/Lcn2
							GO:0035710	CD4-positive, alpha-beta T cell activation	5.13819	0.00293246	0.0174997	Lgals9/Nckap1l/Tgfb1/Icosl/Rsad2
							GO:0098754	detoxification	5.13819	0.00293246	0.0174997	Fbln5/Gpx3/Cp/Mt1/Nos3
							GO:0001781	neutrophil apoptotic process	23.6357	0.00305829	0.0177573	Fcgr2b/Itgam
							GO:0002323	natural killer cell activation involved in immune response	23.6357	0.00305829	0.0177573	Lgals9/Fcgr4
							GO:0002732	positive regulation of dendritic cell cytokine production	23.6357	0.00305829	0.0177573	Plcg2/Rigi
							GO:0002887	negative regulation of myeloid leukocyte mediated immunity	23.6357	0.00305829	0.0177573	Cx3cr1/Spi1
							GO:0033212	iron import into cell	23.6357	0.00305829	0.0177573	Slco2b1/Lcn2
							GO:0043320	natural killer cell degranulation	23.6357	0.00305829	0.0177573	Lgals9/Fcgr4
							GO:0043383	negative T cell selection	23.6357	0.00305829	0.0177573	Dock2/Ptprc
							GO:0045060	negative thymic T cell selection	23.6357	0.00305829	0.0177573	Dock2/Ptprc
							GO:0045588	positive regulation of gamma-delta T cell differentiation	23.6357	0.00305829	0.0177573	Nckap1l/Ptprc
							GO:0046645	positive regulation of gamma-delta T cell activation	23.6357	0.00305829	0.0177573	Nckap1l/Ptprc
							GO:0072683	T cell extravasation	23.6357	0.00305829	0.0177573	Icam1/F11r
							GO:0110088	hippocampal neuron apoptotic process	23.6357	0.00305829	0.0177573	Cx3cr1/Lcn2
							GO:0043542	endothelial cell migration	3.66039	0.00310977	0.0180157	Itgb2/Sparc/Pecam1/Lcn2/Tgfb1/Nos3/Mmrn2
							GO:0031589	cell-substrate adhesion	3.00453	0.00315979	0.0182118	Fam107a/Itgb2/Itgam/Mertk/Vwf/Apod/Rac2/Pecam1/Myo1g
							GO:0006873	intracellular monoatomic ion homeostasis	2.6315	0.00316089	0.0182118	Hexb/Ccr5/Lyn/Slco2b1/Cp/Lcn2/Mt1/Tgfb1/Plcg2/Ptprc/Ptpn6
							GO:0032814	regulation of natural killer cell activation	10.1296	0.00317894	0.0182118	Pglyrp1/Tyrobp/Lgals9
							GO:0034121	regulation of toll-like receptor signaling pathway	10.1296	0.00317894	0.0182118	Irf7/Pik3ap1/Trim30a
							GO:0071402	cellular response to lipoprotein particle stimulus	10.1296	0.00317894	0.0182118	Itgb2/Fcer1g/Tgfb1
							GO:0071496	cellular response to external stimulus	6.56546	0.00322898	0.0184574	Pecam1/Tgfb1/Nos3/F11r
							GO:0050868	negative regulation of T cell activation	5.00755	0.00327665	0.0186885	Laptm5/Lgals9/Tnfaip8l2/Tgfb1/Ptpn6
							GO:0008015	blood circulation	2.61562	0.00330961	0.0188348	Icam1/Cfh/Pecam1/C3ar1/Tgfb1/Nos3/F11r/Ncf2/Slc2a5/Ucn/Fli1
							GO:2000403	positive regulation of lymphocyte migration	9.84819	0.00344669	0.0195717	Lgals9/Dock8/Pycard
							GO:1903531	negative regulation of secretion by cell	4.07511	0.00362956	0.0205648	Lgals9/Spi1/Nckap1l/Ucp2/Rsad2/Ucn
							GO:0002713	negative regulation of B cell mediated immunity	21.487	0.00371725	0.0208468	Fcgr2b/Ptpn6
							GO:0002890	negative regulation of immunoglobulin mediated immune response	21.487	0.00371725	0.0208468	Fcgr2b/Ptpn6
							GO:0044351	macropinocytosis	21.487	0.00371725	0.0208468	Dock2/Pycard
							GO:1900426	positive regulation of defense response to bacterium	21.487	0.00371725	0.0208468	Lgals9/Mmrn2
							GO:0014002	astrocyte development	9.58202	0.00372784	0.0208468	C1qa/Csf1r/C5ar1
							GO:0045920	negative regulation of exocytosis	9.58202	0.00372784	0.0208468	Lgals9/Spi1/Nckap1l
							GO:0043368	positive T cell selection	9.32987	0.0040226	0.022398	Dock2/Tgfb1/Ptprc
							GO:0070741	response to interleukin-6	9.32987	0.0040226	0.022398	Spi1/Selp/Lcn2
							GO:0007200	phospholipase C-activating G protein-coupled receptor signaling pathway	4.76525	0.0040509	0.0224869	Cx3cr1/C3ar1/C5ar1/Sele/Gna15
							GO:0062207	regulation of pattern recognition receptor signaling pathway	3.98354	0.00405601	0.0224869	Lyn/Plcg2/Irf7/Pik3ap1/Trim30a/Rsad2
							GO:0002220	innate immune response activating cell surface receptor signaling pathway	6.13913	0.00411214	0.0227491	Tyrobp/Lyn/Plcg2/Pik3ap1
							GO:1904062	regulation of monoatomic cation transmembrane transport	3.47583	0.00413101	0.0228046	Ctss/Heph/Lyn/Lcn2/Tgfb1/Ucp2/Ptpn6
							GO:2000177	regulation of neural precursor cell proliferation	4.72713	0.00419161	0.0230897	Cx3cr1/Ccr5/Lyn/Spint1/Tgfb1
							GO:0022408	negative regulation of cell-cell adhesion	3.93928	0.00428266	0.0235409	Laptm5/Lgals9/Tnfaip8l2/Spi1/Tgfb1/Ptpn6
							GO:1905314	semi-lunar valve development	9.09064	0.00433115	0.0237318	Stra6/Tgfb1/Nos3
							GO:0045621	positive regulation of lymphocyte differentiation	4.68961	0.00433579	0.0237318	Lgals9/Spi1/Nckap1l/Tgfb1/Ptprc
							GO:0001878	response to yeast	19.6964	0.00443607	0.0240762	Ncf1/Plcg2
							GO:0035771	interleukin-4-mediated signaling pathway	19.6964	0.00443607	0.0240762	Ptprc/Parp14
							GO:0090557	establishment of endothelial intestinal barrier	19.6964	0.00443607	0.0240762	Icam1/F11r
							GO:1901678	iron coordination entity transport	19.6964	0.00443607	0.0240762	Slco2b1/Lcn2
							GO:0034109	homotypic cell-cell adhesion	5.98371	0.00450691	0.0244093	Cfh/Lyn/F11r/Ptpn6
							GO:0070374	positive regulation of ERK1 and ERK2 cascade	3.89599	0.00451853	0.0244209	Csf1r/Icam1/Tgfb1/C5ar1/Ptprc/Pycard
							GO:0007157	heterophilic cell-cell adhesion via plasma membrane cell adhesion molecules	8.86337	0.00465368	0.0250463	Lgals9/Selp/Sele
							GO:0030890	positive regulation of B cell proliferation	8.86337	0.00465368	0.0250463	Nckap1l/Cdkn1a/Ptprc
							GO:0006809	nitric oxide biosynthetic process	5.90891	0.00471354	0.0253157	Itgb2/Icam1/Cx3cr1/Nos3
							GO:1903038	negative regulation of leukocyte cell-cell adhesion	4.58055	0.00478954	0.0256703	Laptm5/Lgals9/Tnfaip8l2/Tgfb1/Ptpn6
							GO:0002709	regulation of T cell mediated immunity	5.83597	0.00492646	0.0263494	Nckap1l/Ptprc/H2-K1/Rsad2
							GO:0043583	ear development	3.3628	0.00494129	0.026374	C1qb/Igfbp7/Sparc/Stra6/Tgfb1/H2-K1/Cebpd
							GO:0045124	regulation of bone resorption	8.64719	0.00499038	0.0264716	Csf1r/Tmem119/Fcgr4
							GO:0046633	alpha-beta T cell proliferation	8.64719	0.00499038	0.0264716	Lgals9/Dock2/Ptprc
							GO:1905332	positive regulation of morphogenesis of an epithelium	8.64719	0.00499038	0.0264716	Lcn2/Tgfb1/Mmrn2
							GO:0032609	type II interferon production	5.76479	0.00514574	0.0270441	Pglyrp1/Laptm5/Lgals9/Pycard
							GO:0032649	regulation of type II interferon production	5.76479	0.00514574	0.0270441	Pglyrp1/Laptm5/Lgals9/Pycard
							GO:0042102	positive regulation of T cell proliferation	5.76479	0.00514574	0.0270441	Nckap1l/Ptprc/Icosl/Pycard
							GO:0001767	establishment of lymphocyte polarity	18.1813	0.0052137	0.0270441	Dock8/Dock2
							GO:0001768	establishment of T cell polarity	18.1813	0.0052137	0.0270441	Dock8/Dock2
							GO:0002291	T cell activation via T cell receptor contact with antigen bound to MHC molecule on antigen presenting cell	18.1813	0.0052137	0.0270441	Icam1/Tyrobp
							GO:0045059	positive thymic T cell selection	18.1813	0.0052137	0.0270441	Dock2/Ptprc
							GO:0045586	regulation of gamma-delta T cell differentiation	18.1813	0.0052137	0.0270441	Nckap1l/Ptprc
							GO:0046643	regulation of gamma-delta T cell activation	18.1813	0.0052137	0.0270441	Nckap1l/Ptprc
							GO:0060368	regulation of Fc receptor mediated stimulatory signaling pathway	18.1813	0.0052137	0.0270441	Lyn/Ptprc
							GO:1903238	positive regulation of leukocyte tethering or rolling	18.1813	0.0052137	0.0270441	Selp/Sele
							GO:0008217	regulation of blood pressure	3.77165	0.0052838	0.0272979	C3ar1/Nos3/F11r/Ncf2/Slc2a5/Ucn
							GO:0051651	maintenance of location in cell	3.77165	0.0052838	0.0272979	Ccr5/Lyn/Tgfb1/Plcg2/Ptprc/Ptpn6
							GO:0033628	regulation of cell adhesion mediated by integrin	8.44131	0.00534141	0.0274854	Nckap1l/Lyn/Ptpn6
							GO:0140894	endolysosomal toll-like receptor signaling pathway	8.44131	0.00534141	0.0274854	Tlr13/Pik3ap1/Rsad2
							GO:0032271	regulation of protein polymerization	3.75169	0.00542005	0.0278344	Icam1/Nckap1l/Hcls1/Pecam1/Capg/Pycard
							GO:0032479	regulation of type I interferon production	4.44279	0.00544576	0.0278555	Tyrobp/Plcg2/Irf7/Pycard/Rigi
							GO:0032606	type I interferon production	4.44279	0.00544576	0.0278555	Tyrobp/Plcg2/Irf7/Pycard/Rigi
							GO:0051048	negative regulation of secretion	3.73195	0.00555885	0.0283776	Lgals9/Spi1/Nckap1l/Ucp2/Rsad2/Ucn
							GO:0045824	negative regulation of innate immune response	5.62754	0.00560374	0.0285503	Lgals9/Tgfb1/Parp14/Ptpn6
							GO:0042063	gliogenesis	2.72022	0.00601902	0.0303397	C1qa/Hexb/Csf1r/Cx3cr1/Itgam/Lyn/Spint1/Tgfb1/C5ar1
							GO:0001771	immunological synapse formation	16.8826	0.00604911	0.0303397	Dock8/Dock2
							GO:0002755	MyD88-dependent toll-like receptor signaling pathway	16.8826	0.00604911	0.0303397	Tlr13/Irf7
							GO:0002921	negative regulation of humoral immune response	16.8826	0.00604911	0.0303397	Fcgr2b/Ptpn6
							GO:0016045	detection of bacterium	16.8826	0.00604911	0.0303397	Pglyrp1/Naip5
							GO:0032823	regulation of natural killer cell differentiation	16.8826	0.00604911	0.0303397	Pglyrp1/Lgals9
							GO:0033690	positive regulation of osteoblast proliferation	16.8826	0.00604911	0.0303397	Tmem119/Fbln5
							GO:0060263	regulation of respiratory burst	16.8826	0.00604911	0.0303397	Ncf1/Rac2
							GO:0050856	regulation of T cell receptor signaling pathway	8.05761	0.00608713	0.0303586	Laptm5/Ptprc/Ptpn6
							GO:0046209	nitric oxide metabolic process	5.49666	0.00608821	0.0303586	Itgb2/Icam1/Cx3cr1/Nos3
							GO:0140888	interferon-mediated signaling pathway	5.49666	0.00608821	0.0303586	Ifitm3/Irf7/Parp14/Oasl2
							GO:0044403	biological process involved in symbiotic interaction	4.31308	0.00616319	0.0306732	Pglyrp1/Icam1/Ncf1/Naip5/Trim30a
							GO:0048771	tissue remodeling	3.63626	0.00629221	0.0312549	Ctss/Csf1r/Tmem119/Rac2/Nos3/Fcgr4
							GO:0043303	mast cell degranulation	7.87855	0.00648211	0.0321363	Fcer1g/Lyn/Rac2
							GO:0014015	positive regulation of gliogenesis	5.37174	0.00659978	0.0325943	Csf1r/Lyn/Spint1/Tgfb1
							GO:2001057	reactive nitrogen species metabolic process	5.37174	0.00659978	0.0325943	Itgb2/Icam1/Cx3cr1/Nos3
							GO:0110053	regulation of actin filament organization	3.16953	0.00677664	0.0334038	Icam1/Nckap1l/Hcls1/Pecam1/F11r/Capg/Pycard
							GO:0034765	regulation of monoatomic ion transmembrane transport	3.15744	0.00691484	0.0335105	Ctss/Heph/Lyn/Lcn2/Tgfb1/Ucp2/Ptpn6
							GO:0010832	negative regulation of myotube differentiation	15.7571	0.00694127	0.0335105	Csf1r/Tmem119
							GO:0030214	hyaluronan catabolic process	15.7571	0.00694127	0.0335105	Hexb/Tgfb1
							GO:0030852	regulation of granulocyte differentiation	15.7571	0.00694127	0.0335105	C1qc/Hcls1
							GO:0032693	negative regulation of interleukin-10 production	15.7571	0.00694127	0.0335105	Tyrobp/Fcgr2b
							GO:0032700	negative regulation of interleukin-17 production	15.7571	0.00694127	0.0335105	Nckap1l/Tgfb1
							GO:0034134	toll-like receptor 2 signaling pathway	15.7571	0.00694127	0.0335105	Lyn/Pik3ap1
							GO:0042492	gamma-delta T cell differentiation	15.7571	0.00694127	0.0335105	Nckap1l/Ptprc
							GO:0070486	leukocyte aggregation	15.7571	0.00694127	0.0335105	Cfh/Rac2
							GO:0071801	regulation of podosome assembly	15.7571	0.00694127	0.0335105	Lcp1/Hck
							GO:0098543	detection of other organism	15.7571	0.00694127	0.0335105	Pglyrp1/Naip5
							GO:0030522	intracellular receptor signaling pathway	2.65238	0.00705936	0.0340169	Plcg2/Tlr13/Irf7/Pik3ap1/Trim30a/Rsad2/Pycard/Rigi/Ptpn6
							GO:0019079	viral genome replication	5.25237	0.0071391	0.0343369	Ifitm3/Fam111a/Oasl2/Rsad2
							GO:0002448	mast cell mediated immunity	7.5433	0.00731705	0.0351273	Fcer1g/Lyn/Rac2
							GO:0043367	CD4-positive, alpha-beta T cell differentiation	5.19465	0.00741935	0.0355522	Nckap1l/Tgfb1/Icosl/Rsad2
							GO:0007259	cell surface receptor signaling pathway via JAK-STAT	5.13819	0.00770677	0.036861	Csf1r/Csf2rb/Stra6/Ptprc
							GO:1903426	regulation of reactive oxygen species biosynthetic process	7.38614	0.00775727	0.0370338	Lcn2/Plcg2/Ncf2
							GO:0051258	protein polymerization	3.08675	0.00778858	0.0371145	Fam107a/Icam1/Nckap1l/Hcls1/Pecam1/Capg/Pycard
							GO:0001820	serotonin secretion	14.7723	0.0078892	0.0371816	Fcgr3/Fcer1g
							GO:0002371	dendritic cell cytokine production	14.7723	0.0078892	0.0371816	Plcg2/Rigi
							GO:0002730	regulation of dendritic cell cytokine production	14.7723	0.0078892	0.0371816	Plcg2/Rigi
							GO:0034162	toll-like receptor 9 signaling pathway	14.7723	0.0078892	0.0371816	Pik3ap1/Rsad2
							GO:0045651	positive regulation of macrophage differentiation	14.7723	0.0078892	0.0371816	Hcls1/Tgfb1
							GO:1900424	regulation of defense response to bacterium	14.7723	0.0078892	0.0371816	Lgals9/Mmrn2
							GO:0022604	regulation of cell morphogenesis	3.06388	0.00809722	0.0380924	Hexb/Csf1r/Icam1/Sparc/Rac2/Hck/F11r
							GO:0030838	positive regulation of actin filament polymerization	7.23541	0.00821282	0.0382869	Icam1/Nckap1l/Pycard
							GO:0045058	T cell selection	7.23541	0.00821282	0.0382869	Dock2/Tgfb1/Ptprc
							GO:0045646	regulation of erythrocyte differentiation	7.23541	0.00821282	0.0382869	Spi1/Nckap1l/Lyn
							GO:0061028	establishment of endothelial barrier	7.23541	0.00821282	0.0382869	Icam1/Pecam1/F11r
							GO:2000351	regulation of endothelial cell apoptotic process	7.23541	0.00821282	0.0382869	Icam1/Angptl4/Tgfb1
							GO:0048678	response to axon injury	5.02886	0.00830339	0.0386393	Tyrobp/Lyn/Apod/Plcg2
							GO:0031334	positive regulation of protein-containing complex assembly	3.40899	0.00852638	0.0396054	Icam1/Lcp1/Nckap1l/Tgfb1/Plcg2/Pycard
							GO:0032102	negative regulation of response to external stimulus	2.7644	0.00861884	0.0399629	Pglyrp1/Cx3cr1/Fcgr2b/Lgals9/Tnfaip8l2/Tgfb1/Parp14/Ptpn6
							GO:0002204	somatic recombination of immunoglobulin genes involved in immune response	7.0907	0.00868381	0.0399766	Tgfb1/Ptprc/Icosl
							GO:0002208	somatic diversification of immunoglobulins involved in immune response	7.0907	0.00868381	0.0399766	Tgfb1/Ptprc/Icosl
							GO:0045190	isotype switching	7.0907	0.00868381	0.0399766	Tgfb1/Ptprc/Icosl
							GO:0046850	regulation of bone remodeling	7.0907	0.00868381	0.0399766	Csf1r/Tmem119/Fcgr4
							GO:0043524	negative regulation of neuron apoptotic process	3.39268	0.00871904	0.0400672	Cx3cr1/Lcn2/Mt1/C5ar1/Ucp2/Ucn
							GO:0002327	immature B cell differentiation	13.9033	0.00889188	0.0401051	Laptm5/Spi1
							GO:0002523	leukocyte migration involved in inflammatory response	13.9033	0.00889188	0.0401051	Itgb2/Itgam
							GO:0002716	negative regulation of natural killer cell mediated immunity	13.9033	0.00889188	0.0401051	Lgals9/Tgfb1
							GO:0015721	bile acid and bile salt transport	13.9033	0.00889188	0.0401051	Slco2b1/Abcc3
							GO:0043011	myeloid dendritic cell differentiation	13.9033	0.00889188	0.0401051	Spi1/Tgfb1
							GO:0045579	positive regulation of B cell differentiation	13.9033	0.00889188	0.0401051	Spi1/Nckap1l
							GO:0045591	positive regulation of regulatory T cell differentiation	13.9033	0.00889188	0.0401051	Lgals9/Tgfb1
							GO:0045953	negative regulation of natural killer cell mediated cytotoxicity	13.9033	0.00889188	0.0401051	Lgals9/Tgfb1
							GO:0060143	positive regulation of syncytium formation by plasma membrane fusion	13.9033	0.00889188	0.0401051	Tyrobp/Cd53
							GO:1903236	regulation of leukocyte tethering or rolling	13.9033	0.00889188	0.0401051	Selp/Sele
							GO:0032481	positive regulation of type I interferon production	4.9241	0.00892954	0.0401051	Tyrobp/Plcg2/Irf7/Rigi
							GO:0051851	host-mediated perturbation of symbiont process	4.9241	0.00892954	0.0401051	Csf1r/Ifitm3/Cx3cr1/Trim30a
							GO:0070167	regulation of biomineral tissue development	4.9241	0.00892954	0.0401051	Csf1r/Tmem119/Tgfb1/Nos3
							GO:0030218	erythrocyte differentiation	3.93928	0.00895191	0.0401357	Spi1/Nckap1l/Lyn/Hcls1/Rac2
							GO:0010803	regulation of tumor necrosis factor-mediated signaling pathway	6.95166	0.00917037	0.0410438	Laptm5/Naip5/Pycard
							GO:1990748	cellular detoxification	4.87333	0.00925386	0.0413456	Fbln5/Gpx3/Cp/Nos3
							GO:0061351	neural precursor cell proliferation	3.32897	0.00952104	0.0424658	Cx3cr1/Ccr5/Lyn/Spint1/Tgfb1/C5ar1
							GO:0002377	immunoglobulin production	4.8236	0.00958576	0.0425337	Fcgr2b/Tgfb1/Ptprc/Icosl
							GO:0070555	response to interleukin-1	4.8236	0.00958576	0.0425337	Lcn2/Saa3/Sele/Pycard
							GO:1902106	negative regulation of leukocyte differentiation	4.8236	0.00958576	0.0425337	C1qc/Pglyrp1/Lyn/Tmem176a
							GO:0003179	heart valve morphogenesis	6.81798	0.00967258	0.0427717	Stra6/Tgfb1/Nos3
							GO:0006826	iron ion transport	6.81798	0.00967258	0.0427717	Heph/Slco2b1/Lcn2
							GO:0009612	response to mechanical stimulus	3.31341	0.00972951	0.0429498	Pecam1/Stra6/Tgfb1/Nos3/F11r/Ucn
							GO:0048839	inner ear development	3.298	0.00994121	0.0436171	C1qb/Igfbp7/Sparc/Tgfb1/H2-K1/Cebpd
							GO:0030540	female genitalia development	13.1309	0.00994835	0.0436171	Mertk/Stra6
							GO:0033630	positive regulation of cell adhesion mediated by integrin	13.1309	0.00994835	0.0436171	Nckap1l/Ptpn6
							GO:0043117	positive regulation of vascular permeability	13.1309	0.00994835	0.0436171	Tgfb1/Ucn
							GO:0002381	immunoglobulin production involved in immunoglobulin-mediated immune response	6.68934	0.0101906	0.0443023	Tgfb1/Ptprc/Icosl
							GO:0032623	interleukin-2 production	6.68934	0.0101906	0.0443023	Laptm5/Plcg2/Ptprc
							GO:0032663	regulation of interleukin-2 production	6.68934	0.0101906	0.0443023	Laptm5/Plcg2/Ptprc
							GO:0044546	NLRP3 inflammasome complex assembly	6.68934	0.0101906	0.0443023	Plcg2/Trim30a/Pycard
							GO:0045687	positive regulation of glial cell differentiation	6.68934	0.0101906	0.0443023	Csf1r/Spint1/Tgfb1
							GO:0007204	positive regulation of cytosolic calcium ion concentration	3.8122	0.0102248	0.0443762	Cx3cr1/Ccr5/C3ar1/C5ar1/Plcg2
							GO:0046634	regulation of alpha-beta T cell activation	4.72713	0.0102726	0.0445089	Lgals9/Nckap1l/Tgfb1/Ptprc
							GO:0022411	cellular component disassembly	2.47926	0.0107132	0.046156	C1qb/C1qa/Ctss/C1qc/Cx3cr1/Itgam/Lcp1/Rac2/Capg
							GO:0000768	syncytium formation by plasma membrane fusion	6.56546	0.0107244	0.046156	Tyrobp/Dock2/Cd53
							GO:0010332	response to gamma radiation	6.56546	0.0107244	0.046156	Cdkn1a/Tgfb1/Ptprc
							GO:0140253	cell-cell fusion	6.56546	0.0107244	0.046156	Tyrobp/Dock2/Cd53
							GO:0006874	intracellular calcium ion homeostasis	2.89248	0.0109011	0.0468385	Hexb/Ccr5/Lyn/Tgfb1/Plcg2/Ptprc/Ptpn6
							GO:0002577	regulation of antigen processing and presentation	12.4398	0.0110576	0.0469631	Ctss/Pycard
							GO:0003184	pulmonary valve morphogenesis	12.4398	0.0110576	0.0469631	Stra6/Nos3
							GO:0019430	removal of superoxide radicals	12.4398	0.0110576	0.0469631	Fbln5/Nos3
							GO:0036336	dendritic cell migration	12.4398	0.0110576	0.0469631	Dock8/Spi1
							GO:0046629	gamma-delta T cell activation	12.4398	0.0110576	0.0469631	Nckap1l/Ptprc
							GO:0051895	negative regulation of focal adhesion assembly	12.4398	0.0110576	0.0469631	Fam107a/Apod
							GO:0150118	negative regulation of cell-substrate junction organization	12.4398	0.0110576	0.0469631	Fam107a/Apod
							GO:0070588	calcium ion transmembrane transport	2.8824	0.0110971	0.0470532	Ccr5/Lyn/Tgfb1/Ucp2/Plcg2/Ptprc/Ptpn6
							GO:0072577	endothelial cell apoptotic process	6.44609	0.0112741	0.047676	Icam1/Angptl4/Tgfb1
							GO:0030324	lung development	3.20846	0.011281	0.047676	Ctsh/Sparc/Stra6/Tgfb1/Nos3/Hmgcs2
							GO:0001889	liver development	3.7163	0.0113286	0.0477989	Vwf/Cp/Tgfb1/Ucp2/Hmgcs2
							GO:0035821	modulation of process of another organism	4.58945	0.0113614	0.0478591	Csf1r/Ifitm3/Cx3cr1/Trim30a
							GO:0060348	bone development	3.19401	0.0115161	0.0484315	Tmem119/Tyrobp/Fbln5/Sparc/Tgfb1/Ptprc
							GO:1903707	negative regulation of hemopoiesis	4.54532	0.0117402	0.0492937	C1qc/Pglyrp1/Lyn/Tmem176a
							GO:0002711	positive regulation of T cell mediated immunity	6.33098	0.0118399	0.0494704	Ptprc/H2-K1/Rsad2
							GO:0006949	syncytium formation	6.33098	0.0118399	0.0494704	Tyrobp/Dock2/Cd53
							GO:1900271	regulation of long-term synaptic potentiation	6.33098	0.0118399	0.0494704	Fam107a/Tyrobp/Cx3cr1
							GO:0010001	glial cell differentiation	2.84278	0.0119068	0.0496695	C1qa/Csf1r/Itgam/Lyn/Spint1/Tgfb1/C5ar1
							GO:0030323	respiratory tube development	3.16549	0.0119967	0.0498831	Ctsh/Sparc/Stra6/Tgfb1/Nos3/Hmgcs2
							GO:1903828	negative regulation of protein localization	3.16549	0.0119967	0.0498831	Spi1/Apod/Tgfb1/Ucp2/Abi3/Rsad2
