# Supplementary material
Source: Research Square preprint supplement (doi:10.21203/rs.3.rs-10072088/v1)
Supplement: Supplementary file 7 [file 7595b726f0441a525a8bba26.xlsx]

## Sheet: GO-BP_UpDEG_by_LPS
Ctrl mice: Microfglia Up-DEGs by LPS							GWI mice: Microglia Up-DEGs by LPS
ID	Description	FoldEnrichment	pvalue	p.adjust	geneID		ID	Description	FoldEnrichment	pvalue	p.adjust	geneID
GO:0042254	ribosome biogenesis	3.97252	3.28743e-40	1.6378e-36	Wdr12/Spout1/Grwd1/Noc4l/Ltv1/Ppan/Tbl3/Nop56/Utp4/Rrs1/Nop16/Wdr55/Rrp9/Ftsj3/Wdr46/Nop58/Aatf/Ebna1bp2/Ddx56/Ddx21/Utp18/Bop1/Fbl/Wdr75/Rrp15/Mrto4/Nob1/Utp14a/Eif5b/Pno1/Exosc2/Pak1ip1/Gtf3a/C1qbp/Nhp2/Nop2/Nop14/Dkc1/Rpl14/Bysl/Rpp40/Rps8/Usp36/Noa1/Mak16/Rplp0/Rcc1l/Ncl/Pa2g4/Noc2l/Rpsa/Mphosph10/Nop9/Pes1/Ddx49/Rrp1/Lsg1/Gtpbp4/Wdr18/Nle1/Tsr3/Lyar/Exosc8/Gar1/Pwp2/Nsun5/Nop53/Npm1/Rrp7a/Rc…		GO:0042254	ribosome biogenesis	4.25298	4.6284e-27	2.13647e-23	Ftsj3/Ppan/Spout1/Nop56/Utp4/Grwd1/Wdr46/Tbl3/Noc2l/Aatf/Wdr12/Wdr75/Usp36/Ltv1/Suv39h1/Ddx21/Rrn3/Heatr3/Nop2/Wdr43/Dis3/Noa1/Nop14/Pwp2/Nop58/Heatr1/Rrp9/Bop1/Rrs1/Sdad1/Ddx54/Xpo1/Wdr3/Noc4l/Exosc2/Wdr36/Ddx27/Dkc1/Mybbp1a/Ddx51/Nop16/Mphosph10/Bysl/Gnl2/Nat10/Rrp7a/Mrto4/Chd7/Ddx56/Las1l/Rcc1l/Lsg1/Nsun5/Nol9/Nop9/Ncl/Utp18/Nol6/Nom1/Nol11/Pes1/Tsr1/Utp14a/Ddx10/Nob1/Ipo4/Utp6/Pa2g4/Dhx30/Kri…
GO:0022613	ribonucleoprotein complex biogenesis	3.31193	4.81554e-38	1.19955e-34	Wdr12/Spout1/Grwd1/Noc4l/Ltv1/Ppan/Tbl3/Nop56/Utp4/Rrs1/Nop16/Wdr55/Rrp9/Ftsj3/Wdr46/Nop58/Aatf/Ebna1bp2/Prmt5/Ddx56/Ddx21/Utp18/Eif3a/Bop1/Fbl/Wdr75/Rrp15/Eif3l/Mrto4/Nob1/Utp14a/Eif5b/Pno1/Exosc2/Pak1ip1/Gtf3a/C1qbp/Nhp2/Nop2/Ruvbl2/Lsm4/Nop14/Prpf31/Dkc1/Rpl14/Bysl/Rpp40/Rps8/Usp36/Noa1/Eif4b/Mak16/Rplp0/Rcc1l/Ncl/Pa2g4/Noc2l/Rpsa/Mphosph10/Nop9/Prmt7/Pes1/Ddx49/Rrp1/Nopchap1/Eif3g/Lsg1/Gtpbp4…		GO:0022613	ribonucleoprotein complex biogenesis	3.45078	1.26022e-24	2.90858e-21	Ftsj3/Ppan/Spout1/Nop56/Utp4/Grwd1/Wdr46/Tbl3/Noc2l/Aatf/Prmt5/Wdr12/Wdr75/Usp36/Ltv1/Suv39h1/Ddx21/Rrn3/Heatr3/Nopchap1/Nop2/Wdr43/Dis3/Noa1/Nop14/Pwp2/Nop58/Heatr1/Rrp9/Bop1/Rrs1/Sdad1/Ddx54/Xpo1/Eif3b/Wdr3/Noc4l/Exosc2/Wdr36/Ddx27/Dkc1/Mybbp1a/Ncbp1/Ddx51/Nop16/Mphosph10/Shq1/Bysl/Gnl2/Nat10/Rrp7a/Mrto4/Chd7/Ddx56/Las1l/Rcc1l/Lsg1/Nsun5/Wdr77/Nol9/Nop9/Ncl/Utp18/Eif3l/Nol6/Nom1/Nol11/Pes1/Eif3…
GO:0006364	rRNA processing	4.01936	1.337e-28	2.22031e-25	Wdr12/Spout1/Ppan/Tbl3/Utp4/Rrs1/Wdr55/Rrp9/Ftsj3/Wdr46/Ebna1bp2/Ddx56/Ddx21/Utp18/Bop1/Fbl/Wdr75/Rrp15/Mrto4/Nob1/Utp14a/Exosc2/Pak1ip1/Nhp2/Nop2/Nop14/Dkc1/Rpl14/Bysl/Rpp40/Rps8/Usp36/Mak16/Ncl/Pa2g4/Mphosph10/Nop9/Pes1/Ddx49/Rrp1/Gtpbp4/Wdr18/Tsr3/Lyar/Exosc8/Gar1/Pwp2/Nsun5/Nop53/Npm1/Rrp7a/Rcl1/Mrm3/Rps6/Nsun4/Exosc4/Eif6/Wdr3/Exosc1/Rps7/Rpl5/Ddx27/Rps19/Lsm6/Wdr43/Pop5/Rps15/Ddx51/Nol8/Znh…		GO:0016072	rRNA metabolic process	4.25181	5.08974e-22	7.83142e-19	Ftsj3/Ppan/Spout1/Utp4/Polr1b/Slfn2/Wdr46/Tbl3/Wdr12/Wdr75/Mars1/Usp36/Suv39h1/Ddx21/Nop2/Wdr43/Dis3/Nop14/Pwp2/Heatr1/Rrp9/Bop1/Rrs1/Ddx54/Wdr3/Exosc2/Wdr36/Ddx27/Dkc1/Ddx51/Mphosph10/Bysl/Nat10/Ippk/Rrp7a/Mrto4/Chd7/Ddx56/Las1l/Nsun5/Nol9/Nop9/Myc/Ncl/Utp18/Nol6/Nol11/Pes1/Tsr1/Utp14a/Ddx10/Nob1/Smarca4/Utp6/Pa2g4/Kri1/Polr1e/Riok3/Rpp40
GO:0016072	rRNA metabolic process	3.72922	2.23252e-28	2.78061e-25	Slfn2/Wdr12/Spout1/Myc/Ppan/Tbl3/Utp4/Rrs1/Wdr55/Rrp9/Ftsj3/Wdr46/Ebna1bp2/Ddx56/Ddx21/Utp18/Bop1/Fbl/Wdr75/Rrp15/Mrto4/Nob1/Utp14a/Exosc2/Pak1ip1/Nhp2/Nop2/Nop14/Dkc1/Rpl14/Bysl/Rpp40/Rps8/Usp36/Mak16/Polr1e/Ncl/Pa2g4/Mphosph10/Nop9/Pes1/Polr1b/Ddx49/Rrp1/Gtpbp4/Wdr18/Tsr3/Lyar/Mars1/Exosc8/Gar1/Pwp2/Macroh2a1/Nsun5/Nop53/Npm1/Rrp7a/Rcl1/Mrm3/Rps6/Nsun4/Exosc4/Eif6/Wdr3/Exosc1/Rps7/Rpl5/Ddx27/Rp…		GO:0006364	rRNA processing	4.40137	2.99931e-20	3.4612e-17	Ftsj3/Ppan/Spout1/Utp4/Wdr46/Tbl3/Wdr12/Wdr75/Usp36/Suv39h1/Ddx21/Nop2/Wdr43/Dis3/Nop14/Pwp2/Heatr1/Rrp9/Bop1/Rrs1/Ddx54/Wdr3/Exosc2/Wdr36/Ddx27/Dkc1/Ddx51/Mphosph10/Bysl/Nat10/Rrp7a/Mrto4/Chd7/Ddx56/Las1l/Nsun5/Nol9/Nop9/Ncl/Utp18/Nol6/Nol11/Pes1/Tsr1/Utp14a/Ddx10/Nob1/Utp6/Pa2g4/Kri1/Riok3/Rpp40
GO:0002181	cytoplasmic translation	3.52943	6.85984e-20	6.83515e-17	Eif3a/Eif4ebp1/Eif3l/Sars1/Nemf/Eif4a1/Eif2b3/Eef2/Rpl4/Rpl14/Rps8/Rpl6/Eif4b/Rplp0/Pabpc1/Mif4gd/Rpl3/Rpsa/Rwdd1/Pkm/Eif3g/Uba52/Rps2/Eif2s2/Ybx1/Eif2b5/Eif3b/Etf1/Eif3j1/Rps6/Rpl8/Rpl12/Piwil2/Rps9/Rpl29/Rps7/Rps18/Denr/Rpl5/Rps5/Rps19/Rps4x/Eif3i/Rpl10a/Eif2b2/Rpl13/Rps15/Rpl9/Rpl17/Rpl23a/Rpl38/Rpl27/Rpl18/Rpl15/Rpl34/Rpl19/Rpl32/Rps24/Rpl31/Rps25/Rps3a1/Rpl36a/Rpl35a		GO:0042274	ribosomal small subunit biogenesis	5.41708	1.00332e-15	9.26264e-13	Nop56/Utp4/Wdr46/Tbl3/Aatf/Wdr75/Ltv1/Wdr43/Nop14/Pwp2/Nop58/Heatr1/Rrp9/Rrs1/Wdr3/Wdr36/Mphosph10/Bysl/Nat10/Rrp7a/Rcc1l/Nop9/Utp18/Nol6/Nom1/Nol11/Tsr1/Nob1/Utp6/Kri1/Riok3/Rpp40
GO:0042274	ribosomal small subunit biogenesis	4.4316	3.56127e-18	2.95704e-15	Ltv1/Tbl3/Nop56/Utp4/Rrs1/Rrp9/Wdr46/Nop58/Aatf/Utp18/Fbl/Wdr75/Nob1/Pno1/Nop14/Bysl/Rpp40/Rps8/Rcc1l/Rpsa/Mphosph10/Nop9/Tsr3/Pwp2/Npm1/Rrp7a/Rcl1/Rps6/Wdr3/Rps9/Rps7/Rps5/Rps19/Rps4x/Lsm6/Wdr43/Rps15/Utp20/Heatr1/Nom1/Rps24/Rps25/Rps3a1		GO:0006418	tRNA aminoacylation for protein translation	8.31554	9.14709e-14	7.03716e-11	Tars2/Tars1/Farsb/Yars1/Ears2/Mars1/Farsa/Iars1/Gars1/Vars1/Kars1/Aars2/Lars1/Wars1/Sars2/Cars1/Eprs1/Rars1/Nars1
GO:0042273	ribosomal large subunit biogenesis	5.21011	7.08068e-16	5.03942e-13	Wdr12/Ppan/Rrs1/Nop16/Ftsj3/Ebna1bp2/Bop1/Rrp15/Mrto4/Pak1ip1/Gtf3a/Nop2/Rpl14/Mak16/Rcc1l/Noc2l/Pes1/Gtpbp4/Nle1/Nop53/Npm1/Heatr3/Eif6/Nip7/Mtg1/Rpl5/Sdad1/Mdn1/Znhit6/Las1l/Rpl35a		GO:0043039	tRNA aminoacylation	7.74857	4.49371e-13	2.96328e-10	Tars2/Tars1/Farsb/Yars1/Ears2/Mars1/Farsa/Iars1/Gars1/Vars1/Kars1/Aars2/Lars1/Wars1/Sars2/Cars1/Eprs1/Rars1/Nars1
GO:0140241	translation at synapse	5.02523	1.02664e-11	5.68305e-09	Eef2/Rpl4/Rpl14/Rpl6/Uba52/Rpl8/Rpl12/Rpl29/Rpl5/Rps5/Rpl10a/Rpl13/Rpl9/Rpl17/Rpl23a/Rpl38/Rpl27/Rpl15/Rpl34/Rpl32/Rps24/Rpl36a/Rpl35a		GO:0006399	tRNA metabolic process	3.72244	5.99394e-13	3.4585e-10	Rtcb/Tars2/Slfn2/Tars1/Trmt61a/Farsb/Yars1/Ears2/Mars1/Farsa/Iars1/Wdr4/Pus7/Gars1/Vars1/Kars1/Exosc2/Aars2/Nsun2/Lars1/Trmt2a/Wars1/Sars2/Nat10/Cars1/Eprs1/Pus1/Polr3d/Trmt10c/Zcchc7/Rars1/Nars1/Akt1/Nemf/Qtrt2/Thumpd1/Trub1/Elac2/Rpp40
GO:0140242	translation at postsynapse	5.02523	1.02664e-11	5.68305e-09	Eef2/Rpl4/Rpl14/Rpl6/Uba52/Rpl8/Rpl12/Rpl29/Rpl5/Rps5/Rpl10a/Rpl13/Rpl9/Rpl17/Rpl23a/Rpl38/Rpl27/Rpl15/Rpl34/Rpl32/Rps24/Rpl36a/Rpl35a		GO:0043038	amino acid activation	7.57638	7.37664e-13	3.7834e-10	Tars2/Tars1/Farsb/Yars1/Ears2/Mars1/Farsa/Iars1/Gars1/Vars1/Kars1/Aars2/Lars1/Wars1/Sars2/Cars1/Eprs1/Rars1/Nars1
GO:0006399	tRNA metabolic process	2.78921	3.04796e-11	1.5185e-08	Rtcb/Slfn2/Farsb/Farsa/Tars2/Pus1/Rars2/Sars1/Dus1l/Nemf/Kars1/Exosc2/Sars2/Mettl1/Polr3d/Rpp40/Rars1/Trmt61a/Nsun2/Wdr4/Trmt1/Ears2/Vars1/Gars1/Nars2/Qars1/Yars1/Pusl1/Ctu1/Mars1/Exosc8/Tars1/Qtrt1/Mtfmt/Trub1/Kti12/Nsun4/Ddx1/Qrsl1/Polr2l/Lsm6/Pop5/Elp6/Trp53rkb/Eprs1/Pop1/Polr2f/Pus7		GO:0030490	maturation of SSU-rRNA	6.81874	7.06024e-12	3.25901e-09	Utp4/Wdr46/Tbl3/Wdr43/Nop14/Pwp2/Heatr1/Rrs1/Wdr3/Bysl/Nat10/Nop9/Nol11/Tsr1/Nob1/Utp6/Kri1/Riok3/Rpp40
GO:0140236	translation at presynapse	4.90484	5.26411e-11	2.38416e-08	Rpl4/Rpl14/Rpl6/Uba52/Rpl8/Rpl12/Rpl29/Rpl5/Rps5/Rpl10a/Rpl13/Rpl9/Rpl17/Rpl23a/Rpl38/Rpl27/Rpl15/Rpl34/Rpl32/Rps24/Rpl36a/Rpl35a		GO:0006520	amino acid metabolic process	2.9248	3.32486e-09	1.39523e-06	Psat1/Tha1/Tars2/Tars1/Farsb/Yars1/Ears2/Mars1/Farsa/Slc39a8/Iars1/Gars1/Vars1/Kars1/Got2/Glud1/Mthfd1/Shmt2/Aars2/Gcdh/Aldh18a1/Lars1/Mtr/Wars1/Sars2/Cars1/Eprs1/Ahcy/Rars1/Ucp2/Nars1/Shmt1/Txnrd1/Sephs1/Odc1/Cad/Ppat
GO:0045071	negative regulation of viral genome replication	4.8553	4.98475e-10	1.86532e-07	Apobec3/Ifi207/Oasl2/Oas1a/Ifitm3/Ccl5/Fam111a/Zc3hav1/Tnf/Oas2/Oasl1/Ifitm2/Bst2/Mx2/Isg15/Oas1g/Ifitm1/Ifih1/Eif2ak2/Banf1		GO:0000462	maturation of SSU-rRNA from tricistronic rRNA transcript (SSU-rRNA, 5.8S rRNA, LSU-rRNA)	7.06887	9.13642e-09	3.51448e-06	Utp4/Wdr46/Tbl3/Wdr43/Pwp2/Heatr1/Rrs1/Bysl/Nop9/Tsr1/Utp6/Kri1/Rpp40
GO:1903900	regulation of viral life cycle	3.32935	5.02621e-10	1.86532e-07	Apobec3/Ifi207/Trim30b/Gbp7/Oasl2/Nectin2/Trim30a/Oas1a/Ifitm3/Pde12/P4hb/Ccl5/Fam111a/Zc3hav1/Trim25/Tnf/Oas2/Kpna2/Larp1/Oasl1/Adarb1/Ifitm2/Bst2/Mx2/Isg15/Oas1g/Ifitm1/Ifih1/Eif2ak2/Lgals1/Banf1/Ppie		GO:0046112	nucleobase biosynthetic process	10.0935	3.96793e-08	1.40892e-05	Paics/Ctps1/Umps/Gart/Prps1/Shmt1/Cad/Dhodh/Ppat
GO:0050792	regulation of viral process	3.01644	5.24178e-10	1.86532e-07	Apobec3/Ifi207/Trim30b/Gbp7/Oasl2/Nectin2/Trim30a/Oas1a/Ifitm3/Pde12/P4hb/Ubp1/Ccl5/Sp100/Fam111a/Zc3hav1/Ifit1/Trim25/Tnf/Oas2/Kpna2/Larp1/Oasl1/Adarb1/Ifitm2/Bst2/Mx2/Isg15/Oas1g/Zfp36/Larp7/Ifitm1/Ifih1/Eif2ak2/Lgals1/Banf1/Ppie		GO:0000466	maturation of 5.8S rRNA from tricistronic rRNA transcript (SSU-rRNA, 5.8S rRNA, LSU-rRNA)	8.15639	9.53614e-08	3.1442e-05	Ftsj3/Wdr12/Bop1/Rrs1/Exosc2/Nol9/Nop9/Pes1/Kri1/Rpp40
GO:0048525	negative regulation of viral process	3.95812	6.86225e-10	2.27918e-07	Apobec3/Ifi207/Oasl2/Oas1a/Ifitm3/Ubp1/Ccl5/Sp100/Fam111a/Zc3hav1/Ifit1/Tnf/Oas2/Oasl1/Ifitm2/Bst2/Mx2/Isg15/Oas1g/Zfp36/Larp7/Ifitm1/Ifih1/Eif2ak2/Banf1		GO:0042273	ribosomal large subunit biogenesis	4.417	3.65377e-07	0.000112439	Ftsj3/Ppan/Noc2l/Wdr12/Heatr3/Nop2/Bop1/Rrs1/Sdad1/Nop16/Mrto4/Las1l/Rcc1l/Nol9/Pes1/Dhx30
GO:0045069	regulation of viral genome replication	3.90158	9.75648e-10	3.03792e-07	Apobec3/Ifi207/Gbp7/Oasl2/Oas1a/Ifitm3/Pde12/Ccl5/Fam111a/Zc3hav1/Tnf/Oas2/Larp1/Oasl1/Adarb1/Ifitm2/Bst2/Mx2/Isg15/Oas1g/Ifitm1/Ifih1/Eif2ak2/Banf1/Ppie		GO:0045943	positive regulation of transcription by RNA polymerase I	6.16827	6.55985e-07	0.000189252	Wdr75/Mars1/Ddx21/Wdr43/Heatr1/Mybbp1a/Ippk/Myo1c/Ncl/Nol11/Smarca4
GO:0042255	ribosome assembly	4.29174	1.21139e-09	3.55009e-07	Rrs1/Bop1/Mrto4/Eif5b/C1qbp/Nop2/Noa1/Rcc1l/Rpsa/Pwp2/Nop53/Rrp7a/Rps6/Eif2a/Eif6/Nip7/Mtg1/Rpl5/Rps19/Rps15/Mdn1/Rpl38		GO:0000479	endonucleolytic cleavage of tricistronic rRNA transcript (SSU-rRNA, 5.8S rRNA, LSU-rRNA)	8.97203	7.73051e-07	0.000209906	Tbl3/Bop1/Rrs1/Nol9/Nop9/Tsr1/Kri1/Rpp40
GO:0009451	RNA modification	2.8266	3.76754e-09	1.04277e-06	Apobec3/Spout1/Pus1/Pus7l/Apobec1/Ftsj3/Fbl/Sars1/Dus1l/Hnrnpab/Nhp2/Nop2/Mettl1/Dkc1/Trmt61a/Nsun2/Wdr4/Trmt1/Tsr3/Jmjd6/Pusl1/Ctu1/Dnajb11/Gar1/Qtrt1/Nsun5/Mtfmt/Trub1/Kti12/Mrm3/Nsun4/Adarb1/Rbm47/Elp6/Larp7/Rpusd3/Pus7		GO:0000460	maturation of 5.8S rRNA	5.98136	9.34767e-07	0.000239716	Ftsj3/Wdr12/Bop1/Rrs1/Exosc2/Las1l/Nol9/Nop9/Pes1/Kri1/Rpp40
GO:0000460	maturation of 5.8S rRNA	5.29669	5.72585e-09	1.50138e-06	Wdr12/Rrs1/Ftsj3/Bop1/Rrp15/Exosc2/Rpp40/Mak16/Nop9/Pes1/Exosc8/Npm1/Rcl1/Exosc4/Eif6/Las1l		GO:0010608	post-transcriptional regulation of gene expression	1.91855	5.43779e-06	0.00131909	Arid5a/Bcl3/Myd88/Serp1/Gcnt2/Stat3/Spout1/Slfn2/Ifrd2/Wdr4/App/Pus7/Zc3h12d/Dnajc3/Piwil2/Pnpt1/Eif3b/Nolc1/Shmt2/Eif2b5/Dkc1/Nsun2/Syncrip/Ncbp1/Pum3/Tsnax/Nat10/Abce1/Eprs1/Larp1/Trmt10c/Eif4g1/Eif4enif1/Abcf1/Nsun5/Ncl/Akt1/Focad/Pde12/Shmt1/Ywhag/Usp5/Bzw2/Cnot10/Eif2s1/Rbm47/Sesn2/Trub1/Kbtbd8/Pa2g4/Ppp1r15b
GO:0009615	response to virus	2.05416	1.01279e-08	2.52286e-06	Bcl3/Myd88/Apobec3/Ifi207/Ddx41/Gbp7/Zbp1/Rtp4/Oasl2/Apobec1/Irgm1/Trim30a/Becn1/Ddx56/Ddx21/Gbp2/Dhx58/Usp18/Cct5/Phb1/Oas1a/C1qbp/Eef1g/Gpr146/Ifi27l2a/Ifitm3/Irf7/Ddit4/Polr3d/Pde12/Atad3a/Fgl2/Eif5a/Stat2/Gtf2f1/Parp9/Odc1/Igtp/Phb2/Ccl5/Pim2/Zc3hav1/Ifit1/Trim25/Tnf/Ilrun/Oas2/Mx1/Oasl1/Exosc4/Lgals9/Ripk3/Ifitm2/Marchf2/Cfl1/Ndufaf4/Bst2/Ddx1/Ap1s1/Tagap/Mx2/Isg15/Oas1g/Ifitm1/Ifih1/Eif2ak2		GO:0009112	nucleobase metabolic process	5.60752	5.71531e-06	0.00131909	Xdh/Paics/Ctps1/Umps/Gart/Prps1/Shmt1/Cad/Dhodh/Ppat
GO:0043039	tRNA aminoacylation	4.46908	1.83686e-08	4.35772e-06	Farsb/Farsa/Tars2/Rars2/Sars1/Kars1/Sars2/Rars1/Ears2/Vars1/Gars1/Nars2/Qars1/Yars1/Mars1/Tars1/Qrsl1/Eprs1		GO:0051604	protein maturation	1.90656	6.49588e-06	0.00142786	Cdk20/Fam111a/Adam9/F13a1/Rnpep/Anpep/Comp/Pigs/Cct6a/Fkbp5/Hspa9/Hspd1/Dnajc3/Cct3/Prep/Zpr1/P4hb/Cct5/Gpaa1/Psen1/Pigo/Txndc5/Notch4/Ctsl/Naa50/Telo2/Zdhhc9/Pign/Ccdc47/Myc/Qsox2/Dpp9/Akt1/Dnaja3/Afg3l2/Cct8/Dnajc5/Rhbdd1/Slc30a5/Furin/Nktr/Tcp1/Mms19/Bag3/Dnaja1/Hspa5/Dnajb13/Ddi2/Mipep/Pcsk7/Pofut2
GO:0045088	regulation of innate immune response	1.87208	2.73249e-08	5.8145e-06	Ifi204/Myd88/Ifi207/Ddx41/Gbp7/Gusb/Zbp1/Ifi35/Slc19a1/Ddx39a/Nectin2/Irgm1/Trim30a/Becn1/Ddx56/Gbp2/Tnip2/Dhx58/Cd300lf/Ecsit/Usp18/Scimp/Arf6/Phb1/Oas1a/C1qbp/Ifi209/Irf7/Polr3d/Vsig4/Hspd1/Nfkbia/Rftn1/Stat2/Gbp3/Arrb2/Parp9/Il18rap/Igtp/Xpnpep1/Lyar/Zdhhc12/Phb2/Ccdc134/Ifi211/Nop53/Zc3hav1/Cd14/Tlr1/App/Trim25/Tnf/Nlrx1/Apoe/Casp4/Dpp9/Oasl1/Lgals9/Rbm47/Isg15/Cdc37/Rps19/Tap1/Oas1g/Parp14/E…		GO:0006356	regulation of transcription by RNA polymerase I	4.81426	1.01299e-05	0.00212013	Wdr75/Mars1/Ddx21/Wdr43/Heatr1/Mybbp1a/Ippk/Myo1c/Ncl/Nol11/Smarca4
GO:0071826	protein-RNA complex organization	2.43394	2.78156e-08	5.8145e-06	Rrs1/Prmt5/Eif3a/Bop1/Eif3l/Mrto4/Nop2/Ruvbl2/Lsm4/Prpf31/Dkc1/Eif4b/Rcc1l/Rpsa/Prmt7/Kif5b/Nopchap1/Eif3g/Eif2s2/Eif3b/Pwp2/Lsm2/Nop53/Rrp7a/Eif3j1/Rps6/Wdr77/Eif6/Mtg1/Denr/Rpl5/Gemin2/Luc7l/Rps19/Eif3i/Rps15/Htatsf1/Mdn1/Dnajc17/Rpl38/Znhit6/Shq1/Gemin6		GO:0006360	transcription by RNA polymerase I	3.86488	1.05639e-05	0.00212013	Wdr75/Mars1/Ddx21/Rrn3/Wdr43/Heatr1/Mybbp1a/Taf1a/Ippk/Myo1c/Ncl/Nol11/Smarca4/Polr1e
GO:0043038	amino acid activation	4.36977	2.80104e-08	5.8145e-06	Farsb/Farsa/Tars2/Rars2/Sars1/Kars1/Sars2/Rars1/Ears2/Vars1/Gars1/Nars2/Qars1/Yars1/Mars1/Tars1/Qrsl1/Eprs1		GO:0001819	positive regulation of cytokine production	1.87416	2.33653e-05	0.00449393	Cd244a/Arid5a/Bcl3/C5ar1/Il4ra/Myd88/Stat3/Ifi207/Fcgr2b/Ddx21/Irak1/Nfam1/Arrdc4/Gpr65/Hspd1/App/Sorl1/P2ry2/Trpv4/Tmem106a/Mavs/Cebpb/Batf/Slc7a5/Chuk/Kat2a/Psen1/Ddx41/Runx1/Nrdc/Ccn1/Cul3/Polr3d/G3bp1/Rftn1/Ncl/Tlr1/Rbm47/Kpna2/Tarm1/Card9/Panx1/Siglec1/Il17ra/Cd34/Riok3/Ptprc
GO:0006418	tRNA aminoacylation for protein translation	4.52964	3.59715e-08	7.16841e-06	Farsb/Farsa/Tars2/Rars2/Sars1/Kars1/Sars2/Rars1/Ears2/Vars1/Gars1/Nars2/Qars1/Yars1/Mars1/Tars1/Eprs1		GO:0009124	nucleoside monophosphate biosynthetic process	4.19967	4.11037e-05	0.0075384	Paics/Umps/Shmt2/Gart/Atic/Prps1/Shmt1/Gmps/Cad/Dhodh/Ppat
GO:0019079	viral genome replication	3.13786	4.56419e-08	8.74569e-06	Apobec3/Ifi207/Gbp7/Oasl2/Ddx56/Phb1/Oas1a/Ifitm3/Pde12/Ccl5/Fam111a/Zc3hav1/Tnf/Oas2/Larp1/Oasl1/Adarb1/Ifitm2/Bst2/Mx2/Isg15/Oas1g/Ifitm1/Ifih1/Eif2ak2/Banf1/Ppie		GO:0009451	RNA modification	2.63514	4.24606e-05	0.0075384	Pus7l/Ftsj3/Spout1/Trmt61a/Apobec3/Nop2/Wdr4/Pus7/Dkc1/Adarb1/Nsun2/Syncrip/Nat10/Pus1/Trmt10c/Nsun5/Akt1/Qtrt2/Thumpd1/Rbm47/Trub1
GO:0000470	maturation of LSU-rRNA	5.27386	5.60115e-08	9.84588e-06	Wdr12/Ppan/Ftsj3/Bop1/Rrp15/Pak1ip1/Nop2/Mak16/Pes1/Gtpbp4/Npm1/Eif6/Znhit6/Las1l		GO:0006457	protein folding	2.47134	5.25546e-05	0.0089849	Cct6a/Fkbp5/Hspa9/Hspd1/Dnajc3/Cct3/Zpr1/P4hb/Cct5/Txndc5/Telo2/Ccdc47/Qsox2/Dnaja3/Cct8/Dnajc5/Nktr/Tcp1/Bag3/Dnaja1/Hspa5/Dnajb13/Pofut2
GO:0035456	response to interferon-beta	3.58712	5.72748e-08	9.84588e-06	Ifi204/Ifi207/Ddx41/Gbp7/Irgm1/Gbp2/Xaf1/Oas1a/Gpr146/Ifi209/Ifitm3/Gbp3/Igtp/Pnpt1/Ifi211/Ifit1/Ifitm2/Bst2/Oas1g/Calm1/Ifitm1/Ifi205		GO:0016556	mRNA modification	6.28042	6.63538e-05	0.0109389	Pus7l/Pus7/Dkc1/Adarb1/Syncrip/Pus1/Trub1
GO:0022618	protein-RNA complex assembly	2.43425	5.8105e-08	9.84588e-06	Rrs1/Prmt5/Eif3a/Bop1/Eif3l/Mrto4/Nop2/Ruvbl2/Lsm4/Prpf31/Dkc1/Eif4b/Rcc1l/Rpsa/Prmt7/Nopchap1/Eif3g/Eif2s2/Eif3b/Pwp2/Lsm2/Nop53/Rrp7a/Eif3j1/Rps6/Wdr77/Eif6/Mtg1/Denr/Rpl5/Gemin2/Luc7l/Rps19/Eif3i/Rps15/Htatsf1/Mdn1/Rpl38/Znhit6/Shq1/Gemin6		GO:0009895	negative regulation of catabolic process	1.91887	0.000105562	0.0162568	Arid5a/Hcar2/Myd88/Stat3/Mcl1/Slfn2/Usp36/Wdr4/Tbc1d14/Sorl1/Hdac4/Tigar/Dkc1/Usp7/Nsun2/Syncrip/Slc7a5/Chuk/Psen1/Ubxn2a/Larp1/Git1/Eif4g1/Eif4enif1/Ubqln4/Ddit4/Hfe/Sf3b3/Ric1/Akt1/Usp5/Rbm47/Hdac6/Furin/Smad4/Vps13c/Hmox1
GO:0045089	positive regulation of innate immune response	1.93278	5.92887e-08	9.84588e-06	Ifi204/Myd88/Ifi207/Ddx41/Gbp7/Gusb/Zbp1/Ifi35/Slc19a1/Ddx39a/Nectin2/Irgm1/Trim30a/Becn1/Ddx56/Gbp2/Tnip2/Dhx58/Cd300lf/Ecsit/Scimp/Arf6/Phb1/Oas1a/C1qbp/Ifi209/Irf7/Polr3d/Hspd1/Nfkbia/Rftn1/Gbp3/Arrb2/Parp9/Il18rap/Igtp/Xpnpep1/Zdhhc12/Phb2/Ccdc134/Ifi211/Nop53/Zc3hav1/Cd14/Tlr1/App/Trim25/Tnf/Nlrx1/Casp4/Dpp9/Oasl1/Lgals9/Rbm47/Rps19/Oas1g/Elp6/Xrcc6/Sh2d1b1/Cactin/Ranbp2/Smpdl3b/Rab7b/Nr1h3/…		GO:1901838	positive regulation of transcription of nucleolar large rRNA by RNA polymerase I	8.97203	0.000105655	0.0162568	Mars1/Ippk/Ncl/Nol11/Smarca4
GO:0002218	activation of innate immune response	2.01936	7.02955e-08	1.12972e-05	Ifi204/Myd88/Ifi207/Ddx41/Gbp7/Gusb/Zbp1/Ifi35/Slc19a1/Ddx39a/Irgm1/Trim30a/Becn1/Ddx56/Gbp2/Tnip2/Dhx58/Cd300lf/Ecsit/Scimp/Arf6/Phb1/Oas1a/C1qbp/Ifi209/Irf7/Hspd1/Nfkbia/Rftn1/Gbp3/Arrb2/Igtp/Xpnpep1/Zdhhc12/Phb2/Ccdc134/Ifi211/Nop53/Zc3hav1/Cd14/Tlr1/App/Trim25/Tnf/Nlrx1/Casp4/Dpp9/Oasl1/Oas1g/Elp6/Xrcc6/Cactin/Ranbp2/Smpdl3b/Rab7b/Nr1h3/Ifih1/Ifi205/Eif2ak2/Banf1/Hspa8		GO:0009156	ribonucleoside monophosphate biosynthetic process	4.48602	0.000119127	0.0177384	Paics/Umps/Gart/Atic/Prps1/Gmps/Cad/Dhodh/Ppat
GO:0051607	defense response to virus	2.12201	7.37751e-08	1.14859e-05	Myd88/Apobec3/Ifi207/Ddx41/Gbp7/Zbp1/Rtp4/Oasl2/Apobec1/Irgm1/Trim30a/Becn1/Ddx56/Ddx21/Gbp2/Dhx58/Usp18/Phb1/Oas1a/C1qbp/Gpr146/Ifitm3/Irf7/Ddit4/Polr3d/Pde12/Atad3a/Fgl2/Stat2/Parp9/Igtp/Phb2/Ccl5/Zc3hav1/Ifit1/Trim25/Tnf/Ilrun/Oas2/Oasl1/Exosc4/Ripk3/Ifitm2/Marchf2/Ndufaf4/Bst2/Ddx1/Tagap/Mx2/Isg15/Oas1g/Ifitm1/Ifih1/Eif2ak2		GO:0000470	maturation of LSU-rRNA	4.95009	0.000134899	0.0194592	Ftsj3/Ppan/Wdr12/Nop2/Bop1/Las1l/Nol9/Pes1
GO:0032543	mitochondrial translation	2.75261	8.31267e-08	1.25496e-05	Dap3/Rars2/Mrps18b/C1qbp/Sars2/Shmt2/Mrpl12/Ears2/Gars1/Mrpl2/Mrpl38/Mrpl19/Mrps17/Mrpl16/Mrpl52/Mrpl24/Mtg1/Qrsl1/Mrpl33/Mrps12/Mrps7/Mrpl28/Mrps10/Mrps34/Mrps28/Mrpl58/Gadd45gip1/Mrps26/Mrps15/Mrps25/Rpusd3/Mrps24		GO:0032212	positive regulation of telomere maintenance via telomerase	5.46124	0.000181174	0.0253424	Cct6a/Cct3/Dkc1/Cct5/Cct8/Atm/Tcp1
GO:0030490	maturation of SSU-rRNA	3.93279	1.8903e-07	2.76985e-05	Tbl3/Utp4/Rrs1/Wdr46/Nob1/Nop14/Bysl/Rpp40/Rps8/Nop9/Tsr3/Pwp2/Rcl1/Wdr3/Rps19/Lsm6/Wdr43/Heatr1		GO:0002823	negative regulation of adaptive immune response based on somatic recombination of immune receptors built from immunoglobulin superfamily domains	3.58881	0.000187893	0.0255093	Il4ra/Fcgr2b/Jak3/Parp3/Bcl6/Zdhhc9/Hfe/Ywhag/Syvn1/Usp5/Ptprc
GO:0016032	viral process	2.11714	2.41172e-07	3.43291e-05	Apobec3/Ifi207/Trim30b/Gbp7/Oasl2/Tpcn2/Nectin2/Trim30a/Ddx56/Eif3a/Eif3l/Siglec1/Cd300lf/Phb1/Oas1a/Ifitm3/Pde12/P4hb/Eif3g/Ubp1/Ccl5/Sp100/Fam111a/Eif3b/Zc3hav1/Ifit1/Trim25/Tnf/Oas2/Kpna2/Apoe/Larp1/Oasl1/Adarb1/Ifitm2/Bst2/Slc7a1/Chmp2a/Mx2/Isg15/Denr/Oas1g/Zfp36/Larp7/Ifitm1/Ifih1/Eif2ak2/Lgals1/Banf1/Ppie		GO:0006417	regulation of translation	1.89169	0.000212529	0.0280296	Bcl3/Serp1/Ifrd2/App/Pus7/Dnajc3/Piwil2/Eif3b/Nolc1/Shmt2/Eif2b5/Syncrip/Ncbp1/Pum3/Nat10/Abce1/Eprs1/Larp1/Trmt10c/Eif4g1/Eif4enif1/Abcf1/Nsun5/Ncl/Akt1/Shmt1/Ywhag/Usp5/Bzw2/Cnot10/Eif2s1/Sesn2/Kbtbd8/Pa2g4/Ppp1r15b
GO:0010608	post-transcriptional regulation of gene expression	1.78638	2.52031e-07	3.48782e-05	Bcl3/Myd88/Slfn2/Arid5a/Spout1/Serp1/Gcnt2/Apobec1/Pum3/Eif4ebp1/Tsnax/Sars1/Eif5b/Stat3/Per1/C1qbp/Ifrd2/Mettl1/Rack1/Eef2/Dkc1/Zc3h12d/Shmt2/Pde12/Nolc1/Ncl/Nsun2/Pabpc1/Wdr4/Mif4gd/Pa2g4/Eif5a/Ddx49/Abcf1/Pkm/Tpr/Parp9/Xbp1/Upf3a/Pnpt1/Ybx1/Eif2s1/Serbp1/Apex1/Eif2b5/Eif3b/Nsun5/Trub1/Npm1/Wfs1/Etf1/App/Bzw2/Tnf/Eif2a/Larp1/Rbm3/Piwil2/Tbrg4/Eif6/Trnau1ap/Rbm47/Mtg1/Rpl5/Cdc37/Rps4x/Eif4g1/Tra…		GO:0002274	myeloid leukocyte activation	2.08832	0.000229863	0.0294735	Cd244a/Fcgr4/C5ar1/Il4ra/Rbpj/Myd88/Sbno2/Adam9/Lcp2/Pla2g4a/Ctsc/Hspd1/Il18rap/App/Pirb/Kars1/Tmem106a/Cd300lf/Batf/Psen1/Tnip2/Itgb2/Tlr1/Pilrb1/Vsig4/Atm/Hmox1
GO:0002833	positive regulation of response to biotic stimulus	1.84712	2.91767e-07	3.9286e-05	Ifi204/Myd88/Ifi207/Ddx41/Gbp7/Gusb/Zbp1/Ifi35/Slc19a1/Ddx39a/Nectin2/Irgm1/Trim30a/Becn1/Ddx56/Gbp2/Tnip2/Dhx58/Cd300lf/Ecsit/Scimp/Arf6/Phb1/Oas1a/C1qbp/Ifi209/Irf7/Polr3d/Hspd1/Nfkbia/Rftn1/Gbp3/Arrb2/Parp9/Il18rap/Igtp/Xpnpep1/Zdhhc12/Phb2/Ccdc134/Ifi211/Nop53/Zc3hav1/Cd14/Tlr1/App/Trim25/Tnf/Nlrx1/Casp4/Dpp9/Oasl1/Lgals9/Rbm47/Rps19/Oas1g/Cxcl1/Elp6/Xrcc6/Sh2d1b1/Cactin/Ranbp2/Smpdl3b/Rab7b/…		GO:0098760	response to interleukin-7	5.23369	0.000243572	0.0303873	Jak3/Hspd1/Atic/P4hb/Jak1/Fosl2/Stip1
GO:0001522	pseudouridine synthesis	6.42613	4.25232e-07	5.57502e-05	Pus1/Pus7l/Nhp2/Dkc1/Tsr3/Pusl1/Gar1/Trub1/Rpusd3/Pus7		GO:0009070	serine family amino acid biosynthetic process	7.47669	0.000302339	0.0354291	Psat1/Tha1/Shmt2/Shmt1/Sephs1
GO:0045824	negative regulation of innate immune response	2.96859	4.60864e-07	5.74289e-05	Ifi207/Ddx39a/Nectin2/Irgm1/Dhx58/Usp18/Oas1a/Vsig4/Stat2/Arrb2/Igtp/Lyar/Nlrx1/Lgals9/Isg15/Rps19/Tap1/Oas1g/Parp14/Sh2d1b1/Cactin/Ranbp2/Smpdl3b/Banf1/Pim1		GO:0035771	interleukin-4-mediated signaling pathway	7.47669	0.000302339	0.0354291	Il4ra/Jak3/Cd300lf/Jak1/Ptprc
GO:0002764	immune response-regulating signaling pathway	1.76055	4.61091e-07	5.74289e-05	Fcgr4/C5ar1/Myd88/Fcgr2b/Ifi207/Ddx41/Gusb/Fcgr3/Ifi35/Slc19a1/Ddx39a/Nectin2/Irgm1/Trim30a/Becn1/Ddx56/Lcp2/Gbp2/Tnip2/Dhx58/Cd300lf/Ecsit/Scimp/Arf6/Phb1/Oas1a/Ctsh/Psen2/C3ar1/Eif2b3/C1qbp/Irf7/Wnk1/Hspd1/Nfkbia/Rftn1/Fcgr1/Pirb/Arrb2/Igtp/Xpnpep1/Zdhhc12/Phb2/Tarm1/Ccdc134/Cd38/Eif2b5/Cd72/Nop53/Zc3hav1/Cd14/Tlr1/App/Trim25/Tnf/Nlrx1/Casp4/Rab29/Dpp9/Oasl1/Rnf31/Tmigd3/Oas1g/Eif2b2/Elp6/Sh2d1…		GO:0002820	negative regulation of adaptive immune response	3.40318	0.000307011	0.0354291	Il4ra/Fcgr2b/Jak3/Parp3/Bcl6/Zdhhc9/Hfe/Ywhag/Syvn1/Usp5/Ptprc
GO:0035455	response to interferon-alpha	4.89715	4.98791e-07	6.06091e-05	Ifi204/Myc/Oas1a/Ifitm3/Pde12/Tpr/Ifi211/Ifit1/Ifitm2/Bst2/Oas1g/Ifitm1/Eif2ak2		GO:0006413	translational initiation	2.40097	0.000334952	0.0373232	Eif1a/Atad3a/Dnajc3/Eif3b/Eif2b5/Ncbp1/Abce1/Larp1/Eif4g1/Abcf1/Eif4a1/Eif3l/Akt1/Ywhag/Eif3c/Bzw2/Eif2s1/Ppp1r15b/Hspa5
GO:0034340	response to type I interferon	3.16233	6.86454e-07	8.14265e-05	Myd88/Zbp1/Oasl2/Usp18/Oas1a/Ifitm3/Irf7/Shmt2/Stat2/Sp100/Hdac4/Oas2/Oasl1/Ifitm2/Rbm47/Mx2/Isg15/Cdc37/Oas1g/Cactin/Ifitm1/Ifih1		GO:0019724	B cell mediated immunity	2.63399	0.000339595	0.0373232	Fcgr4/Bcl3/Il4ra/Myd88/C4b/Csf2rb2/Csf2rb/Fcgr2b/Parp3/Hspd1/Pirb/Sanbr/Bcl6/Batf/Card9/Ptprc
GO:0000466	maturation of 5.8S rRNA from tricistronic rRNA transcript (SSU-rRNA, 5.8S rRNA, LSU-rRNA)	5.46221	9.86786e-07	0.000114329	Wdr12/Rrs1/Ftsj3/Bop1/Exosc2/Rpp40/Nop9/Pes1/Exosc8/Npm1/Rcl1		GO:0002460	adaptive immune response based on somatic recombination of immune receptors built from immunoglobulin superfamily domains	1.91816	0.000377494	0.0405235	Arid5a/Fcgr4/Bcl3/Il4ra/Rab27a/Myd88/Stat3/C4b/Slfn2/Gadd45g/Csf2rb2/Csf2rb/Fcgr2b/Jak3/Pla2g4a/Ctsc/Parp3/Hspd1/Pirb/Sanbr/Bcl6/Batf/Rftn1/Zdhhc9/Hfe/Ywhag/Syvn1/Usp5/Card9/Il17ra/Ptprc
GO:0031348	negative regulation of defense response	2.10987	1.05741e-06	0.000119728	Socs3/Fcgr2b/Ifi207/Alox5/Siglece/Ddx39a/Nectin2/Irgm1/Dhx58/Usp18/Gba1/Oas1a/Stat3/C1qbp/Vsig4/Fgl2/Slc39a8/Stat2/Arrb2/Igtp/Lyar/Ier3/Ilrun/Nlrx1/Apoe/Lgals9/Il22ra2/Metrnl/Gpx1/Isg15/Rps19/Tap1/Adora1/Oas1g/Parp14/Ctla2a/Zfp36/Gpr31b/Sh2d1b1/Cactin/Ranbp2/Smpdl3b/Nr1h3/Banf1/Pim1		GO:1904358	positive regulation of telomere maintenance via telomere lengthening	4.83109	0.000419868	0.0427166	Cct6a/Cct3/Dkc1/Cct5/Cct8/Atm/Tcp1
GO:0002221	pattern recognition receptor signaling pathway	1.96937	1.13441e-06	0.000125591	Myd88/Ifi207/Ddx41/Gusb/Ifi35/Slc19a1/Ddx39a/Irgm1/Trim30a/Becn1/Ddx56/Gbp2/Tnip2/Dhx58/Cd300lf/Ecsit/Scimp/Arf6/Phb1/Oas1a/C1qbp/Irf7/Hspd1/Nfkbia/Rftn1/Arrb2/Igtp/Xpnpep1/Zdhhc12/Phb2/Ccdc134/Nop53/Zc3hav1/Cd14/Tlr1/App/Trim25/Tnf/Nlrx1/Casp4/Dpp9/Oasl1/Oas1g/Elp6/Cactin/Ranbp2/Smpdl3b/Rab7b/Nr1h3/Ifih1/Eif2ak2/Banf1/Hspa8		GO:0000027	ribosomal large subunit assembly	5.66655	0.000425685	0.0427166	Nop2/Bop1/Rrs1/Mrto4/Rcc1l/Dhx30
GO:0006413	translational initiation	2.46184	1.25114e-06	0.000133048	Eif1a/Eif3a/Eif4ebp1/Eif3l/Eif5b/Eif4a1/Eif2b3/Atad3a/Eif4b/Mif4gd/Abcf1/Eif3g/Tpr/Eif2s2/Eif2s1/Eif2b5/Eif3b/Mtfmt/Npm1/Eif3j1/Bzw2/Tnf/Eif2a/Larp1/Eif6/Denr/Eif4g1/Eif3i/Eif2b2/Hspa5/Eif2ak2/Habp4		GO:0000463	maturation of LSU-rRNA from tricistronic rRNA transcript (SSU-rRNA, 5.8S rRNA, LSU-rRNA)	5.66655	0.000425685	0.0427166	Ftsj3/Ppan/Wdr12/Bop1/Nol9/Pes1
GO:0006520	amino acid metabolic process	2.11751	1.25517e-06	0.000133048	Psat1/Tha1/Farsb/Farsa/Ucp2/Tars2/Ahcy/Mri1/Rars2/Got2/Sars1/Kars1/Sars2/Gcdh/Shmt2/Rars1/Ears2/Vars1/Gars1/Slc39a8/Nars2/Qars1/Odc1/Mthfd1/Yars1/Mars1/Tars1/Kyat3/Bckdhb/Cdo1/Adss1/Mtr/Txnrd1/Pycr1/Aldh18a1/Qrsl1/Pemt/Hibch/Eprs1/Kyat1/Gcsh/Asrgl1/Htatip2/Etfb		GO:0106074	aminoacyl-tRNA metabolism involved in translational fidelity	6.90156	0.000468847	0.0460467	Tars2/Iars1/Vars1/Aars2/Lars1
GO:0140888	interferon-mediated signaling pathway	2.95602	1.42826e-06	0.000148241	Myd88/Zbp1/Oasl2/Irgm1/Usp18/Oas1a/Ifitm3/Irf7/Stat2/Parp9/Igtp/Hdac4/Oas2/Oasl1/Ifitm2/Rbm47/Isg15/Cdc37/Oas1g/Parp14/Cactin/Ifitm1/Ifih1		GO:0051168	nuclear export	2.25712	0.000536042	0.0495523	Gle1/Ltv1/Hspa9/Sdad1/Xpo1/Nsun2/Ncbp1/Nup93/Cpsf6/Cse1l/Eif4enif1/Lsg1/Ddx39a/Nop9/Rangap1/Nol6/Nemf/Nup153/Nup133/Bag3
GO:0000027	ribosomal large subunit assembly	5.74969	1.70164e-06	0.00017293	Rrs1/Bop1/Mrto4/Nop2/Rcc1l/Nop53/Eif6/Mtg1/Rpl5/Mdn1		GO:0003416	endochondral bone growth	4.65217	0.000539852	0.0495523	Ecm1/Comp/Gusb/Ext1/Carm1/Por/Fosl2
GO:0002758	innate immune response-activating signaling pathway	1.94293	1.73555e-06	0.00017293	Myd88/Ifi207/Ddx41/Gusb/Ifi35/Slc19a1/Ddx39a/Irgm1/Trim30a/Becn1/Ddx56/Gbp2/Tnip2/Dhx58/Cd300lf/Ecsit/Scimp/Arf6/Phb1/Oas1a/C1qbp/Irf7/Hspd1/Nfkbia/Rftn1/Arrb2/Igtp/Xpnpep1/Zdhhc12/Phb2/Ccdc134/Nop53/Zc3hav1/Cd14/Tlr1/App/Trim25/Tnf/Nlrx1/Casp4/Dpp9/Oasl1/Oas1g/Elp6/Cactin/Ranbp2/Smpdl3b/Rab7b/Nr1h3/Ifih1/Eif2ak2/Banf1/Hspa8		GO:0009069	serine family amino acid metabolic process	4.65217	0.000539852	0.0495523	Psat1/Tha1/Mthfd1/Shmt2/Shmt1/Txnrd1/Sephs1
GO:0000462	maturation of SSU-rRNA from tricistronic rRNA transcript (SSU-rRNA, 5.8S rRNA, LSU-rRNA)	4.30356	2.97219e-06	0.000290342	Tbl3/Utp4/Rrs1/Wdr46/Bysl/Rpp40/Rps8/Nop9/Pwp2/Rcl1/Rps19/Wdr43/Heatr1		GO:0006144	purine nucleobase metabolic process	5.38322	0.000579685	0.0495523	Xdh/Paics/Gart/Prps1/Shmt1/Ppat
GO:0016556	mRNA modification	5.46221	3.12403e-06	0.000299306	Pus1/Pus7l/Apobec1/Hnrnpab/Dkc1/Dnajb11/Trub1/Adarb1/Rpusd3/Pus7		GO:0007000	nucleolus organization	5.38322	0.000579685	0.0495523	Polr1b/Usp36/Suv39h1/Rrn3/Nolc1/Pes1
GO:0002832	negative regulation of response to biotic stimulus	2.50724	3.90808e-06	0.00036736	Ifi207/Ddx39a/Nectin2/Irgm1/Dhx58/Usp18/Oas1a/C1qbp/Vsig4/Fgl2/Stat2/Arrb2/Igtp/Lyar/Ilrun/Nlrx1/Lgals9/Isg15/Rps19/Tap1/Oas1g/Parp14/Sh2d1b1/Cactin/Ranbp2/Smpdl3b/Banf1/Pim1		GO:0016078	tRNA decay	5.38322	0.000579685	0.0495523	Slfn2/Wdr4/Exosc2/Nsun2/Zcchc7/Akt1
GO:0050727	regulation of inflammatory response	1.84824	4.41893e-06	0.000407687	Myd88/Socs3/Cebpb/Map3k8/Fcgr2b/Ifi207/Alox5/Zbp1/Fcgr3/Ifi35/Siglece/Setd6/Sbno2/Irgm1/Ctsc/Gbp2/Usp18/Gba1/Kars1/Stat3/Ctss/Nupr1/Nfkbia/Alox5ap/Fcgr1/Slc39a8/Trpv4/Gbp3/Serpine1/Tradd/Igtp/Ccl5/App/Ier3/Tnf/Nlrx1/Apoe/Casp4/Lgals9/Il22ra2/Metrnl/Gpx1/Adora3/Ccl7/Rps19/Ddt/Adora1/Psma6/Ctla2a/Il1r1/Zfp36/Gpr31b/Smpdl3b/Nr1h3/Lgals1/Bcl6		GO:0046653	tetrahydrofolate metabolic process	5.38322	0.000579685	0.0495523	Mthfd1/Shmt2/Mthfd2/Atic/Mtr/Shmt1
GO:0019058	viral life cycle	2.0908	5.22851e-06	0.000473608	Apobec3/Ifi207/Trim30b/Gbp7/Oasl2/Tpcn2/Nectin2/Trim30a/Ddx56/Siglec1/Cd300lf/Phb1/Oas1a/Ifitm3/Pde12/P4hb/Ccl5/Fam111a/Zc3hav1/Trim25/Tnf/Oas2/Kpna2/Apoe/Larp1/Oasl1/Adarb1/Ifitm2/Bst2/Slc7a1/Chmp2a/Mx2/Isg15/Oas1g/Ifitm1/Ifih1/Eif2ak2/Lgals1/Banf1/Ppie
GO:0140053	mitochondrial gene expression	2.23753	5.7416e-06	0.000510797	Dap3/Rars2/Mrps18b/C1qbp/Sars2/Shmt2/Mrpl12/Ears2/Gars1/Pnpt1/Mrpl2/Mrpl38/Tbrg4/Mrpl19/Mrps17/Mrpl16/Mrpl52/Mrpl24/Mtg1/Qrsl1/Mrpl33/Mrps12/Mrps7/Mrpl28/Mrps10/Mrps34/Mrps28/Mrpl58/Gadd45gip1/Mrps26/Mrps15/Mrps25/Rpusd3/Mrps24
GO:0060337	type I interferon-mediated signaling pathway	3.05241	6.94835e-06	0.000596839	Myd88/Zbp1/Oasl2/Usp18/Oas1a/Ifitm3/Irf7/Stat2/Hdac4/Oas2/Oasl1/Ifitm2/Rbm47/Isg15/Cdc37/Oas1g/Cactin/Ifitm1/Ifih1
GO:0071357	cellular response to type I interferon	3.05241	6.94835e-06	0.000596839	Myd88/Zbp1/Oasl2/Usp18/Oas1a/Ifitm3/Irf7/Stat2/Hdac4/Oas2/Oasl1/Ifitm2/Rbm47/Isg15/Cdc37/Oas1g/Cactin/Ifitm1/Ifih1
GO:0002753	cytoplasmic pattern recognition receptor signaling pathway	2.0783	7.92309e-06	0.000669031	Myd88/Ifi207/Ddx41/Slc19a1/Ddx39a/Irgm1/Trim30a/Becn1/Ddx56/Gbp2/Tnip2/Dhx58/Scimp/Phb1/Oas1a/C1qbp/Irf7/Nfkbia/Rftn1/Igtp/Xpnpep1/Zdhhc12/Phb2/Nop53/Zc3hav1/Trim25/Tnf/Nlrx1/Casp4/Dpp9/Oasl1/Oas1g/Elp6/Ranbp2/Rab7b/Ifih1/Eif2ak2/Banf1/Hspa8
GO:0000054	ribosomal subunit export from nucleus	6.24252	8.75027e-06	0.000714653	Ltv1/Nop9/Lsg1/Npm1/Eif6/Ran/Sdad1/Rps15
GO:0033750	ribosome localization	6.24252	8.75027e-06	0.000714653	Ltv1/Nop9/Lsg1/Npm1/Eif6/Ran/Sdad1/Rps15
GO:0051604	protein maturation	1.66142	9.23921e-06	0.000742415	Ctsl/Gpaa1/Rnpep/Comp/Myc/Pigs/Ciao2a/Cdk20/Zpr1/Fkbp5/Nudc/H13/Cct5/Srgn/Cct2/Ctsh/Spon1/Psen2/Adam9/Anpep/Ctss/Afg3l2/Zng1/Hspd1/P4hb/Bola3/Hspa9/Serpine1/Eno1/Dohh/Mipep/Mvp/Cct6a/Dnajb11/Tcp1/Notch4/Cct8/Fam111a/Dnajc2/Ambp/Bola2/Pgap3/Qsox2/Casp4/Dpp9/Cct3/Bag1/Fn1/Cdc37/Il1r2/P3h1/Pdia5/Chac1/Cisd3/Hspa5/Ctla2a/Atp23/Elp6/Dnajc25/Trap1/Pgk1/Hspa2/Ranbp2/Mmp14/Glrx5/Cisd1/Wdr83os/Hspa8/Ppie/…
GO:0035458	cellular response to interferon-beta	3.20198	1.04282e-05	0.000824655	Ifi204/Ifi207/Ddx41/Gbp7/Irgm1/Gbp2/Oas1a/Ifi209/Gbp3/Igtp/Pnpt1/Ifi211/Ifit1/Ifitm2/Oas1g/Calm1/Ifi205
GO:0032102	negative regulation of response to external stimulus	1.80957	1.22515e-05	0.000953704	Socs3/Fcgr2b/Ifi207/Alox5/Siglece/Ddx39a/Nectin2/Irgm1/Cxcl13/Cers2/Dhx58/Usp18/Gba1/Oas1a/Stat3/C1qbp/Vsig4/Fgl2/Slc39a8/Stat2/Arrb2/Serpine1/Igtp/Lyar/Dusp1/Ier3/Tnf/Ilrun/Nlrx1/Apoe/Lgals9/Il22ra2/Metrnl/Gpx1/Isg15/Rps19/Tap1/Adora1/Oas1g/Parp14/Ccl2/Rtca/Ctla2a/Zfp36/Gpr31b/Sh2d1b1/Cactin/Tspan8/Ranbp2/Smpdl3b/Dusp3/Nr1h3/Banf1/Pim1
GO:0000463	maturation of LSU-rRNA from tricistronic rRNA transcript (SSU-rRNA, 5.8S rRNA, LSU-rRNA)	5.17472	1.73348e-05	0.00132865	Wdr12/Ppan/Ftsj3/Bop1/Pak1ip1/Pes1/Gtpbp4/Npm1/Znhit6
GO:0050777	negative regulation of immune response	2.08937	2.02414e-05	0.00152566	Il4ra/Fcgr2b/Ifi207/Ddx39a/Nectin2/Hfe/Irgm1/Jak3/Dhx58/Usp18/Oas1a/Vsig4/Fgl2/Stat2/Arrb2/Igtp/Lyar/Hlx/Nlrx1/Lgals9/Gpx1/Isg15/Rps19/Tap1/Oas1g/Parp14/Fcrlb/Sh2d1b1/Cactin/Ranbp2/Smpdl3b/Lgals1/Banf1/Pim1/Bcl6
GO:0002757	immune response-activating signaling pathway	1.64942	2.06701e-05	0.00152566	C5ar1/Myd88/Ifi207/Ddx41/Gusb/Ifi35/Slc19a1/Ddx39a/Nectin2/Irgm1/Trim30a/Becn1/Ddx56/Lcp2/Gbp2/Tnip2/Dhx58/Cd300lf/Ecsit/Scimp/Arf6/Phb1/Oas1a/Psen2/C3ar1/Eif2b3/C1qbp/Irf7/Wnk1/Hspd1/Nfkbia/Rftn1/Arrb2/Igtp/Xpnpep1/Zdhhc12/Phb2/Ccdc134/Cd38/Eif2b5/Cd72/Nop53/Zc3hav1/Cd14/Tlr1/App/Trim25/Tnf/Nlrx1/Casp4/Rab29/Dpp9/Oasl1/Rnf31/Tmigd3/Oas1g/Eif2b2/Elp6/Cactin/Ranbp2/Smpdl3b/Rab7b/Dusp3/Fosl2/Nr1h3/…
GO:0006417	regulation of translation	1.77686	2.0824e-05	0.00152566	Bcl3/Serp1/Pum3/Eif4ebp1/Sars1/Eif5b/C1qbp/Ifrd2/Rack1/Eef2/Shmt2/Nolc1/Ncl/Pabpc1/Mif4gd/Pa2g4/Eif5a/Abcf1/Pkm/Tpr/Xbp1/Upf3a/Ybx1/Eif2s1/Serbp1/Eif2b5/Eif3b/Nsun5/Npm1/Wfs1/Etf1/App/Bzw2/Tnf/Eif2a/Larp1/Rbm3/Piwil2/Eif6/Trnau1ap/Mtg1/Rpl5/Rps4x/Eif4g1/Trap1/Zfp36/Eprs1/Rpl38/Neurl1a/Eif2ak2/Habp4/Htatip2/Rpusd3/Pus7
GO:0002183	cytoplasmic translational initiation	3.27733	2.52458e-05	0.00182282	Eif3a/Eif4ebp1/Eif3l/Eif4a1/Eif2b3/Eif4b/Mif4gd/Eif3g/Eif2s2/Eif2b5/Eif3b/Eif3j1/Denr/Eif3i/Eif2b2
GO:0009123	nucleoside monophosphate metabolic process	2.76752	3.20018e-05	0.00227761	Impdh2/Xdh/Atic/Adsl/Hddc2/Dhodh/Shmt2/Nt5c/Rfk/Prps1/Guk1/Pals2/Nme1/Umps/Adss1/Dnph1/Gart/Nme2/Aprt
GO:0019724	B cell mediated immunity	2.40538	3.89233e-05	0.00273121	Fcgr4/Bcl3/Myd88/Il4ra/Fcgr2b/Batf/Csf2rb2/Csf2rb/Fcgr3/Nectin2/C1qb/C4b/C1qbp/Irf7/Hspd1/C1qa/Fcgr1/Pirb/Tnfsf13/C1qc/Tnf/Mad2l2/Fcrlb/Bcl6
GO:0140374	antiviral innate immune response	2.80914	4.13878e-05	0.00286381	Apobec3/Zbp1/Oasl2/Dhx58/Usp18/Phb1/Oas1a/Pde12/Atad3a/Phb2/Trim25/Tnf/Oas2/Oasl1/Marchf2/Oas1g/Ifih1/Eif2ak2
GO:0002274	myeloid leukocyte activation	1.88352	6.50796e-05	0.00444146	Cd244a/Fcgr4/C5ar1/Myd88/Il4ra/Tmem106a/Batf/Hmox1/Fcgr3/Ifi35/Rbpj/Nectin2/Sbno2/Irgm1/Ctsc/Lcp2/Tnip2/Cd300lf/Milr1/Kars1/Adam9/Vsig4/Hspd1/Pilrb1/C1qa/Pirb/Il18rap/Tnfsf9/Jmjd6/Ccl5/Tlr1/App/Tnf/Lgals9/Fn1/Adora3/Pla2g4a/Clec4d/Nr1h3/Crlf2
GO:0000154	rRNA modification	3.75527	7.63754e-05	0.00509204	Spout1/Ftsj3/Fbl/Nhp2/Nop2/Dkc1/Tsr3/Gar1/Nsun5/Mrm3/Nsun4
GO:0001819	positive regulation of cytokine production	1.60225	7.69793e-05	0.00509204	Cd244a/Bcl3/C5ar1/Myd88/Il4ra/Arid5a/Tmem106a/Cebpb/Fcgr2b/Ifi207/Cd34/Gpr65/Batf/Ddx41/Fcgr3/Arrdc4/Panx1/Ddx21/Xaf1/Dhx58/Siglec1/P2ry2/Scimp/Phb1/Oas1a/Stat3/C3ar1/Irf7/Polr3d/Hspd1/Ncl/Rftn1/Fcgr1/Trpv4/Serpine1/Xbp1/Tradd/Tnfsf9/Runx1/Tarm1/Ccl5/Zc3hav1/Cd14/Tlr1/App/Tnf/Oas2/Kpna2/Casp4/Lgals9/Sorl1/Ddx1/Rbm47/Isg15/Postn/Oas1g/Ccl2/Slc7a5/Il1r1/Kat2a/Rab7b/Ifih1/Eif2ak2/Banf1/Il1a/Crlf2
GO:0032479	regulation of type I interferon production	2.18488	7.87007e-05	0.00509204	Myd88/Ddx41/Gbp7/Arrdc4/Irgm1/Ddx56/Xaf1/Dhx58/Siglec1/Oas1a/Irf7/Polr3d/Hspd1/Tradd/Igtp/Zc3hav1/Cd14/Ilrun/Nlrx1/Oas2/Kpna2/Isg15/Oas1g/Ctps1/Cactin/Ifih1/Banf1
GO:0032606	type I interferon production	2.18488	7.87007e-05	0.00509204	Myd88/Ddx41/Gbp7/Arrdc4/Irgm1/Ddx56/Xaf1/Dhx58/Siglec1/Oas1a/Irf7/Polr3d/Hspd1/Tradd/Igtp/Zc3hav1/Cd14/Ilrun/Nlrx1/Oas2/Kpna2/Isg15/Oas1g/Ctps1/Cactin/Ifih1/Banf1
GO:0016064	immunoglobulin mediated immune response	2.34824	8.30849e-05	0.00530678	Fcgr4/Bcl3/Myd88/Il4ra/Fcgr2b/Batf/Csf2rb2/Csf2rb/Fcgr3/Nectin2/C1qb/C4b/C1qbp/Irf7/Hspd1/C1qa/Fcgr1/Tnfsf13/C1qc/Tnf/Mad2l2/Fcrlb/Bcl6
GO:0019221	cytokine-mediated signaling pathway	1.62425	8.48724e-05	0.00535233	Gpr35/Myd88/Socs3/Il4ra/Ecm1/Csf2rb2/Gusb/Csf2rb/Zbp1/Oasl2/Il15ra/Csf2ra/Irgm1/Cxcl13/Tnip2/Jak3/Ccl12/Cd300lf/Usp18/Oas1a/Lifr/Stat3/Ifitm3/Irf7/Rack1/Wnk1/Nfkbia/Eif5a/Stat2/Pirb/Parp9/Il18rap/Tradd/Igtp/Ccl5/Naip2/Hdac4/Tnf/Oas2/Nup85/Casp4/Oasl1/Rnf31/Ifitm2/Il22ra2/Ilk/Rbm47/Isg15/Cdc37/Ccl7/Il1r2/Oas1g/Parp14/Ccl2/Il1r1/Ugcg/Cactin/Ccrl2/Ifitm1/Ifih1/Il1a/Crlf2
GO:0006457	protein folding	2.02789	0.000105653	0.00657956	Zpr1/Fkbp5/Nudc/Cct5/Cct2/Hspd1/P4hb/Hspa9/Cct6a/Dnajb11/Tcp1/Cct8/Dnajc2/Qsox2/Cct3/Bag1/Cdc37/P3h1/Pdia5/Hspa5/Elp6/Dnajc25/Trap1/Hspa2/Ranbp2/Wdr83os/Hspa8/Ppie/Ppib/Sdf2l1/Ahsa2
GO:0032212	positive regulation of telomere maintenance via telomerase	4.27477	0.00010939	0.00672815	Cct5/Cct2/Dkc1/Hnrnpa1/Cct6a/Tcp1/Cct8/Cct3/Gch1
GO:0050729	positive regulation of inflammatory response	2.13739	0.000116303	0.00706611	Cebpb/Map3k8/Zbp1/Fcgr3/Ifi35/Ctsc/Gbp2/Kars1/Stat3/Ctss/Nupr1/Nfkbia/Alox5ap/Fcgr1/Trpv4/Gbp3/Serpine1/Tradd/Ccl5/App/Tnf/Casp4/Adora3/Ccl7/Rps19/Ddt/Lgals1
GO:0034341	response to type II interferon	2.16821	0.000120944	0.00725954	Gbp7/Irgm1/Gbp2/Slc26a6/Gpr146/Ifitm3/Pde12/Kif5b/Gbp3/Parp9/Igtp/Ccl5/Sp100/Tnf/Ifitm2/Gch1/Bst2/Cdc37/Zyx/Calm1/Parp14/Ccl2/Eprs1/Rab7b/Ifitm1/Pim1
GO:0071353	cellular response to interleukin-4	3.53437	0.000142704	0.00837705	Il4ra/Impdh2/Jak3/Cd300lf/Nfil3/Rplp0/Rpl3/Xbp1/Rps2/Parp14/Hspa5
GO:0007005	mitochondrion organization	1.6019	0.00014335	0.00837705	Rab32/Myc/Ucp2/Tomm40/Nectin2/Irgm1/Dap3/Man2a1/Gba1/Phb1/Stat3/Dhodh/Atad3a/Noa1/Inf2/Afg3l2/Timm8a1/Hspd1/Rcc1l/Sod2/Usp30/Stat2/Prelid1/Rab5if/Arrb2/Mtx1/Lmna/Igtp/Timm9/Pnpt1/Phb2/Eif2s1/Mcl1/Cox10/Vps13c/Pim2/Bcl2a1a/Immt/Cox18/Ier3/Acaa2/Rab29/Ttc19/Msto1/Ptcd2/Ndufaf4/Gpx1/Slc35f6/Jtb/Dnajc11/Endog/Calm1/Atp23/Mtfp1/Timm10b/Ddhd1/Coq7/Micos13/Atp5f1d/Camkmt/Bmf
GO:0035457	cellular response to interferon-alpha	4.59976	0.000145018	0.00837705	Ifi204/Myc/Oas1a/Pde12/Tpr/Ifi211/Ifit1/Oas1g
GO:0001818	negative regulation of cytokine production	1.76071	0.000146287	0.00837705	Bcl3/Fcgr2b/Cd34/Gbp7/Hmox1/Tspo/Hfe/Irgm1/Trim30a/Ddx56/Xaf1/Jak3/Dhx58/Siglec1/Sars1/Gba1/Oas1a/Srgn/Stat3/C1qbp/Vsig4/Nfkbia/Arrb2/Igtp/Tnf/Ilrun/Nlrx1/Lgals9/Rnf128/Klf4/Bst2/Fn1/Apod/Ccl7/Il1r2/Oas1g/Ctps1/Clec4a1/Nutf2/Zfp36/Sh2d1b1/Cactin/Banf1/Bcl6
GO:0002449	lymphocyte mediated immunity	1.78531	0.000150285	0.00850815	Fcgr4/Bcl3/Myd88/Slfn2/Il4ra/Arid5a/Fcgr2b/Batf/Csf2rb2/Csf2rb/Fcgr3/Nectin2/Hfe/Ctsc/Rab27a/C1qb/Ctsh/C4b/C1qbp/Irf7/Hspd1/Rftn1/C1qa/Fcgr1/Kif5b/Pirb/Tnfsf13/Arrb2/Il18rap/C1qc/Tnf/Mad2l2/Lgals9/Ripk3/Tap1/H2-D1/Fcrlb/Il1r1/Sh2d1b1/Hspa8/Bcl6/H2-T22
GO:0098760	response to interleukin-7	4.09666	0.000160886	0.009006	Jak3/Atic/Atp5f1b/Hspd1/Gipc1/P4hb/Eno1/Ybx1/Fosl2
GO:0002683	negative regulation of immune system process	1.55071	0.000182491	0.0101019	Il4ra/Cebpb/Fcgr2b/Ifi207/Myc/Hmox1/Ddx39a/Nectin2/Hfe/Irgm1/Trim30a/Id2/Jak3/Dhx58/Cd300lf/Usp18/Oas1a/Milr1/Ripor2/C1qbp/Zc3h12d/Tapbpl/Vsig4/Pilrb1/Fgl2/Stat2/Hspa9/Arrb2/Igtp/Lyar/Runx1/Zdhhc12/Tarm1/Dusp1/Cd72/C1qc/Tnf/Hlx/Nlrx1/Nme1/Lgals9/Tsc22d3/Bst2/Gpx1/Fn1/Apod/Isg15/Rps19/Tap1/Adora1/Oas1g/Parp14/Fcrlb/Ccl2/Mad1l1/Sh2d1b1/Cactin/Ranbp2/Smpdl3b/Rab7b/Dusp3/Nr1h3/Lgals1/Banf1/Hspa8/Pim1…
GO:0008033	tRNA processing	2.15048	0.000185599	0.0101611	Rtcb/Pus1/Sars1/Dus1l/Nemf/Mettl1/Rpp40/Trmt61a/Nsun2/Wdr4/Trmt1/Pusl1/Ctu1/Qtrt1/Mtfmt/Trub1/Kti12/Nsun4/Ddx1/Lsm6/Pop5/Elp6/Trp53rkb/Pop1/Pus7
GO:0070670	response to interleukin-4	3.43339	0.000191055	0.010346	Il4ra/Impdh2/Jak3/Cd300lf/Nfil3/Rplp0/Rpl3/Xbp1/Rps2/Parp14/Hspa5
GO:0009124	nucleoside monophosphate biosynthetic process	3.02165	0.000216526	0.0115993	Impdh2/Atic/Adsl/Dhodh/Shmt2/Rfk/Prps1/Nme1/Umps/Adss1/Gart/Nme2/Aprt
GO:0002443	leukocyte mediated immunity	1.64658	0.00022013	0.0116669	Fcgr4/Bcl3/Myd88/Slfn2/Il4ra/Arid5a/Fcgr2b/Batf/Csf2rb2/Hmox1/Csf2rb/Fcgr3/Nectin2/Hfe/Ctsc/Rab27a/Ddx21/Jak3/Scimp/C1qb/Milr1/Ctsh/C4b/C1qbp/Irf7/Hspd1/Rftn1/C1qa/Fcgr1/Kif5b/Pirb/Tnfsf13/Arrb2/Il18rap/C1qc/Tnf/Mad2l2/Lgals9/Ripk3/Bst2/Ddx1/Adora3/Tap1/H2-D1/Fcrlb/Ccl2/Cxcl1/Il1r1/Sh2d1b1/Hspa8/Bcl6/H2-T22
GO:0009117	nucleotide metabolic process	1.5571	0.000251404	0.0131842	Myc/Ucp2/Naprt/Oasl2/Impdh2/Tspo/Xdh/Atic/Got2/Adsl/Oas1a/Kars1/Stat3/Atp5f1b/Dhodh/Tigar/Ddit4/Shmt2/Nupr1/Slc25a22/Gpd1/Nt5c/Gars1/Rfk/Prps1/Pkm/Ndufv1/Eno1/Pgd/Mthfd1/Guk1/Pals2/Ndufa12/Macroh2a1/Mdh2/App/Hdac4/Slc2a6/Ier3/Dctpp1/Pgls/Nme1/Umps/Eif6/Nmrk1/Ran/Adss1/Dcxr/Galk1/Ctps1/Parp14/Dera/Dnph1/Gart/Pgk1/Atp5f1d/Hspa8/Noct/Ldhd/Nme2/Aprt/Ola1/Hint1
GO:0000479	endonucleolytic cleavage of tricistronic rRNA transcript (SSU-rRNA, 5.8S rRNA, LSU-rRNA)	4.77943	0.000288443	0.014969	Tbl3/Rrs1/Bop1/Rpp40/Nop9/Npm1/Rcl1
GO:0002460	adaptive immune response based on somatic recombination of immune receptors built from immunoglobulin superfamily domains	1.69517	0.000298044	0.0153078	Fcgr4/Bcl3/Myd88/Slfn2/Il4ra/Arid5a/Fcgr2b/Batf/Csf2rb2/Gadd45g/Csf2rb/Fcgr3/Il18bp/Nectin2/Hfe/Ctsc/Rab27a/Jak3/Phb1/C1qb/Ctsh/Stat3/C3ar1/C4b/C1qbp/Irf7/Hspd1/Rftn1/C1qa/Fcgr1/Pirb/Tnfsf13/C1qc/Tnf/Hlx/Mad2l2/Ripk3/H2-D1/Fcrlb/Il1r1/Pla2g4a/Lgals1/Hspa8/Bcl6/H2-T22
GO:1904358	positive regulation of telomere maintenance via telomere lengthening	3.78153	0.000324956	0.0165197	Cct5/Cct2/Dkc1/Hnrnpa1/Cct6a/Tcp1/Cct8/Cct3/Gch1
GO:1902570	protein localization to nucleolus	4.16168	0.000330581	0.0166109	Rrs1/Pinx1/Nop53/Npm1/Rrp7a/Ran/Nol8/Heatr1
GO:0034655	nucleobase-containing compound catabolic process	1.50757	0.00033805	0.0166109	Myd88/Slfn2/Arid5a/Myc/Ucp2/Apobec1/Zpr1/Ahcy/Xdh/Mrto4/Hnrnpab/Hddc2/Exosc2/Stat3/C1qbp/Lsm4/Tigar/Mettl1/Ddit4/Dkc1/Zc3h12d/Nupr1/Pde12/Nsun2/Pabpc1/Wdr4/Gpd1/Nt5c/Ddx49/Pkm/Eno1/Upf3a/Pnpt1/Ybx1/Apex1/Exosc8/Dna2/Lsm2/Zc3hav1/Npm1/Etf1/App/Hdac4/Slc2a6/Ier3/Dctpp1/Tnf/Oas2/Nsun4/Larp1/Nme1/Piwil2/Exosc4/Tbrg4/Eif6/Exosc1/Ran/Galk1/Rbm47/Endog/Lsm6/Parp14/Dera/Dnph1/Zfp36/Pgk1/Noct/Pop1/Hint1
GO:0007004	telomere maintenance via telomerase	2.89832	0.000340087	0.0166109	Cct5/Cct2/Nhp2/Dkc1/Hnrnpa1/Pinx1/Cct6a/Tcp1/Gar1/Cct8/Acd/Cct3/Gch1
GO:0043457	regulation of cellular respiration	2.89832	0.000340087	0.0166109	Myc/Oas1a/Shmt2/Nupr1/Prelid1/Trpv4/Pnpt1/Macroh2a1/Nop53/Tnf/Oas1g/Trap1/Cisd1
GO:0062207	regulation of pattern recognition receptor signaling pathway	1.90257	0.000346538	0.0167617	Myd88/Ifi207/Ifi35/Slc19a1/Irgm1/Trim30a/Gbp2/Dhx58/Cd300lf/Arf6/C1qbp/Irf7/Arrb2/Igtp/Zdhhc12/Ccdc134/Nop53/Zc3hav1/Cd14/Tlr1/App/Nlrx1/Casp4/Oasl1/Cactin/Smpdl3b/Rab7b/Nr1h3/Eif2ak2/Banf1/Hspa8
GO:0043467	regulation of generation of precursor metabolites and energy	2.05346	0.000389992	0.0186821	Myc/Rbpj/Ppp1r3d/Oas1a/Stat3/Tigar/Ddit4/Shmt2/Nupr1/Gpd1/Prelid1/Trpv4/Pnpt1/Macroh2a1/Nop53/App/Hdac4/Slc2a6/Ier3/Tnf/Eif6/Oas1g/Irs2/Trap1/Cisd1
GO:0072331	signal transduction by p53 class mediator	1.96079	0.000397736	0.0188716	Bcl3/Ifi204/Ifi207/Shisa5/Batf/Myc/Rrs1/Aen/Bop1/Pak1ip1/Nop2/Ddit4/Nupr1/Eif5a/Steap3/Wwox/Sp100/Ifi211/Nop53/Npm1/Eef1e1/Rps7/Rpl5/Cdkn1a/Bcl2l12/Rps15/Smyd2/Hint1
GO:0006278	RNA-templated DNA biosynthetic process	2.84035	0.000421602	0.0198153	Cct5/Cct2/Nhp2/Dkc1/Hnrnpa1/Pinx1/Cct6a/Tcp1/Gar1/Cct8/Acd/Cct3/Gch1
GO:2000573	positive regulation of DNA biosynthetic process	2.78466	0.000519109	0.0241701	Cct5/Cct2/C3ar1/Dkc1/Hnrnpa1/Arrb2/Cct6a/Tcp1/Cct8/Tnf/Cct3/Gch1/Rfc2
GO:2000278	regulation of DNA biosynthetic process	2.28651	0.00066702	0.0302837	Cct5/Cct2/C3ar1/Dkc1/Hnrnpa1/Pinx1/Arrb2/Cct6a/Tcp1/Dusp1/Cct8/Acd/Dnajc2/Tnf/Cct3/Gch1/Cdkn1a/Rfc2
GO:0032480	negative regulation of type I interferon production	2.84985	0.000673856	0.0302837	Gbp7/Irgm1/Ddx56/Xaf1/Dhx58/Siglec1/Igtp/Ilrun/Nlrx1/Ctps1/Cactin/Banf1
GO:0046037	GMP metabolic process	3.7998	0.000674728	0.0302837	Impdh2/Xdh/Atic/Adsl/Guk1/Pals2/Gart/Aprt
GO:0098761	cellular response to interleukin-7	3.7998	0.000674728	0.0302837	Jak3/Atic/Atp5f1b/Hspd1/Gipc1/P4hb/Eno1/Ybx1
GO:0009126	purine nucleoside monophosphate metabolic process	3.00422	0.000691079	0.0304686	Impdh2/Xdh/Atic/Adsl/Nt5c/Guk1/Pals2/Adss1/Dnph1/Gart/Aprt
GO:0032210	regulation of telomere maintenance via telomerase	3.00422	0.000691079	0.0304686	Cct5/Cct2/Dkc1/Hnrnpa1/Pinx1/Cct6a/Tcp1/Cct8/Acd/Cct3/Gch1
GO:1902369	negative regulation of RNA catabolic process	2.26022	0.000770493	0.0335285	Myd88/Slfn2/Arid5a/Apobec1/Hnrnpab/Stat3/Mettl1/Dkc1/Nsun2/Pabpc1/Wdr4/Upf3a/Ybx1/Tnf/Larp1/Rbm47/Zfp36/Noct
GO:0009895	negative regulation of catabolic process	1.57867	0.000773941	0.0335285	Hcar2/Myd88/Slfn2/Arid5a/Hmox1/Apobec1/Tspo/Hfe/Becn1/Hnrnpab/Phb1/Psen2/Stat3/Tigar/Mettl1/Ddit4/Dkc1/Usp36/Nupr1/Wnk1/Nsun2/Pabpc1/Gipc1/Wdr4/Usp30/Ddrgk1/Uchl5/Upf3a/Ybx1/Itga5/Mcl1/Vps13c/Nop53/Hdac4/Ier3/Tnf/Tbc1d14/Larp1/Mad2l2/Sorl1/Rps7/Rbm47/Fn1/Rpl5/Adora1/Eif4g1/Slc7a5/Zfp36/Noct/Bmf
GO:0046496	nicotinamide nucleotide metabolic process	1.85268	0.000825303	0.0354453	Myc/Ucp2/Naprt/Got2/Stat3/Tigar/Ddit4/Nupr1/Slc25a22/Gpd1/Prps1/Pkm/Eno1/Pgd/Macroh2a1/Mdh2/App/Hdac4/Slc2a6/Ier3/Pgls/Eif6/Nmrk1/Ran/Dcxr/Galk1/Parp14/Pgk1/Noct
GO:0000028	ribosomal small subunit assembly	4.02479	0.000993965	0.0418818	Rcc1l/Rpsa/Pwp2/Rrp7a/Rps6/Rps19/Rps15
GO:0046040	IMP metabolic process	4.02479	0.000993965	0.0418818	Xdh/Atic/Adsl/Nt5c/Adss1/Gart/Aprt
GO:0010833	telomere maintenance via telomere lengthening	2.50724	0.00100039	0.0418818	Cct5/Cct2/Nhp2/Dkc1/Hnrnpa1/Pinx1/Cct6a/Tcp1/Gar1/Dclre1b/Cct8/Acd/Cct3/Gch1
GO:0019835	cytolysis	5.46221	0.00108476	0.0446632	Gbp7/Gbp2/Gbp3/Igtp/Pim1
GO:0031126	sno(s)RNA 3'-end processing	5.46221	0.00108476	0.0446632	Fbl/Exosc2/Dkc1/Exosc4/Larp7
GO:0009156	ribonucleoside monophosphate biosynthetic process	3.03456	0.00110347	0.0450615	Impdh2/Atic/Adsl/Dhodh/Rfk/Prps1/Umps/Adss1/Gart/Aprt
GO:0032481	positive regulation of type I interferon production	2.13983	0.00112239	0.0454614	Myd88/Ddx41/Arrdc4/Xaf1/Dhx58/Siglec1/Oas1a/Irf7/Polr3d/Hspd1/Tradd/Zc3hav1/Cd14/Oas2/Kpna2/Isg15/Oas1g/Ifih1/Banf1
GO:0043414	macromolecule methylation	2.18488	0.00116729	0.0468986	Spout1/Setd6/Ftsj3/Eef2kmt/Prmt5/Fbl/Nop2/Mettl1/Trmt61a/Nsun2/Wdr4/Trmt1/Nsun5/Mrm3/Nsun4/Ntmt1/Larp7/Smyd2
GO:0006879	intracellular iron ion homeostasis	2.4668	0.00118531	0.0472419	Trf/Slc39a14/Myc/Hmox1/Hfe/Fth1/Mecr/Slc39a8/Steap3/Ccdc115/Nubp1/Bola2/Cisd1/Ftl1
GO:0006163	purine nucleotide metabolic process	1.5165	0.0012596	0.0490929	Myc/Ucp2/Naprt/Oasl2/Impdh2/Tspo/Xdh/Atic/Got2/Adsl/Oas1a/Stat3/Atp5f1b/Tigar/Ddit4/Nupr1/Slc25a22/Gpd1/Nt5c/Prps1/Pkm/Ndufv1/Eno1/Pgd/Mthfd1/Guk1/Pals2/Ndufa12/Macroh2a1/Mdh2/App/Hdac4/Slc2a6/Ier3/Pgls/Nme1/Eif6/Nmrk1/Ran/Adss1/Dcxr/Galk1/Parp14/Dnph1/Gart/Pgk1/Atp5f1d/Hspa8/Noct/Ldhd/Nme2/Aprt/Ola1/Hint1
GO:0016226	iron-sulfur cluster assembly	3.49581	0.00126132	0.0490929	Xdh/Bola3/Hspa9/Nubp1/Bola2/Nubp2/Ciapin1/Glrx5
GO:0031163	metallo-sulfur cluster assembly	3.49581	0.00126132	0.0490929	Xdh/Bola3/Hspa9/Nubp1/Bola2/Nubp2/Ciapin1/Glrx5
