# Supplementary material
Source: Research Square preprint supplement (doi:10.21203/rs.3.rs-10072088/v1)
Supplement: Supplementary file 8 [file 94b27952de0399086c609c83.xlsx]

## Sheet: CBD-deltaLPS_GSEA
CBD effects: Microglia deltaLPS_GSEA-GO:BP							CBD effects: Microglia deltaLPS_GSEA-KEGG
ID	Description	NES	pvalue	p.adjust	core_enrichment_symbols		ID	Description	NES	pvalue	p.adjust	core_enrichment_symbols
GO:0015986	proton motive force-driven ATP synthesis	3.20241	1e-10	2.08926e-08	Atp5me/Sdhb/Ndufa1/Ndufa5/Ndufa7/Ndufa2/Atp5mf/Atp5f1e/Atp5pf/Ndufc2/Ndufb7/Ndufb11/Atp5mc2/Ndufa13/Ndufa6/Ndufs2/Ndufa3/Ndufb3/Ndufs6/Ndufa11/Ndufs4/Ndufa9/Ndufv3/Ndufb8/Ndufb1/Atp5f1c/Ndufb5/Ndufb4/Ndufv2/Sdhd/Atp5pd/Atp5mc3/Ndufc1/Ndufb9/Atp5if1/Atp5mg/Atp5po/Atp5f1d/Atp5pb/Ndufb10/Ndufb6/Ndufa8/Ndufs5/Ndufs7/Atp5mc1/Ndufs8/Antkmt/Ndufab1		mmu00190	Oxidative phosphorylation	3.17228	1e-10	3.19091e-09	Atp5me/Sdhb/Ndufa1/Uqcr11/Ndufa5/Ndufa7/Cox6b1/Ndufa2/Atp5mf/Atp6v1c1/Cox6c/Lhpp/Atp5f1e/Atp5pf/Ndufc2/Uqcr10/Ndufb7/Ndufb11/Atp5mc2/Cox6a1/Ndufa13/Cox4i1/Cox8a/Ndufa6/Ndufs2/Cox7a2/Ndufa3/Ndufb3/Ndufa4/Ndufs6/Ndufa11/Atp6v0e2/Ndufs4/Atp6v1f/Cox5b/Ndufa9/Ndufv3/Ndufb8/Ndufb1/Uqcrq/Uqcrb/Cox7b/Cox4i2/Atp5f1c/Uqcrh/Ndufb5/Ndufb4c/Ndufb4b/Ndufb4/Ndufv2/Sdhd/Atp5pd/Atp5mc3/Ndufc1/Ndufb9/Atp5mg/Atp5po…
GO:0042776	proton motive force-driven mitochondrial ATP synthesis	3.12769	1e-10	2.08926e-08	Atp5me/Sdhb/Ndufa1/Ndufa5/Ndufa7/Ndufa2/Atp5mf/Atp5f1e/Atp5pf/Ndufc2/Ndufb7/Ndufb11/Ndufa13/Ndufa6/Ndufs2/Ndufa3/Ndufb3/Ndufs6/Ndufa11/Ndufs4/Ndufa9/Ndufv3/Ndufb8/Ndufb1/Atp5f1c/Ndufb5/Ndufb4/Ndufv2/Sdhd/Atp5pd/Ndufc1/Ndufb9/Atp5if1/Atp5po/Atp5f1d/Atp5pb/Ndufb10/Ndufb6/Ndufa8/Ndufs5/Ndufs7/Ndufs8/Antkmt/Ndufab1		mmu03010	Ribosome	3.03966	1e-10	3.19091e-09	Mrpl14/Rps29/Rpl41/Mrpl39/Rpl34-ps1/Mrpl34/Rps12/Mrps11/Mrps18c/Mrpl43/Rpl37a/Mrps21/Rpl38/Rpl35/Rplp1/Rplp2/Rps17/Rpl36/Mrpl44/Mrps33/Mrps15/Rps27/Rps26/Rpl39/Rps27rt/Rps21/Rpl32/Rpl31/Rps19/Rps14/Rpl37rt/Rpl37/Mrpl42/Rpl35a/Mrpl51/Rpl36a/Rpl26/Mrpl18/Mrpl27/Mrpl48/Rps13/Rps15a/Mrps36/Rpl27a/Mrps16/Gm15682/Rpl28/Fau/Rpl18a/Rps23/Rps3/Rps11/Rps15/Mrpl13/Mrps14/Rpl7/Rpl13-ps6/Rps25/Mrpl22/Rps18/Rp…
GO:0006119	oxidative phosphorylation	3.07478	1e-10	2.08926e-08	Cdk1/Atp5me/Sdhb/Ndufa1/Uqcr11/Ndufa5/Ndufa7/Cox6b1/Ndufa2/Atp5mf/Cox6c/Atp5f1e/Atp5pf/Ndufc2/Uqcr10/Ndufb7/Ndufb11/Cox6a1/Ndufa13/Cox4i1/Cox8a/Dguok/Ndufa6/Ndufs2/Cox7a2/Ndufa3/Ndufb3/Ndufs6/Ndufa11/Ndufs4/Cox5b/Ndufa9/Ndufv3/Ndufb8/Ndufb1/Uqcrq/Uqcrb/Cox7b/Chchd2/Cox4i2/Atp5f1c/Uqcrh/Ndufb5/Ndufb4/Ndufv2/Sdhd/Tefm/Atp5pd/Ndufc1/Ndufb9/Atp5if1/Uqcc2/Park7/Atp5po/Cox6a2/Cox7c/Atp5f1d/Cox6b2/Dnajc…		mmu03008	Ribosome biogenesis in eukaryotes	-2.70158	1e-10	3.19091e-09	Gar1/Bms1/Nxf1/Nmd3/Utp14b/Afg2a/Nvl/Mdn1/Riok2/Rexo1/Rpp40/Efl1/Dkc1/Gtpbp4/Tcof1/Utp15/Xpo1/Xrn2/Rrp7a/Utp6/Nat10/Utp18/Nol6/Nob1/Tbl3/Wdr36/Utp14a/Lsg1/Wdr3/Gnl2/Heatr1/Nop58/Nop56/Pwp2/Wdr43/Riok1/Utp4/Gnl3/Mphosph10/Wdr75
GO:0006754	ATP biosynthetic process	2.89029	1e-10	2.08926e-08	Trem2/Atp5me/Sdhb/Ndufa1/Ndufa5/Ndufa7/Ndufa2/Atp5mf/Atp5f1e/Atp5pf/Ndufc2/Ndufb7/Ndufb11/Tmsb4x/Atp5mc2/Ndufa13/Ndufa6/Ndufs2/Ndufa3/Ndufb3/Ndufs6/Ndufa11/Ndufs4/Ndufa9/Ndufv3/Ndufb8/Ndufb1/Lipa/Atp5f1c/Tgfb1/Ndufb5/Ndufb4/Ndufv2/Sdhd/Atp5pd/Atp5mc3/Ndufc1/Ndufb9/Atp5if1/Atp5mg/Atp5po/Atp5f1d/Atp5pb/Ndufb10/Ndufb6/Ndufa8/Ndufs5/Ndufs7/Aldoa/Atp5mc1/Ndufs8/Antkmt/Uqcc3/Ndufab1		mmu05020	Prion disease	2.51183	1e-10	3.19091e-09	Cav2/Sod1/Mapk3/Sdhb/Ndufa1/Klc4/Tubb2b/Uqcr11/Ndufa5/Ndufa7/Cox6b1/Ndufa2/Cav1/Cox6c/Atp5f1e/Atp5pf/Ndufc2/Uqcr10/Ndufb7/Ndufb11/Atp5mc2/Cox6a1/Ndufa13/Cox4i1/Cox8a/Psmb6/Tubb5/Ndufa6/Ndufs2/Cox7a2/Ndufa3/Ndufb3/Ndufa4/Ndufs6/Ndufa11/Ndufs4/Cox5b/Cyba/Ndufa9/Psmc3/Ndufv3/Ndufb8/Mapk12/Ndufb1/Tubb2a/Uqcrq/Uqcrb/Cox7b/Psma1/Cox4i2/Atp5f1c/Uqcrh/Ndufb5/Ndufb4c/Ndufb4b/Ndufb4/Ndufv2/Sdhd/Sem1/Slc25a…
GO:0042775	mitochondrial ATP synthesis coupled electron transport	2.88099	1e-10	2.08926e-08	Cdk1/Sdhb/Uqcr11/Ndufa7/Ndufc2/Uqcr10/Cox6a1/Cox4i1/Cox8a/Dguok/Ndufs2/Cox7a2/Ndufs6/Ndufa11/Cox5b/Ndufv3/Ndufb8/Uqcrq/Uqcrb/Cox7b/Chchd2/Cox4i2/Uqcrh/Ndufv2/Sdhd/Ndufb9/Park7/Cox6a2/Cox7c/Dnajc15/Ndufb6/Mtch2/Ndufa8/Ndufs7/Ndufs8/Snca/Uqcc3/Uqcrfs1/Coq7/Uqcrc1/Cox5a/Ndufs3/Iscu/Uqcrc2/mt-Co3/Ccnb1		mmu05415	Diabetic cardiomyopathy	2.48921	1e-10	3.19091e-09	Mmp2/Sdhb/Ndufa1/Uqcr11/Ndufa5/Ndufa7/Cox6b1/Ndufa2/Cox6c/Atp5f1e/Atp5pf/Ndufc2/Uqcr10/Ndufb7/Ndufb11/Atp5mc2/Cox6a1/Ndufa13/Cox4i1/Cox8a/Mpc2/Ndufa6/Ndufs2/Cox7a2/Ndufa3/Ndufb3/Ndufa4/Ndufs6/Ndufa11/Ndufs4/Cox5b/Cyba/Ndufa9/Ndufv3/Ndufb8/Mapk12/Ndufb1/Uqcrq/Uqcrb/Cox7b/Cox4i2/Atp5f1c/Uqcrh/Tgfb1/Ndufb5/Ndufb4c/Ndufb4b/Ndufb4/Atp2a1/Ndufv2/Sdhd/Slc25a4/Atp5pd/Atp5mc3/Ndufc1/Ndufb9/Atp5po/Cox6a2/C…
GO:0042773	ATP synthesis coupled electron transport	2.86635	1e-10	2.08926e-08	Cdk1/Sdhb/Uqcr11/Ndufa7/Ndufc2/Uqcr10/Cox6a1/Cox4i1/Cox8a/Dguok/Ndufs2/Cox7a2/Ndufs6/Ndufa11/Cox5b/Ndufv3/Ndufb8/Uqcrq/Uqcrb/Cox7b/Chchd2/Cox4i2/Uqcrh/Ndufv2/Sdhd/Ndufb9/Park7/Cox6a2/Cox7c/Dnajc15/Ndufb6/Mtch2/Ndufa8/Ndufs7/Ndufs8/Snca/Uqcc3/Uqcrfs1/Coq7/Uqcrc1/Cox5a/Ndufs3/Iscu/Uqcrc2/mt-Co3/Ccnb1		mmu05012	Parkinson disease	2.47229	1e-10	3.19091e-09	Ube2l6/Slc39a4/Sod1/Gnas/Mapt/Sdhb/Ndufa1/Klc4/Tubb2b/Uqcr11/Ndufa5/Ndufa7/Cox6b1/Ndufa2/Cox6c/Atp5f1e/Atp5pf/Ndufc2/Txn1/Calm2/Uqcr10/Ndufb7/Ndufb11/Atp5mc2/Trp53/Cox6a1/Ndufa13/Cox4i1/Cox8a/Psmb6/Tubb5/Ndufa6/Ndufs2/Cox7a2/Ndufa3/Ndufb3/Ndufa4/Ndufs6/Ndufa11/Ndufs4/Cox5b/Ndufa9/Psmc3/Ndufv3/Ndufb8/Ndufb1/Tubb2a/Uqcrq/Uqcrb/Cox7b/Psma1/Cox4i2/Atp5f1c/Uqcrh/Ndufb5/Ndufb4c/Ndufb4b/Ndufb4/Ndufv2/Sd…
GO:0009206	purine ribonucleoside triphosphate biosynthetic process	2.80738	1e-10	2.08926e-08	Trem2/Atp5me/Sdhb/Ndufa1/Ndufa5/Ndufa7/Ndufa2/Atp5mf/Atp5f1e/Atp5pf/Ndufc2/Ndufb7/Ndufb11/Tmsb4x/Atp5mc2/Ndufa13/Ndufa6/Ndufs2/Ndufa3/Ndufb3/Ndufs6/Ndufa11/Ndufs4/Ndufa9/Ndufv3/Ndufb8/Ndufb1/Lipa/Atp5f1c/Tgfb1/Ndufb5/Ndufb4/Ndufv2/Sdhd/Atp5pd/Atp5mc3/Ndufc1/Ndufb9/Atp5if1/Atp5mg/Atp5po/Atp5f1d/Atp5pb/Ndufb10/Nme7/Ndufb6/Ndufa8/Ndufs5/Ndufs7/Aldoa/Atp5mc1/Ndufs8/Antkmt/Uqcc3/Ndufab1		mmu05208	Chemical carcinogenesis - reactive oxygen species	2.4471	1e-10	3.19091e-09	Gstm5/Sod1/Mapk3/As3mt/Sdhb/Mgst3/Ndufa1/Uqcr11/Ndufa5/Ndufa7/Cox6b1/Ndufa2/Cox6c/Gstm4/Atp5f1e/Akr1a1/Atp5pf/Ndufc2/Cbr1/Uqcr10/Ndufb7/Ndufb11/Atp5mc2/Cox6a1/Ndufa13/Cox4i1/Cox8a/Ndufa6/Ndufs2/Cox7a2/Gsto2/Ndufa3/Ndufb3/Ndufa4/Ndufs6/Ndufa11/Ndufs4/Cox5b/Cyba/Ndufa9/Ndufv3/Ndufb8/Mapk12/Ndufb1/Uqcrq/Uqcrb/Cox7b/Cox4i2/Atp5f1c/Cat/Uqcrh/Ndufb5/Ndufb4c/Ndufb4b/Ndufb4/Ndufv2/Sdhd/Gstt1/Slc25a4/Atp5…
GO:0009145	purine nucleoside triphosphate biosynthetic process	2.80684	1e-10	2.08926e-08	Trem2/Atp5me/Sdhb/Ndufa1/Ndufa5/Ndufa7/Ndufa2/Atp5mf/Atp5f1e/Atp5pf/Ndufc2/Ndufb7/Ndufb11/Tmsb4x/Atp5mc2/Ndufa13/Ndufa6/Ndufs2/Ndufa3/Ndufb3/Ndufs6/Ndufa11/Ndufs4/Ndufa9/Ndufv3/Ndufb8/Ndufb1/Lipa/Atp5f1c/Tgfb1/Ndufb5/Ndufb4/Ndufv2/Sdhd/Atp5pd/Adk/Atp5mc3/Ndufc1/Ndufb9/Atp5if1/Atp5mg/Atp5po/Atp5f1d/Atp5pb/Ndufb10/Nme7/Ndufb6/Ndufa8/Ndufs5/Ndufs7/Aldoa/Atp5mc1/Ndufs8/Antkmt/Uqcc3/Ndufab1		mmu04723	Retrograde endocannabinoid signaling	2.43554	1e-10	3.19091e-09	Mapk3/Adcy8/Mgll/Abhd6/Gria1/Ndufa1/Ndufa5/Gng11/Ndufa7/Ndufa2/Gngt2/Ndufc2/Ndufb7/Ndufb11/Ndufa13/Ndufa6/Ndufs2/Ndufa3/Gnb5/Ndufb3/Ndufa4/Ndufs6/Ndufa11/Ndufs4/Ndufa9/Ndufv3/Ndufb8/Mapk12/Ndufb1/Gng5/Ndufb5/Ndufb4c/Ndufb4b/Ndufb4/Ndufv2/Ndufc1/Ndufb9/Ndufb10/Ndufb6/Ndufa8/Ndufs5/Ndufs7/Gabrb1/Ndufs8
GO:0009142	nucleoside triphosphate biosynthetic process	2.77594	1e-10	2.08926e-08	Ak1/Trem2/Atp5me/Sdhb/Ndufa1/Ndufa5/Ndufa7/Ndufa2/Atp5mf/Atp5f1e/Atp5pf/Tyms/Ndufc2/Ndufb7/Ndufb11/Tmsb4x/Atp5mc2/Ndufa13/Ndufa6/Ndufs2/Ndufa3/Ndufb3/Ndufs6/Ndufa11/Ndufs4/Ndufa9/Ndufv3/Ndufb8/Ndufb1/Lipa/Atp5f1c/Tgfb1/Ndufb5/Ndufb4/Ndufv2/Sdhd/Atp5pd/Adk/Atp5mc3/Ndufc1/Ndufb9/Atp5if1/Atp5mg/Atp5po/Atp5f1d/Atp5pb/Ndufb10/Nme7/Ndufb6/Ak4/Ndufa8/Ndufs5/Ndufs7/Aldoa/Atp5mc1/Ndufs8/Antkmt/Uqcc3/Ndufa…		mmu05016	Huntington disease	2.42773	1e-10	3.19091e-09	Sod1/Sdhb/Gria1/Ndufa1/Klc4/Tubb2b/Uqcr11/Ndufa5/Ndufa7/Cox6b1/Ndufa2/Cox6c/Atp5f1e/Atp5pf/Ndufc2/Uqcr10/Ndufb7/Ndufb11/Atp5mc2/Trp53/Cox6a1/Ndufa13/Cox4i1/Casp8/Cox8a/Psmb6/Tubb5/Ndufa6/Ndufs2/Cox7a2/Ndufa3/Ndufb3/Ndufa4/Polr2k/Ndufs6/Ndufa11/Ndufs4/Cox5b/Ndufa9/Psmc3/Ndufv3/Ndufb8/Ndufb1/Polr2j/Tubb2a/Uqcrq/Uqcrb/Cox7b/Dnal4/Psma1/Cox4i2/Atp5f1c/Uqcrh/Ndufb5/Slc1a2/Ndufb4c/Ndufb4b/Ndufb4/Ndufv2…
GO:0019646	aerobic electron transport chain	2.7635	1e-10	2.08926e-08	Sdhb/Uqcr11/Ndufa7/Ndufc2/Uqcr10/Cox6a1/Cox4i1/Cox8a/Ndufs2/Cox7a2/Ndufs6/Ndufa11/Cox5b/Ndufb8/Uqcrq/Uqcrb/Cox7b/Cox4i2/Uqcrh/Ndufv2/Sdhd/Ndufb9/Park7/Cox6a2/Cox7c/Dnajc15/Ndufb6/Ndufa8/Ndufs7/Ndufs8/Uqcc3/Uqcrfs1/Uqcrc1/Cox5a/Ndufs3/Iscu/Uqcrc2/mt-Co3		mmu04714	Thermogenesis	2.42741	1e-10	3.19091e-09	Gnas/Adcy8/Mgll/Atp5me/Sdhb/Ndufaf7/Ndufa1/Uqcr11/Ndufa5/Ndufa7/Cox6b1/Ndufa2/Atp5mf/Cox6c/Atp5f1e/Atp5pf/Ndufc2/Uqcr10/Ndufaf2/Ndufb7/Ndufb11/Atp5mc2/Cox6a1/Ndufa13/Cox4i1/Cox8a/Coa3/Ndufa6/Ndufs2/Cox7a2/Ndufa3/Ndufb3/Ndufa4/Ndufs6/Ndufa11/Ndufs4/Cox5b/Ndufa9/Ndufv3/Ndufb8/Mapk12/Ndufb1/Uqcrq/Uqcrb/Cox7b/Arid1a/Cox4i2/Atp5f1c/Uqcrh/Ndufb5/Ndufb4c/Ndufb4b/Ndufb4/Ndufv2/Sdhd/Atp5pd/Atp5mc3/Ndufc1/…
GO:0022904	respiratory electron transport chain	2.72381	1e-10	2.08926e-08	Cdk1/Sdhb/Uqcr11/Ndufa5/Ndufa7/Ndufc2/Uqcr10/Cox6a1/Cox4i1/Cox8a/Dguok/Ndufs2/Cox7a2/Ndufs6/Ndufa11/Ndufs4/Cox5b/Ndufv3/Ndufb8/Uqcrq/Uqcrb/Cox7b/Chchd2/Cox4i2/Uqcrh/Ndufv2/Sdhd/Ndufb9/Park7/Cox6a2/Cox7c/Dnajc15/Ndufb6/Mtch2/Ndufa8/Ndufs7/Ndufs8/Snca/Etfa/Uqcc3/Uqcrfs1/Coq7/Uqcrc1/Cox5a/Ndufs3/Iscu/Uqcrc2/Pum2/Immp2l/mt-Co3/Etfb/Ccnb1		mmu05014	Amyotrophic lateral sclerosis	2.03577	1e-10	3.19091e-09	Sod1/Sdhb/Gria1/Ndufa1/Klc4/Tubb2b/Uqcr11/Ndufa5/Ndufa7/Cox6b1/Ndufa2/Cox6c/Atp5f1e/Atp5pf/Ndufc2/Nup37/Uqcr10/Ndufb7/Ndufb11/Atp5mc2/Trp53/Cox6a1/Ndufa13/Cox4i1/Cox8a/Psmb6/Tubb5/Ndufa6/Ndufs2/Map1lc3a/Cox7a2/Ndufa3/Ndufb3/Ndufa4/Ndufs6/Ndufa11/Ndufs4/Cox5b/Nup35/Ndufa9/Psmc3/Ndufv3/Ndufb8/Mapk12/Ndufb1/Tubb2a/Uqcrq/Uqcrb/Cox7b/Dnal4/Psma1/Cox4i2/Atp5f1c/Cat/Uqcrh/Ndufb5/Slc1a2/Ndufb4c/Ndufb4b/N…
GO:0009201	ribonucleoside triphosphate biosynthetic process	2.69278	1e-10	2.08926e-08	Trem2/Atp5me/Sdhb/Ndufa1/Ndufa5/Ndufa7/Ndufa2/Atp5mf/Atp5f1e/Atp5pf/Ndufc2/Ndufb7/Ndufb11/Tmsb4x/Atp5mc2/Ndufa13/Ndufa6/Ndufs2/Ndufa3/Ndufb3/Ndufs6/Ndufa11/Ndufs4/Ndufa9/Ndufv3/Ndufb8/Ndufb1/Lipa/Atp5f1c/Tgfb1/Ndufb5/Ndufb4/Ndufv2/Sdhd/Atp5pd/Atp5mc3/Ndufc1/Ndufb9/Atp5if1/Atp5mg/Atp5po/Atp5f1d/Atp5pb/Ndufb10/Nme7/Ndufb6/Ndufa8/Ndufs5/Ndufs7/Aldoa/Atp5mc1/Ndufs8/Antkmt/Uqcc3/Ndufab1		mmu05022	Pathways of neurodegeneration - multiple diseases	1.95838	1.50986e-10	4.41633e-09	Ube2l6/Sod1/Mapk3/Mapt/Sdhb/Gria1/Ndufa1/Klc4/Tubb2b/Uqcr11/Ndufa5/Ndufa7/Cox6b1/Ndufa2/Cox6c/Atp5f1e/Atp5pf/Ndufc2/Calm2/Uqcr10/Ndufb7/Ndufb11/Atp5mc2/Cox6a1/Ndufa13/Fzd1/Casp7/Cox4i1/Casp8/Cox8a/Psmb6/Tubb5/Ndufa6/Ndufs2/Map1lc3a/Cox7a2/Ndufa3/Ndufb3/Ndufa4/Ndufs6/Ndufa11/Atxn1/Ndufs4/Cox5b/Hsd17b10/Ndufa9/Psmc3/Ndufv3/Ndufb8/Mapk12/Ndufb1/Tubb2a/Uqcrq/Uqcrb/Cox7b/Dnal4/Psma1/Cox4i2/Atp5f1c/Cat…
GO:0042254	ribosome biogenesis	-2.66128	1e-10	2.08926e-08	Rrp1/Pdcd11/Ercc2/Rbm10/Nop16/Mrm3/Esf1/Nmd3/Ebna1bp2/Ddx18/Utp14b/Isg20l2/Urb2/Mtrex/Afg2a/Nvl/Exosc10/Mdn1/Srfbp1/Mrps2/Tfb2m/Mettl17/Bysl/Riok2/Sart1/Nol11/Nop9/Zcchc4/Fsaf1/Cul4a/Ipo4/Exosc2/Usp16/Pten/Rexo1/Mak16/Rpp40/Efl1/Riox1/Ddx31/Ddx56/Dnttip2/Dimt1/Dhx29/Dkc1/Gtpbp4/Mettl16/Noa1/Eif5/Utp15/Utp20/Ddx55/Ncl/Noc4l/Xpo1/Pwp1/Wdr12/Riox2/Nol10/Riok3/Airim/Mrto4/Spout1/Rcc1l/Zfp593/Tsr1/Rrp…		mmu04932	Non-alcoholic fatty liver disease	2.27605	8.57441e-10	2.31509e-08	Sdhb/Ndufa1/Uqcr11/Ndufa5/Ndufa7/Cox6b1/Ndufa2/Cox6c/Ndufc2/Uqcr10/Ndufb7/Ndufb11/Cox6a1/Ndufa13/Casp7/Cox4i1/Casp8/Cox8a/Ndufa6/Ndufs2/Cox7a2/Ndufa3/Ndufb3/Ndufa4/Ndufs6/Ndufa11/Ndufs4/Cox5b/Ndufa9/Ndufv3/Ndufb8/Mapk12/Ndufb1/Uqcrq/Uqcrb/Cox7b/Cox4i2/Uqcrh/Tgfb1/Ndufb5/Ndufb4c/Ndufb4b/Ndufb4/Ndufv2/Sdhd/Ndufc1/Ndufb9/Cox6a2/Cox7c/Cox6b2/Ndufb10/Ndufb6/Ndufa8/Ndufs5/Akt3/Casp3/Ndufs7/Ndufs8/Cyp2e…
GO:0022900	electron transport chain	2.6402	1e-10	2.08926e-08	Cdk1/Sdhb/Uqcr11/Ndufa5/Ndufa7/Ndufc2/Uqcr10/Cox6a1/Cox4i1/Cox8a/Dguok/Ndufs2/Cox7a2/Ndufb3/Ndufs6/Ndufa11/Ndufs4/Cox5b/Ndufv3/Ndufb8/Uqcrq/Uqcrb/Cox7b/Chchd2/Cox4i2/Uqcrh/Ndufv2/Sdhd/Ndufb9/Park7/Cox6a2/Cox7c/Dnajc15/Ndufb6/Mtch2/Ndufa8/Ndufs7/Ndufs8/Snca/Etfa/Uqcc3/Uqcrfs1/Coq7/Uqcrc1/Cox5a/Ndufs3/Iscu/Uqcrc2/Pum2/Immp2l/mt-Co3/Etfb/Ccnb1/Fdx1		mmu05010	Alzheimer disease	1.97796	1.6323e-09	4.09241e-08	Slc39a4/Mapk3/Mapt/Lpl/Sdhb/Ndufa1/Klc4/Tubb2b/Uqcr11/Ndufa5/Ndufa7/Cox6b1/Ndufa2/Cox6c/Atp5f1e/Atp5pf/Ndufc2/Calm2/Uqcr10/Ndufb7/Ndufb11/Atp5mc2/Cox6a1/Ndufa13/Fzd1/Casp7/Cox4i1/Casp8/Cox8a/Psmb6/Tubb5/Ndufa6/Ndufs2/Cox7a2/Ndufa3/Ndufb3/Ndufa4/Ndufs6/Ndufa11/Ndufs4/Cox5b/Hsd17b10/Ndufa9/Psmc3/Ndufv3/Ndufb8/Ndufb1/Tubb2a/Uqcrq/Uqcrb/Cox7b/Psma1/Cox4i2/Atp5f1c/Uqcrh/Ndufb5/Ndufb4c/Ndufb4b/Ndufb4/A…
GO:0009152	purine ribonucleotide biosynthetic process	2.56558	1e-10	2.08926e-08	Ak1/Trem2/Adcy8/Gmpr/Atp5me/Sdhb/Ndufa1/Ndufa5/Ndufa7/Ndufa2/Papss1/Atp5mf/Ptger3/Atp5f1e/Atp5pf/Ndufc2/Ndufb7/Ndufb11/Tmsb4x/Atp5mc2/Ndufa13/Ndufa6/Ndufs2/Ndufa3/Ndufb3/Ndufs6/Ndufa11/Ndufs4/Ndufa9/Ndufv3/Ndufb8/Ndufb1/Lipa/Atp5f1c/Tgfb1/Ndufb5/Ndufb4/Ndufv2/Sdhd/Atp5pd/Adk/Atp5mc3/Ndufc1/Ndufb9/Atp5if1/Atp5mg/Atp5po/Atp5f1d/Atp5pb/Ndufb10/Nme7/Ndufb6/Ak4/Ndufa8/Ndufs5/Ndufs7/Hprt1/Aldoa/Atp5mc1…		mmu04260	Cardiac muscle contraction	2.37678	5.0089e-08	1.17208e-06	Tpm2/Uqcr11/Cox6b1/Cox6c/Uqcr10/Cox6a1/Cox4i1/Cox8a/Cacnb1/Cox7a2/Cox5b/Uqcrq/Uqcrb/Cox7b/Atp1a2/Cox4i2/Uqcrh/Atp2a1/Atp1b3/Cox6a2/Cox7c/Cox6b2/Cacna2d3/Uqcrfs1/Uqcrc1/Cox5a/Uqcrc2/Atp1b2/Fxyd2/mt-Co3
GO:0022613	ribonucleoprotein complex biogenesis	-2.4945	1e-10	2.08926e-08	Eif3j1/Gm23303/Rrp1/Pdcd11/Ercc2/Rbm10/Nop16/Mrm3/Esf1/Nmd3/Rbmx/Ebna1bp2/Ddx18/Utp14b/Isg20l2/Prpf18/Usp4/Urb2/Mtrex/Afg2a/Nvl/Exosc10/Ago2/Eif3a/Shq1/Mdn1/Usp39/Srfbp1/Mrps2/Tfb2m/Mettl17/Bysl/Ddx42/Riok2/Sart1/Nol11/Gm24924/Nop9/Sf3a1/Ythdc1/Zcchc4/Fsaf1/Cul4a/Ipo4/Sf3a2/Exosc2/Atm/Usp16/Pten/Prmt5/Rexo1/Mak16/Rpp40/Efl1/Riox1/Ddx31/Ddx56/Eif2s2/Dnttip2/Dimt1/Dhx29/Dkc1/Prpf3/Gtpbp4/Mettl16/No…		mmu05332	Graft-versus-host disease	2.5157	6.75367e-08	1.48159e-06	H2-K1/H2-M3/H2-DMa/Cd80/H2-T25/H2-Aa/H2-T23/H2-Ab1/H2-Q4/H2-DMb1/H2-D1/H2-Eb1/H2-Q9/H2-Q7/H2-T22/H2-Ob/H2-Oa/Klrd1
GO:0006164	purine nucleotide biosynthetic process	2.49242	1e-10	2.08926e-08	Afmid/Haao/Ak1/Trem2/Adcy8/Gmpr/Atp5me/Sdhb/Ndufa1/Ndufa5/Ndufa7/Ndufa2/Papss1/Atp5mf/Ptger3/Atp5f1e/Atp5pf/Ndufc2/Ndufb7/Ndufb11/Tmsb4x/Atp5mc2/Ndufa13/Dguok/Ndufa6/Ndufs2/Qprt/Ndufa3/Ndufb3/Ndufs6/Ndufa11/Ndufs4/Prpsap2/Oas1a/Ndufa9/Ndufv3/Ndufb8/Ndufb1/Lipa/Atp5f1c/Tgfb1/Ndufb5/Ndufb4/Ndufv2/Sdhd/Atp5pd/Adk/Atp5mc3/Ndufc1/Ndufb9/Atp5if1/Atp5mg/Atp5po/Dck/Atp5f1d/Atp5pb/Ndufb10/Nme7/Ndufb6/Ak4/…		mmu00970	Aminoacyl-tRNA biosynthesis	-2.42892	7.86174e-08	1.62322e-06	Sepsecs/Wars1/Vars1/Aars1/Mars2/Farsb/Farsa/Nars2/Aars2/Gars1/Eprs1/Nars1/Lars1/Cars1/Tars2/Ears2/Iars1/Mars1/Tars1/Yars1
GO:0009260	ribonucleotide biosynthetic process	2.46692	1e-10	2.08926e-08	Ak1/Trem2/Adcy8/Gmpr/Atp5me/Sdhb/Ndufa1/Ndufa5/Ndufa7/Ndufa2/Papss1/Atp5mf/Ptger3/Atp5f1e/Atp5pf/Ndufc2/Ndufb7/Ndufb11/Tmsb4x/Atp5mc2/Ndufa13/Ndufa6/Ndufs2/Upp2/Ndufa3/Ndufb3/Ndufs6/Ndufa11/Ndufs4/Ndufa9/Ndufv3/Ndufb8/Ndufb1/Lipa/Atp5f1c/Tgfb1/Ndufb5/Ndufb4/Ndufv2/Sdhd/Atp5pd/Adk/Atp5mc3/Ndufc1/Ndufb9/Atp5if1/Atp5mg/Atp5po/Dck/Atp5f1d/Atp5pb/Ndufb10/Nme7/Ndufb6/Ak4/Ndufa8/Ndufs5/Ndufs7/Hprt1/Aldo…		mmu04940	Type I diabetes mellitus	2.39666	2.10983e-07	4.11417e-06	H2-K1/H2-M3/H2-DMa/Cd80/H2-T25/H2-Aa/H2-T23/H2-Ab1/H2-Q4/H2-DMb1/H2-D1/H2-Eb1/H2-Q9/H2-Q7/H2-T22/Cpe/H2-Ob/H2-Oa
GO:0006364	rRNA processing	-2.4279	1e-10	2.08926e-08	Rrp1/Pdcd11/Ercc2/Mrm3/Esf1/Ebna1bp2/Ddx18/Utp14b/Mtrex/Nvl/Exosc10/Srfbp1/Tfb2m/Bysl/Riok2/Sart1/Nol11/Nop9/Zcchc4/Exosc2/Rexo1/Mak16/Rpp40/Ddx56/Dimt1/Dkc1/Gtpbp4/Mettl16/Utp15/Utp20/Ddx55/Ncl/Pwp1/Wdr12/Nol10/Riok3/Mrto4/Spout1/Tsr1/Rrp7a/Nop14/Nsun5/Mrm1/Rrp1b/Tent4b/Wdr46/Rrp8/Utp6/Nat10/Utp18/Bop1/Nol6/Rrp9/Nol9/Usp36/Ddx27/Ddx51/Kri1/Nob1/Tbl3/Wdr36/Utp14a/Ddx21/Las1l/Wdr3/Ddx10/Dis3/Heatr…		mmu05320	Autoimmune thyroid disease	2.39735	9.44247e-07	1.74437e-05	H2-K1/H2-M3/H2-DMa/Cd80/H2-T25/H2-Aa/H2-T23/H2-Ab1/H2-Q4/H2-DMb1/H2-D1/H2-Eb1/H2-Q9/H2-Q7/H2-T22/H2-Ob/H2-Oa
GO:0016072	rRNA metabolic process	-2.41446	1e-10	2.08926e-08	Rrp1/Pdcd11/Ercc2/Mrm3/Esf1/Ebna1bp2/Ddx18/Utp14b/Gtf3c1/Mtrex/Nvl/Exosc10/Srfbp1/Tfb2m/Ubtf/Bysl/Riok2/Sart1/Nol11/Nop9/Ercc6/Zcchc4/Myc/Exosc2/Rexo1/Mak16/Rpp40/Ddx56/Dimt1/Dkc1/Gtpbp4/Mettl16/Tcof1/Utp15/Utp20/Ddx55/Ncl/Pwp1/Polr1e/Wdr12/Nol10/Riok3/Mrto4/Spout1/Polr1a/Tsr1/Rrp7a/Nop14/Nsun5/Mrm1/Rrp1b/Tent4b/Wdr46/Rrp8/Utp6/Nat10/Utp18/Bop1/Nol6/Rrp9/Nol9/Usp36/Ddx27/Ddx51/Kri1/Nob1/Tbl3/Ippk…		mmu03030	DNA replication	2.29958	1.46917e-06	2.57839e-05	Prim2/Rfc3/Pcna/Rpa3/Lig1/Rfc5/Prim1/Rfc2/Rnaseh2b/Pold4/Rnaseh2c/Rfc4/Mcm7/Rpa2/Rnaseh2a/Pola1/Mcm5/Pole2/Pole3/Pole4
GO:0046390	ribose phosphate biosynthetic process	2.4074	1e-10	2.08926e-08	Ak1/Trem2/Adcy8/Gmpr/Atp5me/Sdhb/Ndufa1/Ndufa5/Ndufa7/Ndufa2/Papss1/Atp5mf/Ptger3/Atp5f1e/Atp5pf/Ndufc2/Ndufb7/Ndufb11/Tmsb4x/Atp5mc2/Ndufa13/Ndufa6/Ndufs2/Upp2/Ndufa3/Ndufb3/Ndufs6/Ndufa11/Ndufs4/Prpsap2/Ndufa9/Ndufv3/Ndufb8/Ndufb1/Lipa/Atp5f1c/Tgfb1/Ndufb5/Ndufb4/Ndufv2/Sdhd/Atp5pd/Adk/Atp5mc3/Ndufc1/Ndufb9/Atp5if1/Atp5mg/Atp5po/Dck/Atp5f1d/Atp5pb/Ndufb10/Nme7/Ndufb6/Ak4/Ndufa8/Ndufs5/Ndufs7/Hp…		mmu05330	Allograft rejection	2.32648	5.61627e-06	9.38719e-05	H2-K1/H2-M3/H2-DMa/Cd80/H2-T25/H2-Aa/H2-T23/H2-Ab1/H2-Q4/H2-DMb1/H2-D1/H2-Eb1/H2-Q9/H2-Q7/H2-T22/H2-Ob/H2-Oa
GO:0009165	nucleotide biosynthetic process	2.33009	1e-10	2.08926e-08	Afmid/Haao/Ak1/Trem2/Adcy8/Gmpr/Atp5me/Sdhb/Ndufa1/Ndufa5/Ndufa7/Ndufa2/Papss1/Atp5mf/Dhfr/Ptger3/Atp5f1e/Atp5pf/Tyms/Ndufc2/Ndufb7/Ndufb11/Tmsb4x/Atp5mc2/Ndufa13/Rrm2/Dguok/Ndufa6/Ndufs2/Dut/Upp2/Qprt/Ndufa3/Ndufb3/Ndufs6/Ndufa11/Ndufs4/Prpsap2/Oas1a/Ndufa9/Ndufv3/Ndufb8/Ndufb1/Lipa/Atp5f1c/Tgfb1/Ndufb5/Ndufb4/Ndufv2/Sdhd/Atp5pd/Adk/Atp5mc3/Ndufc1/Ndufb9/Atp5if1/Atp5mg/Atp5po/Dck/Atp5f1d/Atp5pb/…		mmu04514	Cell adhesion molecule (CAM) interaction	1.96823	9.41987e-06	0.00015029	Cadm1/Pdcd1/Jam2/H2-K1/Icos/H2-M3/H2-DMa/Cd80/H2-T25/H2-Aa/H2-T23/H2-Ab1/Icam2/Selplg/H2-Q4/H2-DMb1/H2-D1/H2-Eb1/Itgb8/H2-Q9/H2-Q7/H2-T22/F11r/H2-Ob/Nectin1/Alcam/Cd99l2/H2-Oa/Cntn2/Negr1/Ptprf/Madcam1/Cd40/Ptprd/Nrcam/Cldn5/Cldn7/Nfasc/Cdh4/H2-Q6
GO:0006399	tRNA metabolic process	-2.24214	1e-10	2.08926e-08	Trub2/Sepsecs/Qtrt2/Trmt44/Trnt1/Wars1/Nemf/Exosc2/Rpp40/Vars1/Mettl1/Aars1/Trmt13/Mars2/Farsb/Tarbp1/B3gntl1/Trmt1/Farsa/Tsen54/Nars2/Rtcb/Aars2/Lrrc47/Ptcd1/Akt1/Pusl1/Kti12/Gars1/Ctu1/Nsun2/Thumpd1/Trmt2a/Eprs1/Nars1/Trmu/Lars1/Elac1/Nat10/Cars1/Alkbh1/Zcchc7/Ankrd16/Tars2/Ears2/Trub1/Pus7/Trmt10c/Dus3l/Polr3d/Iars1/Wdr4/Mars1/Tars1/Trmt61a/Yars1		mmu05204	Chemical carcinogenesis - DNA adducts	2.28965	1.47872e-05	0.000220741	Gstm5/Mgst3/Gstm4/Cbr1/Gstp1/Gstk1/Nat1/Gsto2/Gstt1/Gstm7/Gstm1/Gstt3/Cyp2e1/Hpgds/Gstm6/Ephx1
GO:0009060	aerobic respiration	2.16493	1e-10	2.08926e-08	Cdk1/Idh3g/Atp5me/Sdhb/Ndufa1/Uqcr11/Ndufa5/Ndufa7/Cox6b1/Ndufa2/Atp5mf/Cox6c/Atp5f1e/Aldoc/Igf1/Atp5pf/Ndufc2/Eno3/Uqcr10/Ndufb7/Ndufb11/Cox6a1/Ndufa13/Cox4i1/Cox8a/Mpc2/Dguok/Ndufa6/Cbfa2t3/Ndufs2/Cox7a2/Ndufa3/Ndufb3/Ndufs6/Ndufa11/Ndufs4/Cox5b/Khk/Ndufa9/Ndufv3/Ndufb8/Ndufb1/Uqcrq/Uqcrb/Lipa/Cox7b/Chchd2/Cox4i2/Atp5f1c/Cat/Uqcrh/Ndufb5/Ndufb4/Ndufv2/Sdhd/Tefm/Atp5pd/Ndufc1/Ndufb9/Atp5if1/Uqcc…		mmu00562	Inositol phosphate metabolism	-2.0511	1.50934e-05	0.000220741	Pi4k2b/Ip6k1/Mtm1/Pik3ca/Mtmr2/Mtmr3/Synj1/Pip4k2a/Itpkc/Plcb3/Mtmr1/Plcb1/Mtmr4/Inpp5e/Plcg1/Pip5k1c/Pi4kb/Synj2/Itpk1/Plcd3/Pi4ka/Sacm1l/Mtmr6/Inpp5d/Pik3c3/Fig4/Itpkb/Pik3cg/Pik3cd/Pip4k2c/Pik3c2a/Inpp5b/Pik3cb/Plcg2/Pten/Inpp5f/Pip4k2b/Ipmk/Pi4k2a/Ippk
GO:0045333	cellular respiration	2.12082	1e-10	2.08926e-08	Cdk1/Idh3g/Atp5me/Sdhb/Ndufa1/Mtln/Uqcr11/Ndufa5/Ndufa7/Cox6b1/Ndufa2/Atp5mf/Cox6c/Sdhaf4/Atp5f1e/Aldoc/Igf1/Atp5pf/Ndufc2/Eno3/Uqcr10/Ndufb7/Ndufb11/Cox6a1/Ndufa13/Cox4i1/Cox8a/Mpc2/Dguok/Ndufa6/Cbfa2t3/Ndufs2/Cox7a2/Ndufa3/Ndufb3/Ndufs6/Ndufa11/Ndufs4/Cox5b/Khk/Oas1a/Ndufa9/Ndufv3/Ndufb8/Ndufb1/Uqcrq/Uqcrb/Lipa/Cox7b/Chchd2/Cox4i2/Atp5f1c/Cat/Uqcrh/Ndufb5/Ndufb4/Ndufv2/Sdhd/Tefm/Atp5pd/Ndufc1/N…		mmu04612	Antigen processing and presentation	2.10476	1.57276e-05	0.000220816	H2-K1/H2-M3/H2-DMa/H2-T25/B2m/H2-Aa/H2-T23/H2-Ab1/Psme2/Psme1/H2-Q4/H2-DMb1/H2-D1/H2-Eb1/H2-Q9/H2-Q7/H2-T22/Cd74/H2-Ob/Tapbp/H2-Oa/Rfxank/Klrd1/Ctsb/Psme2b
GO:0006397	mRNA processing	-2.10134	1e-10	2.08926e-08	Dhx40/Scaf1/Rprd1a/Cstf3/Rbm17/Rprd1b/Ern1/Thrap3/Yju2/Rbm4/Srsf6/Cstf1/Adar/Sf3b1/Arglu1/Cpsf4l/Gm25549/Srsf10/Cenatac/Virma/Fbxo24/Dhx8/Hspa8/Plcb1/Alkbh5/Cwf19l2/Prpf6/Cstf2t/Papolg/Gcfc2/Rbm5/Prpf40b/Ddx43/Xab2/Hnrnpa2b1/Aqr/Nrde2/Sart3/Papola/Srsf1/Cpsf7/Trmt6/Mfap1a/Thoc5/Sympk/Hnrnpk/Nup98/Srsf4/Wbp11/Sfpq/Sltm/Cpsf1/Pabpn1/Tsen2/Tent4a/Sf1/Hnrnpr/Apobec1/Slu7/Dazap1/Rbm15b/Pnpt1/Cwc25/Rbm…		mmu05171	Coronavirus disease	1.75887	2.17677e-05	0.000293865	Mapk3/Cxcl10/Rps29/Isg15/Ifnar2/Rpl41/Rpl34-ps1/Mx1/Rps12/Rpl37a/Rpl38/Rpl35/Rplp1/Stat1/Rplp2/Rps17/Rpl36/Oas1a/Rps27/Mapk12/Rps26/Masp1/Rpl39/Ifnb1/Rps27rt/Rps21/Rpl32/Rpl31/Rps19/Rps14/Rpl37rt/Rpl37/Rpl35a/Rpl36a/Rpl26/Rps13/Rps15a/Rpl27a/Gm15682/Rpl28/Fau/Rpl18a/C1qc/Rps23/Rps3/Rps11/Rps15/Rpl7/Sting1/Rpl13-ps6/Rps25/Rps18/Rps20/Rpl15/Rps16/Rpl10/Rps27l/Rpl19/Rps5/Rpl11/Rps28/Oas1g/Rpl13/Rps4…
GO:0010608	post-transcriptional regulation of gene expression	-2.00284	1e-10	2.08926e-08	Scrib/Jak2/Tent4a/Apobec1/Ogfod1/Gigyf2/Atg14/Akt2/Pnpt1/Parn/Casc3/Ep300/Rbm10/Etf1/Upf1/Dis3l2/Ncbp3/Pum1/Zc3h18/Dnajc3/Fus/Fxr2/Secisbp2/Ptcd3/Usp4/Sars1/Ago2/Ace/Khsrp/Tbk1/Zc3h12a/Wtip/Ripk1/Tnfrsf1b/Zmpste24/Tirap/Caprin1/Dgcr8/Mlh1/Tdrd7/Trub2/Mir23a/Wdr24/Per1/Sepsecs/Usp5/Ythdc1/Zcchc4/Cnot3/Prkaa1/Niban1/Mir17hg/Cul4a/Fbxw8/Unk/Pde12/Usp16/Csde1/Guf1/Eif4g1/Ogt/Matr3/Zc3h10/Fam76b/Dhx29…		mmu00980	Metabolism of xenobiotics by cytochrome P450	2.23848	2.48354e-05	0.00032286	Gstm5/Mgst3/Gstm4/Cbr1/Gstp1/Gstk1/Gsto2/Akr7a5/Gstt1/Gstm7/Gstm1/Gstt3/Cyp2e1/Hpgds/Gstm6/Ephx1
GO:0072522	purine-containing compound biosynthetic process	2.1589	1.26783e-10	2.55423e-08	Afmid/Haao/Ak1/Trem2/Adcy8/Gmpr/Atp5me/Sdhb/Ndufa1/Ndufa5/Ndufa7/Ndufa2/Papss1/Atp5mf/Ptger3/Atp5f1e/Atp5pf/Ndufc2/Ndufb7/Ndufb11/Tmsb4x/Atp5mc2/Ndufa13/Mpc2/Dguok/Ndufa6/Ndufs2/Qprt/Ndufa3/Ndufb3/Ndufs6/Ndufa11/Ndufs4/Prpsap2/Oas1a/Ndufa9/Ndufv3/Ndufb8/Ndufb1/Lipa/Ppcs/Atp5f1c/Tgfb1/Ndufb5/Ndufb4/Ndufv2/Sdhd/Atp5pd/Adk/Atp5mc3/Ndufc1/Ndufb9/Atp5if1/Atp5mg/Atp5po/Dck/Atp5f1d/Atp5pb/Ndufb10/Nme7/N…		mmu04931	Insulin resistance	-1.87711	3.14739e-05	0.000394547	Slc2a1/Srebf1/Rps6kb2/Acacb/Ppp1cc/Ppp1ccb/Rela/Akt2/Slc27a3/Mlxip/Prkag2/Prkcb/Gfpt1/Ppargc1b/Pik3cd/Nos3/Creb3l4/Oga/Crtc2/Ikbkb/Prkaa1/Pik3cb/Pten/Ppara/Ogt/Cpt1a/Rps6kb1/Mlxipl/Pik3r1/Akt1/Ppp1r3b/Irs2/Socs3/Ppp1r3d/Ptpn1/Stat3
GO:0140236	translation at presynapse	2.63199	1.83665e-10	3.57261e-08	Rps12/Rpl37a/Rpl38/Rpl35/Rplp2/Rpl36/Rps27/Rps26/Rpl35rt/Rpl32/Rps14/Rpl37rt/Rpl37/Rpl35a/Rpl36a/Rpl26/Rps15a/Rpl27a/Rpl28/Rps11/Rpl7/Rpl15/Rps16/Rpl10/Rps5/Rps28/Rpl13/Rpl29/Rps24/Rpl23/Rpl9/Rps27a/Rpl22/Rpl12/Rpl34/Rpl23a/Rpl17/Rpl27/Rpl5		mmu00982	Drug metabolism - cytochrome P450	2.22774	4.31077e-05	0.000509295	Gstm5/Mgst3/Gstm4/Gstp1/Gstk1/Gsto2/Gstt1/Gstm7/Gstm1/Gstt3/Cyp2e1/Hpgds/Gstm6/Maoa/Fmo1
GO:0015980	energy derivation by oxidation of organic compounds	1.93181	2.44804e-10	4.60313e-08	Eva1a/Nr1d1/Cdk1/Gnas/Idh3g/Atp5me/Sdhb/Ndufa1/Mtln/Uqcr11/Ndufa5/Ndufa7/Cox6b1/Ndufa2/Atp5mf/Cox6c/Sdhaf4/Atp5f1e/Aldoc/Igf1/Atp5pf/Ndufc2/Eno3/Uqcr10/Ndufb7/Ndufb11/Trp53/Cox6a1/Ndufa13/Cox4i1/Cox8a/Mpc2/Dguok/Ndufa6/Cbfa2t3/Ndufs2/Cox7a2/Ndufa3/Ndufb3/Ndufs6/Ndufa11/Ndufs4/Cox5b/Khk/Oas1a/Ndufa9/Ndufv3/Ndufb8/Ndufb1/Uqcrq/Uqcrb/Lipa/Cox7b/Chchd2/Cox4i2/Gabarapl1/Atp5f1c/Cat/Uqcrh/Ndufb5/Blvra/…		mmu04110	Cell cycle	1.81719	4.35295e-05	0.000509295	Cdk1/Anapc13/Cdkn2c/Ccne2/Pcna/Mad2l1/Ywhah/Ccne1/Pkmyt1/Aurkb/Esco2/Cdc45/Ndc80/Ccna2/Trp53/Anapc11/Chek2/Sgo1/Cdc6/Bub1/E2f1/Cdc25b/Cdkn1c/Tgfb1/Cdca5/Rbx1/Rbl1/Rad21/Anapc10/Cdk4/Ticrr/Mcm7/Cdc20/Orc6/Ywhaq/Mad2l1bp/Plk1/Cdkn2b/Orc1/Anapc7/Mcm5/Bub1b/Pttg1/Gadd45b/Cdt1/Skp1/Dbf4/Ccnb1/Hdac1/E2f2/Cdc26/Cdkn2a/Trip13/Mad2l2/Ccnb2/Mcm3
GO:1901293	nucleoside phosphate biosynthetic process	2.05054	3.54308e-10	6.44727e-08	Afmid/Tk1/Haao/Ak1/Trem2/Nagk/Adcy8/Gmpr/Atp5me/Sdhb/Ndufa1/Ndufa5/Ndufa7/Ndufa2/Papss1/Atp5mf/Dhfr/Ptger3/Atp5f1e/Atp5pf/Tyms/Ndufc2/Ndufb7/Ndufb11/Tmsb4x/Atp5mc2/Ndufa13/Rrm2/Mpc2/Dguok/Ndufa6/Ndufs2/Dut/Upp2/Qprt/Ndufa3/Ndufb3/Ndufs6/Ndufa11/Ndufs4/Prpsap2/Oas1a/Ndufa9/Ndufv3/Ndufb8/Ndufb1/Lipa/Ppcs/Atp5f1c/Tgfb1/Ndufb5/Ndufb4/Ndufv2/Sdhd/Atp5pd/Adk/Atp5mc3/Ndufc1/Ndufb9/Atp5if1/Atp5mg/Atp5po/…		mmu05416	Viral myocarditis	2.02906	5.51325e-05	0.000624242	H2-K1/H2-M3/H2-DMa/Cd80/Cav1/H2-T25/H2-Aa/Sgce/H2-T23/H2-Ab1/Casp8/H2-Q4/H2-DMb1/H2-D1/H2-Eb1/H2-Q9/H2-Q7/H2-T22/Actg1/H2-Ob/Casp3/H2-Oa/Sntb1/Cd40
GO:0140241	translation at synapse	2.64202	4.50233e-10	7.69626e-08	Rps12/Rpl37a/Rpl38/Rpl35/Rplp2/Rpl36/Rps27/Rps26/Rpl35rt/Rpl32/Rps14/Rpl37rt/Rpl37/Rpl35a/Rpl36a/Rpl26/Rps15a/Rpl27a/Rpl28/Rps11/Rpl7/Rpl15/Rps16/Rpl10/Rps5/Rps28/Rpl13/Rpl29/Rps24/Rpl23/Rpl9/Rps27a/Rpl22/Rpl12/Rpl34/Rpl23a/Rpl17/Rpl27/Rpl5		mmu04070	Phosphatidylinositol signaling system	-1.84625	0.000106238	0.0011653	Pi4k2b/Ip6k1/Mtm1/Pik3ca/Mtmr2/Mtmr3/Synj1/Dgkd/Pip4k2a/Pik3r2/Itpkc/Plcb3/Mtmr1/Plcb1/Mtmr4/Inpp5e/Plcg1/Pip5k1c/Pi4kb/Itpr1/Synj2/Itpk1/Plcd3/Pi4ka/Sacm1l/Mtmr6/Inpp5d/Prkcb/Pik3c3/Itpkb/Pik3cd/Dgkq/Pip4k2c/Pik3c2a/Inpp5b/Pik3cb/Plcg2/Pten/Inpp5f/Prkcg/Pip4k2b/Ipmk/Pik3r1/Pi4k2a/Ippk/Dgka/Dgkz
GO:0140242	translation at postsynapse	2.64202	4.50233e-10	7.69626e-08	Rps12/Rpl37a/Rpl38/Rpl35/Rplp2/Rpl36/Rps27/Rps26/Rpl35rt/Rpl32/Rps14/Rpl37rt/Rpl37/Rpl35a/Rpl36a/Rpl26/Rps15a/Rpl27a/Rpl28/Rps11/Rpl7/Rpl15/Rps16/Rpl10/Rps5/Rps28/Rpl13/Rpl29/Rps24/Rpl23/Rpl9/Rps27a/Rpl22/Rpl12/Rpl34/Rpl23a/Rpl17/Rpl27/Rpl5		mmu00790	Folate biosynthesis	2.08563	0.00013656	0.0014525	Pcbd1/Ggh/Akr1b10/Dhfr/Cbr1/Akr1b1/Pcbd2/Qdpr/Gphn/Mocs2
GO:0042274	ribosomal small subunit biogenesis	-2.40401	7.63457e-10	1.26667e-07	Srfbp1/Mettl17/Bysl/Riok2/Nol11/Nop9/Fsaf1/Rpp40/Dnttip2/Dimt1/Utp15/Utp20/Nol10/Riok3/Rcc1l/Tsr1/Rrp7a/Nop14/Wdr46/Utp6/Nat10/Utp18/Nom1/Nol6/Rrp9/Kri1/Nob1/Tbl3/Wdr36/Wdr3/Heatr1/Nop58/Nop56/Pwp2/Surf6/Wdr43/Riok1/Aatf/Rrs1/Utp4/Ltv1/Mphosph10/Wdr75		mmu03050	Proteasome	2.01092	0.000163605	0.00168898	Psmb9/Psmb8/Pomp/Psmb6/Psme2/Psme1/Psmc3/Psma1/Sem1/Psma2/Psmb4/Psmb1/Psma5/Psmb5/Psmb10/Psma7/Psmc2/Psmb2/Psma3/Psme2b/Psmb3/Psmb7/Psmd8/Psmc6/Psma4/Psmd11/Psma6/Psmd14
GO:0008380	RNA splicing	-1.80353	5.86248e-09	9.44864e-07	Dhx40/Scaf1/Atxn7/Rbm17/Ern1/Thrap3/Yju2/Rbm4/Srsf6/Sf3b1/Arglu1/Gm25549/Srsf10/Cenatac/Virma/Fbxo24/Dhx8/Hspa8/Trrap/Cwf19l2/Prpf6/Gcfc2/Rbm5/Prpf40b/Ddx43/Xab2/Hnrnpa2b1/Aqr/Nrde2/Sart3/Srsf1/Mfap1a/Thoc5/Hnrnpk/Nup98/Srsf4/Wbp11/Sfpq/Tsen2/Sgf29/Sf1/Hnrnpr/Slu7/Dazap1/Akt2/Hspa1a/Rbm15b/Cwc25/Rbm15/Casc3/Pdcd7/Gm23303/Arb2a/Ppwd1/Rbm10/Thoc1/Upf1/Ddx39a/Rbmx/Pus1/Fus/Grsf1/Polr2a/Srrm1/Prpf18/…		mmu04012	ErbB signaling pathway	-1.84039	0.000289457	0.00290284	Eif4ebp1/Nrg4/Pak6/Sos1/Pik3r2/Crkl/Nck2/Erbb3/Plcg1/Rps6kb2/Tgfa/Akt2/Jun/Prkcb/Pik3cd/Braf/Araf/Shc1/Nrg2/Pik3cb/Plcg2/Myc/Egfr/Pak2/Map2k4/Stat5b/Prkcg/Rps6kb1/Map2k7/Camk2d/Raf1/Pik3r1/Akt1/Ptk2/Sos2/Crk
GO:0006091	generation of precursor metabolites and energy	1.82126	9.85342e-09	1.54398e-06	Oxct1/Eva1a/Nr1d1/Cdk1/Gnas/Idh3g/Atp5me/Sdhb/Ndufa1/Mtln/Uqcr11/Ndufa5/Ndufa7/Cox6b1/Ndufa2/Atp5mf/Cox6c/Sdhaf4/Atp5f1e/Aldoc/Igf1/Atp5pf/Ndufc2/Eno3/Uqcr10/Ndufb7/Ndufb11/Trp53/Cox6a1/Ndufa13/Cox4i1/Cox8a/Mpc2/Dguok/Ndufa6/Cbfa2t3/Ndufs2/Cox7a2/Ndufa3/Ndufb3/Ndufs6/Ndufa11/Ndufs4/Cox5b/Khk/Oas1a/Ndufa9/Ndufv3/Ndufb8/Ndufb1/Uqcrq/Uqcrb/Lipa/Cox7b/Chchd2/Cox4i2/Gabarapl1/Atp5f1c/Cat/Uqcrh/Ndufb5/…		mmu05135	Yersinia infection	-1.71015	0.000380054	0.00370552	Plcg1/Actr2/Nfatc1/Pip5k1c/Skap2/Actr3/Tab1/Wasl/Fyb1/Pkn2/Ikbkg/Rela/Arf6/Akt2/Jun/Map3k7/Arhgef12/Itga5/Nfatc2/Fcgr3/Pik3cd/Tbk1/Map2k3/Pkn1/Elmo2/Traf6/Ikbkb/Vav1/Pxn/Pik3cb/Limk1/Map2k4/Irak4/Wipf1/Map2k7/Arhgef1/Lat/Ptk2b/Pik3r1/Akt1/Ptk2/Irak1/Lcp2/Chuk/Crk/Nlrp3/Myd88
GO:0006418	tRNA aminoacylation for protein translation	-2.5557	1.13128e-08	1.72474e-06	Rars1/Aarsd1/Sars1/Wars1/Vars1/Aars1/Mars2/Farsb/Farsa/Nars2/Aars2/Lrrc47/Gars1/Eprs1/Nars1/Lars1/Cars1/Tars2/Ears2/Iars1/Mars1/Tars1/Yars1		mmu05322	Systemic lupus erythematosus	1.84546	0.000553779	0.00511517	H2az2/H2-DMa/Cd80/H2az1/H2-Aa/H2-Ab1/H2bc4/Actn1/H2ac23/H2-DMb1/H2-Eb1/H4c9/H2bc11/H2ac7/H2-Ob/C1qc/H2ac13/H2-Oa/Macroh2a2/Snrpd1/Snrpb/Snrpd3/H2ac24/Cd40/H4c14/C1qb/H2bc3/C1qa/H3f3a/H4c18/Fcgr1/H2bc27/H3c4/H2ac11/H2ac25/H2ax
GO:0009117	nucleotide metabolic process	1.75877	2.34723e-08	3.4844e-06	Afmid/Haao/Enpp5/Ak1/Trem2/Adcy8/Gmpr/Parp14/Ldhb/Atp5me/Naxe/Sdhb/Ndufa1/Ndufa5/Ndufa7/Ndufa2/Papss1/Atp5mf/Pde8b/Naxd/Dhfr/Ptger3/Atp5f1e/Aldoc/Igf1/Atp5pf/Tyms/Ndufc2/Eno3/Ndufb7/Ndufb11/Tmsb4x/Atp5mc2/Trp53/Slc25a11/Ndufa13/Cnp/Nt5m/Rrm2/Dguok/Ndufa6/Cbfa2t3/Ndufs2/Dut/Upp2/Qprt/Ndufa3/Ndufb3/Ndufs6/Ndufa11/Fis1/Dnph1/Ndufs4/Prpsap2/Khk/Oas1a/Ndufa9/Ndufv3/Ndufb8/Ndufb1/Nt5c3b/Slc29a1/Lipa/At…		mmu03015	mRNA surveillance pathway	-1.72761	0.000546323	0.00511517	Cstf3/Cstf1/Smg7/Cstf2t/Papolg/Ppp2r2d/Papola/Cpsf7/Ppp1cc/Ppp1ccb/Sympk/Ppp2cb/Cpsf1/Pabpn1/Dazap1/Nxf1/Ppp2r5a/Casc3/Ddx19b/Etf1/Ppp2r5d/Upf1/Fus/Srrm1/Fip1l1/Cpsf6/Cstf2/Ppp2r5b/Smg5/Ppp2r2a/Cpsf2/Ppp2r5c/Gle1/Ncbp1/Pnn
GO:0009451	RNA modification	-2.15753	2.77051e-08	4.00729e-06	Trmt10a/Adar/Gtpbp3/Dus1l/Trmo/Cdkal1/Hnrnpab/Nsun3/Trmt1l/Mto1/Trmt6/Mettl2/Apobec1/Gar1/Rbm15b/Rbm15/Mrm3/Mettl6/Pus1/Sars1/Mettl4/Tfb2m/Trub2/Sepsecs/Qtrt2/Zcchc4/Trmt44/Adarb1/Dimt1/Mettl1/Dkc1/Mettl16/Aars1/Trmt13/Tarbp1/B3gntl1/Trmt1/Spout1/Akt1/Rbm47/Pusl1/Kti12/Ctu1/Nsun2/Syncrip/Nsun5/Mrm1/Thumpd1/Trmu/Nat10/Apobec3/Alkbh1/Jmjd6/Ankrd16/Trub1/Pus7/Trmt10c/Dus3l/Ftsj3/Nop2/Wdr4/Pus7l/Trmt…		mmu00983	Drug metabolism - other enzymes	1.85604	0.000615844	0.0055426	Tk1/Gstm5/Mgst3/Gstm4/Gstp1/Rrm2/Nat1/Dut/Upp2/Gsto2/Gstt1/Gstm7/Nme7/Gstm1/Hprt1/Gstt3/Cyp2e1/Gstm6
GO:0006401	RNA catabolic process	-1.85311	2.9878e-08	4.21355e-06	Tent5a/Hnrnpd/Nsun4/Zhx2/Oas2/Nbas/Supv3l1/Thrap3/Ints4/Cpeb3/Smg7/Pop1/Edc3/Alkbh5/Ints7/Slfn8/Cnot7/Ddx49/Hnrnpab/Dcp1a/Nrde2/Dna2/Dcp1b/Zfp36/Srsf1/Zswim8/Fto/Zc3h12d/Skic3/Hspa1b/Smg9/Ints10/Jak2/Tent4a/Apobec1/Pkp3/Gigyf2/Hspa1a/Pnpt1/Parn/Casc3/Rbm10/Etf1/Skic2/Upf1/Dis3l2/Pum1/Zc3h18/Fus/Grsf1/Fxr2/Secisbp2/Ints11/Mtrex/Exosc10/Ago2/Khsrp/Dhx34/Zc3h12a/Tnfrsf1b/Rnaseh1/Tirap/Caprin1/Mlh1/I…		mmu00480	Glutathione metabolism	1.87302	0.00081065	0.00711345	Gstm5/Mgst3/Gstm4/Gstp1/Gpx4/Gstk1/Rrm2/Gsto2/Gstt1/Txndc12/Gstm7/Lancl1/Gpx7/Gstm1/Lap3/Nat8f1/Gstt3/Hpgds/Chac2/Gstm6/Prdx6/Gpx1/Idh2/Gclm
GO:0007254	JNK cascade	-2.11881	3.55278e-08	4.8881e-06	Rapgef1/Mapkbp1/Phlpp1/Pja2/Aida/Tlr4/Rb1cc1/Cyld/Zmynd11/Becn1/Hipk2/Ern1/Ccn2/Spag9/Plcb1/Ephb1/Map3k11/Rap2a/Dnaja1/Naip2/Map3k20/Itch/Nod1/Map3k13/Dusp3/Stk3/Nod2/Jun/Ccr7/Flt4/Map3k7/Zfp110/Mapk8ip3/Atf2/Tnfrsf11a/Mink1/Hacd3/Fgf12/Trib1/Ltbr/Cdc42se1/Cbs/Taok2/Ripk2/Taok3/Ripk1/Map3k6/Tirap/Axin1/Fgd4/Traf6/Per1/Ercc6/Naip5/Map2k4/Irak4/Mfhas1/Fcgr2b/Naip6/Hipk3/Dvl3/Map2k7/Cracr2a/Daxx/Tlr…		mmu03430	Mismatch repair	2.00468	0.000876536	0.00721988	Rfc3/Pcna/Rpa3/Lig1/Rfc5/Rfc2/Pold4/Exo1/Rfc4/Rpa2
GO:0098754	detoxification	2.24524	3.97961e-08	5.34499e-06	Prdx4/Prxl2a/Gstm5/Sod1/Oscp1/Prdx2/Mgst3/Dhfr/Akr1a1/Prdx1/Txn1/Gpx4/Gstk1/Gsto2/Prxl2b/Pnkd/Cat/Gstt1/Gstm7/Lancl1/Park7/Aldh2/Gpx7/Esd/Mt3/Mtarc2/Txndc17/Selenot/Selenow/Txnrd2/Aldh1a1/Ccs/Ralbp1/Prdx6/Gpx1/Prdx5/Rab29/Cd36/Sesn1/Hagh/Ltc4s/Haghl/Gstz1/Abcb1a/Adh5/Prdx3/Aifm2/Slc11a1/Rab40b/Nqo1		mmu04672	Intestinal immune network for IgA production	1.93597	0.000925626	0.00721988	Tnfrsf17/Il15/Icos/H2-DMa/Cd80/H2-Aa/H2-Ab1/Tnfsf13b/H2-DMb1/H2-Eb1/Tgfb1/H2-Ob/H2-Oa/Madcam1/Cd40
GO:0043039	tRNA aminoacylation	-2.48596	4.83108e-08	6.3377e-06	Wars1/Vars1/Aars1/Mars2/Farsb/Farsa/Nars2/Aars2/Lrrc47/Gars1/Eprs1/Nars1/Lars1/Cars1/Tars2/Ears2/Iars1/Mars1/Tars1/Yars1		mmu00565	Ether lipid metabolism	1.89689	0.000899348	0.00721988	Plpp1/Pafah1b3/Pld4/Pla2g2d/Lpcat2/Plpp2/Plpp3/Tmem86a/Plaat3
GO:1903311	regulation of mRNA metabolic process	-1.85529	7.34213e-08	9.41294e-06	Nbas/Thrap3/Rbm4/Cpeb3/Srsf6/Arglu1/Srsf10/Hspa8/Alkbh5/Cnot7/Hnrnpab/Rbm5/Dcp1a/Ddx43/Hnrnpa2b1/Nrde2/Dcp1b/Zfp36/Srsf1/Fto/Zc3h12d/Hnrnpk/Nup98/Srsf4/Sltm/Jak2/Pabpn1/Tent4a/Apobec1/Pkp3/Gigyf2/Dazap1/Rbm15b/Pnpt1/Parn/Rbm15/Casc3/Arb2a/Rbm10/Upf1/Dis3l2/Rbmx/Pum1/Fus/Fxr2/Secisbp2/Srrm1/Fip1l1/Ahcyl1/Rbm25/Exosc10/Ago2/Khsrp/Dhx34/Zc3h12a/Ptbp1/Tirap/Caprin1/Obi1/Mlh1/Cdc73/Ythdc1/Cnot3/Cul4a/…		mmu05323	Rheumatoid arthritis	1.84038	0.00090305	0.00721988	Il15/Ltb/H2-DMa/Cd80/Flt1/Atp6v1c1/H2-Aa/H2-Ab1/Atp6v0e2/Tnfsf13b/Atp6v1f/H2-DMb1/H2-Eb1/Tgfb1/Atp6v0e/Atp6v1d/H2-Ob/Atp6v0b/H2-Oa/Atp6v0d1/Tek
GO:1990748	cellular detoxification	2.24578	8.05881e-08	1.01022e-05	Prdx4/Prxl2a/Gstm5/Sod1/Prdx2/Mgst3/Dhfr/Akr1a1/Prdx1/Txn1/Gpx4/Gstk1/Gsto2/Prxl2b/Pnkd/Cat/Gstt1/Gstm7/Lancl1/Park7/Aldh2/Gpx7/Esd/Mt3/Mtarc2/Txndc17/Selenot/Selenow/Txnrd2/Aldh1a1/Ccs/Prdx6/Gpx1/Prdx5/Rab29/Cd36/Sesn1/Hagh/Ltc4s/Haghl/Gstz1/Adh5/Prdx3/Aifm2/Slc11a1/Rab40b/Nqo1		mmu05161	Hepatitis B	-1.59209	0.000906666	0.00721988	Tab1/Ddb2/Apaf1/Ikbkg/Rela/Jak2/Akt2/Jun/Map3k7/Ep300/Nfatc2/Prkcb/Atf4/Atf2/Stat2/Atf6b/Pik3cd/Creb3l4/Braf/Tbk1/Araf/Tirap/Map2k3/Ticam2/Traf6/Ikbkb/Pik3cb/Myc/Ddb1/Map2k4/Mavs/Irak4/Casp9/Stat5b/Prkcg/Map2k7/Slc10a1/Raf1/Ptk2b/Pik3r1/Akt1/Stat6/Smad4/Irak1/Sos2/Bcl2/Chuk/Jak1/Stat3/Myd88
GO:0006417	regulation of translation	-1.80347	8.52555e-08	1.04549e-05	Pum1/Dnajc3/Fxr2/Secisbp2/Ptcd3/Usp4/Sars1/Ago2/Tbk1/Wtip/Caprin1/Trub2/Wdr24/Sepsecs/Usp5/Zcchc4/Cnot3/Prkaa1/Niban1/Fbxw8/Unk/Usp16/Csde1/Guf1/Eif4g1/Ogt/Dhx29/Aars1/Abcf1/Ythdf3/Tcof1/B3gntl1/Rps6kb1/Eif5/Fmr1/Larp4b/Otud6b/Pum3/Celf1/Eif2ak3/Bzw1/Ythdf1/Ncl/Gemin5/Ywhag/Sesn2/Larp1/Hnrnpu/Cnot10/Abce1/Ptk2b/Smyd5/Piwil2/Lsm14a/Mapkapk5/Akt1/Patl1/Eif4g2/Larp4/Syncrip/Nsun5/Ncbp1/Eprs1/Eif3b/K…		mmu05310	Asthma	1.95259	0.00115061	0.00877966	H2-DMa/H2-Aa/H2-Ab1/H2-DMb1/H2-Eb1/H2-Ob/Fcer1g/H2-Oa/Cd40
GO:0043038	amino acid activation	-2.45864	1.02132e-07	1.22581e-05	Sars2/Dars1/Qrsl1/Iars2/Rars2/Aasdh/Rars1/Aarsd1/Sars1/Wars1/Vars1/Aars1/Mars2/Farsb/Farsa/Nars2/Aars2/Lrrc47/Gars1/Eprs1/Nars1/Lars1/Cars1/Tars2/Ears2/Iars1/Mars1/Tars1/Yars1		mmu00280	Valine, leucine and isoleucine degradation	1.84202	0.00136671	0.0102067	Oxct1/Acads/Pccb/Bckdha/Mcee/Hsd17b10/Aldh2/Acat1/Hadhb/Aldh7a1/Acaa1a/Bcat2/Mccc2/Ivd/Hadh/Acsf3/Hmgcl/Acadsb/Abat/Acat2/Lao1/Hibadh/Acad8
GO:1902600	proton transmembrane transport	2.13751	1.07459e-07	1.26287e-05	Slc36a2/Atp5me/Slc46a1/Tmem175/Ndufa2/Atp5mf/Atp6v1c1/Atp5f1e/Atp5pf/Ndufb7/Atp5mc2/Ndufs2/Cox7a2/Atp6v0e2/Ndufs4/Atp6v1f/Atp1a2/Cox4i2/Atp5f1c/Uqcrh/Ndufv2/Slc25a4/Atp5pd/Surf1/Atp5mc3/Coa8/Atp5mg/Atp5po/Atp6v0e/Atp6v1d/Atp5f1d/Atp5pb/Atp6v0b/Ndufs7/Atp5mc1/Ndufs8/Sting1/Uqcrfs1/Atp6v0d1/Ghitm/Cox5a/Ndufs3/Atp6v1g1/Slc9a2/Fxyd2/mt-Co3/Atp6v0c/Hvcn1/Ndufa10/Slc25a5/Lamp1/Slc25a18		mmu04936	Alcoholic liver disease	-1.61209	0.001423	0.0104057	Acox1/Tab3/Srebf1/Il12a/Acacb/Tab1/Ikbkg/Rela/Akt2/Map3k7/Acox3/Prkag2/Tbk1/Ripk1/Tirap/Map2k3/Sirt1/Traf6/Ikbkb/Prkaa1/C4b/Camkk2/Ppara/C3ar1/Tcf7l2/Map2k4/Aldh3a2/Irak4/Cpt1a/Acadvl/Map2k7/Map3k5/Akt1/Irak1/Il17ra/Chuk/C5ar1/Myd88
GO:0046034	ATP metabolic process	1.97774	1.15437e-07	1.32893e-05	Ak1/Trem2/Atp5me/Sdhb/Ndufa1/Ndufa5/Ndufa7/Ndufa2/Atp5mf/Atp5f1e/Aldoc/Igf1/Atp5pf/Ndufc2/Eno3/Ndufb7/Ndufb11/Tmsb4x/Atp5mc2/Ndufa13/Ndufa6/Cbfa2t3/Ndufs2/Ndufa3/Ndufb3/Ndufs6/Ndufa11/Fis1/Ndufs4/Khk/Ndufa9/Ndufv3/Ndufb8/Ndufb1/Lipa/Atp1a2/Atp5f1c/Tgfb1/Ndufb5/Ndufb4/Ndufv2/Sdhd/Atp5pd/Atp5mc3/Ndufc1/Ndufb9/Atp5if1/Atp5mg/Src/Atp5po/Atp5f1d/Arl2/Atp5pb/Ndufb10/Ndufb6/Ak4/Mtch2/Ndufa8/Ndufs5/Mpi/N…		mmu04392	Hippo signaling pathway - multiple species	-1.89085	0.00157904	0.0109287	Lats1/Mob1a/Lats2/Stk3/Sav1/Tead3/Nf2/Wtip/Frmd6/Rassf2/Rassf1
GO:0097237	cellular response to toxic substance	2.20756	1.23854e-07	1.39732e-05	Prdx4/Prxl2a/Gstm5/Sod1/Mapk3/Prdx2/Mgst3/Dhfr/Akr1a1/Prdx1/Txn1/Gpx4/Gstk1/Gsto2/Prxl2b/Pnkd/Cat/Gstt1/Gstm7/Lancl1/Park7/Aldh2/Gpx7/Ednra/Esd/Mt3/Mtarc2/Txndc17/Selenot/Selenow/Txnrd2/Aldh1a1/Ppp1r9a/Ccs/Prdx6/Gpx1/Prdx5/Rab29/Cd36/Sesn1/Hagh/Ltc4s/Haghl/Gstz1/Abcb1a/Adh5/Prdx3/Aifm2/Slc11a1/Cdh13/Rab40b/Nqo1		mmu04664	Fc epsilon RI signaling pathway	-1.81029	0.00158793	0.0109287	Akt2/Gab2/Lyn/Inpp5d/Pik3cd/Map2k3/Vav1/Pik3cb/Plcg2/Map2k4/Pla2g4a/Map2k7/Lat/Raf1/Pik3r1/Akt1/Sos2/Lcp2/Alox5
GO:0009636	response to toxic substance	2.00424	1.60912e-07	1.77982e-05	Prdx4/Cdk1/Prxl2a/Gstm5/Sod1/Mapk3/Oscp1/Prdx2/Gria1/Mgst3/Pon3/Dhfr/Rad51/Akr1a1/Prdx1/Txn1/Scn1b/Gstp1/Cnp/Gpx4/Gstk1/Gsto2/Alas1/Prxl2b/Pnkd/Cat/Gstt1/Gstm7/Lancl1/Park7/Aldh2/Cst3/Gpx7/Ednra/Esd/Alad/Slc22a8/Mt3/Mtarc2/Txndc17/Gabrb1/Selenot/Selenow/Txnrd2/Ddc/Aldh1a1/Ppp1r9a/Ccs/Scn11a/Ralbp1/Prdx6/Gpx1/Prdx5/Rab29/Mbp/Ephx1/Ccnb1/Cd36/Blmh/Sesn1/Hagh/Ltc4s/Fmc1/Ass1/Haghl/Gstz1/Nefl/Penk/Ab…		mmu01521	EGFR tyrosine kinase inhibitor resistance	-1.709	0.00155199	0.0109287	Eif4e2/Fgf2/Bcl2l11/Eif4ebp1/Sos1/Pik3r2/Gas6/Erbb3/Plcg1/Rps6kb2/Tgfa/Jak2/Akt2/Kdr/Prkcb/Bcl2l1/Hgf/Pik3cd/Braf/Araf/Shc1/Nrg2/Pik3cb/Plcg2/Egfr/Pten/Prkcg/Rps6kb1/Raf1/Pik3r1/Akt1/Sos2/Bcl2/Jak1/Stat3
GO:0006360	transcription by RNA polymerase I	-2.31938	2.14774e-07	2.32988e-05	Smarca5/Atf4/Ubtf/Zmpste24/Spty2d1/Nol11/Phf8/Ercc6/Gtf2h1/Tcof1/Utp15/Eif2ak3/Ncl/Dhx33/Pwp1/Polr1e/Polr1a/Mybbp1a/Myo1c/Taf1c/Ippk/Ddx21/Taf1a/Heatr1/Wdr43/Rrn3/Mars1/Wdr75		mmu03013	Nucleocytoplasmic transport	-1.6127	0.00187383	0.0124097	Ahctf1/Ranbp2/Pom121/Nup214/Nup188/Nup88/Ipo9/Thoc5/Nup133/Nup98/Nxf1/Casc3/Ddx19b/Xpo4/Nup58/Thoc1/Upf1/Nmd3/Srrm1/Kpna4/Ipo7/Cse1l/Xpo7/Rangap1/Kpna2/Nup54/Ipo4/Tnpo3/Nup160/Xpo5/Xpo6/Xpot/Xpo1/Tnpo2/Gle1/Kpna1/Seh1l/Nup153/Ncbp1/Pnn
GO:0045943	positive regulation of transcription by RNA polymerase I	-2.44203	2.24431e-07	2.38871e-05	Smarca5/Atf4/Ubtf/Nol11/Phf8/Ercc6/Utp15/Eif2ak3/Ncl/Dhx33/Pwp1/Mybbp1a/Myo1c/Ippk/Ddx21/Heatr1/Wdr43/Mars1/Wdr75		mmu04814	Motor proteins	1.58615	0.00185514	0.0124097	Myo15a/Klc4/Tpm2/Tubb2b/Myl6/Dync2li1/Capzb/Tubb5/Dynlrb1/Myh11/Kif21a/Dynlt1c/Myo18b/Tubb2a/Dnal4/Dynlt1f/Dynlt1a/Myl9/Kif22/Myo1d/Acta2/Kif21b/Tubb4a/Tnni2/Actg1/Mylpf/Dynlt3/Dynll2/Kif15/Kif18b/Dynll1/Dctn6/Kif1c/Kif20a/Tubg1/Dctn3/Kif1a/Kif23/Tuba1b/Kif5c/Dnai2/Dctn5/Actr10/Tubb4b/Myl2/Myl12a/Kif19a/Dynlt1b/Actb
GO:0141188	nucleic acid catabolic process	-1.76985	2.83837e-07	2.96505e-05	Tent5a/Hnrnpd/Nsun4/Zhx2/Oas2/Nbas/Supv3l1/Thrap3/Ints4/Cpeb3/Smg7/Pop1/Dffb/Edc3/Alkbh5/Ints7/Slfn8/Dnase1/Cnot7/Ddx49/Hnrnpab/Dcp1a/Nrde2/Dna2/Dcp1b/Zfp36/Srsf1/Zswim8/Fto/Zc3h12d/Skic3/Hspa1b/Apaf1/Smg9/Ints10/Jak2/Tent4a/Apobec1/Pkp3/Gigyf2/Hspa1a/Fbh1/Pnpt1/Parn/Casc3/Hsf1/Rbm10/Etf1/Skic2/Upf1/Dis3l2/Pum1/Zc3h18/Fus/Grsf1/Fxr2/Secisbp2/Ints11/Mtrex/Exosc10/Ago2/Khsrp/Dhx34/Zc3h12a/Tnfrsf1b/…		mmu04330	Notch signaling pathway	-1.70509	0.00210305	0.0136698	Tle1/Ctbp1/Rfng/Tle3/Tle6/Notch1/Psen1/Dvl3/Snw1/Notch4/Maml3/Tle4/Kat2a/Lfng/Dvl1/Dtx2/Rbpj
GO:0009141	nucleoside triphosphate metabolic process	1.83974	3.13577e-07	3.21616e-05	Ak1/Trem2/Atp5me/Sdhb/Ndufa1/Ndufa5/Ndufa7/Ndufa2/Atp5mf/Atp5f1e/Aldoc/Igf1/Atp5pf/Tyms/Ndufc2/Eno3/Ndufb7/Ndufb11/Tmsb4x/Atp5mc2/Ndufa13/Dguok/Ndufa6/Cbfa2t3/Ndufs2/Dut/Ndufa3/Ndufb3/Ndufs6/Ndufa11/Fis1/Ndufs4/Khk/Ndufa9/Ndufv3/Ndufb8/Ndufb1/Lipa/Atp1a2/Atp5f1c/Tgfb1/Ndufb5/Ndufb4/Ndufv2/Sdhd/Atp5pd/Adk/Atp5mc3/Ndufc1/Ndufb9/Atp5if1/Atp5mg/Src/Atp5po/Atp5f1d/Arl2/Atp5pb/Ndufb10/Nme7/Ndufb6/Ak4/M…		mmu03420	Nucleotide excision repair	1.73739	0.00272289	0.017377	Rfc3/Pcna/Rpa3/Gtf2h2/Gtf2h3/Lig1/Rfc5/Polr2k/Rfc2/Polr2j/Rbx1/Pold4/Rfc4/Ercc1/Polr2i/Rpa2/Mnat1/Cetn2/Polr2g/Polr2f/Pole2/Pole3/Pole4/Polr2d/Polr2e/Rad23a/Polr2h/Gtf2h5/Xpa
GO:0043484	regulation of RNA splicing	-2.00007	4.23603e-07	4.26704e-05	Clk1/Sfswap/Atxn7/Ern1/Thrap3/Rbm4/Srsf6/Arglu1/Srsf10/Hspa8/Trrap/Rbm5/Ddx43/Hnrnpa2b1/Srsf1/Hnrnpk/Nup98/Srsf4/Sgf29/Dazap1/Akt2/Hspa1a/Rbm15b/Rbm15/Arb2a/Rbm10/Upf1/Rbmx/Fus/Grsf1/Polr2a/Srrm1/Usp22/Supt20/Rbm25/Rbm12b1/Exosc10/Mettl4/Ptbp1/Obi1/Ythdc1/Prmt5/Taf5l/Zc3h10/Mettl16/Zfp638/Rbm39/Fmr1/Hnrnph2/Clk2/Celf1/Sf3b3/Snw1/Ncl/Wdr77/Srsf5/Hnrnpu/Cdk11b/Hnrnpf/Pik3r1/Rbm47/Snrnp70/Ncbp1/Rrp1…		mmu04114	Oocyte meiosis	1.57976	0.00361399	0.022652	Cdk1/Anapc13/Mapk3/Ccne2/Adcy8/Mad2l1/Ywhah/Ccne1/Pkmyt1/Igf1/Calm2/Anapc11/Sgo1/Bub1/Mapk12/Rbx1/Calm3/Aurka/Anapc10/Ppp1ca/Cdc20/Ywhaq/Plk1/Calm1/Anapc7/Prkaca/Pttg1/Rps6ka3/Skp1/Ccnb1/Cdc26/Itpr2/Mad2l2/Ccnb2/Ywhab/Ywhae
GO:0030490	maturation of SSU-rRNA	-2.33083	4.79969e-07	4.75001e-05	Srfbp1/Bysl/Riok2/Nol11/Nop9/Rpp40/Nol10/Riok3/Tsr1/Nop14/Wdr46/Utp6/Nat10/Kri1/Nob1/Tbl3/Wdr3/Heatr1/Pwp2/Wdr43/Riok1/Rrs1/Utp4		mmu05235	PD-L1 expression and PD-1 checkpoint pathway in cancer	-1.57945	0.00469171	0.028891	Csnk2a2/Plcg1/Rps6kb2/Nfatc1/Hif1a/Eml4/Ikbkg/Rela/Jak2/Akt2/Jun/Nfatc2/Map3k3/Pik3cd/Tirap/Ifngr1/Map2k3/Ticam2/Traf6/Ikbkb/Pik3cb/Batf/Egfr/Pten/Rps6kb1/Ppp3cc/Lat/Raf1/Pik3r1/Akt1/Chuk/Jak1/Stat3/Myd88
GO:0009144	purine nucleoside triphosphate metabolic process	1.86626	5.04043e-07	4.90225e-05	Ak1/Trem2/Atp5me/Sdhb/Ndufa1/Ndufa5/Ndufa7/Ndufa2/Atp5mf/Atp5f1e/Aldoc/Igf1/Atp5pf/Ndufc2/Eno3/Ndufb7/Ndufb11/Tmsb4x/Atp5mc2/Ndufa13/Dguok/Ndufa6/Cbfa2t3/Ndufs2/Ndufa3/Ndufb3/Ndufs6/Ndufa11/Fis1/Ndufs4/Khk/Ndufa9/Ndufv3/Ndufb8/Ndufb1/Lipa/Atp1a2/Atp5f1c/Tgfb1/Ndufb5/Ndufb4/Ndufv2/Sdhd/Atp5pd/Adk/Atp5mc3/Ndufc1/Ndufb9/Atp5if1/Atp5mg/Src/Atp5po/Atp5f1d/Arl2/Atp5pb/Ndufb10/Nme7/Ndufb6/Ak4/Mtch2/Nduf…		mmu03440	Homologous recombination	1.65148	0.00526481	0.0318612	Rad51b/Rpa3/Brca1/Rad51/Rad51c/Sem1/Rad54l/Pold4/Brca2/Rpa2/Bard1/Brip1/Rad54b/Babam1
GO:0046330	positive regulation of JNK cascade	-2.19818	6.09381e-07	5.8263e-05	Nod1/Stk3/Nod2/Ccr7/Flt4/Map3k7/Mapk8ip3/Tnfrsf11a/Mink1/Ltbr/Taok2/Ripk2/Taok3/Ripk1/Tirap/Axin1/Fgd4/Traf6/Naip5/Map2k4/Mfhas1/Fcgr2b/Naip6/Dvl3/Map2k7/Cracr2a/Map3k5/Card9/Ptk2b/Gadd45g/Unc5cl/App/Rassf2/Trpv4/Irak1/Crk/Dab2/Ptpn1/Myd88		mmu05223	Non-small cell lung cancer	-1.65661	0.00580403	0.034529	Plcg1/Tgfa/Rb1/Jak3/Ddb2/Eml4/Akt2/Kif5b/Prkcb/Hgf/Pik3cd/Braf/Araf/Pik3cb/Plcg2/Egfr/Cdk6/Casp9/Stat5b/Prkcg/Raf1/Gadd45g/Pik3r1/Akt1/Rassf5/Stk4/Sos2/Rxra/Rassf1/Stat3
GO:0010506	regulation of autophagy	-1.74709	6.43428e-07	6.0493e-05	Hmox1/Mlst8/Fyco1/Rnf41/Hif1a/Pik3r4/Keap1/Nupr1/Dele1/Dnm1l/Ikbkg/Nod1/Poldip2/Bmf/Atg14/Usp20/Plk3/Ercc4/Nod2/Map3k7/Nprl3/Ep300/Kdr/C9orf72/Itga5/Huwe1/Hdac6/Pik3c3/Tnfaip3/Rab3gap2/Supt5/Usp30/Cdk16/Tbk1/Pip4k2c/Ufl1/Ripk2/Zc3h12a/Trim65/Usp33/Fbxl4/Atp13a2/Zmpste24/Mtcl2/Tsc1/Sirt1/Pik3c2a/Dram2/Wdr24/Stk38l/Ikbkb/Prkaa1/Rmc1/Ulk2/Atg2a/Trim23/Wac/Camkk2/Tbc1d25/Atm/Uvrag/Eif4g1/Trim21/Atg7/…		mmu04910	Insulin signaling pathway	-1.49201	0.0059663	0.0349029	Elk1/Ppp1r3f/Pygb/Ppp1r3c/Kras/Flot2/Phka1/Pik3ca/Tsc2/Cblb/Prkag1/Eif4e2/Rapgef1/Eif4ebp1/Sos1/Pik3r2/Crkl/Prkacb/Fasn/Srebf1/Rps6kb2/Acacb/Pde3b/Ppp1cc/Ppp1ccb/Akt2/Fbp1/Prkag2/Sorbs1/Pik3cd/Braf/Araf/Prkci/Tsc1/Shc1/Ikbkb/Prkaa1/Prkar2a/Pik3cb/Rps6kb1/Raf1/Pik3r1/Akt1/Ppp1r3b/Irs2/Sos2/Mknk1/Crk/Socs3/Ppp1r3d/Ptpn1/Flot1
GO:0042273	ribosomal large subunit biogenesis	-2.24336	1.06278e-06	9.82811e-05	Urb1/Tma16/Nop16/Ebna1bp2/Ddx18/Afg2a/Nvl/Mdn1/Mak16/Gtpbp4/Ddx55/Wdr12/Airim/Mrto4/Rcc1l/Dhx30/Bop1/Nol9/Las1l/Nle1/Heatr3/Surf6/Ftsj3/Nop2/Rrs1/Noc2l/Ppan/Sdad1		mmu04975	Fat digestion and absorption	1.75786	0.00612421	0.0352393	Plpp1/Pla2g2d/Plpp2/Plpp3/Acat1/Pla2g12a/Dgat1/Cd36
GO:0046328	regulation of JNK cascade	-2.00634	1.12033e-06	0.000101932	Rapgef1/Mapkbp1/Phlpp1/Pja2/Aida/Tlr4/Rb1cc1/Cyld/Zmynd11/Hipk2/Ern1/Ccn2/Plcb1/Ephb1/Map3k11/Rap2a/Dnaja1/Naip2/Itch/Nod1/Dusp3/Stk3/Nod2/Ccr7/Flt4/Map3k7/Zfp110/Mapk8ip3/Tnfrsf11a/Mink1/Trib1/Ltbr/Cdc42se1/Cbs/Taok2/Ripk2/Taok3/Ripk1/Tirap/Axin1/Fgd4/Traf6/Per1/Naip5/Map2k4/Mfhas1/Fcgr2b/Naip6/Hipk3/Dvl3/Map2k7/Cracr2a/Map3k5/Card9/Ptk2b/Gadd45g/Akt1/Unc5cl/App/Rassf2/Trpv4/Irak1/Crk/Dab2/Ptpn1…		mmu05220	Chronic myeloid leukemia	-1.57107	0.00651853	0.0369033	Ddb2/Ikbkg/Rela/Akt2/Gab2/Bcl2l1/Pik3cd/Braf/Araf/Ctbp1/Shc1/Ikbkb/Pik3cb/Myc/Cdk6/Stat5b/Mdm2/Raf1/Gadd45g/Pik3r1/Akt1/Smad4/Sos2/Chuk/Crk/Runx1
GO:0009205	purine ribonucleoside triphosphate metabolic process	1.85811	1.19398e-06	0.000106909	Ak1/Trem2/Atp5me/Sdhb/Ndufa1/Ndufa5/Ndufa7/Ndufa2/Atp5mf/Atp5f1e/Aldoc/Igf1/Atp5pf/Ndufc2/Eno3/Ndufb7/Ndufb11/Tmsb4x/Atp5mc2/Ndufa13/Ndufa6/Cbfa2t3/Ndufs2/Ndufa3/Ndufb3/Ndufs6/Ndufa11/Fis1/Ndufs4/Khk/Ndufa9/Ndufv3/Ndufb8/Ndufb1/Lipa/Atp1a2/Atp5f1c/Tgfb1/Ndufb5/Ndufb4/Ndufv2/Sdhd/Atp5pd/Atp5mc3/Ndufc1/Ndufb9/Atp5if1/Atp5mg/Src/Atp5po/Atp5f1d/Arl2/Atp5pb/Ndufb10/Nme7/Ndufb6/Ak4/Mtch2/Ndufa8/Ndufs5/…		mmu04370	VEGF signaling pathway	-1.62558	0.00706008	0.0387201	Akt2/Kdr/Nfatc2/Prkcb/Pik3cd/Nos3/Pxn/Pik3cb/Plcg2/Casp9/Pla2g4a/Mapkapk2/Prkcg/Ppp3cc/Raf1/Pik3r1/Akt1/Ptk2
GO:0006163	purine nucleotide metabolic process	1.69155	1.30309e-06	0.000114855	Afmid/Haao/Ak1/Trem2/Adcy8/Gmpr/Parp14/Ldhb/Atp5me/Sdhb/Ndufa1/Ndufa5/Ndufa7/Ndufa2/Papss1/Atp5mf/Pde8b/Ptger3/Atp5f1e/Aldoc/Igf1/Atp5pf/Ndufc2/Eno3/Ndufb7/Ndufb11/Tmsb4x/Atp5mc2/Trp53/Slc25a11/Ndufa13/Dguok/Ndufa6/Cbfa2t3/Ndufs2/Qprt/Ndufa3/Ndufb3/Ndufs6/Ndufa11/Fis1/Dnph1/Ndufs4/Prpsap2/Khk/Oas1a/Ndufa9/Ndufv3/Ndufb8/Ndufb1/Slc29a1/Lipa/Atp1a2/Atp5f1c/Tgfb1/Nudt9/Ndufb5/Ndufb4/Ndufv2/Sdhd/Atp5p…		mmu04152	AMPK signaling pathway	-1.48214	0.00696051	0.0387201	Lepr/Ppp2r3a/Pparg/Elavl1/Pik3ca/Ccnd1/Tsc2/Prkag1/Eif4ebp1/Adra1a/Creb5/Pik3r2/Hmgcr/Fasn/Srebf1/Ppp2r2d/Rps6kb2/Acacb/Tbc1d1/Ppp2cb/Cab39l/Pfkfb4/Akt2/Ppp2r5a/Map3k7/Fbp1/Ppp2r5d/Prkag2/Pfkfb3/Pik3cd/Creb3l4/Crtc2/Tsc1/Sirt1/Prkaa1/Pik3cb/Camkk2/Rab10/Ppp2r5b/Ppp2r2a/Cpt1a/Rps6kb1/Ppp2r5c/Pik3r1/Cab39/Akt1/Irs2
GO:1903313	positive regulation of mRNA metabolic process	-2.00155	1.33839e-06	0.000116151	Dcp1b/Zfp36/Fto/Zc3h12d/Nup98/Jak2/Tent4a/Apobec1/Gigyf2/Dazap1/Pnpt1/Parn/Upf1/Dis3l2/Rbmx/Pum1/Fxr2/Exosc10/Ago2/Khsrp/Zc3h12a/Caprin1/Obi1/Mlh1/Cdc73/Cnot3/Cul4a/Pde12/Csde1/Adarb1/Prmt5/Mettl16/Ythdf3/Tut7/Fmr1/Celf1/Snw1/Ythdf1/Ncl/Wdr77/Hnrnpu/Piwil2/Patl1/Snrnp70/Syncrip/Ncbp1/Tent4b/Eif4enif1/Zfp36l2/Pan2/Mex3d/Dhx36/Qki/Stat3		mmu05213	Endometrial cancer	-1.5938	0.00720791	0.0389227	Pik3cd/Braf/Araf/Axin1/Mlh1/Pik3cb/Myc/Egfr/Pten/Tcf7l2/Casp9/Raf1/Gadd45g/Pik3r1/Akt1/Sos2
GO:0045727	positive regulation of translation	-1.96887	1.94711e-06	0.000164918	Dnajc3/Fxr2/Secisbp2/Usp4/Ago2/Tbk1/Trub2/Wdr24/Usp5/Zcchc4/Prkaa1/Niban1/Fbxw8/Usp16/Csde1/Guf1/Eif4g1/Ogt/Dhx29/Abcf1/Ythdf3/Rps6kb1/Fmr1/Larp4b/Otud6b/Ythdf1/Ywhag/Larp1/Hnrnpu/Ptk2b/Smyd5/Piwil2/Akt1/Eif4g2/Larp4/Syncrip/Nsun5/Jmjd4/Eif2b5/Nat10/Dhx36/Habp4/Rxra/Trmt10c/Bcl3/Serp1		mmu00590	Arachidonic acid metabolism	1.67138	0.00779478	0.0414541	Pla2g2d/Hpgd/Tbxas1/Plaat3/Cbr1/Gpx4/Ptgr1/Prxl2b/Cyp2j12/Cyp2j6/Cyp2e1/Hpgds/Pla2g12a
GO:0009259	ribonucleotide metabolic process	1.74131	1.95879e-06	0.000164918	Ak1/Trem2/Adcy8/Gmpr/Atp5me/Sdhb/Ndufa1/Ndufa5/Ndufa7/Ndufa2/Papss1/Atp5mf/Pde8b/Ptger3/Atp5f1e/Aldoc/Igf1/Atp5pf/Ndufc2/Eno3/Ndufb7/Ndufb11/Tmsb4x/Atp5mc2/Ndufa13/Ndufa6/Cbfa2t3/Ndufs2/Upp2/Ndufa3/Ndufb3/Ndufs6/Ndufa11/Fis1/Ndufs4/Khk/Ndufa9/Ndufv3/Ndufb8/Ndufb1/Slc29a1/Lipa/Atp1a2/Atp5f1c/Tgfb1/Nudt9/Ndufb5/Ndufb4/Ndufv2/Sdhd/Atp5pd/Adk/Atp5mc3/Ndufc1/Ndufb9/Rnaseh2b/Atp5if1/Atp5mg/Src/Atp5po/D…		mmu04640	Hematopoietic cell lineage	1.61585	0.00804905	0.0415473	Il7r/Siglech/Gp9/Cd9/H2-DMa/Cd5/Cd59a/H2-Aa/H2-Ab1/H2-DMb1/H2-Eb1/Il11ra1/Epor/H2-Ob/H2-Oa/Il2ra/Gypa
GO:0009150	purine ribonucleotide metabolic process	1.772	2.17376e-06	0.000180326	Ak1/Trem2/Adcy8/Gmpr/Atp5me/Sdhb/Ndufa1/Ndufa5/Ndufa7/Ndufa2/Papss1/Atp5mf/Pde8b/Ptger3/Atp5f1e/Aldoc/Igf1/Atp5pf/Ndufc2/Eno3/Ndufb7/Ndufb11/Tmsb4x/Atp5mc2/Ndufa13/Ndufa6/Cbfa2t3/Ndufs2/Ndufa3/Ndufb3/Ndufs6/Ndufa11/Fis1/Ndufs4/Khk/Ndufa9/Ndufv3/Ndufb8/Ndufb1/Slc29a1/Lipa/Atp1a2/Atp5f1c/Tgfb1/Nudt9/Ndufb5/Ndufb4/Ndufv2/Sdhd/Atp5pd/Adk/Atp5mc3/Ndufc1/Ndufb9/Atp5if1/Atp5mg/Src/Atp5po/Atp5f1d/Arl2/At…		mmu04145	Phagocytosis	1.42135	0.00800588	0.0415473	H2-K1/Clec7a/H2-M3/H2-DMa/Tubb2b/Atp6v1c1/H2-T25/H2-Aa/H2-T23/Dync2li1/H2-Ab1/Sec61g/Tubb5/Gabarapl2/Dynlrb1/Map1lc3a/Atp6v0e2/Atp6v1f/Cyba/Dynlt1c/H2-Q4/H2-DMb1/Gabarap/Lyz2/H2-D1/Tubb2a/H2-Eb1/Dynlt1f/Dynlt1a/Gabarapl1/Tubb4a/H2-Q9/H2-Q7/H2-T22/Atp6v0e/Atp6v1d/Dnm3/Actg1/Lyz1/H2-Ob/Dynlt3/Sec61b/Atp6v0b/Rilp/Vamp3/H2-Oa/Dynll2/Ctsb/Atp6v0d1/Ctsd/Dynll1/Dctn6/Alb/Mrc2/Dctn3/Atp6v1g1/Tuba1b/Dctn5…
GO:0019693	ribose phosphate metabolic process	1.73191	2.22245e-06	0.000181693	Ak1/Trem2/Adcy8/Gmpr/Atp5me/Sdhb/Ndufa1/Ndufa5/Ndufa7/Ndufa2/Papss1/Nudt14/Atp5mf/Pde8b/Ptger3/Atp5f1e/Aldoc/Igf1/Atp5pf/Ndufc2/Eno3/Ndufb7/Ndufb11/Tmsb4x/Atp5mc2/Ndufa13/Ndufa6/Cbfa2t3/Ndufs2/Upp2/Ndufa3/Ndufb3/Ndufs6/Ndufa11/Fis1/Ndufs4/Prpsap2/Khk/Ndufa9/Ndufv3/Ndufb8/Ndufb1/Slc29a1/Lipa/Atp1a2/Atp5f1c/Tgfb1/Nudt9/Ndufb5/Ndufb4/Ndufv2/Sdhd/Atp5pd/Adk/Atp5mc3/Ndufc1/Ndufb9/Rnaseh2b/Atp5if1/Atp5…		mmu04010	MAPK signaling pathway	-1.3702	0.00923409	0.0469734	Map3k4/Hspa8/Map3k11/Erbb3/Tgfbr2/Tgfa/Nfatc1/Il1r1/Flna/Rasgrf1/Tab1/Hspa1b/Map3k20/Ikbkg/Rela/Map3k13/Dusp3/Stk3/Akt2/Hspa1a/Jun/Flt4/Map3k7/Kdr/Map4k3/Mapk8ip3/Prkcb/Hgf/Atf4/Atf2/Map3k3/Braf/Taok2/Araf/Taok3/Map3k6/Map2k3/Ppp5c/Dusp8/Arrb2/Traf6/Ikbkb/Myc/Egfr/Pak2/Map2k4/Ppm1b/Irak4/Pla2g4a/Mapkapk2/Epha2/Prkcg/Ppp3cc/Dusp1/Rasgrp4/Map2k7/Daxx/Il1rap/Map3k5/Raf1/Gadd45g/Mapkapk5/Akt1/Stk4/Ir…
GO:0031123	RNA 3'-end processing	-2.14401	2.36204e-06	0.000190346	Angel2/Elac2/Rprd1a/Cstf3/Rprd1b/Supv3l1/Cstf1/Cpsf4l/Ints7/Cstf2t/Papolg/Papola/Cpsf7/Ints6l/Cpsf1/Pabpn1/Tent4a/Pnpt1/Parn/Leo1/Toe1/Ints11/Fip1l1/Ahcyl1/Ankzf1/Exosc10/Cdc73/Ints14/Ythdc1/Trnt1/Nemf/Cpsf6/Exosc2/Cstf2/Ints6/Rexo1/Dkc1/Ints8/Cpsf2/Tut7/Ints5/Paf1/Zcchc8/Zc3h3/Tut1/Ptcd1/Ncbp1/Tent4b/Elac1/Dhx36/Trmt10c
GO:0006413	translational initiation	-1.92447	2.74845e-06	0.000218366	Depdc5/Eif3d/Ppp1r15a/Fbxo4/Eif4g3/Eif2s1/Fxr1/Mtif2/Eif2b3/Eif2s3x/Tsc2/Eif4e2/Eif4a2/Eif4ebp1/Atxn3/Rragc/Mif4gd/Hspa5/Uhmk1/Rbm4/Eif4h/Eif3j2/Nck2/Eif2ak1/Rps6kb2/Paip2b/Eif2ak4/Rara/Eif3c/Dele1/Map3k20/Scrib/Gigyf2/Akt2/Eif3j1/Eif4a1/Dnajc3/Usp4/Ago2/Eif3a/Tbk1/Caprin1/Wdr24/Prkaa1/Eif4g1/Ogt/Eif2s2/Dhx29/Abcf1/Ythdf3/Rps6kb1/Eif5/Fmr1/Eif2ak3/Bzw1/Ythdf1/Dhx33/Ywhag/Larp1/Abce1/Akt1/Eif4g2/N…
GO:0006356	regulation of transcription by RNA polymerase I	-2.27487	3.32751e-06	0.000260701	Smarca5/Atf4/Ubtf/Zmpste24/Nol11/Phf8/Ercc6/Utp15/Eif2ak3/Ncl/Dhx33/Pwp1/Mybbp1a/Myo1c/Ippk/Ddx21/Heatr1/Wdr43/Mars1/Wdr75
GO:2000232	regulation of rRNA processing	-2.35181	3.5911e-06	0.000273749	Riok2/Dimt1/Utp15/Ncl/Usp36/Heatr1/Wdr43/Riok1/Wdr75
GO:0009895	negative regulation of catabolic process	-1.6538	3.5624e-06	0.000273749	Bag6/Syk/Mtmr9/Zkscan3/Csnk2a2/Rubcn/Usp8/Irak3/Hnrnpab/Foxk2/Flna/Acacb/Pde3b/Nrde2/Hmox1/Mlst8/Rnf41/Zfp36/Srsf1/Azin1/Nupr1/Rela/Jak2/Poldip2/Tent4a/Bmf/Mdm4/Apobec1/Pkp3/Parn/Trim39/Fbp1/Ep300/Itga5/Rbm10/Anks1/Fus/Hdac6/Secisbp2/Zdhhc7/Ago2/Tnfaip3/Pik3cg/Usp19/Usp30/Dhx34/Crtc3/Fbxl4/Slc25a12/Tirap/Tsc1/Ccar2/Stk38l/Usp5/Ric1/Ikbkb/Fbxo38/Prkaa1/Wac/Fbxw8/Egfr/Csde1/Usp38/Ppara/Ddit4/Eif4g1…
GO:0043487	regulation of RNA stability	-1.89378	4.50432e-06	0.000338785	Alkbh5/Cnot7/Ddx49/Dcp1a/Nrde2/Dcp1b/Zfp36/Srsf1/Fto/Zc3h12d/Jak2/Tent4a/Apobec1/Gigyf2/Pnpt1/Parn/Rbm10/Upf1/Dis3l2/Pum1/Zc3h18/Fus/Fxr2/Secisbp2/Ago2/Khsrp/Zc3h12a/Tnfrsf1b/Tirap/Caprin1/Mlh1/Cnot3/Cul4a/Pde12/Csde1/Fam76b/Mettl1/Mapkapk2/Fastkd5/Dkc1/Mettl16/Ythdf3/Tut7/Fmr1/Larp4b/Celf1/Ythdf1/Larp1/Brf1/Hnrnpu/Piwil2/Akt1/Patl1/Tbrg4/Rbm47/Nsun2/Syncrip/Tent4b/Eif4enif1/Zfp36l2/Pan2/Mex3d/Dh…
GO:0006402	mRNA catabolic process	-1.79267	4.92514e-06	0.000365562	Zfp36/Srsf1/Fto/Zc3h12d/Skic3/Hspa1b/Smg9/Jak2/Tent4a/Apobec1/Pkp3/Gigyf2/Hspa1a/Pnpt1/Parn/Casc3/Rbm10/Etf1/Skic2/Upf1/Dis3l2/Pum1/Fus/Fxr2/Secisbp2/Exosc10/Ago2/Khsrp/Dhx34/Zc3h12a/Tirap/Caprin1/Mlh1/Cnot3/Snd1/Cul4a/Pde12/Exosc2/Atm/Csde1/Edc4/Fam76b/Tesk1/Mapkapk2/Smg5/Fastkd5/Mettl16/Ythdf3/Tut7/Fmr1/Smg8/Larp4b/Celf1/Ythdf1/Larp1/Brf1/Hnrnpu/Xrn2/Mrto4/Cnot10/Piwil2/Patl1/Tbrg4/Rbm47/Syncri…
GO:0001701	in utero embryonic development	-1.5489	5.91384e-06	0.000433246	Kmt2d/Klf1/Tbl1xr1/Tgfbr2/Plcg1/Npat/Cert1/Lman1/Ell/Sec24d/Xab2/G2e3/Ctcf/Suv39h1/Xrcc2/Zfp420/Srsf1/Hif1a/Tab1/Keap1/Ppp1cc/Thoc5/Setdb1/Lats1/Exoc3l2/Plcd3/Nmt1/Atp11a/Smg9/Kdm4c/Zfand5/Dusp3/Slc35e2/Lats2/Stk3/Smarca4/Epn1/Bap1/Rbbp8/Ncoa6/Ncoa3/Pkd1/Nbn/Kdm2a/Ercc2/Hsf1/Skil/Slc39a3/Adam10/Mapk8ip3/Ctr9/Pbrm1/Bcl2l1/Ttll4/Dbn1/Kdm8/Atf2/Uty/C2cd3/Nos3/Fkrp/Zfp335/Kdm6a/Txnrd3/Ncoa1/Axin1/Bys…
GO:0006446	regulation of translational initiation	-2.026	7.31192e-06	0.000528802	Eif4ebp1/Atxn3/Rragc/Mif4gd/Uhmk1/Rbm4/Nck2/Eif2ak1/Rps6kb2/Paip2b/Eif2ak4/Rara/Scrib/Gigyf2/Akt2/Dnajc3/Usp4/Ago2/Tbk1/Caprin1/Wdr24/Prkaa1/Eif4g1/Ogt/Dhx29/Ythdf3/Rps6kb1/Eif5/Fmr1/Eif2ak3/Bzw1/Ythdf1/Ywhag/Larp1/Akt1/Eif4g2/Ncbp1/Eif3b/Eif2b5/Zfp598/Alkbh1/Mknk1/Habp4/Rxra/Ppp1r15b/Bzw2
GO:0006805	xenobiotic metabolic process	2.16154	7.93775e-06	0.000566795	Bphl/Gstm5/As3mt/Pon3/Gstm4/Vkorc1/Cbr1/Aip/Gstp1/Gsto2/Rbbp9/Gstt1/Gstm7/Aldh2/Gstm1/Cyp2j12/Acaa1a/Cyp2j6/Akr1c13/Cyp2e1/Rora/Cyp2d22
GO:0033108	mitochondrial respiratory chain complex assembly	2.05249	8.78232e-06	0.000619263	Ndufaf7/Sdhaf4/Ndufc2/Ndufaf2/Higd2a/Ndufa13/Coa3/Ndufa6/Ndufs2/Ndufs6/Ndufs4/Pet100/Dmac1/Dmac2/Smim20/Surf1/Coa8/Lyrm2/Uqcc2/Atp5f1d/Ndufs5/Ndufaf8/Tmem242/Ndufs7/Timm21/Ndufs8/Uqcc3/Cox14/Uqcrc1/Oma1/Higd1a/Ndufs3/Ndufaf3/Immp2l/Tfam/Coa6/Stmp1/Cox19/Fmc1/Chchd7/Tmem126b/Cox7a2l/Tmem126a/Cox7a1/Ndufaf5/Ndufaf6/Sdhaf3/Uqcc6
GO:0006400	tRNA modification	-1.99509	1.18409e-05	0.000824621	Trmt10a/Gtpbp3/Dus1l/Trmo/Cdkal1/Nsun3/Trmt1l/Mto1/Trmt6/Mettl2/Mettl6/Pus1/Sars1/Sepsecs/Qtrt2/Trmt44/Mettl1/Aars1/Trmt13/Tarbp1/B3gntl1/Trmt1/Akt1/Pusl1/Kti12/Ctu1/Nsun2/Thumpd1/Trmu/Nat10/Alkbh1/Ankrd16/Trub1/Pus7/Trmt10c/Dus3l/Wdr4/Trmt61a
GO:0006120	mitochondrial electron transport, NADH to ubiquinone	2.20661	1.35533e-05	0.000910168	Ndufa7/Ndufc2/Ndufs2/Ndufs6/Ndufa11/Ndufb8/Ndufv2/Ndufb9/Park7/Dnajc15/Ndufb6/Ndufa8/Ndufs7/Ndufs8/Ndufs3/Iscu
GO:0043488	regulation of mRNA stability	-1.8287	1.33902e-05	0.000910168	Dcp1a/Nrde2/Dcp1b/Zfp36/Srsf1/Fto/Zc3h12d/Jak2/Tent4a/Apobec1/Gigyf2/Pnpt1/Parn/Rbm10/Upf1/Dis3l2/Pum1/Fus/Fxr2/Secisbp2/Ago2/Khsrp/Zc3h12a/Tirap/Caprin1/Mlh1/Cnot3/Cul4a/Pde12/Csde1/Fam76b/Mapkapk2/Fastkd5/Mettl16/Ythdf3/Tut7/Fmr1/Larp4b/Celf1/Ythdf1/Larp1/Brf1/Hnrnpu/Piwil2/Patl1/Tbrg4/Rbm47/Syncrip/Tent4b/Eif4enif1/Zfp36l2/Pan2/Mex3d/Dhx36/Qki/Stat3/Arid5a/Myd88
GO:0006403	RNA localization	-1.80665	1.35308e-05	0.000910168	Poldip3/Peg10/Ahctf1/Ranbp2/Bicd2/Atr/Pom121/Alkbh5/Nup214/Nup188/Prpf6/Nup88/Tgfbr2/Hnrnpab/Hnrnpa2b1/Nrde2/Zfp36/Srsf1/Stau2/Thoc5/Nup133/Mcm3ap/Nup98/Stau1/Pabpn1/Rbm15b/Nxf1/Pnpt1/Parn/Casc3/Ddx19b/Nup58/Hsf1/Thoc1/Ddx39a/Ncbp3/Fxr2/Exosc10/Khsrp/Akap8l/Fyttd1/Caprin1/Ythdc1/Nup54/Cpsf6/Atm/Chtop/Nup160/Ppp1r21/Mettl1/Xpo5/Dkc1/Fmr1/G3bp2/Xpot/Xpo1/Iws1/Gle1/Zc3h3/Seh1l/Hnrnpu/Nup153/Fubp3/Ns…
GO:0050684	regulation of mRNA processing	-1.87483	1.65209e-05	0.0010964	Thrap3/Rbm4/Srsf6/Arglu1/Srsf10/Hspa8/Alkbh5/Rbm5/Ddx43/Hnrnpa2b1/Srsf1/Hnrnpk/Nup98/Srsf4/Sltm/Pabpn1/Dazap1/Rbm15b/Rbm15/Arb2a/Rbm10/Upf1/Rbmx/Srrm1/Fip1l1/Ahcyl1/Rbm25/Exosc10/Ptbp1/Obi1/Cdc73/Ythdc1/Adarb1/Prmt5/Mettl16/Rbm39/Fmr1/Celf1/Snw1/Ncl/Iws1/Wdr77/Srsf5/Hnrnpu/Rbm47/Snrnp70/Ncbp1/Dhx36/Safb/Jmjd6/Safb2/Qki/Khdrbs3
GO:0008033	tRNA processing	-1.87505	1.71272e-05	0.00112343	Mettl6/Pus1/Grsf1/Sars1/Ankzf1/Trub2/Sepsecs/Qtrt2/Trmt44/Trnt1/Nemf/Rpp40/Mettl1/Aars1/Trmt13/Tarbp1/B3gntl1/Trmt1/Tsen54/Rtcb/Ptcd1/Akt1/Pusl1/Kti12/Ctu1/Nsun2/Thumpd1/Trmt2a/Trmu/Elac1/Nat10/Alkbh1/Ankrd16/Trub1/Pus7/Trmt10c/Dus3l/Wdr4/Trmt61a
GO:0046854	phosphatidylinositol phosphate biosynthetic process	-2.14987	1.96051e-05	0.00127118	Pi4k2b/Ip6k1/Pik3ca/Pip4k2a/Becn1/Itpkc/Inpp5e/Pip5k1c/Pi4kb/Pik3r4/Pi4ka/Atg14/Ttc7b/Bpnt1/Pik3c3/Fig4/Itpkb/Pik3cg/Pik3cd/Pip4k2c/Pik3c2a/Pik3cb/Atm/Uvrag/Ube3c/Pip4k2b/Pik3r1/Hycc1/Pi4k2a
GO:0002764	immune response-regulating signaling pathway	-1.5107	2.58697e-05	0.00165831	Tab1/Nfkbiz/Fyb1/Znrf1/Tlr1/Lats1/Sppl3/Hspa1b/Map3k20/Myo1g/Slc19a1/Itch/Ikbkg/Nod1/Rela/Pira2/Arf6/Ezr/Dusp3/Slc39a6/Lats2/Rbck1/Cd300ld2/Btla/Cgas/Hspa1a/Nod2/Ccr7/Map3k7/Pde4d/Ms4a1/Zdhhc18/Nfatc2/Lyn/Ddx39a/Trim11/Gpatch3/Ddx60/Plekha1/Prkcb/Pum1/Tnfrsf21/Malt1/Alpk1/Fcgr3/Tnfaip3/Kcnk6/Appl2/Braf/Tbk1/Ufl1/Ripk2/Steep1/Zc3h12a/Trim65/Tirap/Nploc4/Ptprc/Lrrfip2/Map2k3/Frk/Rnf185/Arrb2/Ticam2…
GO:0060711	labyrinthine layer development	-2.1094	2.75225e-05	0.00174443	Plcd3/Ncoa6/Ncoa3/Ncoa1/Spint1/Fbxw8/Hs6st1/Akt1/Ccn1/Llgl2/Socs3/Vash1/Egln1/Rbpj
GO:0006111	regulation of gluconeogenesis	-2.05931	3.33722e-05	0.00209169	Ctdspl2/Ranbp2/Cry1/Sik1/Oprm1/Hif1a/Wdr5/Fbp1/Ep300/Prkag2/Ppp4r3a/Slc35b4/Ppp4r3b/Supt20/Dgkq/Mtcl2/Sirt1/Ddb1/Ppara/Tcf7l2/Ogt/Clk2/Sesn2/Xpc/Zfp692/Kat2a/Usp7
GO:0033120	positive regulation of RNA splicing	-2.10407	3.40155e-05	0.00210859	Ern1/Thrap3/Hspa8/Srsf1/Nup98/Dazap1/Hspa1a/Upf1/Rbmx/Polr2a/Exosc10/Obi1/Prmt5/Snw1/Ncl/Wdr77/Srsf5/Pik3r1/Snrnp70/Ncbp1/Hnrnpll/Habp4/Zpr1/Slc38a2/Khdrbs3
GO:0002221	pattern recognition receptor signaling pathway	-1.62239	3.59755e-05	0.00220584	Tab1/Nfkbiz/Znrf1/Tlr1/Lats1/Hspa1b/Map3k20/Slc19a1/Itch/Nod1/Rela/Arf6/Lats2/Cgas/Hspa1a/Nod2/Map3k7/Zdhhc18/Lyn/Ddx39a/Trim11/Gpatch3/Ddx60/Pum1/Alpk1/Tnfaip3/Kcnk6/Appl2/Tbk1/Ufl1/Ripk2/Steep1/Trim65/Tirap/Nploc4/Lrrfip2/Map2k3/Frk/Rnf185/Arrb2/Ticam2/Cd300lf/Pik3ap1/Traf6/Ccdc134/Xpnpep1/Plcg2/Zdhhc9/Ap3b1/Appl1/Mavs/Ogt/Gdi1/Irak4/Ddx56/Mfhas1/Dpp9/Mapkapk2/Hspd1/Cpt1a/Zdhhc5/Trim3/Gm6377/Ub…
GO:0034063	stress granule assembly	-2.17211	3.67475e-05	0.00222895	Hif1a/Ogfod1/C9orf72/Hsf1/Caprin1/Prkaa1/Csde1/Ubap2l/Trim21/Mettl1/Ythdf3/Fmr1/G3bp2/Ythdf1/Usp10/G3bp1/Atxn2/Lsm14a/Qki
GO:0007000	nucleolus organization	-2.23613	4.03289e-05	0.00242016	Suv39h1/Pes1/Baz2a/Bend3/Smarca5/Ubtf/Zfp354a/Sirt1/Phf8/Phf2/Rrp8/Usp36/Polr1b/Rrn3/Nolc1
GO:0009157	deoxyribonucleoside monophosphate biosynthetic process	2.19065	4.26705e-05	0.00253373	Tk1/Dhfr/Tyms/Dguok/Dut/Adk/Dck
GO:0010257	NADH dehydrogenase complex assembly	2.07241	4.73239e-05	0.00272402	Ndufaf7/Ndufc2/Ndufaf2/Ndufa13/Ndufa6/Ndufs2/Ndufs6/Ndufs4/Dmac1/Dmac2/Lyrm2/Ndufs5/Ndufaf8/Ndufs7/Timm21/Ndufs8/Ndufs3/Ndufaf3
GO:0032981	mitochondrial respiratory chain complex I assembly	2.07241	4.73239e-05	0.00272402	Ndufaf7/Ndufc2/Ndufaf2/Ndufa13/Ndufa6/Ndufs2/Ndufs6/Ndufs4/Dmac1/Dmac2/Lyrm2/Ndufs5/Ndufaf8/Ndufs7/Timm21/Ndufs8/Ndufs3/Ndufaf3
GO:0050779	RNA destabilization	-1.88706	4.67056e-05	0.00272402	Alkbh5/Cnot7/Dcp1a/Dcp1b/Zfp36/Fto/Zc3h12d/Tent4a/Gigyf2/Pnpt1/Parn/Upf1/Dis3l2/Pum1/Zc3h18/Fxr2/Ago2/Khsrp/Zc3h12a/Tnfrsf1b/Caprin1/Mlh1/Cnot3/Cul4a/Pde12/Csde1/Mettl16/Ythdf3/Tut7/Fmr1/Celf1/Ythdf1/Hnrnpu/Piwil2/Patl1/Syncrip/Tent4b/Eif4enif1/Zfp36l2/Pan2/Mex3d/Dhx36/Qki
GO:0098869	cellular oxidant detoxification	2.02917	4.91241e-05	0.00279908	Prdx4/Prxl2a/Sod1/Prdx2/Mgst3/Dhfr/Prdx1/Txn1/Gpx4/Gstk1/Gsto2/Prxl2b/Cat/Gstt1/Gstm7/Park7/Gpx7/Mt3/Txndc17/Selenot/Selenow/Txnrd2/Ccs/Prdx6/Gpx1/Prdx5/Cd36/Sesn1/Ltc4s
GO:0019884	antigen processing and presentation of exogenous antigen	2.07692	5.03055e-05	0.00283624	H2-K1/H2-M3/H2-DMa/Unc93b1/B2m/H2-Aa/H2-Ab1/Clec4a2/Mpeg1/Psme2/Psme1/H2-DMb1/H2-Eb1/Cd74/H2-Ob/Fcer1g/Tapbp/H2-Oa
GO:0002757	immune response-activating signaling pathway	-1.49472	5.07818e-05	0.00283624	Tab1/Nfkbiz/Fyb1/Znrf1/Tlr1/Lats1/Sppl3/Hspa1b/Map3k20/Myo1g/Slc19a1/Itch/Ikbkg/Nod1/Rela/Arf6/Ezr/Dusp3/Slc39a6/Lats2/Rbck1/Cd300ld2/Cgas/Hspa1a/Nod2/Ccr7/Map3k7/Pde4d/Ms4a1/Zdhhc18/Nfatc2/Lyn/Ddx39a/Trim11/Gpatch3/Ddx60/Plekha1/Prkcb/Pum1/Tnfrsf21/Malt1/Alpk1/Tnfaip3/Kcnk6/Appl2/Braf/Tbk1/Ufl1/Ripk2/Steep1/Zc3h12a/Trim65/Tirap/Nploc4/Ptprc/Lrrfip2/Map2k3/Frk/Rnf185/Arrb2/Ticam2/Cd300lf/Pik3ap1/…
GO:0006575	modified amino acid metabolic process	1.79115	5.38799e-05	0.00297977	Gatm/Duoxa1/Gstm5/Sod1/Ggh/Slc46a1/Gamt/Hpn/Ptdss2/Gstm4/Abhd12/Dhfr/Tyms/Gstp1/Gstk1/Slco1c1/Mthfs/Crym/Arl6ip5/Gsto2/Lpcat3/Cryab/Rnf7/Slc1a2/Acadl/Gstt1/Ckb/Gstm7/Park7/Ndp/Slc22a4/Slc16a2/Gstm1/Aldh7a1/Snca/Cpq/Gstt3/Hpgds/Ctsb/Cpt1c/Chac2/Aaas/Gstm6/Ethe1/Sardh/Gpx1/Crat/Mboat1/Hagh/Mthfsl/Ass1/Gstz1/Ggact/Slc5a5/Gclm/Slc16a10
GO:0061014	positive regulation of mRNA catabolic process	-1.87899	5.4585e-05	0.00298945	Alkbh5/Cnot7/Dcp1a/Dcp1b/Zfp36/Fto/Zc3h12d/Jak2/Tent4a/Gigyf2/Pnpt1/Parn/Upf1/Dis3l2/Pum1/Fxr2/Ago2/Khsrp/Zc3h12a/Caprin1/Mlh1/Cnot3/Cul4a/Pde12/Csde1/Mettl16/Ythdf3/Tut7/Fmr1/Celf1/Ythdf1/Hnrnpu/Piwil2/Patl1/Syncrip/Tent4b/Eif4enif1/Zfp36l2/Pan2/Mex3d/Dhx36/Qki/Stat3
GO:0051056	regulation of small GTPase mediated signal transduction	-1.66466	5.62789e-05	0.00305259	Dock10/Sipa1l1/Dlc1/Flcn/Rasip1/Rasal3/Dennd4c/Wnk1/Arhgap29/Dennd1a/Rasgrp1/Prag1/Stard13/Cdc42se2/Stard8/Rgl2/Kras/Map4k4/Arhgap22/Fxr1/Dock2/Tsc2/Dennd4b/Arfgef1/Rapgef1/Rdx/Mapkap1/Spry4/Adra1a/Arhgef18/Dock6/Sos1/Itgb1/Dennd3/Shoc2/Arhgap12/Crkl/Csf1/Git2/Cyth3/Heg1/Stambp/Abca1/Sipa1l3/Rasgrf1/Myo9b/Syngap1/Rasa3/Arfgap1/Kctd10/Gmip/Ppp2cb/Ephb2/Arf6/Ripor1/Arhgef2/Ccr7/Fbp1/Cdkl5/Arfgef2/S…
GO:0044282	small molecule catabolic process	1.62056	6.4728e-05	0.00347743	Oxct1/Afmid/Sord/Haao/Adtrp/Nagk/Decr1/Glb1/Ldhb/Acads/Cryl1/Pon3/Mtln/Pccb/Renbp/Akr1a1/Oaz1/Cbr1/Eno3/Trp53/Bckdha/Upp2/Qprt/Bdh2/Hsd17b10/Khk/Nudt7/Enpp4/Srd5a3/Pnkd/Acadl/Adhfe1/Src/Qdpr/Park7/Aldh2/Fah/Acad12/Esd/Amdhd2/Acat1/Glb1l2/Mpi/Tpi1/Hadhb/Bad/Aldoa/Aldh7a1/Gnpda1/Acaa1a/Etfa/Bckdk/Pgk1/Bcat2/Ech1/Acot7/Hk2/Mccc2/Decr2/Aldh1a1/Abhd1/Ivd/Sardh/Pgam1/Pnp2/Ilvbl/Crat/Etfb/Kmo/Upb1/Blmh/…
GO:0051168	nuclear export	-1.75942	6.87906e-05	0.00366083	Poldip3/Uhmk1/Ctdspl2/Ranbp2/Adar/Gas6/Pom121/Alkbh5/Nup214/Nup188/Nup88/Hnrnpa2b1/Nrde2/Thoc5/Nup133/Mcm3ap/Nup98/Pabpn1/Rbm15b/Nxf1/Casc3/Ddx19b/Pkd1/Xpo4/Rbm10/Thoc1/Ddx39a/Ncbp3/Nmd3/Ahcyl1/Malt1/Akap8l/Fyttd1/Cse1l/Akap13/Xpo7/Rangap1/Riok2/Nop9/Ythdc1/Nemf/Cpsf6/Chtop/Fam76b/Nup160/Xpo5/Xpo6/Wipf1/Fmr1/Xpot/Mdm2/Xpo1/Iws1/Gle1/Nup153/Nsun2/Bag3/Ncbp1/Eif4enif1/Nol6/Prpf4b/Hspa9/Lsg1/Ltv1/Sd…
GO:0030522	intracellular receptor signaling pathway	-1.56274	7.11767e-05	0.00375241	Rara/Tab1/Aloxe3/Znrf1/Lats1/Hspa1b/Kdm4c/Map3k20/Slc19a1/Ube3a/Itch/Nod1/Rela/Jak2/Lats2/Smarca4/Cgas/Hspa1a/Aldh1a3/Kdm3a/Nod2/Map3k7/Paqr3/Ncoa3/Ep300/Rnf6/Zdhhc18/Ddx39a/Trim11/Gpatch3/Ddx60/Huwe1/Pum1/Hdac6/Alpk1/Zdhhc7/Ppargc1b/Tnfaip3/Shq1/Clock/Kcnk6/Fam120b/Tbk1/Ufl1/Ahr/Ripk2/Steep1/Trim65/Akap13/Ncoa1/Tirap/Nploc4/Bmal1/Vps11/Map2k3/Frk/Rnf185/Sirt1/Trim68/Ppp5c/Trip4/Pik3ap1/Traf6/Per…
GO:0006123	mitochondrial electron transport, cytochrome c to oxygen	2.13932	7.55519e-05	0.00387444	Cox6a1/Cox4i1/Cox8a/Cox7a2/Cox5b/Cox7b/Cox4i2/Cox6a2/Cox7c/Cox5a/mt-Co3/Cox7a2l/Cox7a1
GO:0000462	maturation of SSU-rRNA from tricistronic rRNA transcript (SSU-rRNA, 5.8S rRNA, LSU-rRNA)	-2.07161	7.41913e-05	0.00387444	Bysl/Nop9/Rpp40/Nol10/Tsr1/Wdr46/Utp6/Kri1/Tbl3/Heatr1/Pwp2/Wdr43/Rrs1/Utp4
GO:0061013	regulation of mRNA catabolic process	-1.74201	7.51535e-05	0.00387444	Alkbh5/Cnot7/Hnrnpab/Dcp1a/Nrde2/Dcp1b/Zfp36/Srsf1/Fto/Zc3h12d/Jak2/Tent4a/Apobec1/Pkp3/Gigyf2/Pnpt1/Parn/Casc3/Rbm10/Upf1/Dis3l2/Pum1/Fus/Fxr2/Secisbp2/Ago2/Khsrp/Dhx34/Zc3h12a/Tirap/Caprin1/Mlh1/Cnot3/Cul4a/Pde12/Csde1/Fam76b/Mapkapk2/Fastkd5/Mettl16/Ythdf3/Tut7/Fmr1/Larp4b/Celf1/Ythdf1/Larp1/Brf1/Hnrnpu/Piwil2/Patl1/Tbrg4/Rbm47/Syncrip/Tent4b/Eif4enif1/Zfp36l2/Pan2/Mex3d/Dhx36/Qki/Stat3/Arid5a…
GO:0000956	nuclear-transcribed mRNA catabolic process	-1.82238	7.75655e-05	0.00390851	Nbas/Thrap3/Cpeb3/Smg7/Edc3/Cnot7/Hnrnpab/Dcp1a/Dcp1b/Zfp36/Skic3/Smg9/Tent4a/Apobec1/Parn/Casc3/Etf1/Skic2/Upf1/Dis3l2/Secisbp2/Exosc10/Ago2/Dhx34/Zc3h12a/Caprin1/Mlh1/Cnot3/Pde12/Exosc2/Atm/Csde1/Edc4/Tesk1/Smg5/Fmr1/Smg8/Hnrnpu/Xrn2/Mrto4/Patl1/Syncrip/Ncbp1/Tent4b/Eif4enif1/Zfp36l2/Pan2/Dhx36/Zcchc7/Dis3
GO:0002758	innate immune response-activating signaling pathway	-1.58088	7.76021e-05	0.00390851	Tab1/Nfkbiz/Znrf1/Tlr1/Lats1/Hspa1b/Map3k20/Slc19a1/Itch/Nod1/Rela/Arf6/Lats2/Cgas/Hspa1a/Nod2/Map3k7/Zdhhc18/Lyn/Ddx39a/Trim11/Gpatch3/Ddx60/Pum1/Alpk1/Tnfaip3/Kcnk6/Appl2/Tbk1/Ufl1/Ripk2/Steep1/Trim65/Tirap/Nploc4/Lrrfip2/Map2k3/Frk/Rnf185/Arrb2/Ticam2/Cd300lf/Pik3ap1/Traf6/Ccdc134/Xpnpep1/Plcg2/Zdhhc9/Ap3b1/Appl1/Mavs/Ogt/Gdi1/Irak4/Ddx56/Mfhas1/Dpp9/Mapkapk2/Hspd1/Cpt1a/Zdhhc5/Trim3/Gm6377/Ub…
GO:0070536	protein K63-linked deubiquitination	-2.10597	8.31138e-05	0.00414907	Usp9x/Shmt2/Vcp/Atxn3/Cyld/Otud7b/Otub2/Stambp/Usp8/Spata2/Otud5/Yod1/Usp20/Abraxas2/Tnfaip3/Usp33/Usp25/Otud4/Usp27x
GO:0002218	activation of innate immune response	-1.56069	9.41933e-05	0.00466092	Tab1/Nfkbiz/Znrf1/Tlr1/Lats1/Hspa1b/Map3k20/Sfpq/Slc19a1/Itch/Nod1/Rela/Arf6/Lats2/Cgas/Hspa1a/Nod2/Map3k7/Zdhhc18/Lyn/Ddx39a/Trim11/Gpatch3/Ddx60/Pum1/Alpk1/Tnfaip3/Kcnk6/Appl2/Tbk1/Ufl1/Ripk2/Steep1/Trim65/Tirap/Nploc4/Lrrfip2/Map2k3/Frk/Rnf185/Arrb2/Ticam2/Cd300lf/Pik3ap1/Traf6/Ccdc134/Xpnpep1/Plcg2/Zdhhc9/Ap3b1/Appl1/Mavs/Ogt/Gdi1/Matr3/Irak4/Ddx56/Mfhas1/Dpp9/Mapkapk2/Hspd1/Cpt1a/Zdhhc5/Xrcc…
GO:0007088	regulation of mitotic nuclear division	1.80942	9.9526e-05	0.00488197	Cav2/Mad2l1/Ywhah/Zwilch/Spdl1/Pebp1/Birc5/Aurkb/Cdca2/Spc24/Igf1/Nuf2/Ndc80/Anapc11/Bub1/Mki67/Kntc1/Spc25/Cdca8/Nusap1/Edn3/Haspin/Rad21/Ube2c/Lcmt1/Cdc20/Cul7/Mad2l1bp/Plk1/Tubg1/Anapc7/Bub1b/Nsmce2/Ska1/Ccnb1/Pdgfb/Cdc42/Trip13/Nme6/Zwint/Ik
GO:0006405	RNA export from nucleus	-1.91475	0.000101459	0.0049339	Wnk1/Thoc2l/Thoc2/Rae1/Nup107/Pcid2/Ddx19a/Dhx9/Mettl14/Zc3h11a/Rbm33/Poldip3/Ranbp2/Pom121/Alkbh5/Nup214/Nup188/Nup88/Hnrnpa2b1/Nrde2/Thoc5/Nup133/Mcm3ap/Nup98/Pabpn1/Rbm15b/Nxf1/Casc3/Ddx19b/Thoc1/Ddx39a/Ncbp3/Akap8l/Fyttd1/Ythdc1/Cpsf6/Chtop/Nup160/Xpo5/Fmr1/Xpot/Xpo1/Iws1/Gle1/Nup153/Nsun2/Ncbp1/Nol6
GO:0061157	mRNA destabilization	-1.87441	0.000106198	0.0051202	Alkbh5/Cnot7/Dcp1a/Dcp1b/Zfp36/Fto/Zc3h12d/Tent4a/Gigyf2/Pnpt1/Parn/Upf1/Dis3l2/Pum1/Fxr2/Ago2/Khsrp/Zc3h12a/Caprin1/Mlh1/Cnot3/Cul4a/Pde12/Csde1/Mettl16/Ythdf3/Tut7/Fmr1/Celf1/Ythdf1/Hnrnpu/Piwil2/Patl1/Syncrip/Tent4b/Eif4enif1/Zfp36l2/Pan2/Mex3d/Dhx36/Qki
GO:0035265	organ growth	-1.68267	0.000111332	0.00532225	Dusp6/Bnc2/Ctdspl2/Enpp1/Thbs1/Ecm1/Zfp418/Heg1/Vgll4/Wwc2/Tgfbr2/Acacb/Rara/Lats1/Ube3a/Smad1/Lats2/Stk3/Sav1/Ep300/Kdr/Rbm10/Tenm4/Fdps/Pdlim5/Atf2/Ccm2l/Ahr/Akap13/Zmpste24/Sirt1/Comp/Pten/Ppara/Tcf7l2/Map2k4/Fes/Ttn/Notch1/Por/Ctdp1/Col14a1/Ext1/Camk2d/Gsk3a/Akt1/Ybx3/Fosl2/Stk4/Flvcr1/Ptk2/Tomm70a/Rxra/Bcl2/Carm1/Meis1/Serp1/Cdk20/Rbpj
GO:0016073	snRNA metabolic process	-1.97964	0.000114141	0.00541068	Ints4/Zc3h8/Ints7/Ell/Ints6l/Fto/Ints10/Ice1/Toe1/Ints11/Exosc10/Mettl4/Ice2/Ints14/Exosc2/Ints6/Dkc1/Ints8/Mettl16/Snapc1/Ints5/Tut1/Snapc4/Ints13/Uspl1/Zcchc7
GO:0048002	antigen processing and presentation of peptide antigen	1.95051	0.00011871	0.00553426	Trem2/H2-K1/H2-M3/H2-DMa/Unc93b1/B2m/H2-Aa/H2-T23/H2-Ab1/Clec4a2/Mpeg1/H2-Q4/H2-DMb1/H2-D1/H2-Eb1/H2-Q9/H2-Q7/H2-T22/Cd74/H2-Ob/Fcer1g/Tapbp/H2-Oa/Ulbp1
GO:0043255	regulation of carbohydrate biosynthetic process	-1.83328	0.000118315	0.00553426	Ctdspl2/Enpp1/Ranbp2/Cry1/Sik1/Dyrk2/Oprm1/Hif1a/Wdr5/Ap2a1/Akt2/Fbp1/Ep300/Prkag2/Ppp4r3a/Slc35b4/Ppp4r3b/Gfpt1/Supt20/Sorbs1/Dgkq/Mtcl2/Sirt1/Ddb1/Ppara/Tcf7l2/Ogt/Grk2/Clk2/Sesn2/Plek/Xpc/Akt1/Ppp1r3b/Zfp692/Irs2/Kat2a/Usp7/Ppp1r3d/Cd244a
GO:0006109	regulation of carbohydrate metabolic process	-1.68833	0.000134348	0.00621196	Foxk2/Sik1/Acacb/Dyrk2/Mlst8/Oprm1/Hif1a/Pdk4/Nupr1/Wdr5/Ap2a1/Akt2/Fbp1/Ep300/Prkag2/Ppp4r3a/Slc35b4/Ppp4r3b/Gfpt1/Supt20/Sorbs1/Dgkq/Zmpste24/Slc25a12/Mtcl2/Sirt1/Arnt/Nfe2l1/Prkaa1/Myc/Ddb1/Ppara/Ddit4/Tcf7l2/Ogt/Psen1/Grk2/Clk2/Sesn2/Mlxipl/Plek/Xpc/Akt1/Ppp1r3b/Gpd1/Zfp692/App/Irs2/Kat2a/Usp7/Ppp1r3d/Hdac4/Tigar/Stat3/Cd244a/Git1
GO:0000375	RNA splicing, via transesterification reactions	-1.5463	0.000138793	0.0063653	Dhx38/Mettl14/Gpatch8/Scaf11/Cdc5l/Cactin/Coil/Prpf31/Hnrnpm/Sfswap/Dhx40/Rbm17/Thrap3/Yju2/Rbm4/Srsf6/Sf3b1/Arglu1/Gm25549/Srsf10/Cenatac/Fbxo24/Dhx8/Hspa8/Cwf19l2/Prpf6/Gcfc2/Rbm5/Prpf40b/Ddx43/Xab2/Hnrnpa2b1/Aqr/Sart3/Srsf1/Mfap1a/Hnrnpk/Nup98/Srsf4/Sfpq/Sf1/Slu7/Dazap1/Rbm15b/Cwc25/Rbm15/Casc3/Gm23303/Arb2a/Rbm10/Upf1/Ddx39a/Rbmx/Srrm1/Prpf18/Tfip11/Usp4/Rbm25/Exosc10/Sf3b2/Usp39/Rnpc3/Ptbp1/…
GO:0006913	nucleocytoplasmic transport	-1.51909	0.000151196	0.00682317	Ctdspl2/Ahctf1/Rbm4/Ranbp2/Adar/Fbxo22/Syk/Hspa8/Gas6/Pom121/Alkbh5/Nup214/Nup188/Nup88/Ipo9/Hnrnpa2b1/Flna/Nrde2/Cry2/Ppp1cc/Thoc5/Nup133/Mcm3ap/Nup98/Jak2/Pabpn1/Stk3/Rbm15b/Nxf1/Fam53c/Casc3/Ddx19b/Agap3/Pkd1/Ep300/Xpo4/Nup58/Rbm10/Mlxip/Thoc1/Ddx39a/Ncbp3/Nmd3/Ahcyl1/Malt1/Atf2/Kpna4/Nos3/Ipo7/Appl2/Akap8l/Tbk1/Fyttd1/Cse1l/Zc3h12a/Akap13/Xpo7/Bmal1/Axin1/Rangap1/Riok2/Kpna2/Nop9/Prickle1/Yth…
GO:0051169	nuclear transport	-1.51909	0.000151196	0.00682317	Ctdspl2/Ahctf1/Rbm4/Ranbp2/Adar/Fbxo22/Syk/Hspa8/Gas6/Pom121/Alkbh5/Nup214/Nup188/Nup88/Ipo9/Hnrnpa2b1/Flna/Nrde2/Cry2/Ppp1cc/Thoc5/Nup133/Mcm3ap/Nup98/Jak2/Pabpn1/Stk3/Rbm15b/Nxf1/Fam53c/Casc3/Ddx19b/Agap3/Pkd1/Ep300/Xpo4/Nup58/Rbm10/Mlxip/Thoc1/Ddx39a/Ncbp3/Nmd3/Ahcyl1/Malt1/Atf2/Kpna4/Nos3/Ipo7/Appl2/Akap8l/Tbk1/Fyttd1/Cse1l/Zc3h12a/Akap13/Xpo7/Bmal1/Axin1/Rangap1/Riok2/Kpna2/Nop9/Prickle1/Yth…
GO:0071826	protein-RNA complex organization	-1.66691	0.00016401	0.00728487	Yju2/Srsf6/Rpl24/Adar/Sf3b1/Eif4h/Gm25549/Srsf10/Eif3j2/Atr/Xrcc5/Prpf6/Gcfc2/Rbm5/Xab2/Sart3/Srsf1/Eif3c/Slu7/Faf2/Eif3j1/Gm23303/Kif5b/Rbmx/Prpf18/Tfip11/Usp4/Nvl/Ago2/Eif3a/Shq1/Mdn1/Usp39/Mettl17/Ddx42/Gm24924/Sf3a1/Ythdc1/Sf3a2/Atm/Prmt5/Trim21/Eif2s2/Dhx29/Dkc1/Prpf3/Rnu12/Crnkl1/Htatsf1/Eif5/Celf1/Luc7l/Gemin5/Wdr77/Gm23205/Khdc4/Mrto4/Ddx20/Rcc1l/Rrp7a/Ncbp1/Dhx30/Eif3b/Gm22378/Bop1/Prpf4…
GO:0016236	macroautophagy	-1.50523	0.000163864	0.00728487	Spart/Rubcn/Vps16/Eif2ak1/Srebf1/Lgals8/Atg2b/Vps41/Ambra1/9930111J21Rik1/Irgq/Pex12/Gm5431/Vps37c/Hmox1/Fyco1/Rnf41/Hif1a/Pik3r4/Hdac10/Yod1/Rab43/Znrf1/Nupr1/Dele1/Vps39/Ephb2/Dnm1l/Ikbkg/Nod1/Poldip2/Ift88/Bcl2l13/Atg14/Vps4b/Nod2/Stam/Map3k7/Ap5z1/Ep300/Kdr/C9orf72/Wdfy3/Atg4d/Arhgap26/Huwe1/Hdac6/Chmp7/Pik3c3/Nbr1/Wipi2/Atg9a/Rab3gap2/Supt5/Usp30/Stx12/Tbk1/Pip4k2c/Ufl1/Ripk2/Usp33/Fbxl4/Atp…
GO:0000377	RNA splicing, via transesterification reactions with bulged adenosine as nucleophile	-1.54756	0.000169213	0.00739946	Dhx38/Mettl14/Gpatch8/Scaf11/Cdc5l/Cactin/Coil/Prpf31/Hnrnpm/Sfswap/Dhx40/Rbm17/Thrap3/Yju2/Rbm4/Srsf6/Sf3b1/Arglu1/Gm25549/Srsf10/Cenatac/Fbxo24/Dhx8/Hspa8/Cwf19l2/Prpf6/Gcfc2/Rbm5/Prpf40b/Ddx43/Xab2/Hnrnpa2b1/Aqr/Sart3/Srsf1/Mfap1a/Hnrnpk/Nup98/Srsf4/Sfpq/Sf1/Slu7/Dazap1/Rbm15b/Cwc25/Rbm15/Casc3/Gm23303/Arb2a/Rbm10/Upf1/Ddx39a/Rbmx/Srrm1/Prpf18/Tfip11/Usp4/Rbm25/Exosc10/Sf3b2/Usp39/Rnpc3/Ptbp1/…
GO:0000398	mRNA splicing, via spliceosome	-1.54756	0.000169213	0.00739946	Dhx38/Mettl14/Gpatch8/Scaf11/Cdc5l/Cactin/Coil/Prpf31/Hnrnpm/Sfswap/Dhx40/Rbm17/Thrap3/Yju2/Rbm4/Srsf6/Sf3b1/Arglu1/Gm25549/Srsf10/Cenatac/Fbxo24/Dhx8/Hspa8/Cwf19l2/Prpf6/Gcfc2/Rbm5/Prpf40b/Ddx43/Xab2/Hnrnpa2b1/Aqr/Sart3/Srsf1/Mfap1a/Hnrnpk/Nup98/Srsf4/Sfpq/Sf1/Slu7/Dazap1/Rbm15b/Cwc25/Rbm15/Casc3/Gm23303/Arb2a/Rbm10/Upf1/Ddx39a/Rbmx/Srrm1/Prpf18/Tfip11/Usp4/Rbm25/Exosc10/Sf3b2/Usp39/Rnpc3/Ptbp1/…
GO:0043489	RNA stabilization	-1.84243	0.000172134	0.00746928	Nrde2/Zfp36/Srsf1/Jak2/Tent4a/Apobec1/Parn/Rbm10/Fus/Secisbp2/Ago2/Tirap/Csde1/Fam76b/Mettl1/Mapkapk2/Dkc1/Mettl16/Larp4b/Larp1/Hnrnpu/Akt1/Rbm47/Nsun2/Syncrip/Tent4b/Eif4enif1/Dhx36/Qki/Stat3/Wdr4/Arid5a/Myd88
GO:0061982	meiosis I cell cycle process	1.81266	0.000184148	0.0079296	Ccne2/Ccne1/Syce2/Pkmyt1/Rad51ap1/Birc5/Rad51/Kash5/Ndc80/Cks2/Cenpx/Cdc25b/Rad51c/Top2a/Haspin/Rad54l/Aurka/Ube2b/Cenps/Slc2a8/Cdc20/Brca2/Msh5/Cntd1/Plk1/Brme1/Brip1/Tex12/Rad54b/M1ap/Iho1/Pttg1/Fancm/Fancd2/Rmi1/Hsf2bp/Trip13/Terf1/Zwint/Ccnb2/Ubb
GO:0006122	mitochondrial electron transport, ubiquinol to cytochrome c	2.10876	0.000189565	0.00810102	Uqcr11/Uqcr10/Uqcrq/Uqcrb/Uqcrh/Uqcc3/Uqcrfs1/Uqcrc1/Uqcrc2
GO:2000234	positive regulation of rRNA processing	-2.10106	0.000193964	0.00820065	Riok2/Dimt1/Utp15/Heatr1/Wdr43/Riok1/Wdr75
GO:0032543	mitochondrial translation	1.73559	0.000194804	0.00820065	Lars2/Mrpl14/Cdk5rap1/Mrpl39/Mrpl34/Mrps11/Mrps18c/Mrpl43/Coa3/Mrps21/Mrpl44/Mrps33/Mrps15/Mrpl42/Uqcc2/Mrpl51/Mrpl18/Mrpl27/Mrpl48/Mrps16/Mrpl13/Mrps14/Mrpl22/Mrpl28/Mrpl4/Mrpl45/Mrpl30/Mrpl23/Gatb/Mrpl37/Aurkaip1/Mrpl52/Mrpl17/Mrps28/Mpv17l2/Mrpl1/Mrpl54/Mrps24/Mrps18a/Mrpl11/Mrpl55/Mrpl57/Mrpl36/Chchd1/Mrpl3/Mrpl46/Mrps25/Mrpl41/Gadd45gip1/Mrps9/Malsu1/Mrpl20/Mrpl21/Mrpl58/Mrps7/Mrpl47/Mrpl40/…
GO:0045624	positive regulation of T-helper cell differentiation	-2.03717	0.000203992	0.00852383	Brd2/Rara/Nfkbiz/Ccr7/Ep300/Opa1/Malt1/Ripk2/Socs5/Gpr65/Nlrp3/Il4ra
GO:0040029	epigenetic regulation of gene expression	-1.58083	0.000207759	0.00861743	Lbr/Kmt2d/Msl2/Rlim/Mecp2/Rb1/Ehmt1/Nrde2/Ctcf/Suv39h1/Suz12/Zfp445/Baz2a/Bend3/Setdb1/Hnrnpk/Wdr5/Sgf29/Smarcad1/Apobec1/Smarca4/Rbm15b/Bap1/Kdm1a/Rbm15/Kdm2a/Ep300/Arb2a/Fkbp6/Arid4b/Upf1/Ctr9/Hdac6/Kdm1b/Smarca5/Baz1a/H3c6/Atf2/Uty/Exosc10/Tnrc18/Zfp335/Mettl4/Ubtf/Zmpste24/Axin1/Spty2d1/Sirt1/Pphln1/Tasor2/Phf8/Kat7/Mbd1/Ythdc1/Phf2/Smarcd1/Firre/Rlf/Myc/Ddb1/Prmt5/Cdyl/Tle6/Rbbp5/Tdg/Crebzf/…
GO:0019827	stem cell population maintenance	-1.67192	0.000209707	0.00863474	Bicral/Sav1/Smarca4/Kdm3a/Kdm2b/Ss18/Ncoa3/Tead3/Arid4b/Dis3l2/Srrt/Ctr9/Leo1/Med12/Dpf2/Yme1l1/Braf/Brd9/Cdc73/Cnot3/Smarcd1/Cul4a/Fzd7/Wdr47/Myc/Tcf7l2/Taf5l/Ogt/Notch1/Klf10/Mcph1/Ski/Zc3h13/Trim8/Paf1/Phf10/Raf1/Med15/Setd6/Piwil2/Eif4enif1/Zfp36l2/Kat2a/Sinhcaf/Stat3/Wdr43/Gnl3/Rbpj
GO:0002478	antigen processing and presentation of exogenous peptide antigen	2.04331	0.000219568	0.00897525	H2-K1/H2-M3/H2-DMa/Unc93b1/B2m/H2-Aa/H2-Ab1/Clec4a2/Mpeg1/H2-DMb1/H2-Eb1/Cd74/H2-Ob/Fcer1g/Tapbp/H2-Oa
GO:0002679	respiratory burst involved in defense response	2.08644	0.000230275	0.00934517	Slamf8/Trem2/Prdx2/Selenok/Lipa/Rps19/Dusp10/Grn
GO:0060716	labyrinthine layer blood vessel development	-2.09453	0.000243774	0.00982234	Plcd3/Ncoa6/Fbxw8/Hs6st1/Akt1/Ccn1/Llgl2/Vash1/Rbpj
GO:1902369	negative regulation of RNA catabolic process	-1.78525	0.000253238	0.01006	Hnrnpab/Nrde2/Zfp36/Srsf1/Jak2/Tent4a/Apobec1/Pkp3/Parn/Rbm10/Fus/Secisbp2/Ago2/Dhx34/Tirap/Csde1/Fam76b/Mettl1/Mapkapk2/Dkc1/Mettl16/Larp4b/Larp1/Hnrnpu/Akt1/Rbm47/Nsun2/Syncrip/Tent4b/Eif4enif1/Dhx36/Qki/Stat3/Wdr4/Arid5a/Myd88
GO:0001892	embryonic placenta development	-1.78215	0.000252295	0.01006	Hif1a/Plcd3/Stk3/Ncoa6/Ncoa3/Pkd1/Hsf1/Ncoa1/Arnt/Spint1/Fbxw8/Egfr/Slc8a1/Cebpb/Sp3/Hs6st1/Akt1/Ccn1/Stk4/Llgl2/Socs3/Vash1/Egln1/Rbpj
GO:0002428	antigen processing and presentation of peptide antigen via MHC class Ib	2.04665	0.00025558	0.010082	H2-K1/H2-M3/B2m/H2-T23/H2-Q4/H2-D1/H2-Q9/H2-Q7/H2-T22/Ulbp1
GO:0034655	nucleobase-containing compound catabolic process	-1.44141	0.000262203	0.0102714	Zfp36/Srsf1/Hif1a/Zswim8/Fto/Zc3h12d/Skic3/Nupr1/Hspa1b/Apaf1/Smg9/Ints10/Jak2/Tent4a/Ncf1/Bcl2l13/Apobec1/Pkp3/Gigyf2/Pfkfb4/Hspa1a/Fbh1/Pnpt1/Parn/Fbp1/Casc3/Ep300/Pde4d/Xpo4/Hsf1/Rbm10/Etf1/Prkag2/Skic2/Upf1/Dis3l2/Pum1/Zc3h18/Fus/Grsf1/Fxr2/Secisbp2/Ints11/Mtrex/Exosc10/Ago2/Khsrp/Dhx34/Fkrp/Zc3h12a/Tnfrsf1b/Rnaseh1/Tirap/Pde8a/Caprin1/Mlh1/Ampd3/Ints14/Arnt/Cnot3/Prkaa1/Ogdh/Trnt1/Snd1/Cul4a…
GO:0016241	regulation of macroautophagy	-1.69081	0.000272215	0.0105901	Rubcn/Eif2ak1/Srebf1/Ambra1/Hmox1/Fyco1/Rnf41/Hif1a/Pik3r4/Nupr1/Dele1/Dnm1l/Ikbkg/Nod1/Poldip2/Atg14/Nod2/Map3k7/Kdr/C9orf72/Huwe1/Hdac6/Pik3c3/Rab3gap2/Supt5/Usp30/Tbk1/Pip4k2c/Ufl1/Ripk2/Usp33/Fbxl4/Atp13a2/Tsc1/Sirt1/Wdr24/Atg2a/Wac/Tbc1d25/Atm/Atg7/Pafah1b2/Pptc7/Ubqln1/Sesn2/Pip4k2b/Vps13c/Larp1/Sptlc2/Gsk3a/Bag3/Snx18/Gnai3/Ubqln4/Atp6v0a1/Usp36/Tigar
GO:0034504	protein localization to nucleus	-1.50124	0.000274803	0.0106176	Nol8/Nup133/Lats1/Nup98/Wrn/Jak2/Lats2/Stk3/Tmem201/Fam53c/Agap3/Ep300/Nup58/Cdkl5/Nmd3/Abca7/Atf2/Nf2/Nvl/Sun1/Kpna4/Nos3/Pinx1/Ipo7/Appl2/Tbk1/Ahr/Cse1l/Zc3h12a/Atp13a2/Bmal1/Rangap1/Sirt1/Morc3/Topors/Kpna2/Prickle1/Kat7/Fam53b/Prkaa1/Nup54/Ipo4/Mamdc4/Tcf7l2/Appl1/Tnpo3/Mavs/Ogt/Ddx56/Notch1/Mfhas1/Psen1/Fam76b/Tesk1/Mark3/Grk2/Trim8/Eif2ak3/Paf1/Mdm2/Xpo1/Tnpo2/Sesn2/Kpna1/Hnrnpu/Ints13/Pik3…
GO:0000245	spliceosomal complex assembly	-1.90498	0.000295429	0.0113368	Scaf11/Sfswap/Srsf6/Sf3b1/Srsf10/Gcfc2/Rbm5/Srsf1/Slu7/Gm23303/Rbmx/Usp39/Ddx42/Gm24924/Sf3a1/Ythdc1/Sf3a2/Rnu12/Crnkl1/Htatsf1/Celf1/Luc7l/Khdc4/Ncbp1/Prpf39
GO:0042149	cellular response to glucose starvation	-1.89815	0.000348537	0.0132844	Nfe2l2/Prkag1/Itfg2/Mtmr3/Hspa5/Becn1/Slc2a1/Pick1/Kics2/Suv39h1/Pik3r4/Plin2/Atg14/Prkag2/Pik3c3/Atf4/Chka/Zc3h12a/Sirt1/Prkaa1/Tbl2/Eif2ak3/Ywhag/Sesn2/Ifi207/Mybbp1a/Rrp8/Bcl2/Slc7a5/Nuak2
GO:0007059	chromosome segregation	1.47737	0.000353737	0.0133922	Ncaph/Cdk1/Ccne2/Pmf1/Mad2l1/Zwilch/Ccne1/Syce2/Spdl1/Cenpm/Ciao2b/Psrc1/Birc5/Aurkb/Cdca2/Bcl7a/Esco2/Spc24/Cenpf/Brca1/Kash5/Haus1/Nuf2/Nup37/Tpx2/Ndc80/Cit/Anapc11/Haus8/Dlgap5/Chek2/Cenpx/Cenpk/Sgo1/Cdc6/Tubb5/Bub1/Mki67/Diaph3/Ska2/Haus7/Oip5/Top2a/Kntc1/Spc25/Chmp5/Arid1a/Cdca8/Kif22/Nusap1/Cenpw/Klhdc8b/Tacc3/Rad18/Haspin/Rab11a/Mybl2/Aurka/Rad21/Rmi2/Ube2b/Uhrf1/Stil/Wrap73/Cenps/Ube2c/Ce…
GO:0060674	placenta blood vessel development	-1.98001	0.000361997	0.0136135	Plcd3/Ncoa6/Rbm15/Pkd1/Spint1/Fbxw8/Hs6st1/Akt1/Ccn1/Llgl2/Socs3/Vash1/Rbpj
GO:0045730	respiratory burst	1.9706	0.000383141	0.0143132	Slamf8/Trem2/Prdx2/Clec7a/Selenok/Cyba/Lipa/Rps19/Dusp10/Grn
GO:0036092	phosphatidylinositol-3-phosphate biosynthetic process	-2.04562	0.00038767	0.0143871	Pik3ca/Becn1/Inpp5e/Pik3r4/Atg14/Pik3c3/Fig4/Pik3cg/Pik3cd/Pik3c2a/Pik3cb/Atm/Uvrag/Pik3r1
GO:0110096	cellular response to aldehyde	2.01187	0.000400868	0.0147797	Hcn2/Akr1a1/Pnkd/Tgfb1/Park7/Aldh2/Esd/Sgk1/Aldh1a1/Hagh/Haghl/Adh5
GO:0032479	regulation of type I interferon production	-1.65501	0.000413421	0.0149494	Usp22/Atg9a/Polr3a/Tbk1/Steep1/Trim65/Tirap/Nploc4/Morc3/Ticam2/Kpna2/Traf6/Plcg2/Ppm1b/Mavs/Ddx56/Hspd1/Dhx33/Tlr7/G3bp1/Riok3/Nlrx1/Ddx41/Dhx36/Irak1/Tomm70a/Ctps1/Chuk/Qki/Arrdc4/Polr3d/Cul3/Gbp7/Myd88
GO:0032606	type I interferon production	-1.65501	0.000413421	0.0149494	Usp22/Atg9a/Polr3a/Tbk1/Steep1/Trim65/Tirap/Nploc4/Morc3/Ticam2/Kpna2/Traf6/Plcg2/Ppm1b/Mavs/Ddx56/Hspd1/Dhx33/Tlr7/G3bp1/Riok3/Nlrx1/Ddx41/Dhx36/Irak1/Tomm70a/Ctps1/Chuk/Qki/Arrdc4/Polr3d/Cul3/Gbp7/Myd88
GO:0022618	protein-RNA complex assembly	-1.62425	0.000408635	0.0149494	Yju2/Srsf6/Rpl24/Adar/Sf3b1/Eif4h/Gm25549/Srsf10/Eif3j2/Atr/Xrcc5/Prpf6/Gcfc2/Rbm5/Xab2/Sart3/Srsf1/Eif3c/Slu7/Eif3j1/Gm23303/Rbmx/Prpf18/Usp4/Nvl/Ago2/Eif3a/Shq1/Mdn1/Usp39/Mettl17/Ddx42/Gm24924/Sf3a1/Ythdc1/Sf3a2/Atm/Prmt5/Eif2s2/Dhx29/Dkc1/Prpf3/Rnu12/Crnkl1/Htatsf1/Eif5/Celf1/Luc7l/Gemin5/Wdr77/Gm23205/Khdc4/Mrto4/Ddx20/Rcc1l/Rrp7a/Ncbp1/Dhx30/Eif3b/Gm22378/Bop1/Prpf4b/Prmt7/Pwp2/Nopchap1/Nop…
GO:0051783	regulation of nuclear division	1.66729	0.000431701	0.015511	Cav2/Mad2l1/Ywhah/Zwilch/Spdl1/Pebp1/Rad51ap1/Birc5/Aurkb/Cdca2/Spc24/Igf1/Nuf2/Ndc80/Anapc11/Bub1/Mki67/Kntc1/Spc25/Cdca8/Nusap1/Edn3/Haspin/Rad21/Ube2b/Ube2c/Lcmt1/Cdc20/Cul7/Mad2l1bp/Plk1/Tubg1/Anapc7/Bub1b/Nsmce2/Ska1/Ccnb1/Pdgfb/Cdc42/Trip13/Nme6/Zwint/Ik
GO:0001510	RNA methylation	-1.83896	0.000438124	0.0156421	Nsun6/Nsun4/Trmt10a/Gtpbp3/Trmo/Nsun3/Trmt1l/Mto1/Trmt6/Mettl2/Rbm15b/Rbm15/Mrm3/Mettl6/Tfb2m/Zcchc4/Trmt44/Dimt1/Mettl1/Mettl16/Trmt13/Tarbp1/Trmt1/Spout1/Akt1/Nsun2/Nsun5/Mrm1/Trmt10c/Ftsj3/Nop2/Wdr4/Trmt61a
GO:0009299	mRNA transcription	-1.84897	0.000446866	0.0158539	Srebf1/Tfcp2/Flna/Tbp/Rara/Nfkbiz/Taf2/Ncbp3/Polr2a/Atf4/Atf2/Taf4b/Tbk1/Ncoa1/Taf5/Traf6/Ap3b1/Mavs/Hipk3/Zbtb1/Ncbp1/Atf1/Tomm70a/Rxra/Stat3/C5ar1
GO:0051236	establishment of RNA localization	-1.65917	0.000453351	0.0159245	Mettl14/Zc3h11a/Senp2/Rbm33/Sidt2/Poldip3/Peg10/Ahctf1/Ranbp2/Bicd2/Atr/Pom121/Alkbh5/Nup214/Nup188/Nup88/Tgfbr2/Hnrnpa2b1/Nrde2/Zfp36/Srsf1/Thoc5/Nup133/Mcm3ap/Nup98/Pabpn1/Rbm15b/Nxf1/Pnpt1/Casc3/Ddx19b/Nup58/Hsf1/Thoc1/Ddx39a/Ncbp3/Fxr2/Khsrp/Akap8l/Fyttd1/Ythdc1/Nup54/Cpsf6/Atm/Chtop/Nup160/Mettl1/Xpo5/Fmr1/G3bp2/Xpot/Xpo1/Iws1/Gle1/Zc3h3/Seh1l/Nup153/Nsun2/Ncbp1/Rftn1/Nol6/Qki
GO:0002753	cytoplasmic pattern recognition receptor signaling pathway	-1.58946	0.000454502	0.0159245	Tab1/Znrf1/Lats1/Hspa1b/Map3k20/Slc19a1/Itch/Nod1/Rela/Lats2/Cgas/Hspa1a/Nod2/Map3k7/Zdhhc18/Ddx39a/Trim11/Gpatch3/Ddx60/Pum1/Alpk1/Tnfaip3/Kcnk6/Tbk1/Ufl1/Ripk2/Steep1/Trim65/Tirap/Nploc4/Map2k3/Frk/Rnf185/Pik3ap1/Traf6/Xpnpep1/Plcg2/Zdhhc9/Mavs/Ogt/Ddx56/Dpp9/Cpt1a/Zdhhc5/Trim3/Ubqln1/Dhx33/Tlr7/Ifi207/Tlr13/Riok3/Aars2/Nlrx1/Lsm14a/Ddx41/Akt1/Dpp8/Rftn1/Hcfc2/Tnip2/Nlrp3/Myd88
GO:0006925	inflammatory cell apoptotic process	-1.97071	0.000488544	0.0162161	Nod2/Cxcr2/Itpkb/Pik3cd/Zmpste24/Ccr5/Sirt1/Pik3cb/Pten/Plekho2/Fcgr2b/Hcar2
GO:0002483	antigen processing and presentation of endogenous peptide antigen	1.95134	0.000475666	0.0162161	H2-K1/H2-M3/B2m/H2-T23/H2-Q4/H2-D1/H2-Q9/H2-Q7/H2-T22/Tapbp/Ulbp1
GO:0019885	antigen processing and presentation of endogenous peptide antigen via MHC class I	1.95134	0.000475666	0.0162161	H2-K1/H2-M3/B2m/H2-T23/H2-Q4/H2-D1/H2-Q9/H2-Q7/H2-T22/Tapbp/Ulbp1
GO:0061844	antimicrobial humoral immune response mediated by antimicrobial peptide	1.91747	0.00048568	0.0162161	Kng2/Ccl8/Rnase6/Cxcl10/Romo1/B2m/Rpl39/Rps19/Pomc/Fau/Cxcl14/Pf4/Ppbp/Lgals3/Fam3a/Rpl30/Tslp/Ang/Ccl4/Npy/Ccl9
GO:1901657	glycosyl compound metabolic process	1.90223	0.000480364	0.0162161	Tk1/Ak1/Cdk1/Gamt/Akr1a1/Akr1b1/Fuca1/Oard1/Dguok/Upp2/Dnph1/Enpp4/Adk/Dck/Hprt1/Akr1c13/Gla/Trmt12/Pnp2/Upb1/Lcmt2/Macrod1/Nudt1/Naga/Cbr4/Pemt/Dera/Nmrk1/Gba1/Qng1/Ahcy
GO:0000460	maturation of 5.8S rRNA	-1.90115	0.00047901	0.0162161	Rcl1/Rrp15/Pes1/Urb1/Mtrex/Exosc10/Nop9/Exosc2/Mak16/Rpp40/Wdr12/Bop1/Nol9/Kri1/Las1l/Ftsj3/Rrs1
GO:0035329	hippo signaling	-1.84712	0.000483173	0.0162161	Lats1/Strip1/Mob1a/Lats2/Stk3/Sav1/Strn4/Tead3/Nf2/Kpna4/Wtip/Map2k3/Sirt1/Frmd6/Aars1/Mark3/Arrdc3/Stk4/Prpf4b/Nuak2
GO:0016579	protein deubiquitination	-1.75111	0.000477651	0.0162161	Shmt2/Vcp/Atxn3/Usp48/Otud3/Cyld/Usp15/Otud7b/Otub2/Stambp/Usp8/Usp42/Usp1/Usp31/Spata2/Usp47/Kdf1/Otud5/Yod1/Usp45/Itch/Usp20/Bap1/Usp22/Usp4/Abraxas2/Tnfaip3/Usp19/Usp30/Vcpip1/Usp39/Zc3h12a/Usp33/Usp5/Usp46/Usp12/Usp16/Usp38/Trim21/Usp25/Otud6b/Usp10/Otud4/Usp27x/Usp7/Usp36
GO:0043414	macromolecule methylation	-1.74819	0.000488695	0.0162161	Nsun6/Ntmt1/Nsun4/Trmt10a/Gtpbp3/Trmo/Nsun3/Ehmt1/Trmt1l/Mto1/Trmt6/Mettl2/Rbm15b/Rbm15/Mrm3/Mettl6/Tfb2m/Kmt5a/Zcchc4/Trmt44/Prmt5/Dimt1/Mettl1/Mettl16/Trmt13/Tarbp1/Trmt1/Setd6/Fam98a/Spout1/Akt1/Nsun2/Nsun5/Mrm1/Trmt10c/Ftsj3/Nop2/Wdr4/Trmt61a
GO:0014061	regulation of norepinephrine secretion	1.99988	0.000498143	0.0162429	P2ry12/Ptger3/Adra2a/Crhr2/Kcnb1
GO:0002396	MHC protein complex assembly	1.98637	0.000496351	0.0162429	H2-DMa/B2m/H2-Aa/H2-Ab1/H2-DMb1/H2-Eb1/H2-Ob/Tapbp/H2-Oa
GO:0002501	peptide antigen assembly with MHC protein complex	1.98637	0.000496351	0.0162429	H2-DMa/B2m/H2-Aa/H2-Ab1/H2-DMb1/H2-Eb1/H2-Ob/Tapbp/H2-Oa
GO:0017145	stem cell division	-1.92511	0.000501167	0.0162476	Prdm15/Samd9l/Thoc5/Ncoa3/Hoxb4/Yme1l1/Fzd7/Notch1/Cntrl/Ext1/Etv5/Smyd5/Zfp36l2/Bmi1/Cul3/Fubp1/Gnl3
GO:0010660	regulation of muscle cell apoptotic process	-1.74922	0.000505282	0.0162874	Cxcr2/Hsf1/Rbm10/Atf4/Zc3h12a/Acot1/Sirt1/Arrb2/Pten/Notch1/Atg7/Grk2/Mfn2/Map3k5/Camk2d/Ptk2b/Pik3r1/Atp2a2/Stk4/Bag3/Smad4/Bcl2/Qki/Ptpn1/Tigar/Lifr/Slc7a5/Rbpj
GO:0032259	methylation	-1.59937	0.000511815	0.0164043	Mettl22/Setdb2/Cmtr1/Suv39h2/Nsun6/Prdm11/Ntmt1/Nsun4/Trmt10a/Gtpbp3/Trmo/Dnmt3b/Ash1l/Kmt2d/Mtap/Nsun3/Ehmt1/Suv39h1/Trmt1l/Mto1/Prdm15/Trmt6/Mettl2/Setdb1/Rbm15b/Rbm15/Mrm3/Mettl6/Mtr/Kmt5b/Mettl4/Tfb2m/Kmt5a/Zcchc4/Trmt44/Prdm4/Prmt5/Cmtr2/Dimt1/Mettl1/Mettl16/Trmt13/Prmt9/Tarbp1/Trmt1/Dph5/Icmt/Setd6/Fam98a/Smyd5/Spout1/Akt1/Nsun2/Nsun5/Mrm1/Nsd3/Trmt2a/Rrp8/Prmt7/Trmt10c/Mettl13/Prmt3/Carm1/…
GO:0045089	positive regulation of innate immune response	-1.4357	0.000524007	0.0167001	Tab1/Nfkbiz/Znrf1/Tlr1/Lats1/Hspa1b/Map3k20/Sfpq/Slc19a1/Itch/Nod1/Ap1g1/Rela/Arf6/Lats2/Cgas/Hspa1a/Nod2/Map3k7/Zdhhc18/Lyn/Ddx39a/Trim11/Gpatch3/Ddx60/Pum1/Pik3c3/Alpk1/Tnfaip3/Kcnk6/Appl2/Tbk1/Ufl1/Ripk2/Steep1/Trim65/Tirap/Nploc4/Lrrfip2/Map2k3/Frk/Rnf185/Arrb2/Ticam2/Cd300lf/Pik3ap1/Traf6/Ccdc134/Vav1/Xpnpep1/Plcg2/Zdhhc9/Ap3b1/Appl1/Mavs/Ogt/Gdi1/Matr3/Irak4/Ddx56/Mfhas1/Dpp9/Mapkapk2/Hspd1…
GO:0000183	rDNA heterochromatin formation	-2.04159	0.000534008	0.0169232	Suv39h1/Baz2a/Bend3/Smarca5/Ubtf/Sirt1/Phf8/Phf2/Rrp8
GO:0007127	meiosis I	1.78938	0.000550924	0.0173618	Ccne2/Ccne1/Syce2/Rad51ap1/Birc5/Rad51/Kash5/Ndc80/Cks2/Cenpx/Cdc25b/Rad51c/Top2a/Haspin/Rad54l/Aurka/Ube2b/Cenps/Slc2a8/Brca2/Msh5/Cntd1/Plk1/Brme1/Brip1/Tex12/Rad54b/M1ap/Iho1/Pttg1/Fancm/Fancd2/Rmi1/Hsf2bp/Trip13/Terf1/Zwint/Ccnb2/Ubb
GO:0001825	blastocyst formation	-1.88586	0.000582208	0.0182458	Lats1/Kdm4c/Lats2/Skil/Ctr9/Pbrm1/Txnrd3/Bysl/Gabpa/Cnot3/Matr3/Mfn2/Sp3/Rrp7a/Furin/Uspl1/Nle1/Cul3/Nop2
GO:0010657	muscle cell apoptotic process	-1.72249	0.000597207	0.0186124	Il12a/Ambra1/Hmox1/Nupr1/Apaf1/Jak2/Cxcr2/Hsf1/Rbm10/Atf4/Zc3h12a/Acot1/Sirt1/Arrb2/Pten/Map2k4/Notch1/Atg7/Grk2/Mfn2/Map3k5/Camk2d/Ptk2b/Pik3r1/Atp2a2/Stk4/Bag3/Smad4/Bcl2/Qki/Ptpn1/Tigar/Lifr/Slc7a5/Rbpj
GO:0006749	glutathione metabolic process	1.85489	0.000603139	0.0186153	Gstm5/Sod1/Gstm4/Gstp1/Gstk1/Arl6ip5/Gsto2/Cryab/Slc1a2/Gstt1/Gstm7/Ndp/Gstm1/Snca/Gstt3/Hpgds/Chac2/Aaas/Gstm6/Ethe1/Gpx1/Hagh/Gstz1/Gclm/Hmgn5/Ggt1
GO:0010906	regulation of glucose metabolic process	-1.74305	0.000607069	0.0186153	Foxk2/Sik1/Acacb/Dyrk2/Oprm1/Hif1a/Pdk4/Wdr5/Akt2/Fbp1/Ep300/Prkag2/Ppp4r3a/Slc35b4/Ppp4r3b/Supt20/Sorbs1/Dgkq/Zmpste24/Slc25a12/Mtcl2/Sirt1/Nfe2l1/Ddb1/Ppara/Tcf7l2/Ogt/Clk2/Sesn2/Xpc/Akt1/Ppp1r3b/Zfp692/Irs2/Kat2a/Usp7/Tigar
GO:0048638	regulation of developmental growth	-1.49141	0.0006072	0.0186153	Itsn2/Zfp418/Dlg1/Vgll4/Wwc2/Cdkl3/Plcb1/Ikzf1/Spart/Tgfbr2/Crabp2/Ghr/Cpne9/Smad7/Acacb/Mecp2/Pls1/Suv39h1/Actr3/Fto/Sgpl1/Lats1/Ezr/Map3k13/Lats2/Stk3/Sav1/Golga4/Lrp1/Gpat4/Ep300/Rab21/Rnf6/Hsf1/Rbm10/Cdkl5/Hdac6/Fdps/Dbn1/Atrn/Ahr/Disc1/Zmpste24/Ccr5/Sirt1/Ifrd1/Gpam/Ulk2/Limk1/Rnf157/Pten/Ppara/Tcf7l2/Gdi1/Tnks2/Notch1/Atg7/Ndel1/Ctdp1/Stat5b/Col14a1/Ryk/Rps6kb1/Dnm2/Celf1/Daxx/Sgip1/Zfyve27…
GO:0033046	negative regulation of sister chromatid segregation	1.86173	0.00062309	0.018696	Mad2l1/Zwilch/Spdl1/Birc5/Aurkb/Spc24/Nuf2/Ndc80/Bub1/Kntc1/Spc25/Cdca8/Haspin/Rad21/Lcmt1/Cdc20/Mad2l1bp/Plk1/Bub1b/Ska1/Ccnb1/Trip13/Zwint/Ik/Ska3
GO:0033048	negative regulation of mitotic sister chromatid segregation	1.86173	0.00062309	0.018696	Mad2l1/Zwilch/Spdl1/Birc5/Aurkb/Spc24/Nuf2/Ndc80/Bub1/Kntc1/Spc25/Cdca8/Haspin/Rad21/Lcmt1/Cdc20/Mad2l1bp/Plk1/Bub1b/Ska1/Ccnb1/Trip13/Zwint/Ik/Ska3
GO:0045841	negative regulation of mitotic metaphase/anaphase transition	1.86173	0.00062309	0.018696	Mad2l1/Zwilch/Spdl1/Birc5/Aurkb/Spc24/Nuf2/Ndc80/Bub1/Kntc1/Spc25/Cdca8/Haspin/Rad21/Lcmt1/Cdc20/Mad2l1bp/Plk1/Bub1b/Ska1/Ccnb1/Trip13/Zwint/Ik/Ska3
GO:2000816	negative regulation of mitotic sister chromatid separation	1.86173	0.00062309	0.018696	Mad2l1/Zwilch/Spdl1/Birc5/Aurkb/Spc24/Nuf2/Ndc80/Bub1/Kntc1/Spc25/Cdca8/Haspin/Rad21/Lcmt1/Cdc20/Mad2l1bp/Plk1/Bub1b/Ska1/Ccnb1/Trip13/Zwint/Ik/Ska3
GO:0098727	maintenance of cell number	-1.58167	0.000628973	0.0187727	Bicral/Sav1/Smarca4/Kdm3a/Kdm2b/Ss18/Ncoa3/Tead3/Arid4b/Dis3l2/Srrt/Ctr9/Leo1/Med12/Dpf2/Yme1l1/Braf/Brd9/Cdc73/Cnot3/Smarcd1/Cul4a/Fzd7/Wdr47/Myc/Tcf7l2/Taf5l/Ogt/Notch1/Klf10/Mcph1/Ski/Zc3h13/Trim8/Paf1/Phf10/Raf1/Med15/Setd6/Piwil2/Eif4enif1/Zfp36l2/Kat2a/Sinhcaf/Stat3/Wdr43/Gnl3/Rbpj
GO:0008298	intracellular mRNA localization	-2.02865	0.000653816	0.0194114	Hnrnpab/Zfp36/Stau2/Stau1/Casc3/Caprin1/Ppp1r21/Mettl1/Fubp3/Dhx36/Qki
GO:0070935	3'-UTR-mediated mRNA stabilization	-2.02342	0.000678613	0.0197934	Zfp36/Jak2/Tent4a/Rbm10/Tirap/Mapkapk2/Mettl16/Larp4b/Rbm47/Tent4b/Qki/Stat3/Arid5a/Myd88
GO:0009072	aromatic amino acid metabolic process	1.95915	0.00067294	0.0197934	Afmid/Haao/Pcbd1/Pcbd2/Qprt/Qdpr/Park7/Fah/Cyp2d22/Thap4/Kmo/Gstz1
GO:0045064	T-helper 2 cell differentiation	-1.92409	0.000684225	0.0197934	Batf/Socs5/Zfp35/Bcl6/Bcl3/Nlrp3/Il4ra
GO:0000027	ribosomal large subunit assembly	-1.9228	0.000684225	0.0197934	Mdn1/Mrto4/Rcc1l/Dhx30/Bop1/Nop2/Rrs1
GO:0002244	hematopoietic progenitor cell differentiation	-1.63359	0.000680736	0.0197934	Zfp36/Rara/Samd9l/Slc7a6os/Srsf4/Lmbr1l/Zbtb24/Acp6/Armc6/Hoxb4/Kdr/Ercc2/Chd2/Lyn/Wdr7/Atf2/Dpf2/Braf/Ufl1/Ppp4r2/Cebpd/Ptprc/Sh2b3/Ap2a2/Batf/Ap3b1/Cdk6/Notch1/Psen1/Ext1/Zbtb1/Slc37a4/Plek/Sp3/Rbm47/Gpatch4/Apobec3/Dhx36/Sos2/Bcl2/Hspa9/Pus7/Rrs1/Runx1
GO:0071466	cellular response to xenobiotic stimulus	1.68179	0.000700892	0.0201721	Slamf8/Bphl/Gstm5/Pcna/As3mt/Pon3/Gstm4/Vkorc1/Cbr1/Aip/Gstp1/Trp53/Chek2/Sox10/E2f1/Gsto2/Rbbp9/Gstt1/Gstm7/Aldh2/Ppp1r12a/Mcm7/Gstm1/Cyp2j12/Acaa1a/Cyp2j6/Akr1c13/Cyp2e1/Ppp1r14a/Rora/Cyp2d22
GO:0031124	mRNA 3'-end processing	-1.85672	0.000742692	0.0212666	Angel2/Rprd1a/Cstf3/Rprd1b/Cstf1/Cpsf4l/Cstf2t/Papola/Cpsf7/Pabpn1/Leo1/Fip1l1/Ahcyl1/Cdc73/Ythdc1/Cpsf6/Cstf2/Cpsf2/Paf1/Zcchc8/Zc3h3/Tut1/Ncbp1/Tent4b/Dhx36
GO:0035330	regulation of hippo signaling	-1.8432	0.000754896	0.0215069	Lats1/Strip1/Lats2/Stk3/Sav1/Strn4/Nf2/Kpna4/Wtip/Map2k3/Sirt1/Frmd6/Aars1/Mark3/Arrdc3/Stk4/Prpf4b/Nuak2
GO:1905818	regulation of chromosome separation	1.78467	0.000762854	0.0216244	Ncaph/Mad2l1/Zwilch/Spdl1/Birc5/Aurkb/Spc24/Nuf2/Ndc80/Anapc11/Bub1/Kntc1/Spc25/Cdca8/Haspin/Rad21/Ube2c/Lcmt1/Cdc20/Mad2l1bp/Smc2/Plk1/Ncapg/Anapc7/Bub1b/Nsmce2/Ska1/Ccnb1/Trip13/Ncapg2/Zwint/Ik/Ska3/Smc4/Ncaph2/Bub3/Ncapd2
GO:0034311	diol metabolic process	1.92025	0.000778481	0.0219571	Plpp1/Pcbd1/Plpp2/Plpp3/Dhfr/Pcbd2/Sptssa/Asah2/Qdpr/Degs2/Ephx1/Naaa
GO:0045638	negative regulation of myeloid cell differentiation	-1.76277	0.000791168	0.0222039	Zfp36/Rara/Thoc5/Tob2/Rbm15/Gpr171/Lyn/Inpp5d/Ctr9/Leo1/Klf13/Itpkb/Trib1/Gabpa/Cdc73/Cul4a/Myc/Cdk6/Stat5b/Paf1/Ptk2b/Pik3r1/Mafb/Hspa9/Zfpm1/Qki/Meis1/Runx1
GO:0032868	response to insulin	-1.51174	0.000810788	0.0226419	Eif4ebp1/Mapkap1/Scap/Sos1/Pip4k2a/Pik3r2/Gclc/Rab31/Rbm4/Enpp1/Srsf6/Cry1/Plcb1/Egr1/Slc2a1/Srebf1/Ucp2/Rps6kb2/Rb1/Pde3b/Cry2/C2cd5/Ide/Pdk4/Kbtbd2/Agrp/Lonp1/Rela/Ncoa5/Pln/Akt2/Zbtb7b/Jun/Fbp1/Opa1/Lyn/Prkcb/Tnfrsf11a/Sort1/Sorbs1/Zdhhc7/Appl2/Pip4k2c/Ncoa1/Mtcl2/Prkci/Tsc1/Sirt1/Cad/Shc1/Gpam/Prkaa1/Fbxw8/Pten/Ppara/Appl1/Rab10/Ogt/Esrra/Zfp592/Ndel1/Grk2/Rps6kb1/Scly/Mfn2/Uso1/Sorl1/Ncl/Ywh…
GO:0051224	negative regulation of protein transport	1.68585	0.000816129	0.0226787	Adtrp/Pkig/Pde8b/Ptger3/Anxa5/Txn1/Ndufaf2/Adra2a/Rsad2/Erp29/Crhr2/Lyplal1/Ifnb1/Kcnb1/Sumo1/Snx3/Park7/Erlec1/Aldh7a1/Ptpn11/Bard1/Gnaz/Cyp51/Pkia/Fkbp1b/Mdfic/Ndfip1/Cd36/Hadh/Derl2/Idh2/Ubac2/Il12b/Ptpmt1/Sirt4
GO:0006094	gluconeogenesis	-1.74392	0.000830925	0.0229767	Pcx/Sik1/Gpt2/Oprm1/Hif1a/Wdr5/Pfkfb4/Fbp1/Ep300/Prkag2/Ppp4r3a/Slc35b4/Ppp4r3b/Supt20/Atf4/Dgkq/Crtc2/Mtcl2/Sirt1/Ddb1/Ppara/Tcf7l2/Ogt/Clk2/Slc37a4/Sesn2/Xpc/Akt1/Gpd1/Zfp692/Kat2a/Usp7/Slc39a14
GO:0019883	antigen processing and presentation of endogenous antigen	1.91819	0.000860032	0.0235507	H2-K1/H2-M3/B2m/H2-T23/H2-Q4/H2-D1/H2-Q9/H2-Q7/H2-T22/Tapbp/Ulbp1
GO:0010965	regulation of mitotic sister chromatid separation	1.79263	0.000857506	0.0235507	Mad2l1/Zwilch/Spdl1/Birc5/Aurkb/Spc24/Nuf2/Ndc80/Anapc11/Bub1/Kntc1/Spc25/Cdca8/Haspin/Rad21/Ube2c/Lcmt1/Cdc20/Mad2l1bp/Plk1/Anapc7/Bub1b/Nsmce2/Ska1/Ccnb1/Trip13/Zwint/Ik/Ska3
GO:0002476	antigen processing and presentation of endogenous peptide antigen via MHC class Ib	1.95514	0.000895061	0.024043	H2-K1/H2-M3/H2-T23/H2-Q4/H2-D1/H2-Q9/H2-Q7/H2-T22/Ulbp1
GO:0002484	antigen processing and presentation of endogenous peptide antigen via MHC class I via ER pathway	1.95514	0.000895061	0.024043	H2-K1/H2-M3/H2-T23/H2-Q4/H2-D1/H2-Q9/H2-Q7/H2-T22/Ulbp1
GO:0002486	antigen processing and presentation of endogenous peptide antigen via MHC class I via ER pathway, TAP-independent	1.94959	0.000888575	0.024043	H2-K1/H2-M3/H2-T23/H2-Q4/H2-D1/H2-Q9/H2-Q7/H2-T22/Ulbp1
GO:0045814	negative regulation of gene expression, epigenetic	-1.5763	0.000882678	0.024043	Epc1/Kdm5a/Lmnb2/Pcgf3/Smarca2/Dnmt3b/Lbr/Kmt2d/Rlim/Mecp2/Rb1/Ehmt1/Nrde2/Ctcf/Suv39h1/Suz12/Zfp445/Baz2a/Bend3/Setdb1/Hnrnpk/Smarcad1/Smarca4/Rbm15b/Bap1/Rbm15/Arb2a/Fkbp6/Upf1/Ctr9/Hdac6/Smarca5/Baz1a/Uty/Exosc10/Tnrc18/Mettl4/Ubtf/Spty2d1/Sirt1/Pphln1/Tasor2/Phf8/Mbd1/Ythdc1/Phf2/Firre/Rlf/Myc/Prmt5/Cdyl/Crebzf/Morc2a/Ifi207/Hnrnpu/Smyd5/Piwil2/Mbd2/Ciz1/Ppm1d/Rrp8/Bcl6/Usp7/Bmi1/Hdac4/Mta1
GO:0006986	response to unfolded protein	-1.66837	0.000944327	0.0252462	Nfe2l2/Upf2/Cul5/Ccnd1/Epg5/Ubxn4/Tm7sf3/Hspa5/Ern1/Dnajc10/Parp6/Thbs1/Wfs1/Nck2/Ficd/Ero1a/Eif2ak4/Ermp1/Hsph1/Yod1/Stt3b/Akt2/Hspa1a/Faf2/Hsf1/Gorasp2/Dnajc3/Abca7/Atf4/Atf6b/Dnajb5/Creb3l4/Ufl1/Parp8/Qrich1/Sirt1/Edem3/Comp/Syvn1/Abcb10/Hspd1/Mfn2/Tbl2/Eif2ak3/Erp27/Daxx/Chac1/Atf6/Pik3r1/Akt1/Bag3/Rhbdd1/Ptpn1/Atad3a/Serp1
GO:0033029	regulation of neutrophil apoptotic process	-1.99551	0.000993144	0.0264261	Cxcr2/Itpkb/Pik3cd/Pik3cb/Fcgr2b/Hcar2
GO:1990700	nucleolar chromatin organization	-2.02555	0.00103317	0.027362	Suv39h1/Baz2a/Bend3/Smarca5/Ubtf/Sirt1/Phf8/Phf2/Rrp8
GO:0015931	nucleobase-containing compound transport	-1.52368	0.00108747	0.0285321	Wnk1/Thoc2l/Thoc2/Rae1/Nup107/Slc25a36/Abcc4/Slc25a42/Ndc1/P2rx7/Slc35a5/Abcc1/Slc25a24/Pcid2/Fxr1/Ddx19a/Dhx9/Abcc5/Tnks/Slc25a25/Epg5/Mettl14/Zc3h11a/Senp2/Rbm33/Sidt2/Shoc2/Poldip3/Peg10/Ahctf1/Ranbp2/Bicd2/Slc35e3/Pom121/Alkbh5/Nup214/Nup188/Nup88/Tgfbr2/Hnrnpa2b1/Nrde2/Slc29a3/Zfp36/Srsf1/Thoc5/Nup133/Mcm3ap/Nup98/Slc19a1/Slc35c1/Pabpn1/Rbm15b/Nxf1/Pnpt1/Casc3/Ddx19b/Nup58/Hsf1/Thoc1/Ddx39a/…
GO:0000209	protein polyubiquitination	-1.46285	0.00108702	0.0285321	Arel1/Marchf7/Rnf126/Rnf31/Fbxl17/Trim2/Fbxo45/Wwp2/Cep63/Fbxo22/Dtx4/Ube3d/Ube4a/Ambra1/Rnf20/G2e3/Pex12/Rnf41/Birc3/Keap1/Ddb2/Znrf1/Kbtbd2/Ube3a/Itch/Foxf2/Rbck1/Rnf111/Nod2/Rnf6/Ube2o/Huwe1/Rnf123/Hdac6/Birc2/Marchf8/Tnfaip3/Ube2q1/Kbtbd7/Ripk2/Trim65/Axin1/Rnf185/Topors/Mdc1/Wdr24/Traf6/Nfe2l1/Ikbkb/Rnf4/Fbxo38/Prkaa1/Fbxw11/Nhlrc3/Chfr/Klhl42/Syvn1/Atm/Ube2v2/Usp38/Ube3c/Trim26/Tnks2/Nt5c2/…
GO:0045912	negative regulation of carbohydrate metabolic process	-1.7796	0.00109454	0.0285847	Nupr1/Ap2a1/Fbp1/Ep300/Gfpt1/Slc25a12/Mtcl2/Ppara/Ddit4/Tcf7l2/Clk2/Plek/Xpc/Ppp1r3b/Kat2a/Usp7/Hdac4/Tigar/Stat3/Git1
GO:0009410	response to xenobiotic stimulus	1.47296	0.00113555	0.0295191	Slamf8/Oxct1/Hcn2/Mmp2/Trp53i13/Bphl/Gstm5/Sod1/Gnas/Pcna/As3mt/Ggh/Gria1/Fabp3/Pon3/Gstm4/Rad51/Vkorc1/Mdk/Cbr1/Aip/Lox/Gstp1/Trp53/Fzd1/Chek2/Sox10/E2f1/Gsto2/Alas1/Npc1/Cyba/Car9/Lipa/Rbbp9/Cat/Tgfb1/Slc1a2/Gstt1/Gstm7/Rogdi/Rad54l/Aldh2/Cst3/Ppp1r12a/Ube2b/Cdk4/Alad/Mcm7/Gstm1/Casp3/Cyp2j12/Acaa1a/Snca/Cyp2j6/Akr1c13/Cyp2e1/Smpd1/Ppp1r14a/Uqcrfs1/Rora/Aldh1a1/Cyp2d22/Vegfc/Rad54b/Uqcrc2/Scn11…
GO:0051607	defense response to virus	-1.45721	0.00120706	0.031234	Trim11/Ncbp3/Fv1/Ddx60/Bcl2l1/Smarca5/Stat2/Trim35/Tbk1/Ufl1/Zc3h12a/Trim65/Zmpste24/Ptprc/Ifngr1/Rnf185/Morc3/Ticam2/Traf6/Gpam/Ercc6/Abcc9/Unc13d/Pde12/Serinc5/Usp38/Ppara/Ddit4/Trim26/Ppm1b/Mavs/Nt5c2/Trim21/Ddx56/Atg7/Arih2/Abcf3/Trim8/Dhx16/Tagap/Tlr7/Otud4/Ifi207/G3bp1/Riok3/Card9/Atg16l1/Lsm14a/Ddx41/Trim44/Polr3e/Ncbp1/Dhx15/Hcfc2/Apobec3/Usp27x/Dhx36/Gpr146/Tomm70a/Bcl2/Ddx21/Chuk/Polr3d…
GO:0051304	chromosome separation	1.72464	0.00121883	0.0313945	Ncaph/Mad2l1/Zwilch/Spdl1/Birc5/Aurkb/Spc24/Nuf2/Ndc80/Anapc11/Bub1/Top2a/Kntc1/Spc25/Cdca8/Haspin/Rad21/Ube2c/Lcmt1/Cdc20/Mad2l1bp/Smc2/Plk1/Ncapg/Anapc7/M1ap/Bub1b/Nsmce2/Ska1/Ccnb1/Trip13/Ncapg2/Zwint/Ik/Ska3/Smc4/Ncaph2/Bub3/Ncapd2
GO:0016237	microautophagy	-1.89614	0.00123864	0.0317599	Rb1cc1/Zfp418/Hspa8/Atg2b/Vps4b/Atg4d/Atg9a/Ulk2/Atg2a/Atg7/Ulk3/Vps4a/Atg16l1
GO:0006940	regulation of smooth muscle contraction	1.80558	0.00125233	0.0319657	Npnt/Kcnma1/Sod1/Ptafr/Rgs2/Flt1/Cav1/Ptger3/Adra2a/Atp1a2/Edn3
GO:0001914	regulation of T cell mediated cytotoxicity	1.83433	0.00128546	0.0326635	Il7r/H2-K1/H2-M3/B2m/H2-T23/H2-Q4/H2-D1/H2-Q9/H2-Q7/H2-T22/Ulbp1/Ceacam1/Klrd1/H2-Q6/Fadd/Il12b/Ripk3
GO:0035966	response to topologically incorrect protein	-1.58546	0.00131454	0.0332526	Nfe2l2/Upf2/Cul5/Ccnd1/Epg5/Ubxn4/Vcp/Atxn3/Tm7sf3/Hspa5/Ern1/Dnajc10/Parp6/Thbs1/Rnf126/Wfs1/Nck2/Ficd/Ero1a/Eif2ak4/Rara/Ermp1/Hsph1/Yod1/Stt3b/Akt2/Hspa1a/Faf2/Ncoa3/Hsf1/Gorasp2/Dnajc3/Hdac6/Abca7/Atf4/Atf6b/Dnajb5/Creb3l4/Ufl1/Parp8/Qrich1/Sirt1/Edem3/Comp/Syvn1/Abcb10/Hspd1/Mfn2/Tbl2/Eif2ak3/Erp27/Daxx/Chac1/Atf6/Pik3r1/Akt1/Bag3/Rxra/Rhbdd1/Ptpn1/Cul3/Atad3a/Serp1
GO:0002181	cytoplasmic translation	1.54894	0.00134075	0.0337641	Rps29/Lamtor1/Rpl41/Rps12/Rpl37a/Rpl38/Rpl35/Rplp1/Rplp2/Rps17/Rpl36/Rps26/Rpl35rt/Rnh1/Rpl39/Ftsj1/Rps21/Rpl32/Rpl31/Rps19/Rps14/Rpl37rt/Rpl37/Rpl35a/Rpl36a/Rpl26/Rps13/Rps15a/Rpl27a/Rpl28/Fau/Rpl18a/Rps23/Rps3/Rps11/Rps15/Slbp/Rpl7/Eif3f/Rps25/Rps18/Rps20/Rpl15/Rps16/Rpl10/Rpl19/Rps5/Ncbp2/Eif2d/Hhex/Rpl11/Rps28/Rpl13/Rps4x/Pabpc1/Rpl29/Rps24/Rpl23/Rpl9/Eif3h/Rpl9-ps6/Rpl30/Rps27a/Mcts1/Rpl22/A…
GO:1905868	regulation of 3'-UTR-mediated mRNA stabilization	-1.97342	0.0013742	0.0340541	Zfp36/Jak2/Tent4a/Mettl16/Larp4b/Tent4b/Qki/Stat3/Arid5a
GO:0046365	monosaccharide catabolic process	1.80777	0.00136324	0.0340541	Glb1/Eno3/Trp53/Khk/Src/Glb1l2/Mpi/Tpi1/Bad/Aldoa/Pgk1/Hk2/Aldh1a1/Pgam1/Rbks/Eno2/Galk1/Pgm1/Eno1/Galt/Tkfc
GO:0030488	tRNA methylation	-1.77781	0.00136884	0.0340541	Nsun6/Nsun4/Trmt10a/Gtpbp3/Trmo/Nsun3/Trmt1l/Mto1/Trmt6/Mettl2/Mettl6/Trmt44/Mettl1/Trmt13/Tarbp1/Trmt1/Akt1/Nsun2/Trmt10c/Wdr4/Trmt61a
GO:0048024	regulation of mRNA splicing, via spliceosome	-1.65947	0.00137641	0.0340541	Thrap3/Rbm4/Srsf6/Arglu1/Srsf10/Hspa8/Rbm5/Ddx43/Hnrnpa2b1/Srsf1/Hnrnpk/Nup98/Srsf4/Dazap1/Rbm15b/Rbm15/Arb2a/Rbm10/Upf1/Rbmx/Srrm1/Rbm25/Exosc10/Ptbp1/Obi1/Ythdc1/Prmt5/Mettl16/Rbm39/Fmr1/Celf1/Snw1/Ncl/Wdr77/Srsf5/Hnrnpu/Rbm47/Snrnp70/Ncbp1/Jmjd6/Qki/Khdrbs3
GO:0010269	response to selenium ion	1.97431	0.00138935	0.0340752	Selenop/Selenom/Retnla/Gstt1/Alad/Selenow/Hpgds/Gpx1
GO:0048863	stem cell differentiation	-1.49763	0.00138587	0.0340752	Zfp36/Otud5/Hif1a/A2m/Kdm4c/Gak/Lmbr1l/Smad1/Kdm3a/Ncoa3/Hoxb4/Arb2a/Ercc2/Chd2/Klhl12/Pum1/L3mbtl2/Ufl1/Ptprc/Phactr4/Sh2b3/Ap2a2/Prickle1/Nr6a1/Batf/Prdm4/Zeb2/Nrp2/Cdk6/Smad5/Notch1/Tcof1/Ext1/Pwp1/Gatad2a/Hnrnpu/Setd6/Mta2/Bbs12/Smyd5/Nsun2/Kbtbd8/Zfp36l2/Zfp281/Dhx36/Smad4/Coro1c/Bcl2/Hspa9/Pus7/Sema6b/Ankrd11/Stat3/Mta1/Nolc1/Rbpj
GO:0046488	phosphatidylinositol metabolic process	-1.60491	0.00145292	0.0354803	Pigw/Tnfaip8l3/Pi4k2b/Pigv/Ip6k1/Lclat1/Mtm1/Pik3ca/Pigl/Mtmr2/Mtmr3/Synj1/Pip4k2a/Becn1/Itpkc/Plcb3/Mtmr1/Plcb1/Mtmr4/Mtmr9/Inpp5e/Vac14/Plcg1/Pip5k1c/Pi4kb/Synj2/Pik3r4/Pgap3/Pi4ka/Sacm1l/Atg14/Mtmr6/Ttc7b/Bpnt1/Pigb/Inpp5d/Dpm1/Pign/Pigs/Pik3c3/Fig4/Itpkb/Pik3cg/Pik3cd/Pip4k2c/Lpgat1/Pik3r5/Pik3c2a/Inpp5b/Piga/Pik3cb/Plcg2/Atm/Pten/Uvrag/Ube3c/Inpp5f/Ddhd1/Slc30a5/Pip4k2b/Ipmk/Pik3r1/Hycc1/Pi4…
GO:0000280	nuclear division	1.40678	0.00146266	0.035564	Ncaph/Cdk1/Cav2/Ccne2/Mad2l1/Ywhah/Zwilch/Ccne1/Syce2/Spdl1/Pebp1/Psrc1/Rad51ap1/Birc5/Aurkb/Cdca2/Spc24/Rad51/Kash5/Igf1/Nuf2/Tpx2/Ndc80/Cit/Anapc11/Cks2/Chek2/Cenpx/Cenpk/Sgo1/Bub1/Mki67/Ska2/Cdc25b/Cdkn1c/Rad51c/Top2a/Kntc1/Spc25/Chmp5/Tgfb1/Cdca8/Kif22/Nusap1/Edn3/Klhdc8b/Haspin/Rab11a/Rad54l/Mybl2/Aurka/Rad21/Ube2b/Uhrf1/Wrap73/Ube2s/Cenps/Ube2c/Slc2a8/Lcmt1/Cdc20/Cul7/Nek2/Nsl1/Prc1/Brca2/M…
GO:0010507	negative regulation of autophagy	-1.66068	0.00149753	0.0362555	Adra1a/Cul1/Rragc/Itgb1/Becn1/Syk/Mtmr9/Zkscan3/Rubcn/Foxk2/Hmox1/Mlst8/Rnf41/Nupr1/Poldip2/Bmf/Ep300/Itga5/Hdac6/Tnfaip3/Usp30/Fbxl4/Tsc1/Stk38l/Ikbkb/Eif4g1/Pptc7/Rps6kb1/Vps13c/Akt1/Eif4g2/Snrnp70/Ptk2/Ubqln4/Usp7/Bcl2/Tbc1d14/Usp36/Chuk/Tigar/Stat3/Slc7a5/Mcl1
GO:0045913	positive regulation of carbohydrate metabolic process	-1.63081	0.00151677	0.0365646	Dyrk2/Mlst8/Oprm1/Hif1a/Wdr5/Akt2/Prkag2/Ppp4r3a/Ppp4r3b/Supt20/Sorbs1/Slc25a12/Sirt1/Arnt/Prkaa1/Myc/Ddb1/Ppara/Tcf7l2/Psen1/Mlxipl/Akt1/Ppp1r3b/Gpd1/App/Irs2/Kat2a/Cd244a
GO:0140895	cell surface toll-like receptor signaling pathway	-1.67057	0.00153168	0.0367669	Znrf1/Tlr1/Rela/Arf6/Nod2/Map3k7/Lyn/Tnfaip3/Appl2/Tbk1/Ripk2/Tirap/Lrrfip2/Ticam2/Pik3ap1/Traf6/Appl1/Gdi1/Irak4/Mfhas1/Pik3r1/Akt1/Irak1/Tnip2/Chuk/Ecsit/Myd88
GO:0060263	regulation of respiratory burst	1.88624	0.00156386	0.0371264	Slamf8/Clec7a/Rps19/Dusp10/Grn
GO:0048015	phosphatidylinositol-mediated signaling	-1.85672	0.00159931	0.0371264	Pik3ca/Synj1/Plcb3/Plcb1/Plcg1/Pi4kb/Pi4ka/Pik3c3/Pik3cg/Pik3cd/Pik3c2a/Pik3cb/Plcg2
GO:0051953	negative regulation of amine transport	1.84303	0.00155514	0.0371264	P2ry12/Rgs2/Ptger3/Adra2a/Arl6ip5/Crhr2/Gabbr1/Snca/Slc43a1
GO:0007094	mitotic spindle assembly checkpoint signaling	1.83171	0.00158859	0.0371264	Mad2l1/Zwilch/Spdl1/Birc5/Aurkb/Spc24/Nuf2/Ndc80/Bub1/Kntc1/Spc25/Cdca8/Haspin/Lcmt1/Cdc20/Mad2l1bp/Plk1/Bub1b/Ska1/Ccnb1/Trip13/Zwint/Ik/Ska3
GO:0071173	spindle assembly checkpoint signaling	1.83171	0.00158859	0.0371264	Mad2l1/Zwilch/Spdl1/Birc5/Aurkb/Spc24/Nuf2/Ndc80/Bub1/Kntc1/Spc25/Cdca8/Haspin/Lcmt1/Cdc20/Mad2l1bp/Plk1/Bub1b/Ska1/Ccnb1/Trip13/Zwint/Ik/Ska3
GO:0071174	mitotic spindle checkpoint signaling	1.83171	0.00158859	0.0371264	Mad2l1/Zwilch/Spdl1/Birc5/Aurkb/Spc24/Nuf2/Ndc80/Bub1/Kntc1/Spc25/Cdca8/Haspin/Lcmt1/Cdc20/Mad2l1bp/Plk1/Bub1b/Ska1/Ccnb1/Trip13/Zwint/Ik/Ska3
GO:0019320	hexose catabolic process	1.79927	0.00158646	0.0371264	Glb1/Eno3/Trp53/Khk/Src/Glb1l2/Mpi/Tpi1/Bad/Aldoa/Pgk1/Hk2/Aldh1a1/Pgam1/Eno2/Galk1/Pgm1/Eno1/Galt/Tkfc
GO:0062207	regulation of pattern recognition receptor signaling pathway	-1.54789	0.00159799	0.0371264	Tab1/Znrf1/Tlr1/Lats1/Hspa1b/Slc19a1/Itch/Arf6/Lats2/Cgas/Hspa1a/Nod2/Map3k7/Zdhhc18/Lyn/Trim11/Gpatch3/Ddx60/Pum1/Tnfaip3/Kcnk6/Appl2/Trim65/Tirap/Nploc4/Arrb2/Ticam2/Cd300lf/Pik3ap1/Ccdc134/Plcg2/Zdhhc9/Appl1/Mavs/Ogt/Gdi1/Mfhas1/Zdhhc5/Trim3/Gm6377/Ubqln1/Dhx33/Otud4/Ifi207/Riok3/Aars2/Nlrx1/Pik3r1/Akt1/Lrch4/Hcfc2/App/Nlrp3/Myd88
GO:0045948	positive regulation of translational initiation	-1.80513	0.00162105	0.0374767	Atxn3/Rragc/Uhmk1/Rps6kb2/Eif2ak4/Akt2/Dnajc3/Usp4/Tbk1/Wdr24/Prkaa1/Ogt/Dhx29/Ythdf3/Rps6kb1/Ythdf1/Ywhag/Larp1/Akt1/Eif2b5/Habp4/Rxra
GO:1902100	negative regulation of metaphase/anaphase transition of cell cycle	1.8116	0.00163689	0.0375355	Mad2l1/Zwilch/Spdl1/Birc5/Aurkb/Spc24/Nuf2/Ndc80/Bub1/Kntc1/Spc25/Cdca8/Haspin/Rad21/Lcmt1/Cdc20/Mad2l1bp/Plk1/Bub1b/Ska1/Ccnb1/Trip13/Zwint/Ik/Ska3
GO:1905819	negative regulation of chromosome separation	1.8116	0.00163689	0.0375355	Mad2l1/Zwilch/Spdl1/Birc5/Aurkb/Spc24/Nuf2/Ndc80/Bub1/Kntc1/Spc25/Cdca8/Haspin/Rad21/Lcmt1/Cdc20/Mad2l1bp/Plk1/Bub1b/Ska1/Ccnb1/Trip13/Zwint/Ik/Ska3
GO:0042790	nucleolar large rRNA transcription by RNA polymerase I	-1.87755	0.0016642	0.0379921	Smarca4/Ercc2/Ubtf/Nol11/Ercc6/Tcof1/Ncl/Pwp1/Polr1e/Polr1a/Ippk/Mars1
GO:0070498	interleukin-1-mediated signaling pathway	-1.83567	0.00169048	0.0379921	Il1rl2/Irak2/Tax1bp1/Il1r2/Plcb1/Egr1/Irak3/Il1r1/Rela/Tollip/Traf6/Ikbkb/Irak4/Il1rap/Otud4/Irak1/Tnip2/Nlrp3/Myd88
GO:0019730	antimicrobial humoral response	1.73609	0.00168518	0.0379921	Kng2/Ccl8/Ighm/Rnase6/Cxcl10/Romo1/B2m/Rpl39/Rps19/Pomc/Fau/Cxcl14/Pf4/Ppbp/Lgals3/Fam3a/Rpl30/Tslp/Ang/Ccl4/Npy/Ccl9/Cxcl12/Rnase4/Ccl27a/Ccl5/Ccl6/Wfdc17/Hmgn2/Ighg2b
GO:0045995	regulation of embryonic development	-1.71481	0.00168191	0.0379921	Utp25/Ctnnb1/Rbm19/Lama5/Nfe2l2/Lama2/Hspa5/Tada2a/B4galt5/Bag6/Plcb1/Jag1/Zzz3/Ehmt1/Yeats2/Wdr5/Sgf29/Actr8/Crb2/Ino80c/Septin7/Actr5/Tenm4/Wdpcp/Tle6/Khdc3/Notch1/Tdg/Nfrkb/Dr1/Dhx36/Kat2a/Kat14
GO:0043161	proteasome-mediated ubiquitin-dependent protein catabolic process	-1.37482	0.00168236	0.0379921	Rara/Zswim8/Cop1/Keap1/Csnk1d/Znrf1/Kctd10/Kbtbd2/Hspa1b/Ppp2cb/Spopl/Ube3a/Itch/Jak2/Foxf2/Rbck1/Ubr1/Hspa1a/Plk3/Faf2/Map3k7/Paqr3/Trim39/Ncoa3/Agap3/Rnf145/Ascc2/Kctd5/Klhl12/Huwe1/Birc2/Klhdc10/Fbxl3/Trib1/Kbtbd7/Clock/Araf/Fbxw5/Snhg15/Ufl1/Fbxl4/Nploc4/Bmal1/Axin1/Sirt1/Hectd3/Fbxl6/Topors/Edem3/Ccar2/Arrb2/Naa30/Trip4/Fbxo46/Prickle1/Usp5/Rnf4/Fbxo38/Wwp1/Prkaa1/Fbxw11/Nhlrc3/Cul4a/Ubr3/Ch…
GO:0050657	nucleic acid transport	-1.63935	0.00171901	0.0383277	Pcid2/Fxr1/Ddx19a/Dhx9/Tnks/Mettl14/Zc3h11a/Senp2/Rbm33/Sidt2/Poldip3/Peg10/Ahctf1/Ranbp2/Bicd2/Pom121/Alkbh5/Nup214/Nup188/Nup88/Tgfbr2/Hnrnpa2b1/Nrde2/Zfp36/Srsf1/Thoc5/Nup133/Mcm3ap/Nup98/Pabpn1/Rbm15b/Nxf1/Pnpt1/Casc3/Ddx19b/Nup58/Hsf1/Thoc1/Ddx39a/Ncbp3/Fxr2/Khsrp/Akap8l/Fyttd1/Ythdc1/Nup54/Cpsf6/Chtop/Nup160/Mettl1/Xpo5/Fmr1/G3bp2/Xpot/Xpo1/Iws1/Gle1/Zc3h3/Seh1l/Nup153/Nsun2/Ncbp1/Rftn1/Nol…
GO:0050658	RNA transport	-1.63935	0.00171901	0.0383277	Pcid2/Fxr1/Ddx19a/Dhx9/Tnks/Mettl14/Zc3h11a/Senp2/Rbm33/Sidt2/Poldip3/Peg10/Ahctf1/Ranbp2/Bicd2/Pom121/Alkbh5/Nup214/Nup188/Nup88/Tgfbr2/Hnrnpa2b1/Nrde2/Zfp36/Srsf1/Thoc5/Nup133/Mcm3ap/Nup98/Pabpn1/Rbm15b/Nxf1/Pnpt1/Casc3/Ddx19b/Nup58/Hsf1/Thoc1/Ddx39a/Ncbp3/Fxr2/Khsrp/Akap8l/Fyttd1/Ythdc1/Nup54/Cpsf6/Chtop/Nup160/Mettl1/Xpo5/Fmr1/G3bp2/Xpot/Xpo1/Iws1/Gle1/Zc3h3/Seh1l/Nup153/Nsun2/Ncbp1/Rftn1/Nol…
GO:0002475	antigen processing and presentation via MHC class Ib	1.875	0.00174175	0.038682	H2-K1/H2-M3/B2m/H2-T23/H2-Q4/H2-D1/H2-Q9/H2-Q7/H2-T22/Ulbp1
GO:0002224	toll-like receptor signaling pathway	-1.68478	0.00175534	0.0388309	Tirap/Lrrfip2/Arrb2/Ticam2/Cd300lf/Pik3ap1/Ccdc134/Plcg2/Ap3b1/Gdi1/Mfhas1/Mapkapk2/Hspd1/Trim3/Gm6377/Tlr7/Otud4/Tlr13/Akt1/Lrch4/App/Myd88
GO:0000470	maturation of LSU-rRNA	-1.79314	0.0017646	0.0388832	Rrp15/Pes1/Urb1/Ddx18/Mak16/Gtpbp4/Ddx55/Wdr12/Bop1/Nol9/Las1l/Ftsj3/Nop2/Ppan
GO:0006997	nucleus organization	-1.55548	0.00178917	0.0392712	Suv39h1/Pygo2/Pes1/Spast/Baz2a/Bend3/Nup133/Nup98/Lemd3/Ift88/Sf1/Vps4b/Kdm3a/Tmem201/Dctn1/Chmp7/Smarca5/Sun1/Akap8l/Ubtf/Zmpste24/Zfp354a/Sirt1/Phf8/Nfe2l1/Phf2/Nup54/Mfsd14a/Ndel1/Cfap43/Ubxn2a/Gopc/Vps4a/Icmt/Daxx/Seh1l/Agfg1/Nup153/Rrp8/Uspl1/Habp4/Usp36/Zpr1/Polr1b/Rrn3/Nolc1
GO:0045732	positive regulation of protein catabolic process	-1.50325	0.00181201	0.0396183	Tnfaip3/Sh3d19/Trib1/Tnfrsf1b/Axin1/Vps11/Gga3/Rnf185/Sirt1/Prickle1/Usp5/Cul4a/Ubr3/Chfr/Gga1/Fbxw8/Ddb1/Ube2v2/Tmtc3/Nrdc/Socs5/Atg7/Psen1/Vps35/Snx33/Fmr1/Rnf40/Sorl1/Ubxn2a/Eif2ak3/Ubqln1/Mdm2/Snx9/Nsf/Msn/Gsk3a/Akt1/Zyg11b/Adam9/App/Dvl1/Dab2/Tiparp/Rhbdd1/Snx1
GO:0000288	nuclear-transcribed mRNA catabolic process, deadenylation-dependent decay	-1.72543	0.00183144	0.0398885	Hnrnpd/Cpeb3/Cnot7/Dcp1a/Dcp1b/Zfp36/Tent4a/Parn/Ago2/Caprin1/Mlh1/Cnot3/Pde12/Csde1/Fmr1/Hnrnpu/Patl1/Syncrip/Tent4b/Eif4enif1/Zfp36l2/Pan2/Dhx36
GO:0006264	mitochondrial DNA replication	-1.92811	0.00186416	0.040308	Dna2/Mtnap1/Rrm2b/Mettl4/Rnaseh1/Lig3/Twnk/Atg7/Polg/Dnaja3
GO:0033047	regulation of mitotic sister chromatid segregation	1.75383	0.00186499	0.040308	Cdk1/Mad2l1/Zwilch/Spdl1/Birc5/Aurkb/Spc24/Nuf2/Ndc80/Bub1/Kntc1/Spc25/Cdca8/Haspin/Rad21/Lcmt1/Cdc20/Mad2l1bp/Plk1/Bub1b/Ska1/Ccnb1/Trip13/Zwint/Ik/Ska3
GO:0062013	positive regulation of small molecule metabolic process	-1.54095	0.00188467	0.0405781	Dyrk2/Mlst8/Oprm1/Hif1a/Bend3/Elovl5/Wdr5/Akt2/Paqr3/Prkag2/Ppp4r3a/Ppp4r3b/Bcl2l1/Fdps/Supt20/Sorbs1/Slc25a12/Lpgat1/Sirt1/Arnt/Prkaa1/Myc/Abcd2/Ddb1/Ppara/Tcf7l2/Pla2g4a/Psen1/Acsl5/Pptc7/Cpt1a/Mlxipl/Akt1/Ppp1r3b/Gpd1/App/Irs2/Plaa/Gpr146/Kat2a/Dab2/Qki/Tigar/Stat3/Cd244a
GO:0046638	positive regulation of alpha-beta T cell differentiation	-1.78894	0.00190016	0.040756	Syk/Ikzf1/Brd2/Tgfbr2/Nckap1l/Rara/Nfkbiz/Zbtb7b/Ccr7/Ep300/Opa1/Malt1/Itpkb/Ripk2/Ap3b1/Socs5/Gpr65/Nlrp3/Runx1/Il4ra
GO:0006590	thyroid hormone generation	1.86727	0.00194578	0.04143	Duoxa1/Hpn/Slco1c1/Slc16a2/Cpq/Ctsb/Slc5a5/Slc16a10
GO:0098813	nuclear chromosome segregation	1.49675	0.00194628	0.04143	Ncaph/Cdk1/Ccne2/Pmf1/Mad2l1/Zwilch/Ccne1/Syce2/Spdl1/Psrc1/Birc5/Aurkb/Bcl7a/Spc24/Cenpf/Kash5/Nuf2/Tpx2/Ndc80/Cit/Anapc11/Chek2/Cenpk/Sgo1/Cdc6/Bub1/Ska2/Top2a/Kntc1/Spc25/Chmp5/Arid1a/Cdca8/Kif22/Nusap1/Klhdc8b/Tacc3/Haspin/Rab11a/Mybl2/Aurka/Rad21/Rmi2/Ube2b/Uhrf1/Wrap73/Ube2c/Lcmt1/Cdc20/Nek2/Nsl1/Prc1/Brca2/Ect2/Mad2l1bp/Msh5/Smc2/Kif15/Kif18b/Chmp4b/Plk1/Aaas/Brip1/Tex12/Tubg1/Ncapg/Kif23/…
GO:0034058	endosomal vesicle fusion	-1.99807	0.00196457	0.0416622	Vps41/Samd9l/Ankfy1/Vps39/Tgfbrap1/Rufy1/Vps8/Vps11/Vps4a
GO:0019882	antigen processing and presentation	1.61475	0.00198838	0.0420092	Psmb9/Trem2/H2-K1/Cst7/Ighm/Relb/H2-M3/H2-DMa/Unc93b1/Psmb8/B2m/H2-Aa/H2-T23/H2-Ab1/Clec4a2/Mpeg1/Cd68/Psme2/Psme1/H2-Q4/H2-DMb1/H2-D1/H2-Eb1/H2-Q9/H2-Q7/H2-T22/Cd74/H2-Ob/Fcer1g/Tapbp/H2-Oa/Ulbp1
GO:0033604	negative regulation of catecholamine secretion	1.91685	0.00203805	0.0425802	P2ry12/Ptger3/Adra2a/Crhr2/Gabbr1
GO:0045839	negative regulation of mitotic nuclear division	1.72435	0.00203495	0.0425802	Mad2l1/Zwilch/Spdl1/Birc5/Aurkb/Spc24/Nuf2/Ndc80/Bub1/Kntc1/Spc25/Cdca8/Haspin/Rad21/Lcmt1/Cdc20/Mad2l1bp/Plk1/Bub1b/Ska1/Ccnb1/Trip13/Nme6/Zwint/Ik/Ska3/Esr1/Bub3
GO:0031047	regulatory ncRNA-mediated gene silencing	-1.61695	0.00202842	0.0425802	Rbm4/Adar/Dnmt3b/Fbxo24/Cnot7/Mir339/Hnrnpa2b1/Mecp2/Nrde2/Zfp36/Zswim8/Hnrnpk/Parn/Arb2a/Fkbp6/Ncbp3/Srrt/Pum1/Ago2/Wtip/Ripk1/Zmpste24/Dgcr8/Tdrd7/Mir23a/Cnot3/Snd1/Mir17hg/Cul4a/Eif4g1/Zc3h10/Xpo5/Tut7/Fmr1/Lncppara/Hnrnpu/Cnot10/Piwil2/Spout1/Ncbp1/Eif4enif1/Zc3h7a/Tsnax/Trub1/Stat3
GO:2000736	regulation of stem cell differentiation	-1.66505	0.00208961	0.0434962	Ap2a2/Prickle1/Nr6a1/Prdm4/Cdk6/Notch1/Pwp1/Gatad2a/Hnrnpu/Mta2/Bbs12/Smyd5/Nsun2/Zfp36l2/Dhx36/Hspa9/Pus7/Stat3/Mta1
GO:0006631	fatty acid metabolic process	1.41956	0.00211975	0.0439615	Hacd4/Adtrp/Decr1/Mgll/Acads/Lpl/Cryl1/Mgst3/Alkbh7/Fabp3/Mtln/Hpgd/Pccb/Tbxas1/Acsbg1/Cyb5a/Brca1/Cav1/Tecr/Gstm4/Mif/Gstp1/Akr1b1/Gpx4/Fa2h/Ptgr1/Ndufs6/Prxl2b/Bdh2/Hsd17b10/Nudt7/Lipa/Plp1/Blvra/Acadl/Asah2/Dbi/Gstm7/Pecr/Acot9/Acad12/Cd74/Acat1/Mblac2/Gstm1/Hadhb/Apoc1/Cyp2j12/Acaa1a/Snca/Gdf15/Cyp2j6/Etfa/Bckdk/Akr1c13/Pgk1/Ceacam1/Fads6/Ech1/Acot7/Cthrc1/Sox9/Cyp2e1/Ndufab1/Hpgds/Cpt1c/Decr…
GO:0042178	xenobiotic catabolic process	1.85558	0.00214534	0.044217	Gstm5/Pon3/Gstm4/Gstm7/Gstm1/Acaa1a
GO:0000466	maturation of 5.8S rRNA from tricistronic rRNA transcript (SSU-rRNA, 5.8S rRNA, LSU-rRNA)	-1.80554	0.00214775	0.044217	Rcl1/Pes1/Urb1/Exosc10/Nop9/Exosc2/Rpp40/Wdr12/Bop1/Nol9/Kri1/Ftsj3/Rrs1
GO:1904950	negative regulation of establishment of protein localization	1.56764	0.00216692	0.0444495	Adtrp/Mapt/Pkig/Pde8b/Ptger3/Anxa5/Txn1/Ndufaf2/Adra2a/Rsad2/Erp29/Crhr2/Lyplal1/Ifnb1/Kcnb1/Sumo1/Snx3/Park7/Erlec1/Aldh7a1/Ptpn11/Bard1/Gnaz/Cyp51/Pkia/Fkbp1b/Mdfic/Ndfip1/Dmtn/Itgb1bp1/Cd36/Hadh/Derl2/Idh2/Ubac2/Terf1/Il12b/Ptpmt1/Sirt4
GO:0006006	glucose metabolic process	-1.4828	0.00220844	0.045137	Pcx/Foxk2/Sik1/Acacb/Dyrk2/Pgm2/Gpt2/Oprm1/Hif1a/Pdk4/Kbtbd2/Wdr5/Bcl2l13/Pfkfb4/Akt2/Fbp1/Ep300/Prkag2/Ppp4r3a/Slc35b4/Ppp4r3b/Supt20/Atf4/Sorbs1/Dgkq/Zmpste24/Slc25a12/Crtc2/Mtcl2/Sirt1/Nfe2l1/Prkaa1/Myc/Ddb1/Ppara/Tcf7l2/Ogt/Nisch/Cpt1a/Clk2/Slc37a4/Sesn2/Dlat/Pik3r1/Xpc/Akt1/Ppp1r3b/Gpd1/Pdha1/Zfp692/Irs2/Kat2a/Usp7/Tigar/Serp1/Slc39a14
GO:0007091	metaphase/anaphase transition of mitotic cell cycle	1.64446	0.00225283	0.0458781	Mad2l1/Zwilch/Spdl1/Birc5/Aurkb/Bcl7a/Spc24/Nuf2/Ndc80/Cit/Anapc11/Cdc6/Bub1/Kntc1/Spc25/Arid1a/Cdca8/Tacc3/Haspin/Rad21/Ube2c/Lcmt1/Cdc20/Mad2l1bp/Plk1/Anapc7/Bub1b/Bcl7c/Nsmce2/Ska1/Ccnb1/Trip13/Zwint/Ik/Actb/Dpf1/Ska3
GO:0110095	cellular detoxification of aldehyde	1.90499	0.00227386	0.0461396	Akr1a1/Pnkd/Park7/Aldh2/Esd/Aldh1a1/Hagh/Haghl/Adh5/Rdh11/Gatd1
GO:0031294	lymphocyte costimulation	1.75973	0.0023162	0.0468304	Icos/Cd80/Cav1/Cd5/Card11/Tnfsf13b/Cd81/Ephb4/Efnb2/Lgals1/Cd320/Efnb3
GO:0019886	antigen processing and presentation of exogenous peptide antigen via MHC class II	1.86617	0.0023534	0.0474126	H2-DMa/Unc93b1/B2m/H2-Aa/H2-Ab1/H2-DMb1/H2-Eb1/Cd74/H2-Ob/Fcer1g/H2-Oa
GO:0031577	spindle checkpoint signaling	1.77788	0.00237003	0.0475778	Mad2l1/Zwilch/Spdl1/Birc5/Aurkb/Spc24/Nuf2/Ndc80/Bub1/Kntc1/Spc25/Cdca8/Haspin/Lcmt1/Cdc20/Mad2l1bp/Plk1/Bub1b/Ska1/Ccnb1/Trip13/Zwint/Ik/Ska3
GO:0002474	antigen processing and presentation of peptide antigen via MHC class I	1.75635	0.00241949	0.0482274	H2-K1/H2-M3/B2m/H2-T23/Clec4a2/Mpeg1/H2-Q4/H2-D1/H2-Q9/H2-Q7/H2-T22/Fcer1g/Tapbp/Ulbp1/Clec4a3/Ifi30/H2-Q6/Fcgr1/Get3/H2-T24
GO:0045132	meiotic chromosome segregation	1.69504	0.00241376	0.0482274	Ncaph/Ccne2/Ccne1/Syce2/Kash5/Nuf2/Ndc80/Sgo1/Ska2/Top2a/Haspin/Aurka/Ube2b/Brca2/Msh5/Smc2/Plk1/Brip1/Tex12/M1ap/Iho1/Pttg1/Ska1/Fancd2/Trip13/Terf1/Zwint/Ccnb2/Ska3/Smc4/Ncaph2
GO:0150079	negative regulation of neuroinflammatory response	1.89992	0.00247597	0.0490069	Nr1d1/Trem2/Cst7/Cd200r1/Igf1/Ifnb1/Grn
GO:0016180	snRNA processing	-1.7222	0.00247492	0.0490069	Ints2/Usb1/Ints4/Ints7/Ints6l/Fto/Ints10/Toe1/Ints11/Mettl4/Ints14/Exosc2/Ints6/Dkc1/Ints8/Mettl16/Ints5/Tut1/Ints13
GO:0045622	regulation of T-helper cell differentiation	-1.77188	0.00249528	0.0492164	Brd2/Smad7/Jak3/Rara/Nfkbiz/Tnfsf18/Zbtb7b/Ccr7/Ep300/Opa1/Malt1/Ripk2/Zc3h12a/Socs5/Zfp35/Gpr65/Bcl6/Nlrp3/Il4ra
GO:0006414	translational elongation	-1.63009	0.00252873	0.0497022	Gfm1/Skic2/Ascc2/Secisbp2/Klhdc10/Sars1/Ankzf1/Ufl1/Trip4/Sepsecs/Trnt1/Nemf/Usp16/Efl1/Aars1/Usp10/Abce1/Smyd5/Ltn1/Tcf25/Elac1/Cpeb2/Zfp598/Alkbh1
GO:0051306	mitotic sister chromatid separation	1.71531	0.00254432	0.0498352	Mad2l1/Zwilch/Spdl1/Birc5/Aurkb/Spc24/Nuf2/Ndc80/Anapc11/Bub1/Kntc1/Spc25/Cdca8/Haspin/Rad21/Ube2c/Lcmt1/Cdc20/Mad2l1bp/Plk1/Anapc7/Bub1b/Nsmce2/Ska1/Ccnb1/Trip13/Zwint/Ik
