# Supplementary material
Source: Research Square preprint supplement (doi:10.21203/rs.3.rs-10072088/v1)
Supplement: Supplementary file 9 [file 96abc3bdf00ff22e510396a8.xlsx]

## Sheet: CBD-DownDEG_GO BP
CBD effects: Brain-wide GWI_LPS_DownDEG-GO:BP
ID	Description	FoldEnrichment	pvalue	p.adjust	geneID
GO:0002443	leukocyte mediated immunity	14.4217	1.22118e-10	7.56388e-08	C1qa/Fcgr3/Icam1/C1qb/Fcgr2b/C1qc/Fcgr1/Lgals9/Itgb2/H2-K1/Il4ra
GO:0002449	lymphocyte mediated immunity	17.793	1.26804e-10	7.56388e-08	C1qa/Fcgr3/Icam1/C1qb/Fcgr2b/C1qc/Fcgr1/Lgals9/H2-K1/Il4ra
GO:0016064	immunoglobulin mediated immune response	28.2315	4.25448e-09	1.49554e-06	C1qa/Fcgr3/C1qb/Fcgr2b/C1qc/Fcgr1/Il4ra
GO:0019724	B cell mediated immunity	27.4473	5.18592e-09	1.49554e-06	C1qa/Fcgr3/C1qb/Fcgr2b/C1qc/Fcgr1/Il4ra
GO:0002478	antigen processing and presentation of exogenous peptide antigen	73.0125	6.26799e-09	1.49554e-06	Fcgr3/Fcgr2b/Fcgr1/Ifi30/H2-K1
GO:0002460	adaptive immune response based on somatic recombination of immune receptors built from immunoglobulin superfamily domains	14.0637	9.60367e-09	1.90953e-06	C1qa/Fcgr3/Icam1/C1qb/Fcgr2b/C1qc/Fcgr1/H2-K1/Il4ra
GO:0042590	antigen processing and presentation of exogenous peptide antigen via MHC class I	141.157	1.27876e-08	2.17937e-06	Fcgr3/Fcgr1/Ifi30/H2-K1
GO:0019884	antigen processing and presentation of exogenous antigen	60.496	1.69608e-08	2.52928e-06	Fcgr3/Fcgr2b/Fcgr1/Ifi30/H2-K1
GO:0002250	adaptive immune response	10.7058	1.00717e-07	1.33505e-05	C1qa/Fcgr3/Icam1/C1qb/Fcgr2b/C1qc/Fcgr1/H2-K1/Il4ra
GO:0019882	antigen processing and presentation	25.1568	1.20693e-07	1.43987e-05	Fcgr3/Icam1/Fcgr2b/Fcgr1/Ifi30/H2-K1
GO:0048002	antigen processing and presentation of peptide antigen	37.1467	2.10744e-07	2.23256e-05	Fcgr3/Fcgr2b/Fcgr1/Ifi30/H2-K1
GO:1904996	positive regulation of leukocyte adhesion to vascular endothelial cell	73.6473	2.24566e-07	2.23256e-05	Icam1/Selp/Sele/Itgb2
GO:0002438	acute inflammatory response to antigenic stimulus	70.5787	2.69026e-07	2.46883e-05	Fcgr3/Icam1/Fcgr2b/Fcgr1
GO:0045123	cellular extravasation	34.151	3.22944e-07	2.75194e-05	Icam1/Selp/Pecam1/Sele/Itgb2
GO:0002703	regulation of leukocyte mediated immunity	14.0488	5.22937e-07	4.15909e-05	Fcgr3/Fcgr2b/Fcgr1/Lgals9/Itgb2/H2-K1/Il4ra
GO:1904994	regulation of leukocyte adhesion to vascular endothelial cell	58.41	5.9629e-07	4.44609e-05	Icam1/Selp/Sele/Itgb2
GO:0002526	acute inflammatory response	29.0049	7.35744e-07	5.16319e-05	Fcgr3/Icam1/Fcgr2b/Fcgr1/Lcn2
GO:0002697	regulation of immune effector process	10.0827	9.04859e-07	5.9972e-05	Fcgr3/Fcgr2b/Pglyrp1/Fcgr1/Lgals9/Itgb2/H2-K1/Il4ra
GO:0002455	humoral immune response mediated by circulating immunoglobulin	48.3968	1.30136e-06	8.17116e-05	C1qa/C1qb/Fcgr2b/C1qc
GO:0002474	antigen processing and presentation of peptide antigen via MHC class I	45.7808	1.63598e-06	9.75862e-05	Fcgr3/Fcgr1/Ifi30/H2-K1
GO:0002691	regulation of cellular extravasation	43.433	2.03058e-06	0.000110353	Icam1/Selp/Pecam1/Sele
GO:0001906	cell killing	15.5879	2.035e-06	0.000110353	Fcgr3/Fcgr2b/Pglyrp1/Fcgr1/Lgals9/H2-K1
GO:0002524	hypersensitivity	105.868	2.62195e-06	0.000136	Fcgr3/Fcgr2b/Fcgr1
GO:0002444	myeloid leukocyte mediated immunity	22.0558	2.87941e-06	0.000143131	Fcgr3/Fcgr2b/Fcgr1/Itgb2/Il4ra
GO:0038094	Fc-gamma receptor signaling pathway	97.7244	3.40301e-06	0.000162391	Fcgr3/Fcgr2b/Fcgr1
GO:0061756	leukocyte adhesion to vascular endothelial cell	37.642	3.64143e-06	0.000167086	Icam1/Selp/Sele/Itgb2
GO:0002864	regulation of acute inflammatory response to antigenic stimulus	90.744	4.32407e-06	0.00019106	Fcgr3/Fcgr2b/Fcgr1
GO:0001909	leukocyte mediated cytotoxicity	19.9751	4.69357e-06	0.00019998	Fcgr3/Fcgr2b/Fcgr1/Lgals9/H2-K1
GO:0006911	phagocytosis, engulfment	34.5692	5.14356e-06	0.000211595	Fcgr3/Fcgr2b/Fcgr1/Itgb2
GO:0038093	Fc receptor signaling pathway	79.401	6.63084e-06	0.000263686	Fcgr3/Fcgr2b/Fcgr1
GO:0002437	inflammatory response to antigenic stimulus	31.9602	7.0611e-06	0.000271738	Fcgr3/Icam1/Fcgr2b/Fcgr1
GO:0002886	regulation of myeloid leukocyte mediated immunity	31.3683	7.61319e-06	0.000276966	Fcgr3/Fcgr1/Itgb2/Il4ra
GO:0050900	leukocyte migration	9.38071	7.66125e-06	0.000276966	Fcgr3/Icam1/Selp/Pecam1/Sele/Lgals9/Itgb2
GO:0006959	humoral immune response	17.3554	9.34321e-06	0.000322498	C1qa/C1qb/Fcgr2b/Pglyrp1/C1qc
GO:0099024	plasma membrane invagination	29.7173	9.46137e-06	0.000322498	Fcgr3/Fcgr2b/Fcgr1/Itgb2
GO:0098883	synapse pruning	66.864	1.1418e-05	0.000378379	C1qa/C1qb/C1qc
GO:1903039	positive regulation of leukocyte cell-cell adhesion	11.2426	1.33372e-05	0.000421038	Icam1/Selp/Sele/Lgals9/Itgb2/Il4ra
GO:0002888	positive regulation of myeloid leukocyte mediated immunity	63.5208	1.34111e-05	0.000421038	Fcgr3/Fcgr1/Itgb2
GO:0007159	leukocyte cell-cell adhesion	8.54267	1.40848e-05	0.000430851	Icam1/Selp/Pecam1/Sele/Lgals9/Itgb2/Il4ra
GO:0002687	positive regulation of leukocyte migration	15.8012	1.47448e-05	0.000439762	Icam1/Selp/Pecam1/Sele/Lgals9
GO:0010324	membrane invagination	26.0598	1.60002e-05	0.000465567	Fcgr3/Fcgr2b/Fcgr1/Itgb2
GO:0006958	complement activation, classical pathway	52.934	2.36565e-05	0.000671957	C1qa/C1qb/C1qc
GO:0002366	leukocyte activation involved in immune response	9.92513	2.69883e-05	0.000748768	Icam1/Pglyrp1/Lgals9/Lcp1/Itgb2/Il4ra
GO:0002263	cell activation involved in immune response	9.77244	2.94458e-05	0.000798384	Icam1/Pglyrp1/Lgals9/Lcp1/Itgb2/Il4ra
GO:0002706	regulation of lymphocyte mediated immunity	13.5728	3.0703e-05	0.000813972	Fcgr3/Fcgr2b/Fcgr1/Lgals9/H2-K1
GO:0002861	regulation of inflammatory response to antigenic stimulus	47.0525	3.40213e-05	0.000882335	Fcgr3/Fcgr2b/Fcgr1
GO:0006898	receptor-mediated endocytosis	9.48072	3.49022e-05	0.000885922	Fcgr2b/Ifitm3/Fcgr1/Sele/Anxa2/Itgb2
GO:0022409	positive regulation of cell-cell adhesion	9.30708	3.87066e-05	0.00096202	Icam1/Selp/Sele/Lgals9/Itgb2/Il4ra
GO:0032640	tumor necrosis factor production	12.6033	4.37806e-05	0.0010446	Fcgr3/Fcgr2b/Fcgr1/Lgals9/Tspo
GO:0032680	regulation of tumor necrosis factor production	12.6033	4.37806e-05	0.0010446	Fcgr3/Fcgr2b/Fcgr1/Lgals9/Tspo
GO:0071706	tumor necrosis factor superfamily cytokine production	12.4551	4.63249e-05	0.0010628	Fcgr3/Fcgr2b/Fcgr1/Lgals9/Tspo
GO:1903555	regulation of tumor necrosis factor superfamily cytokine production	12.4551	4.63249e-05	0.0010628	Fcgr3/Fcgr2b/Fcgr1/Lgals9/Tspo
GO:0002822	regulation of adaptive immune response based on somatic recombination of immune receptors built from immunoglobulin superfamily domains	12.3102	4.89823e-05	0.00110256	Fcgr3/Fcgr2b/Fcgr1/H2-K1/Il4ra
GO:0045807	positive regulation of endocytosis	12.0305	5.46505e-05	0.00120737	Fcgr3/Fcgr2b/Fcgr1/Sele/Anxa2
GO:0002285	lymphocyte activation involved in immune response	11.6339	6.409e-05	0.00139017	Icam1/Pglyrp1/Lgals9/Lcp1/Il4ra
GO:0002819	regulation of adaptive immune response	11.3228	7.2879e-05	0.00155258	Fcgr3/Fcgr2b/Fcgr1/H2-K1/Il4ra
GO:0002673	regulation of acute inflammatory response	36.2976	7.51445e-05	0.00157276	Fcgr3/Fcgr2b/Fcgr1
GO:0150146	cell junction disassembly	35.2894	8.18429e-05	0.00167281	C1qa/C1qb/C1qc
GO:1903037	regulation of leukocyte cell-cell adhesion	8.11768	8.27291e-05	0.00167281	Icam1/Selp/Sele/Lgals9/Itgb2/Il4ra
GO:0002237	response to molecule of bacterial origin	8.01525	8.87282e-05	0.00173904	Ly86/Fcgr2b/Lgals9/Lcn2/Tspo/Hmgcs2
GO:0006956	complement activation	34.3356	8.892e-05	0.00173904	C1qa/C1qb/C1qc
GO:0002685	regulation of leukocyte migration	10.748	9.32283e-05	0.00179389	Icam1/Selp/Pecam1/Sele/Lgals9
GO:0032760	positive regulation of tumor necrosis factor production	16.4455	9.80286e-05	0.00185632	Fcgr3/Fcgr2b/Fcgr1/Lgals9
GO:1903557	positive regulation of tumor necrosis factor superfamily cytokine production	16.2874	0.000101779	0.00189722	Fcgr3/Fcgr2b/Fcgr1/Lgals9
GO:0071219	cellular response to molecule of bacterial origin	10.482	0.000104916	0.00191205	Ly86/Fcgr2b/Lcn2/Tspo/Hmgcs2
GO:0006909	phagocytosis	10.4304	0.000107382	0.00191205	Fcgr3/Fcgr2b/Pecam1/Fcgr1/Itgb2
GO:0042742	defense response to bacterium	10.4304	0.000107382	0.00191205	Pglyrp1/Fcgr1/Lgals9/Lcn2/H2-K1
GO:0007157	heterophilic cell-cell adhesion via plasma membrane cell adhesion molecules	31.7604	0.000112518	0.00197403	Selp/Sele/Lgals9
GO:1904646	cellular response to amyloid-beta	30.9858	0.000121204	0.00209561	Icam1/Fcgr2b/Lcn2
GO:0002698	negative regulation of immune effector process	15.124	0.000135642	0.00231173	Fcgr2b/Pglyrp1/Lgals9/Il4ra
GO:0043300	regulation of leukocyte degranulation	29.5446	0.000139863	0.00235009	Lgals9/Itgb2/Il4ra
GO:0002274	myeloid leukocyte activation	9.71267	0.000150026	0.00248584	C1qa/Fcgr3/Lgals9/Itgb2/Il4ra
GO:0002699	positive regulation of immune effector process	9.53766	0.000163328	0.00266919	Fcgr3/Fcgr1/Itgb2/H2-K1/Il4ra
GO:0071216	cellular response to biotic stimulus	9.28667	0.000184955	0.00298178	Ly86/Fcgr2b/Lcn2/Tspo/Hmgcs2
GO:1904645	response to amyloid-beta	26.467	0.000194437	0.00309284	Icam1/Fcgr2b/Lcn2
GO:0002705	positive regulation of leukocyte mediated immunity	13.6604	0.0002008	0.00315203	Fcgr3/Fcgr1/Itgb2/H2-K1
GO:0061028	establishment of endothelial barrier	25.9269	0.000206782	0.00320377	Icam1/Pecam1/Cldn5
GO:1905144	response to acetylcholine	24.9101	0.000232973	0.00356329	Ly6c1/Ly6a/Tspo
GO:0098742	cell-cell adhesion via plasma-membrane adhesion molecules	8.74943	0.000243927	0.0036836	Selp/Pecam1/Sele/Cldn5/Lgals9
GO:0002712	regulation of B cell mediated immunity	23.5262	0.000276141	0.00406711	Fcgr3/Fcgr2b/Fcgr1
GO:0002889	regulation of immunoglobulin mediated immune response	23.5262	0.000276141	0.00406711	Fcgr3/Fcgr2b/Fcgr1
GO:0002863	positive regulation of inflammatory response to antigenic stimulus	76.9949	0.000294234	0.00428075	Fcgr3/Fcgr1
GO:2000377	regulation of reactive oxygen species metabolic process	12.0992	0.000319433	0.00459136	Fbln5/Lcn2/Tspo/Itgb2
GO:0003158	endothelium development	11.9288	0.000337156	0.00478841	Icam1/Pecam1/Cldn5/Lcn2
GO:1903238	positive regulation of leukocyte tethering or rolling	65.1496	0.000416039	0.00583924	Selp/Sele
GO:0051250	negative regulation of lymphocyte activation	11.144	0.000436512	0.00602687	Fcgr2b/Pglyrp1/Lgals9/Il4ra
GO:0022407	regulation of cell-cell adhesion	5.9644	0.000439512	0.00602687	Icam1/Selp/Sele/Lgals9/Itgb2/Il4ra
GO:0032823	regulation of natural killer cell differentiation	60.496	0.000484659	0.00657043	Pglyrp1/Lgals9
GO:0045428	regulation of nitric oxide biosynthetic process	18.9614	0.00052221	0.00699996	Icam1/Tspo/Itgb2
GO:0001885	endothelial cell development	18.1488	0.000593827	0.00770038	Icam1/Pecam1/Cldn5
GO:0080164	regulation of nitric oxide metabolic process	18.1488	0.000593827	0.00770038	Icam1/Tspo/Itgb2
GO:2000379	positive regulation of reactive oxygen species metabolic process	18.1488	0.000593827	0.00770038	Lcn2/Tspo/Itgb2
GO:0043299	leukocyte degranulation	17.8932	0.000619022	0.00785631	Lgals9/Itgb2/Il4ra
GO:0050766	positive regulation of phagocytosis	17.8932	0.000619022	0.00785631	Fcgr3/Fcgr2b/Fcgr1
GO:0045785	positive regulation of cell adhesion	5.53558	0.000651776	0.00818494	Icam1/Selp/Sele/Lgals9/Itgb2/Il4ra
GO:0032496	response to lipopolysaccharide	7.03442	0.000662296	0.0082304	Ly86/Lgals9/Lcn2/Tspo/Hmgcs2
GO:1903236	regulation of leukocyte tethering or rolling	49.8203	0.000721104	0.0088393	Selp/Sele
GO:0050777	negative regulation of immune response	9.73499	0.000726112	0.0088393	Fcgr2b/Pglyrp1/Lgals9/Il4ra
GO:0002695	negative regulation of leukocyte activation	9.56999	0.000774059	0.0093278	Fcgr2b/Pglyrp1/Lgals9/Il4ra
GO:0002675	positive regulation of acute inflammatory response	47.0525	0.000810039	0.00956808	Fcgr3/Fcgr1
GO:0019886	antigen processing and presentation of exogenous peptide antigen via MHC class II	47.0525	0.000810039	0.00956808	Fcgr2b/Ifi30
GO:0006809	nitric oxide biosynthetic process	15.8802	0.000876974	0.0102572	Icam1/Tspo/Itgb2
GO:0050727	regulation of inflammatory response	6.49497	0.000948383	0.0109727	Fcgr3/Fcgr2b/Pglyrp1/Fcgr1/Lgals9
GO:0009611	response to wounding	5.14339	0.000956549	0.0109727	Selp/Pecam1/Angptl4/Anxa2/Lcp1/Tspo
GO:0030100	regulation of endocytosis	6.43575	0.000988063	0.0112263	Fcgr3/Fcgr2b/Fcgr1/Sele/Anxa2
GO:0071222	cellular response to lipopolysaccharide	8.77663	0.00106833	0.0120237	Ly86/Lcn2/Tspo/Hmgcs2
GO:0046209	nitric oxide metabolic process	14.7723	0.00108182	0.0120618	Icam1/Tspo/Itgb2
GO:0002693	positive regulation of cellular extravasation	40.3307	0.00110688	0.0122269	Icam1/Pecam1
GO:0050866	negative regulation of cell activation	8.64229	0.00113117	0.0123806	Fcgr2b/Pglyrp1/Lgals9/Il4ra
GO:2001057	reactive nitrogen species metabolic process	14.4366	0.00115626	0.0125402	Icam1/Tspo/Itgb2
GO:0002495	antigen processing and presentation of peptide antigen via MHC class II	38.4975	0.00121576	0.0130667	Fcgr2b/Ifi30
GO:1990266	neutrophil migration	13.9606	0.00127386	0.0135689	Fcgr3/Pecam1/Itgb2
GO:0045921	positive regulation of exocytosis	13.5151	0.00139875	0.0147674	Anxa2/Itgb2/Il4ra
GO:0017157	regulation of exocytosis	8.10473	0.00143374	0.0147676	Anxa2/Lgals9/Itgb2/Il4ra
GO:0002504	antigen processing and presentation of peptide or polysaccharide antigen via MHC class II	35.2894	0.00144829	0.0147676	Fcgr2b/Ifi30
GO:0032689	negative regulation of type II interferon production	35.2894	0.00144829	0.0147676	Pglyrp1/Lgals9
GO:0043302	positive regulation of leukocyte degranulation	35.2894	0.00144829	0.0147676	Itgb2/Il4ra
GO:1902106	negative regulation of leukocyte differentiation	12.9634	0.0015769	0.0159427	Pglyrp1/C1qc/Il4ra
GO:0042116	macrophage activation	12.7042	0.00167106	0.0166131	C1qa/Lgals9/Il4ra
GO:0050764	regulation of phagocytosis	12.7042	0.00167106	0.0166131	Fcgr3/Fcgr2b/Fcgr1
GO:0043032	positive regulation of macrophage activation	32.5748	0.00170036	0.0167647	Lgals9/Il4ra
GO:0007160	cell-matrix adhesion	7.66466	0.0017596	0.0170667	Fam107a/Pecam1/Anxa2/Itgb2
GO:0072593	reactive oxygen species metabolic process	7.66466	0.0017596	0.0170667	Fbln5/Lcn2/Tspo/Itgb2
GO:1903707	negative regulation of hemopoiesis	12.2155	0.0018698	0.0179893	Pglyrp1/C1qc/Il4ra
GO:0002286	T cell activation involved in immune response	12.0992	0.00192169	0.0183406	Icam1/Lcp1/Il4ra
GO:2000352	negative regulation of endothelial cell apoptotic process	30.248	0.00197179	0.0185476	Icam1/Angptl4
GO:0002708	positive regulation of lymphocyte mediated immunity	11.9851	0.00197447	0.0185476	Fcgr3/Fcgr1/H2-K1
GO:0050901	leukocyte tethering or rolling	29.205	0.00211471	0.0197098	Selp/Sele
GO:0001779	natural killer cell differentiation	28.2315	0.00226241	0.020762	Pglyrp1/Lgals9
GO:0090322	regulation of superoxide metabolic process	28.2315	0.00226241	0.020762	Fbln5/Itgb2
GO:0002824	positive regulation of adaptive immune response based on somatic recombination of immune receptors built from immunoglobulin superfamily domains	11.343	0.00231019	0.0210386	Fcgr3/Fcgr1/H2-K1
GO:0006910	phagocytosis, recognition	27.3208	0.00241485	0.0218252	Fcgr3/Fcgr1
GO:0097530	granulocyte migration	10.9519	0.00255252	0.0228959	Fcgr3/Pecam1/Itgb2
GO:0045446	endothelial cell differentiation	10.8583	0.00261547	0.0232855	Icam1/Pecam1/Cldn5
GO:2000515	negative regulation of CD4-positive, alpha-beta T cell activation	25.665	0.00273391	0.0241597	Lgals9/Il4ra
GO:0002821	positive regulation of adaptive immune response	10.4993	0.00287685	0.0252359	Fcgr3/Fcgr1/H2-K1
GO:0071354	cellular response to interleukin-6	24.9101	0.00290048	0.0252575	Selp/Lcn2
GO:0009595	detection of biotic stimulus	24.1984	0.00307171	0.0263637	Pglyrp1/Tspo
GO:0032814	regulation of natural killer cell activation	24.1984	0.00307171	0.0263637	Pglyrp1/Lgals9
GO:0033574	response to testosterone	23.5262	0.00324759	0.0276741	Tspo/Hmgcs2
GO:0001818	negative regulation of cytokine production	6.39203	0.00339497	0.0287248	Fcgr2b/Pglyrp1/Lgals9/Tspo
GO:0002714	positive regulation of B cell mediated immunity	22.288	0.00361318	0.0296795	Fcgr3/Fcgr1
GO:0002891	positive regulation of immunoglobulin mediated immune response	22.288	0.00361318	0.0296795	Fcgr3/Fcgr1
GO:0070741	response to interleukin-6	22.288	0.00361318	0.0296795	Selp/Lcn2
GO:0001819	positive regulation of cytokine production	4.7796	0.00363219	0.0296795	Fcgr3/Fcgr2b/Fcgr1/Lgals9/Il4ra
GO:0051051	negative regulation of transport	4.7796	0.00363219	0.0296795	Icam1/Fcgr2b/Anxa2/Lgals9/Tspo
GO:0006694	steroid biosynthetic process	9.41049	0.0039164	0.0316429	Igfbp7/Tspo/Hmgcs2
GO:0010721	negative regulation of cell development	6.13728	0.00392553	0.0316429	Pglyrp1/C1qc/Tspo/Il4ra
GO:0045071	negative regulation of viral genome replication	20.6572	0.00419584	0.0335949	Ifitm3/Oasl2
GO:0046636	negative regulation of alpha-beta T cell activation	19.6964	0.00460689	0.0366401	Lgals9/Il4ra
GO:0002683	negative regulation of immune system process	4.50502	0.0046698	0.0368945	Fcgr2b/Pglyrp1/C1qc/Lgals9/Il4ra
GO:0045429	positive regulation of nitric oxide biosynthetic process	19.2487	0.00481913	0.0378238	Icam1/Itgb2
GO:0050728	negative regulation of inflammatory response	8.70148	0.00487507	0.0380128	Fcgr2b/Pglyrp1/Lgals9
GO:1903305	regulation of regulated secretory pathway	8.5839	0.00506325	0.0392238	Lgals9/Itgb2/Il4ra
GO:1902105	regulation of leukocyte differentiation	5.66518	0.0052118	0.039946	Pglyrp1/C1qc/Lgals9/Il4ra
GO:0095500	acetylcholine receptor signaling pathway	18.4118	0.00525693	0.039946	Ly6c1/Ly6a
GO:1904407	positive regulation of nitric oxide metabolic process	18.4118	0.00525693	0.039946	Icam1/Itgb2
GO:0030041	actin filament polymerization	8.41336	0.0053537	0.0404238	Icam1/Fam107a/Pecam1
GO:0031623	receptor internalization	8.24946	0.00565401	0.0420671	Sele/Anxa2/Itgb2
GO:0032613	interleukin-10 production	17.6447	0.00571238	0.0420671	Fcgr2b/Lgals9
GO:0032653	regulation of interleukin-10 production	17.6447	0.00571238	0.0420671	Fcgr2b/Lgals9
GO:1905145	cellular response to acetylcholine	17.6447	0.00571238	0.0420671	Ly6c1/Ly6a
GO:2000351	regulation of endothelial cell apoptotic process	17.2846	0.00594666	0.0433866	Icam1/Angptl4
GO:0007596	blood coagulation	8.09183	0.0059643	0.0433866	Selp/Angptl4/Anxa2
GO:0042110	T cell activation	4.23472	0.0060548	0.043778	Icam1/Lgals9/Lcp1/Itgb2/Il4ra
GO:0050817	coagulation	7.9401	0.00628463	0.0451661	Selp/Angptl4/Anxa2
GO:0007599	hemostasis	7.89079	0.00639366	0.045378	Selp/Angptl4/Anxa2
GO:0002707	negative regulation of lymphocyte mediated immunity	16.6068	0.00642823	0.045378	Fcgr2b/Lgals9
GO:0002823	negative regulation of adaptive immune response based on somatic recombination of immune receptors built from immunoglobulin superfamily domains	16.6068	0.00642823	0.045378	Fcgr2b/Il4ra
GO:0045620	negative regulation of lymphocyte differentiation	16.2874	0.00667549	0.0468462	Pglyrp1/Il4ra
GO:0043030	regulation of macrophage activation	15.9801	0.00692703	0.0483272	Lgals9/Il4ra
GO:0002820	negative regulation of adaptive immune response	15.6842	0.00718283	0.0495325	Fcgr2b/Il4ra
GO:0072678	T cell migration	15.6842	0.00718283	0.0495325	Icam1/Lgals9
