# Supplementary material
Source: Research Square preprint supplement (doi:10.21203/rs.3.rs-10072088/v1)
Supplement: Supplementary file 10 [file 9d63c7b70e7c6151f663c5fe.xlsx]

## Sheet: Sheet1
Module	Cell type	Genes	n	Remark	Reference
Pan_Apoptosis_Survival	All cell types (Pan_)	Bcl2, Bcl2l1, Mcl1, Bax, Bcl2l11, Casp3, Casp9, Trp53, Cdkn1a, Bag3	10	Universal apoptosis/survival axis (Bcl-2 family vs caspases).	Fricker M, Tolkovsky AM, Borutaite V, Coleman M, Brown GC. Neuronal cell death. Physiol Rev. 2018;98(2):813-880.
Pan_Cell_Stress_UPR	All cell types (Pan_)	Hspa5, Hsp90aa1, Hspa1a, Hspb1, Atf3, Atf4, Ddit3, Xbp1, Eif2ak3, Gadd45b	10	ER stress / UPR (PERK-IRE1-ATF6 branches).	Hetz C. The unfolded protein response: controlling cell fate decisions under ER stress and beyond. Nat Rev Mol Cell Biol. 2012;13(2):89-102.
Pan_Chemokine	All cell types (Pan_)	Ccl2, Ccl3, Ccl4, Ccl5, Ccl7, Ccl12, Cxcl1, Cxcl2, Cxcl9, Cxcl10, Cxcl16, Cx3cl1, Ccr2, Cx3cr1	14	Split from former Cytokine_Chemokine; CCL/CXCL chemoattractants.	Becher B, Spath S, Goverman J. Cytokine networks in neuroinflammation. Nat Rev Immunol. 2017;17(1):49-59.
Pan_Complement	All cell types (Pan_)	C1qa, C1qb, C1qc, C3, C4b, Cfb, Cfh, Itgam, Itgb2	9	Promoted from Microglia; C1q synaptic pruning .	Stevens B, et al. The classical complement cascade mediates CNS synapse elimination. Cell. 2007;131(6):1164-1178; Sekar A, et al. Nature. 2016;530:177-183
Pan_Cytokine	All cell types (Pan_)	Il1b, Il1a, Il6, Il18, Tnf, Il10, Il1rn, Lif, Csf1, Tgfb1, Il33, Il15, Il34	13	Interleukins + TNF family.	Becher B, Spath S, Goverman J. Cytokine networks in neuroinflammation. Nat Rev Immunol. 2017;17(1):49-59.
Pan_IEG_Activity_Response	All cell types (Pan_)	Fos, Fosb, Jun, Junb, Egr1, Egr2, Arc, Nr4a1, Nr4a2, Npas4	10	Activity- and stress-induced IEGs.	Sheng M, Greenberg ME. The regulation and function of c-fos and other immediate early genes in the nervous system. Neuron. 1990;4(4):477-485.
Pan_Inflammatory_Signaling	All cell types (Pan_)	Nfkb1, Nfkbia, Rela, Il6, Il1b, Tnf, Ccl2, Stat3, Socs3, Cxcl10	10	TF/receptor-level inflammatory signaling in CNS.	Becher B, Spath S, Goverman J. Cytokine networks in neuroinflammation. Nat Rev Immunol. 2017;17(1):49-59.
Pan_Interferon_Response	All cell types (Pan_)	Ifit1, Ifit2, Ifit3, Isg15, Mx1, Stat1, Irf7, Oasl2, Ifitm3, Ifi44	10	Antiviral / type-I IFN program (ISGs).	Schneider WM, Chevillotte MD, Rice CM. Interferon-stimulated genes: a complex web of host defenses. Annu Rev Immunol. 2014;32:513-545.
Pan_Lipid_Metabolism	All cell types (Pan_)	Apoe, Apoc1, Lpl, Lipa, Fabp5, Cd36, Abca1, Abcg1, Plin2, Msr1, Ldlr	11	Broad CNS lipid handling and transport.	Dietschy JM, Turley SD. Cholesterol metabolism in the central nervous system during early development and in the mature animal. J Lipid Res. 2004;45(8):1375-1397.
Pan_Mitochondrial_OxPhos	All cell types (Pan_)	Ndufa1, Ndufs1, Ndufb8, Cox4i1, Cox5a, Cox8a, Atp5f1a, Atp5f1b, Uqcrc1, Uqcrc2, Sdhb, Sdha, Cycs, Vdac1, Tfam, Ppargc1a, Chchd10	17	Enriched ETC/OXPHOS subunits; +Chchd10 (cristae integrity).	Nunnari J, Suomalainen A. Mitochondria: in sickness and in health. Cell. 2012;148(6):1145-1159.
Pan_NFkB_Signaling	All cell types (Pan_)	Nfkb1, Nfkb2, Rela, Tnfaip3, Nfkbia, Ikbkb, Il1b, Tnf, Il6, Ccl2, Ccl3, Cxcl10	12	Upstream kinases and effectors for NFkB signaling.	Hayden MS, Ghosh S. Shared principles in NF-kappaB signaling. Cell. 2008;132(3):344-362.
Pan_Oxidative_Stress	All cell types (Pan_)	Nfe2l2, Hmox1, Gpx1, Gpx4, Sod1, Sod2, Txn1, Txnip, Prdx1, Prdx2, Gclc, Gclm, Cat, Cybb, Hif1a, Sqstm1	16	Enriched Nrf2/redox program; +Gpx4, Txnip, Cybb, Sqstm1.	Ma Q. Role of Nrf2 in oxidative stress and toxicity. Annu Rev Pharmacol Toxicol. 2013;53:401-426.
Antigen_Presentation	Microglia	H2-Aa, H2-Ab1, H2-Eb1, Cd74, H2-D1, H2-K1, B2m, Tap1, Tap2, Tapbp, Ciita	11	MHC I/II antigen presentation, including H2-D1/K1.	Kettenmann H, Hanisch UK, Noda M, Verkhratsky A. Physiology of microglia. Physiol Rev. 2011;91(2):461-553.
Homeostatic	Microglia	P2ry12, P2ry13, Tmem119, Cx3cr1, Siglech, Fcrls, Sall1, Hexb, Gpr34, Olfml3	10	Core homeostatic microglial signature.	Butovsky O, et al. Identification of a unique TGF-beta-dependent molecular and functional signature in microglia. Nat Neurosci. 2014;17(1):131-143.
Lipid_DAM	Microglia	Apoe, Apoc1, Ch25h, Soat1, Lpl, Lipa, Trem2, Tyrobp, Axl, Fabp5, Cd36, Lgals3, Spp1, Gpnmb, Cd9, Cst7	16	Disease-associated microglia (DAM) signature.	Keren-Shaul H, et al. A unique microglia type associated with restricting development of Alzheimer's disease. Cell. 2017;169(7):1276-1290.e17.
Phagocytosis_Lysosome	Microglia	Trem2, Tyrobp, Axl, Mertk, Fcgr1, Fcgr2b, Fcgr3, Fcgr4, C1qa, C1qb, C1qc, Ctss, Ctsb, Ctsd, Lamp1, Lamp2, Cd68, Lyz2, Lgmn	19	Fcgr phagocytic effectors.	Nimmerjahn F, Ravetch JV. Fcgamma receptors as regulators of immune responses. Nat Rev Immunol. 2008;8(1):34-47.
A1_Neurotoxic	Astrocyte	C3, Serping1, Ggta1, Amigo2, B2m, Psmb8, Psmb9, Tap1, Lcn2, Cxcl10	10	A1 neurotoxic polarisation.	Liddelow SA, et al. Neurotoxic reactive astrocytes are induced by activated microglia. Nature. 2017;541(7638):481-487.
A2_Neuroprotective	Astrocyte	S100a10, Clcf1, Tgm1, Ptgs2, Emp1, Cd109, Sphk1, Stat3	8	A2 neuroprotective polarisation.	Zamanian JL, et al. Genomic analysis of reactive astrogliosis. J Neurosci. 2012;32(18):6391-6410.
Homeostatic_Astrocyte	Astrocyte	Aldh1l1, Aqp4, Slc1a2, Slc1a3, Gja1, Gjb6, Glul, Fgfr3, Sox9, Ndrg2	10	Core astrocyte identity / homeostatic markers.	Khakh BS, Sofroniew MV. Diversity of astrocyte functions and phenotypes in neural circuits. Nat Neurosci. 2015;18(7):942-952.
Neurotransmitter_Clearance	Astrocyte	Slc1a2, Slc1a3, Glul, Sparcl1, Thbs1, Thbs2, Gpc4, Gpc6, Clu, Apoe	10	Glutamate clearance (EAAT1/2) + synaptogenic factors.	Danbolt NC. Glutamate uptake. Prog Neurobiol. 2001;65(1):1-105.
Reactive_Astrocyte_General	Astrocyte	Gfap, Vim, Nes, Serpina3n, Lcn2, Timp1, Cxcl10, S100b	8	Pan-reactive entry state; precedes A1/A2.	Escartin C, et al. Reactive astrocyte nomenclature, definitions, and future directions. Nat Neurosci. 2021;24(3):312-325.
Neurodegeneration	Excitatory Neuron	Bax, Bcl2l11, Casp3, Casp9, App, Mapt, Apoe, Cdkn1a, Gadd45a	9	Neuronal apoptosis/degeneration effectors.	Fricker M, Tolkovsky AM, Borutaite V, Coleman M, Brown GC. Neuronal cell death. Physiol Rev. 2018;98(2):813-880.
Neuronal_Identity	Excitatory Neuron	Slc17a7, Slc17a6, Camk2a, Camk2b, Neurod6, Satb2, Tbr1, Rbfox3, Grin1, Gria2	10	Glutamatergic projection-neuron identity (vGlut1/2, Satb2, Tbr1).	Lodato S, Arlotta P. Generating neuronal diversity in the mammalian cerebral cortex. Annu Rev Cell Dev Biol. 2015;31:699-720.
Synaptic_Plasticity	Excitatory Neuron	Gria1, Gria2, Gria3, Grin1, Grin2a, Grin2b, Dlg4, Homer1, Shank2, Shank3, Syn1, Syn2, Bdnf	13	AMPA/NMDA receptors + postsynaptic scaffolds; LTP/LTD machinery.	Citri A, Malenka RC. Synaptic plasticity: multiple forms, functions, and mechanisms. Neuropsychopharmacology. 2008;33(1):18-41.
GABA_Synthesis	Inhibitory Neuron	Gad1, Gad2, Slc32a1, Aldh5a1, Abat, Gabra1, Gabrb2, Gabrd, Gabrg2	9	GABA synthesis/catabolism + receptor subunits.	Tremblay R, Lee S, Rudy B. GABAergic interneurons in the neocortex: from cellular properties to circuits. Neuron. 2016;91(2):260-292.
SST_Identity	Inhibitory Neuron	Sst, Npy, Cort, Calb1, Reln, Pvalb, Kcnc1	7	SST interneuron subtype markers.	Tremblay R, Lee S, Rudy B. GABAergic interneurons in the neocortex: from cellular properties to circuits. Neuron. 2016;91(2):260-292.
VIP_Identity	Inhibitory Neuron	Vip, Vipr2, Crh, Calb2, Cck, Pde11a, Isl1, Drd3	8	VIP/5HT3aR interneuron subtype markers.	Tremblay R, Lee S, Rudy B. GABAergic interneurons in the neocortex: from cellular properties to circuits. Neuron. 2016;91(2):260-292.
Lipid_Synthesis	Oligodendrocyte	Fa2h, Ugt8, Aspa, Scd, Fasn, Hmgcr, Fdps, Sqle, Dhcr7, Cyp51	10	Myelin lipid/cholesterol biosynthesis.	Nave KA, Werner HB. Myelination of the nervous system: mechanisms and functions. Annu Rev Cell Dev Biol. 2014;30:503-533.
Myelination	Oligodendrocyte	Mbp, Mog, Plp1, Cnp, Mal, Mobp, Mag, Omg, Myrf, Nkx2-2	10	Core compact-myelin genes + Myrf.	Nave KA, Werner HB. Myelination of the nervous system: mechanisms and functions. Annu Rev Cell Dev Biol. 2014;30:503-533.
Differentiation	OPC	Tcf7l2, Nkx2-2, Sox4, Enpp6, Serpine2, Gpr37, Cnp, Sirt2, Zfp36l1	9	OPC->OL differentiation/commitment.	Bergles DE, Richardson WD. Oligodendrocyte development and plasticity. Cold Spring Harb Perspect Biol. 2016;8(2):a020453.
OPC_Identity	OPC	Pdgfra, Olig2, Sox10, Cspg4, Neu4, Gpr17, C1ql1, Lhfpl3, Ptprz1	9	OPC (NG2 glia) lineage identity.	Bergles DE, Richardson WD. Oligodendrocyte development and plasticity. Cold Spring Harb Perspect Biol. 2016;8(2):a020453.
Proliferation	OPC	Mki67, Top2a, Pcna, Mcm2, Cdk1, Ccnd1, Ccna2, Ube2c, Birc5	9	Cell-cycle/proliferation; OPC response to demyelinating injury.	Fancy SP, et al. Axin2 as regulatory and therapeutic target in newborn brain injury and remyelination. Nat Neurosci. 2011;14(8):1009-1016.
Stress_Quiescence	OPC	Atf3, Cdkn1a, Cdkn2a, Trp53, Gadd45b, Ddit3, Hspa5, Hmox1, Nfe2l2	9	OPC cell-cycle exit / stress-induced quiescence.	Bergles DE, Richardson WD. Oligodendrocyte development and plasticity. Cold Spring Harb Perspect Biol. 2016;8(2):a020453.
BBB_Tight_Junction	Endothelial	Cldn5, Ocln, Tjp1, Tjp2, Cdh5, Ctnna1, Ctnnb1, Pecam1, Esam	9	BBB integrity; Ctnnb1 from Wnt/beta-catenin.	Daneman R, Prat A. The blood-brain barrier. Cold Spring Harb Perspect Biol. 2015;7(1):a020412; Liebner S, et al. J Cell Biol. 2008;183:409-417.
Inflammation_Activation	Endothelial	Icam1, Vcam1, Sele, Selp, Cxcl1, Il6, Ccl2, Nos2, Ptgs2, Nfkb1	10	Endothelial activation: adhesion molecules + chemokines.	Pober JS, Sessa WC. Evolving functions of endothelial cells in inflammation. Nat Rev Immunol. 2007;7(10):803-815.
Transport_Efflux	Endothelial	Mfsd2a, Slco1c1, Slc7a5, Abcb1a, Abcg2, Slc2a1, Slc16a1, Lrp1, Tfrc	9	BBB influx/efflux transporters.	Daneman R, Prat A. The blood-brain barrier. Cold Spring Harb Perspect Biol. 2015;7(1):a020412.
Contractile_Function	Pericyte	Acta2, Tagln, Myh11, Des, Cnn1, Mylk, Myl9	7	Pericyte contractile apparatus (alpha-SMA, etc.).	Hall CN, et al. Capillary pericytes regulate cerebral blood flow in health and disease. Nature. 2014;508(7494):55-60.
ECM_Basement_Membrane	Pericyte	Col4a1, Col4a2, Lama1, Lamb1, Fn1, Fbln1, Nid1, Nid2, Hspg2	9	Vascular basement-membrane ECM.	Vanlandewijck M, et al. A molecular atlas of cell types and zonation in the brain vasculature. Nature. 2018;554(7693):475-480.
Pericyte_Identity	Pericyte	Pdgfrb, Rgs5, Acta2, Cspg4, Vtn, Kcnj8, Abcc9, Anpep, Cd248	9	Core pericyte/mural-cell identity.	Vanlandewijck M, et al. A molecular atlas of cell types and zonation in the brain vasculature. Nature. 2018;554(7693):475-480.
