# Supplementary material
Source: Research Square preprint supplement (doi:10.21203/rs.3.rs-10072088/v1)
Supplement: Supplementary file 11 [file a6d000f3f06baeb45340256f.xlsx]

## Sheet: DEG_GO_KEGG_summary_counts
comparison	threshold_type	n_up_deg	n_down_deg	n_sig_deg_total	n_sig_GO_up	n_sig_GO_down	n_sig_GO_total	n_sig_KEGG_up	n_sig_KEGG_down	n_sig_KEGG_total
Ctrl_Veh_LPS_vs_Ctrl_Veh_PBS = Ctrl.Veh.LPS - Ctrl.Veh.PBS	Padj05_lowFC	1391	1377	2768	128	317	445	10	29	39
Ctrl_Veh_LPS_vs_Ctrl_Veh_PBS = Ctrl.Veh.LPS - Ctrl.Veh.PBS	Padj05_noFC	1720	1550	3270	165	287	452	10	31	41
Ctrl_Veh_LPS_vs_Ctrl_Veh_PBS = Ctrl.Veh.LPS - Ctrl.Veh.PBS	Pvalue05_lowFC	1924	2170	4094	186	369	555	9	46	55
Ctrl_Veh_LPS_vs_Ctrl_Veh_PBS = Ctrl.Veh.LPS - Ctrl.Veh.PBS	Pvalue05_noFC	2807	2702	5509	286	252	538	18	43	61
GW_CBD_LPS_vs_GW_Veh_LPS = GW.CBD.LPS - GW.Veh.LPS	Padj05_lowFC	167	177	344	0	51	51	1	4	5
GW_CBD_LPS_vs_GW_Veh_LPS = GW.CBD.LPS - GW.Veh.LPS	Padj05_noFC	170	183	353	0	51	51	1	4	5
GW_CBD_LPS_vs_GW_Veh_LPS = GW.CBD.LPS - GW.Veh.LPS	Pvalue05_lowFC	934	713	1647	136	35	171	4	2	6
GW_CBD_LPS_vs_GW_Veh_LPS = GW.CBD.LPS - GW.Veh.LPS	Pvalue05_noFC	1242	1074	2316	111	47	158	6	2	8
GW_CBD_PBS_vs_GW_Veh_PBS = GW.CBD.PBS - GW.Veh.PBS	Padj05_lowFC	0	0	0	0	0	0	0	0	0
GW_CBD_PBS_vs_GW_Veh_PBS = GW.CBD.PBS - GW.Veh.PBS	Padj05_noFC	0	0	0	0	0	0	0	0	0
GW_CBD_PBS_vs_GW_Veh_PBS = GW.CBD.PBS - GW.Veh.PBS	Pvalue05_lowFC	390	693	1083	0	68	68	0	17	17
GW_CBD_PBS_vs_GW_Veh_PBS = GW.CBD.PBS - GW.Veh.PBS	Pvalue05_noFC	653	918	1571	0	71	71	3	16	19
GW_Veh_LPS_vs_Ctrl_Veh_LPS = GW.Veh.LPS - Ctrl.Veh.LPS	Padj05_lowFC	0	1	1	0	0	0	0	0	0
GW_Veh_LPS_vs_Ctrl_Veh_LPS = GW.Veh.LPS - Ctrl.Veh.LPS	Padj05_noFC	0	1	1	0	0	0	0	0	0
GW_Veh_LPS_vs_Ctrl_Veh_LPS = GW.Veh.LPS - Ctrl.Veh.LPS	Pvalue05_lowFC	777	618	1395	2	125	127	5	15	20
GW_Veh_LPS_vs_Ctrl_Veh_LPS = GW.Veh.LPS - Ctrl.Veh.LPS	Pvalue05_noFC	1063	1134	2197	5	142	147	1	26	27
GW_Veh_LPS_vs_GW_Veh_PBS = GW.Veh.LPS - GW.Veh.PBS	Padj05_lowFC	685	742	1427	44	38	82	3	28	31
GW_Veh_LPS_vs_GW_Veh_PBS = GW.Veh.LPS - GW.Veh.PBS	Padj05_noFC	784	826	1610	54	49	103	3	38	41
GW_Veh_LPS_vs_GW_Veh_PBS = GW.Veh.LPS - GW.Veh.PBS	Pvalue05_lowFC	1472	1529	3001	59	102	161	4	25	29
GW_Veh_LPS_vs_GW_Veh_PBS = GW.Veh.LPS - GW.Veh.PBS	Pvalue05_noFC	2085	1996	4081	143	72	215	4	17	21
GW_Veh_PBS_vs_Ctrl_Veh_PBS = GW.Veh.PBS - Ctrl.Veh.PBS	Padj05_lowFC	0	0	0	0	0	0	0	0	0
GW_Veh_PBS_vs_Ctrl_Veh_PBS = GW.Veh.PBS - Ctrl.Veh.PBS	Padj05_noFC	0	0	0	0	0	0	0	0	0
GW_Veh_PBS_vs_Ctrl_Veh_PBS = GW.Veh.PBS - Ctrl.Veh.PBS	Pvalue05_lowFC	167	288	455	1	149	150	2	15	17
GW_Veh_PBS_vs_Ctrl_Veh_PBS = GW.Veh.PBS - Ctrl.Veh.PBS	Pvalue05_noFC	253	335	588	0	94	94	11	15	26
delta_LPS_response_CBD_minus_Veh_inGW = (GW.CBD.LPS - GW.CBD.PBS) - (GW.Veh.LPS - GW.Veh.PBS)	Padj05_lowFC	1	0	1	2	0	2	0	0	0
delta_LPS_response_CBD_minus_Veh_inGW = (GW.CBD.LPS - GW.CBD.PBS) - (GW.Veh.LPS - GW.Veh.PBS)	Padj05_noFC	1	0	1	2	0	2	0	0	0
delta_LPS_response_CBD_minus_Veh_inGW = (GW.CBD.LPS - GW.CBD.PBS) - (GW.Veh.LPS - GW.Veh.PBS)	Pvalue05_lowFC	1219	976	2195	54	26	80	25	2	27
delta_LPS_response_CBD_minus_Veh_inGW = (GW.CBD.LPS - GW.CBD.PBS) - (GW.Veh.LPS - GW.Veh.PBS)	Pvalue05_noFC	1329	1117	2446	43	30	73	25	2	27
delta_LPS_response_GW_minus_Ctrl = (GW.Veh.LPS - GW.Veh.PBS) - (Ctrl.Veh.LPS - Ctrl.Veh.PBS)	Padj05_lowFC	0	0	0	0	0	0	0	0	0
delta_LPS_response_GW_minus_Ctrl = (GW.Veh.LPS - GW.Veh.PBS) - (Ctrl.Veh.LPS - Ctrl.Veh.PBS)	Padj05_noFC	0	0	0	0	0	0	0	0	0
delta_LPS_response_GW_minus_Ctrl = (GW.Veh.LPS - GW.Veh.PBS) - (Ctrl.Veh.LPS - Ctrl.Veh.PBS)	Pvalue05_lowFC	772	915	1687	1	154	155	0	15	15
delta_LPS_response_GW_minus_Ctrl = (GW.Veh.LPS - GW.Veh.PBS) - (Ctrl.Veh.LPS - Ctrl.Veh.PBS)	Pvalue05_noFC	849	1108	1957	7	130	137	1	17	18

## Sheet: Table
GWI-associated changes
Condition	Comparison	DEG threshold type	Up-DEG number	Down-DEG number	Total DEG number	Up-GO terms number	Down-GO terms number	Total GO terms number	Up-KEGG terms number	Down-KEGG terms number	Total KEGG terms number
Basal	GW_Veh_PBS_vs_Ctrl_Veh_PBS	Padj < 0.05 + FC	0	0	0	0	0	0	0	0	0
	GW_Veh_PBS_vs_Ctrl_Veh_PBS	Padj < 0.05, no FC	0	0	0	0	0	0	0	0	0
	GW_Veh_PBS_vs_Ctrl_Veh_PBS	P < 0.05 + FC	167	288	455	1	149	150	2	15	17
	GW_Veh_PBS_vs_Ctrl_Veh_PBS	P < 0.05, no FC	253	335	588	0	94	94	12	15	27
Immune-stimulated	GW_Veh_LPS_vs_Ctrl_Veh_LPS	Padj < 0.05 + FC	0	1	1	0	0	0	0	0	0
	GW_Veh_LPS_vs_Ctrl_Veh_LPS	Padj < 0.05, no FC	0	1	1	0	0	0	0	0	0
	GW_Veh_LPS_vs_Ctrl_Veh_LPS	P < 0.05 + FC	777	618	1395	2	125	127	5	15	20
	GW_Veh_LPS_vs_Ctrl_Veh_LPS	P < 0.05, no FC	1063	1134	2197	5	142	147	1	26	27
Condition	Comparison	DEG threshold type	Up-DEG number	Down-DEG number	Total DEG number	Up-GO terms number	Down-GO terms number	Total GO terms number	Up-KEGG terms number	Down-KEGG terms number	Total KEGG terms number
DeltaLPS	delta_LPS_response_GW_minus_Ctrl	Padj < 0.05 + FC	0	0	0	0	0	0	0	0	0
	delta_LPS_response_GW_minus_Ctrl	Padj < 0.05, no FC	0	0	0	0	0	0	0	0	0
	delta_LPS_response_GW_minus_Ctrl	P < 0.05 + FC	772	915	1687	1	154	155	0	15	15
	delta_LPS_response_GW_minus_Ctrl	P < 0.05, no FC	849	1108	1957	7	130	137	1	17	18
LPS-induced changes
Condition	Comparison	DEG threshold type	Up-DEG number	Down-DEG number	Total DEG number	Up-GO terms number	Down-GO terms number	Total GO terms number	Up-KEGG terms number	Down-KEGG terms number	Total KEGG terms number
Control	Ctrl_Veh_LPS_vs_Ctrl_Veh_PBS	Padj < 0.05 + FC	1391	1377	2768	128	317	445	10	29	39
	Ctrl_Veh_LPS_vs_Ctrl_Veh_PBS	Padj < 0.05, no FC	1720	1550	3270	165	287	452	10	31	41
	Ctrl_Veh_LPS_vs_Ctrl_Veh_PBS	P < 0.05 + FC	1924	2170	4094	186	369	555	9	46	55
	Ctrl_Veh_LPS_vs_Ctrl_Veh_PBS	P < 0.05, no FC	2807	2702	5509	286	252	538	18	43	61
GWI	GW_Veh_LPS_vs_GW_Veh_PBS	Padj < 0.05 + FC	685	742	1427	44	38	82	3	28	31
	GW_Veh_LPS_vs_GW_Veh_PBS	Padj < 0.05, no FC	784	826	1610	54	49	103	3	39	42
	GW_Veh_LPS_vs_GW_Veh_PBS	P < 0.05 + FC	1472	1529	3001	59	102	161	4	25	29
	GW_Veh_LPS_vs_GW_Veh_PBS	P < 0.05, no FC	2085	1996	4081	143	72	215	4	16	20
CBD treatment effects
Condition	Comparison	DEG threshold type	Up-DEG number	Down-DEG number	Total DEG number	Up-GO terms number	Down-GO terms number	Total GO terms number	Up-KEGG terms number	Down-KEGG terms number	Total KEGG terms number
Basal	GW_CBD_PBS_vs_GW_Veh_PBS	Padj < 0.05 + FC	0	0	0	0	0	0	0	0	0
	GW_CBD_PBS_vs_GW_Veh_PBS	Padj < 0.05, no FC	0	0	0	0	0	0	0	0	0
	GW_CBD_PBS_vs_GW_Veh_PBS	P < 0.05 + FC	390	693	1083	0	68	68	0	17	17
	GW_CBD_PBS_vs_GW_Veh_PBS	P < 0.05, no FC	653	918	1571	0	71	71	3	16	19
Immune-stimulated	GW_CBD_LPS_vs_GW_Veh_LPS	Padj < 0.05 + FC	167	177	344	0	51	51	1	4	5
	GW_CBD_LPS_vs_GW_Veh_LPS	Padj < 0.05, no FC	170	183	353	0	51	51	1	3	4
	GW_CBD_LPS_vs_GW_Veh_LPS	P < 0.05 + FC	934	713	1647	136	35	171	4	2	6
	GW_CBD_LPS_vs_GW_Veh_LPS	P < 0.05, no FC	1242	1074	2316	111	47	158	6	2	8
Condition	Comparison	DEG threshold type	Up-DEG number	Down-DEG number	Total DEG number	Up-GO terms number	Down-GO terms number	Total GO terms number	Up-KEGG terms number	Down-KEGG terms number	Total KEGG terms number
DeltaLPS	delta_LPS_response_CBD_minus_Veh_in GW	Padj < 0.05 + FC	1	0	1	2	0	2	0	0	0
	delta_LPS_response_CBD_minus_Veh_in GW	Padj < 0.05, no FC	1	0	1	2	0	2	0	0	0
	delta_LPS_response_CBD_minus_Veh_in GW	P < 0.05 + FC	1219	976	2195	54	26	80	25	2	27
	delta_LPS_response_CBD_minus_Veh_in GW	P < 0.05, no FC	1329	1117	2446	43	30	73	25	2	27
