# Supplementary material
Source: Research Square preprint supplement (doi:10.21203/rs.3.rs-10072088/v1)
Supplement: Supplementary file 12 [file af27fc85b0e3fa5133e3e98f.xlsx]

## Sheet: broad_celltype_counts
Broad Cell Type	Number of Fine_cell_types	Ctrl	GWI	Total	Ctrl%	GWI%	% GWI vs Ctrl	Top Markers
Excitatory Neuron	9	9453	8522	17975	52.5897	47.4103	-9.84873	Clmp, Gria1, Gm26871, Cnnm1, B830012L14Rik, Nrg2, Celf4, Sptbn4, Pkia, Rbfox1, Adgrb3, Reep1, Kcnq2, Scn2a, Macrod2, Olfm3, Grb10, Gap43, Fras1, Tenm4
Inhibitory Neuron	5	2191	2348	4539	48.2705	51.7295	7.16568	Nhs, Bcl11a, Robo2, Ccser1, Nalf1, A230057D06Rik, Dlx6os1, Kcnip1, Grip1, Gad1, C130073E24Rik, Fgf13, Cracd, Sox2ot, Cntnap4, Galntl6, Zmat4, Adcy8, Dcx, Pbx1
Oligodendrocyte	1 (MOL)	2881	3035	5916	48.6984	51.3016	5.34537	4930420G21Rik, Gm19500, A230001M10Rik, C030029H02Rik, A330049N07Rik, St18, Prr5l, Gm42756, Insc, Mog, Opalin, Sec14l5, Plp1, Aspa, 9330111N05Rik, Mag, Anln, Ninj2, Mal, 1700047M11Rik
OPC	1	238	373	611	38.9525	61.0475	56.7227	Gpr17, Neu4, Pdgfra, C1ql1, Cspg4, Vcan, Susd5, 6030407O03Rik, Sema3d, Shc4, Emid1, Matn4, Kcnh8, Calcrl, Afap1l2, Plpp4, Scel, Rgcc, Cacng4, Galnt3
Astrocyte	2 (Astrocyte, Astro-Fib)	2476	2673	5149	48.087	51.913	7.95638	Gjb6, Slc7a2, Col23a1, Slc7a11, Trabd2b, Sned1, Cped1, Ranbp3l, Atp1a2, Gja1, Nxn, Ptgds, Nhsl1, Slc1a3, Eya1, Zfp423, Tcf7l1, Timp3, 9530026P05Rik, Cfh
Microglia	2 (Micro-Homeo, Micro-Act)	1174	1079	2253	52.1083	47.8917	-8.09199	Ly86, Fyb, Gm2629, Ptprc, Ikzf1, Runx1, Siglech, Gm10790, Laptm5, Inpp5d, Dock8, Ctss, Dock2, Csf1r, Slco2b1, Hpgds, C1qc, C1qa, Cx3cr1, P2ry12
Endothelial	1	95	103	198	47.9798	52.0202	8.42105	Adgrl4, Cldn5, Ly6c1, Mecom, Slco1a4, Cyyr1, Sox17, Flt1, Ctla2a, Foxq1, Zfp366, Adgrf5, Vwf, Ly6a, Abcb1a, Hspb1, Erg, Ptprb, Klf4, Id1
Pericyte	1	63	78	141	44.6809	55.3191	23.8095	Gm36823, Tbx3os1, Abcc9, Carmn, Slc38a11, Pla2r1, Enpep, Vtn, Egflam, Atp13a5, Gjc1, Notch3, Itga1, Morrbid, Art3, Nid1, Ednra, Irag1, Ano1, Pdgfrb
Other	Other	544	419	963	56.4901	43.5099	-22.9779	N/A
Fine_cell_type	Corresponding broad_cell_type	Ctrl	GWI	Total	Ctrl%	GWI%	% GWI vs Ctrl	Top Markers
Astro-Fib	Astrocyte	104	114	218	47.7064	52.2936	9.61538	Prdm6, Aldh1a2, Slc6a13, Slc13a4, Aox3
Astrocyte	Astrocyte	2372	2559	4931	48.1038	51.8962	7.88364	Pdzph1, Gm973, Atp13a4, Gli2, Acsbg1, ENSMUSG00000120124, Col5a1, Dpp4, Trabd2b, Hs3st4, Acot11, Gm5089, Gm6145, C030018K13Rik, Plcd4, Gldc, Aqp4, Zfpm2
Endothelial	Endothelial	95	103	198	47.9798	52.0202	8.42105	Adgrl4, Cldn5, Ly6c1, Mecom, Slco1a4
ExN-CA1	Excitatory Neuron	3528	3941	7469	47.2352	52.7648	11.7063	Ccbe1, Igfn1, Trpc6, Smoc2, Otof, Gm20752, Gm40331, Ovol2, Hgf, Gm13601, Gm49678, Dpp10, Plec, Pcsk5, Calm3, Gm32793, Sh3rf2, Ccdc3, Mei1
ExN-CA1-Rspo2	Excitatory Neuron	1282	1219	2501	51.2595	48.7405	-4.9142	Slc26a4, Rxfp1, Rspo2, Gm11639, Gm49678
ExN-CA3	Excitatory Neuron	885	834	1719	51.4834	48.5166	-5.76271	Ndst4, Abi3bp, Tafa2, Tafa1, Lmo3
ExN-DG-Drd1	Excitatory Neuron	1317	869	2186	60.247	39.753	-34.0167	Pdyn, Drd1, Sh3rf2, Rarb, Gm49906
ExN-DG-Drd2	Excitatory Neuron	1077	763	1840	58.5326	41.4674	-29.1551	Drd2, Adora2a, Gpr6, Penk, Sh3rf2, Gm49906, Ano2
ExN-DG-Zic1	Excitatory Neuron	604	267	871	69.3456	30.6544	-55.7947	Ano1, Scn5a, St8sia6, Htr7, Zic1
ExN-NP	Excitatory Neuron	126	128	254	49.6063	50.3937	1.5873	BB557941, Nr4a2, Gm42397, B130024G19Rik, Col24a1
ExN-Sub	Excitatory Neuron	65	45	110	59.0909	40.9091	-30.7692	Sfta3-ps, Pthlh, Gna14, Gm31218, Moxd1
ExN-Sub-Foxp2	Excitatory Neuron	303	206	509	59.5285	40.4715	-32.0132	Gm40663, Casz1, Chst9, Foxp2, Gm13974
ExN-VGluT2-Trhr	Excitatory Neuron	266	250	516	51.5504	48.4496	-6.01504	Myzap, Tshz2, Vwc2l, Trhr, Col12a1
InN-Glra2	Inhibitory Neuron	177	148	325	54.4615	45.5385	-16.3842	Or5v1b, Ccn2, Nxph4, Fbxl7, Myocd
InN-Isl1	Inhibitory Neuron	139	101	240	57.9167	42.0833	-27.3381	Stac, Gm12068, Drd3, Isl1, Gpr149
InN-Ndnf	Inhibitory Neuron	141	155	296	47.6351	52.3649	9.92908	2610307P16Rik, Ndnf, Plpp4, Klhl1, Pde3a
InN-SST	Inhibitory Neuron	901	876	1777	50.7034	49.2966	-2.77469	6330411D24Rik, Lhx6, Sst, 9630002D21Rik, Tmem132c
InN-VIP	Inhibitory Neuron	833	1068	1901	43.819	56.181	28.2113	Dnah11, Vipr2, Adamts19, Frmd7, Lgr5, Vip, Pde11a, Igf1, Pnoc, Adarb2
Micro-Act	Microglia	2881	3035	5916	48.6984	51.3016	5.34537	Ptprc, Fyb, Ikzf1, Ly86, Ctss
Micro-Homeo	Microglia	172	182	354	48.5876	51.4124	5.81395	Cd86, Vis1, Siglech, Gm2629, Itgam
MOL	Oligodendrocyte	1002	897	1899	52.7646	47.2354	-10.479	4930420G21Rik, Gm19500, A230001M10Rik, C030029H02Rik, A330049N07Rik
OPC	OPC	238	373	611	38.9525	61.0475	56.7227	Gpr17, Neu4, Pdgfra, C1ql1, Cspg4
Other	Other	544	419	963	56.4901	43.5099	-22.9779	N/A
Pericyte	Pericyte	63	78	141	44.6809	55.3191	23.8095	Gm36823, Tbx3os1, Abcc9, Carmn, Slc38a11
